# Supplementary material for: HIF-3α-Induced miR-630 Expression Promotes Cancer Hallmarks in Cervical Cancer Cells by Forming a Positive Feedback Loop
Source: Hindawi journal article supplement (doi:10.1155/2022/5262963), 2022-10-13
Supplement: f1 [file 5262963.f1.zip]

Table S2. Differentially expressed genes (DEGs) between miR-630 and the control group

| Gene               | logFC       | logCPM     | Pvalue     | FDR        | Vec1   | Vec2  | miR630_1   | miR630_2  | Symbol       | Description                                                                       | Chromosome | Genotype       |
|--------------------|-------------|------------|------------|------------|--------|-------|------------|-----------|--------------|-----------------------------------------------------------------------------------|------------|----------------|
| ENSG00000257627.1  | 1.0234956   | 5.20131879 | 0.00014732 | 0.00057331 | 3.2    | 3.81  | 1.81       | MIH7319.3 | miR-3193     | incRNA                                                                            | chr20      | protein_coding |
| ENSG00000103103.1  | 1.10234956  | 5.20131879 | 0.00014732 | 0.00057331 | 3.2    | 3.81  | 1.81       | MIH7319.3 | miR-3193     | incRNA                                                                            | chr20      | protein_coding |
| ENSG00000103899.1  | 1.73178534  | -0.4213853 | 0.00020024 | 0.00076235 | 0.04   | 0.16  | 0.59       | 0.32      | RUNDC3A      | RNA domain containing 3A                                                          | chr17      | protein_coding |
| ENSG0000057704.9   | 0.03340172  | 0.03340172 | 0.0003401  | 0.00130281 | 0.01   | 0.01  | 0.01       | 0.01      | TMC23C1      | transmembrane and coiled-coil domain family 3                                     | chr17      | protein_coding |
| ENSG00000189632.1  | -1.0171833  | 5.86513658 | 0.00042081 | 0.00149293 | 10.38  | 9.26  | 5.88       | 7.08      | BICD2        | bicuculid D homolog 2 (Drosophila)                                                | chr9       | protein_coding |
| ENSG00000114698.1  | 2.46415426  | -0.2891022 | 2.04E-07   | 1.31E-06   | 0.05   | 0.05  | 0.23       | 0.05      | PILSCRA      | phospholipid scramblase 4                                                         | chr9       | protein_coding |
| ENSG00000248199.1  | 0.157457    | -0.1918486 | 2.49E-14   | 3.72E-13   | 2.68   | 3.8   | 0          | 0         | CTD-2131981  | CTD-2131981                                                                       | chr17      | incRNA         |
| ENSG00000173480.9  | 1.7894051   | 0.10587979 | 1.71E-05   | 7.97E-05   | 0.08   | 0.12  | 0.45       | 0.47      | ZNF417       | zinc finger protein 417                                                           | chr19      | protein_coding |
| ENSG00000129517.1  | 1.3022089   | 2.91197562 | 2.12E-05   | 0.08E-05   | 0.96   | 1.05  | 2.31       | 4.31      | SNHG         | sorbing nexin 6                                                                   | chr14      | protein_coding |
| ENSG00000248767.1  | -2.07503183 | 0.09494103 | 0.0001674  | 0.00062431 | 0.27   | 0.19  | 0.19       | 0.19      | RP11-666A2.1 | RP11-666A2.1                                                                      | chr19      | incRNA         |
| ENSG0000025795.11  | 1.6493062   | -0.1535694 | 0.00011663 | 0.00042666 | 0.02   | 0.07  | 0.12       | 0.26      | PNP2         | intrinsic interacting protein                                                     | chr4       | protein_coding |
| ENSG0000017402.16  | -1.0753588  | 6.24271305 | 0.0001674  | 0.00062431 | 0.27   | 0.19  | 0.19       | 0.19      | KHDC3        | kelch domain containing 3                                                         | chr19      | protein_coding |
| ENSG000005801.16   | 1.3411429   | 3.22277999 | 9.44E-06   | 4.61E-05   | 45.3   | 36.93 | 26.31      | 0.95      | MYCBP2       | MYC binding protein 2, E3 ubiquitin protein ligase                                | chr13      | protein_coding |
| ENSG00000181095.13 | -8.0070223  | -0.9638217 | 7.69E-14   | 1.09E-12   | 0.4    | 0.26  | 0          | 0         | MAPK15       | mitogen-activated protein kinase 15                                               | chr8       | protein_coding |
| ENSG00000277111.1  | 1.1188577   | 2.93071039 | 0.0022913  | 0.0089377  | 1.05   | 3.25  | 9.57       | 0.15      | CTD-3035K2   | CTD-3035K2                                                                        | chr17      | incRNA         |
| ENSG00000104221.11 | -0.1068958  | 5.1728639  | 0.00024846 | 0.00092498 | 9.75   | 8.6   | 6.01       | 5.84      | BRF2         | BRF2, RNA polymerase III transcription initiation factor 50 kDa subunit           | chr17      | protein_coding |
| ENSG00000104431.16 | 1.9033386   | 2.40088238 | 2.94E-09   | 2.42E-08   | 2.01   | 1.14  | 9.03       | 6.73      | WDFC2        | WAF four-disulfide core domain 2                                                  | chr20      | protein_coding |
| ENSG00000268975.1  | 1.1188577   | 2.93071039 | 0.0022913  | 0.0089377  | 1.05   | 3.25  | 9.57       | 0.15      | CTD-3035K2   | CTD-3035K2                                                                        | chr17      | incRNA         |
| ENSG00000268967.5  | -1.6895367  | 6.53070035 | 7.78E-09   | 6.05E-08   | 89.66  | 83.13 | 36.95      | 34.38     | AARS1D       | alanyl-tRNA synthetase domain containing 1                                        | chr17      | protein_coding |
| ENSG00000278277.1  | 9.24136049  | 0.31654077 | 9.98E-24   | 1.36E-22   | 0      | 0     | 0          | 0         | HST13HC      | histone cluster 1, H3c                                                            | chr19      | protein_coding |
| ENSG00000142453.10 | -1.2275573  | 7.34769265 | 2.10E-05   | 9.90E-05   | 55.9   | 55.06 | 34.09      | 28.92     | CARM1        | coactivator-associated arginine methyltransferase 1                               | chr19      | protein_coding |
| ENSG00000103942.11 | 2.69545931  | 0.3980122  | 1.09E-17   | 2.19E-16   | 1.45   | 1.87  | 13.79      | 14.83     | HOMER2       | homer scaffolding protein                                                         | chr15      | protein_coding |
| ENSG0000026269.14  | 2.86847962  | 2.93415073 | 3.40E-18   | 7.10E-17   | 0.33   | 0.6   | 3.42       | 5.62      | PPP1R21      | protein phosphatase 1, regulatory subunit 21                                      | chr2       | protein_coding |
| ENSG0000016157.10  | -2.9711959  | 4.90146921 | 1.70E-21   | 4.82E-20   | 0.37   | 0.87  | 33.86      | 4.59      | PRC2         | paired related homeobox 2                                                         | chr19      | protein_coding |
| ENSG00000138002.13 | -2.4819347  | 5.2909012  | 3.06E-16   | 5.45E-15   | 9.01   | 8.64  | 2.08       | 2.13      | FT172        | intraflagellar transport 172                                                      | chr2       | protein_coding |
| ENSG00000186233.10 | 3.852801    | 1.70875086 | 9.44E-07   | 9.90E-09   | 0      | 0.02  | 0.12       | 0.14      | LCOR         | ligand dependent nuclear receptor corepressor                                     | chr10      | protein_coding |
| ENSG00000233871.1  | 1.6047608   | 1.58147586 | 1.99E-06   | 1.09E-05   | 2.64   | 2.15  | 2.88       | 10.62     | DLG5-AS1     | DLG5 antisense RNA 1                                                              | chr10      | antisense      |
| ENSG00000180279.5  | -5.102976   | -0.3043637 | 0.0003865  | 0.0148851  | 0.06   | 0.18  | 0          | 0         | MSC49522     | MSC49522                                                                          | chr19      | incRNA         |
| ENSG00000102553.12 | 0.97817439  | -0.0878699 | 0.0188973  | 0.045857   | 0      | 0     | 0          | 0         | CTC1129      | CTC1129                                                                           | chr17      | protein_coding |
| ENSG00000252123    | 3.7784495   | -1.5015709 | 3.55E-06   | 1.88E-05   | 0.01   | 0.01  | 0.17       | 0.22      | CCDC144NL    | coiled-coil domain containing 144 family, N-terminal like                         | chr19      | protein_coding |
| ENSG00000178931.4  | -1.1061155  | 8.34574255 | 0.00011894 | 0.00047064 | 313.7  | 265.9 | 191.78     | 166.55    | CYCL         | cytochrome c-1                                                                    | chr17      | protein_coding |
| ENSG00000151692.13 | 0.43149859  | 0.4191458  | 3.10E-16   | 5.58E-10   | 0.17   | 0.8   | 0.27       | 0.27      | RNF144A      | RNF144 protein 144A                                                               | chr12      | protein_coding |
| ENSG00000771119.14 | 1.0465892   | 3.75022266 | 0.0001951  | 0.00148875 | 0.98   | 1     | 2.47       | 3.01      | ANOG         | andostatin 6                                                                      | chr12      | protein_coding |
| ENSG0000025327.13  | 3.5566786   | 4.90146921 | 1.70E-21   | 4.82E-20   | 0.37   | 0.87  | 33.86      | 4.59      | PRC2         | RNF144 protein 144A                                                               | chr12      | protein_coding |
| ENSG00000186233.10 | 3.852801    | 1.70875086 | 9.44E-07   | 9.90E-09   | 0      | 0.02  | 0.12       | 0.14      | LCOR         | RNF144 protein 144A                                                               | chr12      | protein_coding |
| ENSG0000017163.11  | 3.01468035  | 5.2973633  | 4.93E-22   | 1.23E-20   | 2.93   | 3.5   | 30.23      | 19.38     | RJCAL        | fucosidase (alpha-L-1, tissue)                                                    | chr1       | protein_coding |
| ENSG00000268912.7  | 1.02524464  | 0.31654077 | 9.98E-24   | 1.36E-22   | 0      | 0     | 0          | 0         | MSF          | myosin family protein                                                             | chr19      | protein_coding |
| ENSG00000164155.5  | 1.52230361  | 0.44103895 | 2.81E-07   | 1.76E-06   | 1.1    | 0.88  | 3.56       | 4.05      | LMTK2        | lemur tyrosine kinase                                                             | chr7       | protein_coding |
| ENSG00000241222    | 4.86951858  | 1.42717114 | 2.82E-42   | 2.43E-40   | 0.4    | 0.4   | 13.17      | 18.3      | UGT1A7       | UDP-glucuronosyltransferase 1 family, polypeptide A7                              | chr2       | protein_coding |
| ENSG00000283918.15 | 0.76456105  | 1.24E-07   | 8.21E-07   | 0.14       | 0.03   | 0.14  | 0.08       | 0.13      | PTVE1B       | zinc finger PVE domain containing 1B                                              | chr2       | protein_coding |
| ENSG00000102485.8  | 3.82634103  | 0.8481804  | 1.72E-13   | 2.94E-12   | 0.07   | 0.05  | 0.61       | 1.7       | EPGN         | epithelial integrin                                                               | chr4       | protein_coding |
| ENSG0000035301.11  | -2.2477677  | 6.53731192 | 4.68E-14   | 6.73E-13   | 60.8   | 53.1  | 14.22      | 17.84     | USE1         | unconventional SNARE in the ER 1 homolog (S. cerevisiae)                          | chr19      | protein_coding |
| ENSG00000168927.7  | 1.64791985  | 1.8491385  | 8.80E-06   | 4.32E-05   | 0.38   | 0.4   | 3.7        | 4.12      | SCC5         | secretogranin 5                                                                   | chr1       | protein_coding |
| ENSG00000202198.1  | 1.3804871   | 3.99611505 | 3.53E-06   | 1.87E-05   | 16.48  | 26.71 | 10.13      | 37.6      | RN7SK        | RNA, 75k small nuclear                                                            | chr6       | misc RNA       |
| ENSG00000143318.11 | 5.6761718   | -2.6083292 | 0.0004761  | 0.00167191 | 0.1    | 0.08  | 0.12       | 0.12      | CASQ1        | calcineurin 1 (fast-twitch, skeletal muscle)                                      | chr1       | protein_coding |
| ENSG00000178425.12 | 1.5287913   | 1.9187978  | 1.24E-07   | 8.21E-07   | 0.14   | 0.03  | 0.14       | 0.08      | MTSDC1       | S-nucleotidase domain containing 1                                                | chr1       | protein_coding |
| ENSG0000012983.10  | 1.99554662  | 2.32993085 | 7.19E-10   | 6.37E-09   | 0.39   | 0.34  | 1.24       | 2.69      | MAPK4S       | mitogen-activated protein kinase kinase kinase 5                                  | chr18      | protein_coding |
| ENSG0000029986.16  | -1.062462   | 5.87077423 | 5.42E-07   | 0.02E-06   | 26.19  | 24.77 | 10.45      | 14.77     | PAM          | polyoma virus P1                                                                  | chr1       | protein_coding |
| ENSG00000263178.1  | 2.7456008   | -2.410398  | 0.00737015 | 0.01977584 | 0.14   | 0     | 0.86       | 0.36      | RP11-252K2.2 | RP11-252K2.2                                                                      | chr16      | antisense      |
| ENSG00000230797.2  | -1.0026652  | -0.3758787 | 0.0189011  | 0.04519636 | 0.3    | 0.27  | 0.11       | 0.27      | YV2          | YV2 transcription factor                                                          | chr1       | protein_coding |
| ENSG00000161328.10 | 1.4905351   | 1.7809429  | 5.74E-06   | 2.92E-05   | 0.42   | 0.4   | 1.82       | 1.82      | URC56        | uracil rich repeat containing 56                                                  | chr1       | protein_coding |
| ENSG00000102743.13 | -0.1198704  | 2.5740277  | 0.009147   | 0.00303221 | 4.32   | 3.77  | 3.01       | 2.3       | SLC25A15     | solute carrier family 25 (mitochondrial carrier; ornithine transporter) member 15 | chr13      | protein_coding |
| ENSG0000018795.13  | 2.26505432  | -1.401561  | 0.00030738 | 0.0011156  | 0      | 0.07  | 0.21       | 0.21      | ZNF385       | zinc finger protein 385C                                                          | chr17      | protein_coding |
| ENSG00000131396.1  | 1.2898981   | 0.227372   | 9.46E-16   | 1.69E-14   | 0      | 0     | 2.88       | CTD-201K1 | CTD-201K1    | chr17                                                                             | antisense  |                |
| ENSG00000185904.10 | 6.74420988  | 2.54708552 | 3.16E-45   | 3.31E-43   | 0.05   | 0.03  | 5.63       | 5.21      | UNC0389      | long intergenic non-protein coding RNA 839                                        | chr10      | incRNA         |
| ENSG0000013026.14  | -2.1741709  | 7.6910444  | 2.29E-13   | 3.06E-12   | 80.95  | 97.1  | 23.59      | 29.04     | DKC2         | dyskeratosis associated 1, dyskerin                                               | chrX       | protein_coding |
| ENSG00000245372.1  | 1.4591457   | -2.1407118 | 0.0018008  | 0.00495521 | 0.02   | 0.46  | RP11-889D3 | 0.46      | RP11-889D3   | RP11-889D3                                                                        | chr19      | incRNA         |
| ENSG00000172231.1  | -1.0661937  | 9.81381815 | 0.0020225  | 0.0076281  | 838.49 | 805.1 | 53.033     | 51.054    | DF1          | differentiation-related factor 1                                                  | chr9       | protein_coding |
| ENSG00000183744.4  | 1.0297299   | 0.3232318  | 0.0003401  | 0.00130281 | 0.01   | 0.01  | 0.01       | 0.01      | ACSC         | achete-scute factor bHLH transcription factor 2                                   | chr1       | protein_coding |
| ENSG00000274225.1  | -5.2019082  | -0.305482  | 0.0538185  | 0.0148851  | 0.17   | 0.18  | 0          | 0         | K8-68A7.1    | K8-68A7.1                                                                         | chr21      | incRNA         |
| ENSG00000168401.7  | -3.4636999  | -2.1134182 | 0.00016274 | 0.00062431 | 0.27   | 0.07  | 0.02       | 0         | IGS3         | intraflagellar transport repeat 3                                                 | chr1       | protein_coding |
| ENSG00000122970.14 | 1.4235959   | 0.411448   | 6.20E-11   | 2.56E-10   | 0.47   | 0.17  | 0.78       | 1.37      | FT172        | intraflagellar transport 172                                                      | chr2       | protein_coding |
| ENSG00000041357.14 | 1.3425429   | 5.2959328  | 3.98E-06   | 2.08E-05   | 4.74   | 5.69  | 13.8       | 21.62     | PSMA4        | prosome (prosome, macropain) subunit, alpha type, 4                               | chr15      | protein_coding |
| ENSG00000204319.4  | -2.168401   | 1.6222973  | 2.13E-10   | 2.04E-09   | 2.09   | 1.77  | 0.62       | 0.52      | PRRT1        | proline-rich transmembrane protein 1                                              | chr1       | protein_coding |
| ENSG00000131740.9  | 1.7698622   | 1.7342345  | 1.76E-05   | 8.15E-05   | 2.38   | 0.41  | 0.25       | 0.13      | CTPS         | CTP transcription factor 5, p130-binding                                          | chr1       | protein_coding |
| ENSG00000262974.1  | 2.22511392  | 1.2031794  | 1.30E-09   | 1.11E-08   | 0.52   | 0.3   | 2.35       | 2.82      | RP11-81701.1 | RP11-81701.1                                                                      | chr15      | incRNA         |
| ENSG0000063933.14  | 1.4116536   | 1.84363758 | 5.98E-24   | 1.91E-22   | 0.01   | 0.03  | 0.39       | 0.46      | MYO9A        | myosin IXA                                                                        | chr15      | protein_coding |
| ENSG00000133453.9  | 1.8905403   | 0.8297742  | 0.0003401  | 0.00130281 | 0.01   | 0.02  | 0.47       | 0.62      | CTC1129      | CTC1129                                                                           | chr17      | protein_coding |
| ENSG00000189702.12 | -4.7350496  | -1.897013  | 1.01E-06   | 5.80E-06   | 0.36   | 0.15  | 0.01       | 0         | SLA          | SrC-like adaptor                                                                  | chr8       | protein_coding |
| ENSG00000167131.15 | -1.1190109  | 1.8777526  | 0.000481   | 0.0016991  | 1.33   | 0.96  | 0.81       | 0.6       | CDCC103      | coiled-coil domain containing 103                                                 | chr17      | protein_coding |
| ENSG0000012788.8   | 1.4514953   | 1.9151235  | 8.03E-09   | 2.54E-07   | 1.47   | 1.52  | 1.49       | 0.67      | TNFRSF25     | tumor necrosis factor receptor superfamily, member 25                             | chr17      | protein_coding |
| ENSG00000196842.4  | 2.1456259   | 0.47548924 | 7.93E-08   | 5.05E-07   | 0.14   | 0.11  | 0.05       | 0.04      | KRCC2        | X-ray repair complementing defective repair in Chinese hamster cells 2            | chr7       | protein_coding |
| ENSG00000231074.7  | 1.0297299   | 0.3232318  | 0.0003401  | 0.00130281 | 0.01   | 0.01  | 0.01       | 0.01      | ACSC         | achete-scute factor bHLH transcription factor 2                                   | chr1       | protein_coding |
| ENSG00000145736.13 | 2.15981553  | 0.9029394  | 7.66E-09   | 5.97E-08   | 0.13   | 0.11  | 0.56       | 0.83      | CTP242       | generic transcription factor IIH, polypeptide 2, 44kDa                            | chr15      | protein_coding |
| ENSG00000124839.11 | 1.31429475  | 1.60067015 | 5.21E-05   | 0.0022168  | 0.69   | 0.68  | 2.54       | 2.09      | RAB17        | RAB17, member RAS oncogene family                                                 | chr1       | protein_coding |
| ENSG00000138018.9  | 1.0297299   | 0.3232318  | 0.0003401  | 0.00130281 | 0.01   | 0.02  | 0.47       | 0.62      | CTC1129      | CTC1129                                                                           | chr17      | protein_coding |
| ENSG00000144591.16 | -1.0043938  | 5.57883458 | 0.00032138 | 0.0116429  | 26.41  | 25.07 | 18.1       | 15.19     | EMGPA        | GDP-mannose cyclohydroxylase A                                                    | chr19      | protein_coding |
| ENSG00000467635.5  | 3.0738842   | -2.021187  | 0.0009481  | 0.0312103  | 0      | 0.02  | 0.16       | 0.13      | RGMB-AS1     | RGMB antisense RNA 1                                                              | chr1       | antisense      |
| ENSG00000151116.15 | 1.4905351   | 1.7809429  | 5.74E-06   | 2.92E-05   | 0.42   |       |            |           |              |                                                                                   |            |                |

|                    |            |            |            |            |         |         |         |          |                        |                                                                                              |                |                |
|--------------------|------------|------------|------------|------------|---------|---------|---------|----------|------------------------|----------------------------------------------------------------------------------------------|----------------|----------------|
| ENSG000001917129   | -12854239  | 3.8041332  | 3.496-73   | 1.676-70   | 13.76   | 11.33   | 0       | 0        | MACGEA6                | melanoma antigen family A6                                                                   | chrX           | protein_coding |
| ENSG00000184194.5  | 1.715671   | 1.686135   | 1.88E-35   | 1.18E-35   | 0.46    | 0.46    | 0       | 0        | GP17L3                 | G protein-coupled receptor 173                                                               | chr10          | protein_coding |
| ENSG00000138160.5  | 2.4074532  | 2.60718937 | 1.86E-13   | 2.52E-12   | 0.38    | 0.25    | 1.53    | 296      | KIF11                  | kinesin family member 11                                                                     | chr10          | protein_coding |
| ENSG0000027764.1   | 1.64192656 | -0.001471  | 0.00011574 | 0.00046621 | 1.36    | 1.23    | 3.71    | 7.1      | RP11-318E3...          | ...                                                                                          | chr10          | lncRNA         |
| ENSG00000124498.10 | 2.3445601  | 0.007819   | 0.00004629 | 0.00046621 | 0.49    | 0.37    | 1.32    | 29745    | ZNF435                 | zinc finger protein 435                                                                      | chr10          | protein_coding |
| ENSG00000164241.12 | 1.34283011 | 1.00485318 | 0.00011761 | 0.00058571 | 0.17    | 0.1     | 0.41    | 0.5      | C5orf63                | chromosome 5 open reading frame 63                                                           | chr10          | protein_coding |
| ENSG00000169624.2  | 1.55989025 | 0.21772149 | 0.00013052 | 0.00051325 | 0.11    | 0.15    | 0.47    | 0.55     | TAS1R3                 | taste receptor, type 1, member 3                                                             | chr10          | protein_coding |
| ENSG00000198025.9  | 1.5870763  | 0.7035372  | 9.59E-07   | 5.53E-06   | 52.49   | 52.49   | 2232    | ATG9A    | autophagy related 9    | chr2                                                                                         | protein_coding |                |
| ENSG00000088517.15 | -6.8940438 | 6.03347197 | 2.74E-72   | 1.28E-69   | 67.61   | 57.23   | 0.82    | 0.58     | L32                    | interleukin 32                                                                               | chr16          | protein_coding |
| ENSG00000279781.1  | 1.86676151 | 4.83472677 | 3.87E-10   | 3.59E-09   | 0.04    | 0.04    | 0.2     | 0.16     | chr22-38.28            | ...                                                                                          | chr22          | lncRNA         |
| ENSG00000259501.1  | 1.83037339 | 0.17038994 | 2.00E-06   | 1.10E-05   | 0.36    | 0.36    | 1.29    | 714729.1 | TFAP2A antisense RNA 1 | chr6                                                                                         | antisense      |                |
| ENSG00000148303.15 | -1.755152  | 11.0329101 | 1.85E-09   | 1.56E-08   | 3117.06 | 2754.53 | 1151.04 | RP17A    | ribosomal protein L7a  | chr9                                                                                         | protein_coding |                |
| ENSG00000228271.1  | 1.1863949  | 0.41016368 | 3.74E-11   | 5.44E-13   | 0.35    | 0.53    | 0.04    | 0.08     | RP11-276H1...          | ...                                                                                          | chr10          | lncRNA         |
| ENSG00000214595.10 | 2.37321142 | -0.011025  | 1.22E-07   | 8.08E-07   | 0.04    | 0.02    | 0.12    | 0.27     | EMU6                   | echinoderm microtubule associated protein like 6                                             | chr2           | protein_coding |
| ENSG00000254093.7  | -1.0263581 | 4.56699603 | 0.00043208 | 0.00152996 | 16      | 17.3    | 1128    | 1047     | PNK1                   | PNP/TERF1 interacting, telomerase inhibitor 1                                                | chr2           | protein_coding |
| ENSG00000131271.1  | -1.2357689 | -0.0915486 | 0.0007225  | 0.0085393  | 1.74    | 1.33    | 1.35    | 0.18     | FAM1179B               | family with sequence similarity 179, member B                                                | chr12          | protein_coding |
| ENSG00000163347.5  | -2.3570192 | 1.3941659  | 1.52E-11   | 1.67E-10   | 0.83    | 1.21    | 0.16    | 0.37     | CLDN1                  | claudin 1                                                                                    | chr3           | protein_coding |
| ENSG00000176383.8  | 2.4067359  | 6.0336251  | 1.36E-09   | 1.16E-08   | 0.09    | 0.07    | 0.58    | 0.55     | SNRNT4                 | UDP-GlcNAc6S Gal beta-1-3-N-acetylglucosaminyltransferase 4                                  | chr12          | protein_coding |
| ENSG00000198718.11 | 5.55654758 | -0.768464  | 3.91E-12   | 4.59E-11   | 0       | 0       | 0.15    | 0.18     | FAM1179B               | family with sequence similarity 179, member B                                                | chr12          | protein_coding |
| ENSG00000243725.5  | -1.0377549 | 0.3277798  | 0.0068257  | 0.01870545 | 0.57    | 0.53    | 0.37    | 0.34     | TYC4                   | tetrahydropteridine reduct domain 4                                                          | chr1           | protein_coding |
| ENSG00000116649.8  | -1.5577969 | 1.74246056 | 8.55E-08   | 5.80E-07   | 10.78   | 173.06  | 8.35    | 7167     | SRM                    | serratia synthase                                                                            | chr1           | protein_coding |
| ENSG0000016994.11  | 3.10394988 | -0.382229  | 1.04E-09   | 9.04E-09   | 0.03    | 0.01    | 0.21    | 0.34     | BNCL                   | basophilic nucleoside                                                                        | chr15          | protein_coding |
| ENSG00000147940.3  | -4.2559946 | 0.4794033  | 6.64E-20   | 1.59E-18   | 0.22    | 0.37    | 0       | 0.04     | CGNL1                  | cingulin-like 1                                                                              | chr15          | protein_coding |
| ENSG0000012118.16  | -1.1496306 | 6.94275727 | 6.40E-05   | 0.00026805 | 156.12  | 186.05  | 102.42  | 102.52   | MCB3                   | microchromosome maintenance complex component 3                                              | chr6           | protein_coding |
| ENSG00000174462.13 | 2.6277077  | -0.1527476 | 3.70E-09   | 3.01E-08   | 0.45    | 0.66    | 0.11    | 0.12     | DJLC                   | della-like 2 homology (Drosophila)                                                           | chr1           | protein_coding |
| ENSG00000234678.1  | -8.954126  | -0.0746533 | 6.39E-22   | 1.78E-20   | 1.39    | 147     | 0       | 0        | RP11-465N4...          | ...                                                                                          | chr1           | antisense      |
| ENSG00000234596.6  | 4.9597347  | 3.10350551 | 4.68E-19   | 3.42E-17   | 3.14    | 2.86    | 0.13    | 0.14     | ZMIZ1-AS1              | ZMIZ1 antisense RNA 1                                                                        | chr10          | antisense      |
| ENSG00000165067.7  | -0.0772296 | -1.7605703 | 1.18E-08   | 8.76E-08   | 0.14    | 0.15    | 0       | 0        | DRGX                   | dorsal root ganglia homeobox                                                                 | chr10          | protein_coding |
| ENSG0000025362.9   | -81.48869  | 1.37728289 | 4.22E-38   | 2.89E-36   | 12.03   | 7.32    | 0       | 0.07     | MT1A                   | metallothionein 1A                                                                           | chr16          | protein_coding |
| ENSG00000190621.12 | 1.0127271  | 8.18008522 | 0.0001459  | 0.00143839 | 81.53   | 102.44  | 57.54   | 63.94    | PABPC4                 | poly(A) binding protein, cytoplasmic 4 (inducible form)                                      | chr1           | protein_coding |
| ENSG00000145604.14 | 1.24102787 | 4.73758984 | 2.22E-05   | 0.00010109 | 3.55    | 3.12    | 8.36    | 12.76    | SKP2                   | S-phase kinase-associated protein 2, E3 ubiquitin protein ligase                             | chr17          | protein_coding |
| ENSG00000265121.1  | 6.04467832 | -2.3656018 | 4.74E-05   | 0.00020301 | 0       | 0       | 0.48    | 0.41     | RP11-285E3...          | ...                                                                                          | chr17          | lncRNA         |
| ENSG00000240922.4  | 1.11416106 | 7.0592573  | 0.00010851 | 0.00043871 | 67.13   | 59.1    | 39.15   | 36.23    | UNC113                 | ubiquitin-ubiquitin c-ubiquitin reductase assembly factor 3                                  | chr10          | protein_coding |
| ENSG00000139731.4  | 2.0855688  | -0.1973174 | 0.00956883 | 0.02497948 | 0.04    | 0.12    | 0.59    | 0.39     | ZNF341-AS1             | ZNF341 antisense RNA 1                                                                       | chr10          | antisense      |
| ENSG00000172918.13 | -1.738702  | 5.6608655  | 7.43E-05   | 7.52E-43   | 18.13   | 17.51   | 0.95    | 0.81     | C1QTNF1                | C1q and tumor necrosis factor related protein 1                                              | chr10          | protein_coding |
| ENSG00000125961.13 | 1.2598613  | 1.1943153  | 0.0001095  | 0.00010049 | 3.08    | 3.08    | 1.6     | 0.86     | PCDH15                 | protocadherin beta 15                                                                        | chr5           | protein_coding |
| ENSG00000113248.5  | -1.4843497 | 0.30555136 | 1.78E-17   | 3.01E-16   | 0.41    | 0.53    | 0.06    | 0.01     | PCDH15                 | protocadherin beta 15                                                                        | chr5           | protein_coding |
| ENSG00000234986.3  | 4.5957347  | 1.9844764  | 3.70E-07   | 1.57E-06   | 1.63    | 2.49    | 115.41  | 68.4     | ENTL1                  | RNA, TSL cytoplasmic 1                                                                       | chr14          | lncRNA         |
| ENSG00000105599.10 | -1.9849274 | 1.63351042 | 3.70E-09   | 3.01E-08   | 1.39    | 1.19    | 0.44    | 0.43     | PLEKHA4                | pleckstrin homology domain containing, family A (phosphoinositide binding specific) member 4 | chr19          | protein_coding |
| ENSG00000254105.2  | 2.6932011  | -1.086078  | 7.10E-06   | 3.54E-05   | 0.05    | 0.03    | 0.32    | 0.35     | AZM-AS1                | AZM antisense RNA 1 (head to head)                                                           | chr12          | antisense      |
| ENSG00000173221.1  | -1.045493  | 0.03045    | 0.00058249 | 0.0028478  | 0.65    | 0.65    | 0       | 0        | HIST1H2AK              | histone variant H2AK                                                                         | chr1           | protein_coding |
| ENSG000001311897.6 | 1.0894719  | 3.8110335  | 0.00024079 | 0.00089626 | 2.14    | 2.48    | 1.1     | 9.11     | SERNIC1                | sarcomere incorporator 1                                                                     | chr19          | protein_coding |
| ENSG00000253034.5  | 4.0074754  | -2.0228487 | 3.06E-05   | 0.00013563 | 0.03    | 0       | 0.54    | 0.39     | C13orf81               | chromosome 13 open reading frame 81                                                          | chr19          | protein_coding |
| ENSG00000164482.9  | 2.441635   | 7.91844636 | 1.18E-05   | 5.64E-05   | 38.74   | 40.19   | 251.65  | 163.15   | RP13                   | ribosomal protein L30                                                                        | chr19          | protein_coding |
| ENSG00000175591.10 | -4.746248  | 2.90455602 | 5.73E-37   | 3.67E-35   | 4.52    | 3.67    | 0.12    | 0.28     | PRYR2                  | purine nucleoside P2Y G-protein coupled 2                                                    | chr11          | protein_coding |
| ENSG00000232847.7  | -1.4866764 | 0.2504153  | 0.00011986 | 0.00074743 | 0.36    | 0.5     | 0.15    | 0.25     | TNPOCS                 | translocator domain containing 5 (endoplasmic reticulum)                                     | chr6           | protein_coding |
| ENSG0000018404.15  | 1.5054701  | 0.418108   | 5.85E-09   | 2.98E-09   | 1.63    | 2.49    | 0.16    | 1.17     | SP140L                 | SP140 nuclear body protein-like 1                                                            | chr10          | protein_coding |
| ENSG00000170871.17 | 1.07724505 | 2.1698846  | 0.00066239 | 0.00226462 | 0.39    | 0.47    | 0.96    | 1.44     | MTSS1                  | metastasis suppressor 1                                                                      | chr6           | protein_coding |
| ENSG00000211997.1  | -1.454995  | 1.1840101  | 2.40E-07   | 1.57E-06   | 0.15    | 0.15    | 0       | 0        | RP11-970J12            | ...                                                                                          | chr15          | antisense      |
| ENSG00000137311.11 | -3.3682502 | 7.94580806 | 2.95E-27   | 1.19E-25   | 29.11   | 24.5    | 3.63    | 3.37     | IER3                   | immediate early response 3                                                                   | chr6           | protein_coding |
| ENSG00000165244.6  | 2.19966214 | 1.66071157 | 2.26E-10   | 2.15E-09   | 0.21    | 0.28    | 1.96    | 2.97     | ZNF367                 | zinc finger protein 367                                                                      | chr1           | protein_coding |
| ENSG00000232566.7  | 2.5545044  | 0.1841097  | 1.98E-06   | 1.46E-07   | 0.17    | 0.17    | 11.4    | 5.4      | SH3BP3                 | SH3 domain protein host gene 15                                                              | chr17          | protein_coding |
| ENSG00000198434.14 | -1.3289008 | 2.7934216  | 1.50E-05   | 7.08E-05   | 2.72    | 2.33    | 1.3     | 1.39     | ARID5A                 | AT rich interactive domain 5A (MRF1-like)                                                    | chr2           | protein_coding |
| ENSG00000101236.15 | 1.4904777  | 4.83295216 | 4.04E-07   | 2.48E-06   | 1.55    | 1.6     | 5.92    | 5.87     | RNF24                  | ring finger protein 24                                                                       | chr20          | protein_coding |
| ENSG00000134262.11 | 1.3452486  | 0.16721188 | 0.00010201 | 0.00111019 | 0.63    | 0.46    | 4.93    | 4.93     | ARAF4                  | adenosine related protein complex 4, beta 1 subunit                                          | chr1           | protein_coding |
| ENSG00000072840.11 | 1.1668473  | 2.6145485  | 1.05E-55   | 2.11E-53   | 1.32    | 1.67    | 0       | 0        | EVCC                   | Ellis van Creveld protein                                                                    | chr1           | protein_coding |
| ENSG00000198147.7  | 2.3097544  | 3.385728   | 1.77E-13   | 2.40E-12   | 0.26    | 0.3     | 0.62    | 2        | ARHGFP2                | Rho guanine nucleotide exchange factor and GEF12                                             | chr11          | protein_coding |
| ENSG00000161131.9  | -1.40452   | 0.84837222 | 2.41E-16   | 4.13E-15   | 0.43    | 0.13    | 0.61    | 0.43     | CTSC                   | cathepsin C                                                                                  | chr1           | protein_coding |
| ENSG00000135598.3  | 3.0263418  | -2.6615909 | 0.0043894  | 0.02469931 | 0.07    | 0       | 1.02    | 0.27     | HIST2H3D               | histone 2.3, H3d                                                                             | chr1           | protein_coding |
| ENSG00000143131.8  | 0.2364699  | 1.1943153  | 0.0001095  | 0.00010049 | 3.08    | 3.08    | 1.6     | 0.86     | PCDH15                 | protocadherin beta 15                                                                        | chr5           | protein_coding |
| ENSG00000153633.11 | 1.4823509  | 1.52058298 | 1.10E-05   | 5.31E-05   | 0.37    | 0.31    | 0.75    | 1.78     | UNC00467               | long interspersed non-protein coding RNA-467                                                 | chr1           | lncRNA         |
| ENSG0000013386.16  | -6.2014387 | 2.3667268  | 8.29E-44   | 7.88E-42   | 1.83    | 1.55    | 0.15    | 0.04     | GAUNT15                | polyketide N-acetylglucosaminyltransferase 15                                                | chr3           | protein_coding |
| ENSG0000018454.15  | -2.4401033 | 1.63351042 | 3.70E-09   | 3.01E-08   | 1.39    | 1.19    | 0.44    | 0.43     | ADU4A2                 | adenosine related protein complex 4, beta 2 subunit                                          | chr15          | protein_coding |
| ENSG00000139697.10 | 2.0077832  | 3.3697705  | 6.15E-11   | 6.31E-10   | 0.26    | 0.46    | 1.54    | 2.32     | SNNO1                  | strawberry notch homology 1 (Drosophila)                                                     | chr12          | protein_coding |
| ENSG00000253619.1  | -4.80698   | -3.2210842 | 0.01888673 | 0.04519567 | 0.09    | 0.1     | 0       | 0        | RP11-881M1...          | ...                                                                                          | chr11          | antisense      |
| ENSG00000254911.3  | 3.4405368  | 4.5345608  | 1.18E-05   | 7.2E-24    | 38.74   | 40.19   | 86.09   | 68.4     | SCARNA9                | small Cajal body-specific RNA 9                                                              | chr1           | antisense      |
| ENSG00000191319.15 | -3.9541121 | 3.7299205  | 1.36E-31   | 6.75E-30   | 2.87    | 3.78    | 0.23    | 0.35     | TIP2                   | tight junction protein 2                                                                     | chr9           | protein_coding |
| ENSG0000010130.8   | -1.3472945 | 5.71592002 | 3.60E-06   | 1.90E-05   | 13.33   | 11.38   | 0.71    | 0.62     | NCSL1                  | neuronal calcium sensor 1                                                                    | chr9           | protein_coding |
| ENSG00000120675.5  | 1.5679763  | 1.65827241 | 5.81E-07   | 4.58E-06   | 0.46    | 0.65    | 0       | 0.01     | DNAJC15                | DnaJ (Hsp40) homolog, subfamily C, member 15                                                 | chr10          | protein_coding |
| ENSG00000184922.12 | -1.5258346 | 6.1732853  | 1.60E-07   | 8.02E-06   | 31.4    | 29.35   | 14.17   | 13.81    | FMMN1                  | formin-like 1                                                                                | chr1           | protein_coding |
| ENSG00000253619.1  | 1.4076146  | 1.70201219 | 1.75E-05   | 1.04E-05   | 2.6     | 2.96    | 8.93    | 7.52     | HOCX-AS1               | HOCX cluster antisense RNA 1                                                                 | chr17          | antisense      |
| ENSG00000132597.12 | 1.545386   | 1.9121319  | 1.13E-02   | 1.42E-02   | 0.57    | 0       | 0.08    | 0.28     | C2orf1                 | collagen and calcaion binding EGF domains 1                                                  | chr1           | protein_coding |
| ENSG00000102172.14 | -1.4855505 | 7.12846313 | 3.16E-07   | 1.97E-06   | 85.43   | 96.42   | 50.77   | 50.77    | SMS                    | spermine synthase                                                                            | chr1           | protein_coding |
| ENSG00000251022.2  | 0.5949608  | 1.9459608  | 0.0001095  | 0.00010049 | 3.08    | 3.08    | 1.6     | 0.86     | PCDH15                 | protocadherin beta 15                                                                        | chr5           | protein_coding |
| ENSG0000015542.10  | 2.36879893 | -1.1464505 | 4.93E-05   | 0.0002108  | 0.09    | 0.02    | 0.41    | 0.34     | SETD9                  | SET domain containing 9                                                                      | chr1           | protein_coding |
| ENSG00000228646.6  | 6.6602407  | -1.91328   | 6.25E-07   | 3.72E-06   | 0       | 0       | 0.04    | 0.06     | RP3-399.15             | ...                                                                                          | chr5           | antisense      |
| ENSG00000198984.2  | -4.9710484 | 13.7218289 | 2.04E-06   | 1.96E-07   | 2047.9  | 3211.87 | 1093.65 | 878.66   | MT-CO1                 | mitochondrial encoded cytochrome c oxidase I                                                 | chr1           | protein_coding |
| ENSG00000256551.8  | 3.3362098  | 2.5846135  | 5.90E-22   | 1.64E-20   | 0.05    | 0.08    | 0.79    | 1.08     | TAKO1                  | TAD kinase 1                                                                                 | chr17          | protein_coding |
| ENSG00000270185.1  | 2.0386209  | -1.2141602 | 0.00040219 | 0.0014331  | 0.05    | 0.35    | 0.51    | 1.63     | RP11-167P1...          | ...                                                                                          | chr16          | sense_intronic |
| ENSG00000114514.14 | 1.212894   | 0.41801029 | 9.91E-05   | 0.00036189 | 0.11    | 0.11    | 0.58    | 0.83     | PNCL3                  | proline-rich nuclear protein 3                                                               | chr1           | protein_coding |
| ENSG00000168116.12 | 4.579090   |            |            |            |         |         |         |          |                        |                                                                                              |                |                |

|                    |            |            |            |            |          |        |       |        |            |                                                                                |                                       |                    |                |
|--------------------|------------|------------|------------|------------|----------|--------|-------|--------|------------|--------------------------------------------------------------------------------|---------------------------------------|--------------------|----------------|
| ENSG00000164342.11 | 6.7785862  | -1.8168276 | 2.246      | -0.7       | 1.42E-06 | 0      | 0     | 0.002  | 0.12       | TLR3                                                                           | tol-like receptor 3                   | chr4               | protein_coding |
| ENSG0000010419.13  | 1.5559599  | -2.198488  | 1.27E-09   | 0.7        | 2.8E-05  | 176.1  | 57.64 | 5.84   | 58.14      | NDRG1                                                                          | N-myc downstream regulated 1          | chr6               | protein_coding |
| ENSG0000013367.13  | 2.6381347  | 2.51588451 | 2.43E-15   | 4.01E-14   | 0.1      | 0.1    | 0.16  | 0.71   | 1.42       | ATP13A3                                                                        | ATPase type 13A3                      | chr7               | protein_coding |
| ENSG0000018575.7   | 1.3512707  | -0.767203  | 0.00520073 | 0.0146648  | 0.1      | 0.06   | 0.32  | 0.02   | 0.02       | NKX9                                                                           | neuroxin 3                            | chr17              | protein_coding |
| ENSG0000016338.13  | 1.6136388  | 2.051478   | 1.41E-07   | 0.00000000 | 0.1      | 0.1    | 0.15  | 0.74   | 1.54       | ZNF761                                                                         | zinc finger protein 761               | chr19              | protein_coding |
| ENSG0000012569.1   | -4.2389387 | -1.5497813 | 2.58E-08   | 1.88E-07   | 0.59     | 1.15   | 0     | 0      | 0          | RP11-256C3                                                                     | ---                                   | chr2               | antisense      |
| ENSG0000017127.6   | -4.3675588 | 2.5403789  | 2.57E-31   | 1.20E-29   | 5.29     | 4.93   | 0.42  | 0.25   | 0.25       | TMEM37                                                                         | transmembrane protein 37              | chr6               | protein_coding |
| ENSG0000016494.15  | -2.159848  | 3.5544406  | 0.0053196  | 0.01522273 | 0.1      | 0.1    | 0.1   | 0.1    | 0.02       | FNDC1                                                                          | flecainex beta II domain containing 1 | chr2               | protein_coding |
| ENSG0000076716.8   | 0.0248052  | 3.5544406  | 7.87E-61   | 2.05E-58   | 0.01     | 0.02   | 0.417 | 5.93   | GP4        | glypican 4                                                                     | chr6                                  | protein_coding     |                |
| ENSG0000015925.6   | 2.18258471 | 0.6717245  | 1.32E-08   | 9.91E-08   | 0.14     | 0.07   | 0.8   | 0.15   | ACTC1      | actin, alpha, cardiac muscle 1                                                 | chr15                                 | protein_coding     |                |
| ENSG0000013584.15  | 1.4983953  | 1.464646   | 0.00000000 | 0.00000000 | 0.1      | 0.1    | 0.72  | 0.72   | FAM129A    | family with sequence similarity 129, member A                                  | chr19                                 | protein_coding     |                |
| ENSG0000026186.4   | 2.4796798  | -1.456984  | 0.0017647  | 0.00080080 | 0        | 0.26   | 1.05  | 0.89   | RP11-671A2 | ---                                                                            | chr16                                 | crossed transcript |                |
| ENSG0000013636.13  | -4.9771048 | 3.983552   | 3.56E-07   | 3.03E-40   | 5.12     | 1.7    | 0.16  | 0.33   | MYO1C      | myosin I                                                                       | chr7                                  | protein_coding     |                |
| ENSG0000011281.13  | 3.5476323  | 2.1952136  | 1.86E-22   | 5.38E-21   | 0.05     | 0.08   | 0.77  | 1.25   | ERBB2P     | erbB2 interacting protein                                                      | chr11                                 | protein_coding     |                |
| ENSG0000026508.15  | -2.5094034 | 8.2236201  | 6.38E-17   | 1.20E-15   | 64.96    | 69.44  | 14.22 | 17.3   | CD44       | CD44 molecule (Indian blood group)                                             | chr15                                 | protein_coding     |                |
| ENSG0000017245.12  | 2.11136837 | 1.4998872  | 1.72E-05   | 1.14E-09   | 0.13     | 0.21   | 0.94  | 1.02   | STARTD5    | SAAR-related lipid transfer (START) domain containing 5                        | chr19                                 | protein_coding     |                |
| ENSG0000011959.15  | 1.1345909  | 3.91162176 | 1.19E-05   | 0.0003179  | 4.33     | 3.69   | 2.25  | 2.43   | DCAF4      | DD81 and CUL4 associated factor 4                                              | chr14                                 | protein_coding     |                |
| ENSG0000018549.11  | -1.1182496 | 6.0992626  | 0.00010825 | 0.00043256 | 12.72    | 15.57  | 8.74  | 8.6    | CLISF52    | chromosome 15 open reading frame 52                                            | chr15                                 | protein_coding     |                |
| ENSG0000016461.15  | 3.9389899  | 1.1557287  | 5.48E-18   | 1.13E-16   | 0.12     | 0.03   | 1.17  | 1.09   | SFR        | Soft transcription factor                                                      | chr7                                  | protein_coding     |                |
| ENSG0000010205.8   | -2.3898882 | 0.8183716  | 1.68E-10   | 1.62E-09   | 0.34     | 0.49   | 0.1   | 0.11   | KCNQ1      | potassium channel, voltage-activated Shal related subfamily D, member 1        | chr4                                  | protein_coding     |                |
| ENSG0000019859.9   | 1.23797475 | 2.6120776  | 6.48E-05   | 0.0027159  | 0.27     | 0.26   | 0.74  | 0.93   | LRBA       | PLP-responsive vesicle trafficking, beach and anchor domain containing         | chr4                                  | protein_coding     |                |
| ENSG0000014759.4   | 1.97149351 | -2.886978  | 0.0038165  | 0.0148851  | 0        | 0.05   | 0.02  | 0.05   | EVX2       | even-skipped homeobox 2                                                        | chr2                                  | protein_coding     |                |
| ENSG00000204528.3  | 1.52664237 | -1.5660914 | 0.0123465  | 0.03155686 | 0.18     | 0.19   | 0.92  | 0.95   | PSORS1C3   | soriasis susceptibility 1 candidate 3 (non-protein coding)                     | chr7                                  | sense_intronic     |                |
| ENSG0000019636.7   | 1.4665094  | -0.382982  | 0.0011746  | 0.00369419 | 0.15     | 0.12   | 0.02  | 0.1    | ACN4       | ---                                                                            | chr6                                  | protein_coding     |                |
| ENSG00000204249.9  | 1.46597971 | 3.403686   | 1.72E-06   | 9.38E-06   | 0.17     | 0.17   | 0.17  | 2.54   | MEI2T      | mediator complex subunit 17                                                    | chr7                                  | protein_coding     |                |
| ENSG0000026768.11  | -1.1323041 | 5.5321988  | 9.39E-05   | 0.00037948 | 46.56    | 46.94  | 34.01 | 22.53  | TMEM17B    | translocase of inner mitochondrial membrane 17 homolog B (yeast)               | chr1                                  | protein_coding     |                |
| ENSG00000116359.9  | 1.4880381  | 3.4012156  | 9.31E-07   | 5.29E-06   | 0.33     | 0.41   | 0.1   | 1.53   | AKR1L      | ash1 (absent, small, or homeotic)-like (Drosophila)                            | chr1                                  | protein_coding     |                |
| ENSG0000026223.4   | 3.43587304 | 1.0638999  | 7.48E-13   | 9.50E-12   | 0.03     | 0.02   | 0.26  | 0.51   | ZNF130     | zinc finger protein 130                                                        | chr12                                 | protein_coding     |                |
| ENSG0000015686.14  | -1.6327686 | 6.6370258  | 2.26E-08   | 1.64E-07   | 22.82    | 24.06  | 9.86  | 10.28  | FBR5       | fibrinogen                                                                     | chr16                                 | protein_coding     |                |
| ENSG0000018347.11  | 2.1876137  | 3.5057278  | 3.56E-13   | 3.41E-12   | 21.57    | 18.53  | 5.84  | 5.83   | TRIO2      | third prime repeat exonuclease 2                                               | chr1                                  | protein_coding     |                |
| ENSG0000013859.8   | -6.9372636 | 2.6139175  | 3.66E-49   | 4.77E-47   | 3.05     | 2.26   | 0.03  | 0.02   | ANGPTL2    | angiopoietin-like 2                                                            | chr9                                  | protein_coding     |                |
| ENSG000001287145   | 10.9568763 | 1.9577039  | 2.53E-44   | 2.50E-42   | 0        | 0      | 3.17  | 0.47   | HOKO1D3    | homeobox D13                                                                   | chr12                                 | protein_coding     |                |
| ENSG0000018607.11  | 1.4415617  | 2.4333741  | 2.45E-51   | 7.00E-49   | 0.18     | 0.18   | 0.06  | 0.42   | 3.23       | SDCC28                                                                         | synaptosomal complex subunit 2        | chr20              | protein_coding |
| ENSG00000150310.14 | 1.8133276  | 0.6799553  | 0.00098837 | 0.0023143  | 0.18     | 0.06   | 0.42  | 0.3    | FAM124A    | family with sequence similarity 124A                                           | chr13                                 | protein_coding     |                |
| ENSG0000075739.12  | 1.14873772 | 5.6362486  | 7.40E-05   | 0.00030387 | 8.99     | 10.01  | 23.25 | 33.11  | ACAT1      | acyl-CoA acyltransferase 1                                                     | chr11                                 | protein_coding     |                |
| ENSG0000015272.15  | 0.5054861  | 1.684428   | 1.57E-07   | 1.02E-05   | 0.69     | 0.06   | 0     | 0.02   | SCOR3      | SCOR domain containing 3                                                       | chr17                                 | protein_coding     |                |
| ENSG0000017892.5   | 2.7473885  | -1.0417457 | 3.62E-06   | 1.91E-05   | 0.07     | 0      | 0.17  | 0.46   | KHLH11     | kelch-like family member 11                                                    | chr17                                 | protein_coding     |                |
| ENSG0000026559.13  | 3.901713   | 1.584132   | 1.75E-12   | 1.02E-12   | 0.13     | 0.13   | 0.13  | 0.2    | MAP2K2     | mitogen-activated protein kinase kinase 2                                      | chr1                                  | protein_coding     |                |
| ENSG00000135541.19 | 1.77557306 | 0.56357812 | 3.89E-06   | 2.02E-05   | 0.11     | 0.03   | 0.32  | 0.32   | AHH1       | Abelson helper integration site 1                                              | chr17                                 | protein_coding     |                |
| ENSG00000111530.11 | 1.61962117 | 1.5797043  | 1.66E-07   | 1.08E-06   | 0.25     | 0.29   | 0.74  | 1.5    | CAND1      | CAN1-associated and neddylation-dissociated 1                                  | chr12                                 | protein_coding     |                |
| ENSG0000026455.11  | 1.8038666  | 2.5634538  | 2.23E-07   | 9.18E-05   | 0.12     | 0.3    | 2.98  | 0.4    | COLGAS     | colicin A5                                                                     | chr14                                 | protein_coding     |                |
| ENSG00000114942.12 | -1.4663376 | 9.4456589  | 4.18E-07   | 8.76E-06   | 739.16   | 744.03 | 322.5 | 394.52 | EIF2B2     | eukaryotic translation elongation factor 1 beta 2                              | chr1                                  | protein_coding     |                |
| ENSG0000018520.3   | -6.880294  | -1.584317  | 1.35E-07   | 2.67E-07   | 0.32     | 0.21   | 0.2   | 0      | GIBS       | gap junction protein, beta 5, SL110A                                           | chr1                                  | protein_coding     |                |
| ENSG0000014724.9   | -1.4415617 | 2.4333741  | 2.45E-51   | 7.00E-49   | 0.18     | 0.18   | 0.06  | 0.42   | 3.23       | SDCC28                                                                         | synaptosomal complex subunit 2        | chr20              | protein_coding |
| ENSG0000013567.10  | 1.08891344 | 4.4685243  | 0.00019845 | 0.00050524 | 1.5      | 1.86   | 39.1  | 5.65   | CPM        | carboxypeptidase M                                                             | chr12                                 | protein_coding     |                |
| ENSG0000016291.9   | 1.6369866  | 1.0119707  | 4.56E-06   | 2.37E-05   | 0.16     | 0.19   | 0.68  | 0.78   | FWW5       | RNA-3' poly(A) binding protein 5                                               | chr2                                  | protein_coding     |                |
| ENSG0000015456.16  | 1.7463824  | 2.678296   | 1.05E-05   | 7.03E-00   | 0.1      | 0.1    | 1.25  | 0.01   | SCOR3B     | scorin and SH3 domain containing 2                                             | chr19                                 | protein_coding     |                |
| ENSG00000164778.4  | 5.27991584 | 2.7312449  | 1.42E-38   | 1.01E-36   | 0.07     | 0.08   | 3.67  | 441    | EN2        | engaged homeobox 2                                                             | chr7                                  | protein_coding     |                |
| ENSG00000156304.13 | 1.1843787  | 3.6389849  | 1.05E-05   | 0.0007945  | 22.98    | 23.58  | 1.33  | 23.14  | SCAF4      | SR-related CTD-associated factor 4                                             | chr21                                 | protein_coding     |                |
| ENSG0000011196.8   | 1.2914649  | 1.61437891 | 1.82E-05   | 8.41E-05   | 2.85     | 4.48   | 3.68  | 2.46   | MAOGB8     | MAO-g-nash homolog B (Drosophila)                                              | chr12                                 | protein_coding     |                |
| ENSG0000015525.15  | -1.200815  | 0.20376478 | 0.0016369  | 0.00511642 | 0.38     | 0.61   | 0.21  | 0.35   | STGALS     | STB beta-galactosidase alpha-2,3-sulfoltransferase 5                           | chr1                                  | protein_coding     |                |
| ENSG0000017217.9   | 1.8618964  | 0.20376478 | 0.0016369  | 0.00511642 | 0.38     | 0.61   | 0.21  | 1.49   | TEF4       | transcription factor 4                                                         | chr17                                 | protein_coding     |                |
| ENSG00000271425.5  | -1.140397  | 0.4568563  | 0.0023221  | 0.00703197 | 0.12     | 0.1    | 0.07  | 0.07   | NBP1D      | neurotrophin breakpoint protein, member 10                                     | chr1                                  | protein_coding     |                |
| ENSG00000134030.12 | -2.5433424 | 5.28744867 | 6.96E-17   | 1.30E-15   | 9.79     | 8.72   | 2.29  | 1.94   | CTF        | CBP80-20 dependent translation initiation factor                               | chr18                                 | protein_coding     |                |
| ENSG0000014633.12  | 0.4170013  | 1.6300152  | 2.33E-07   | 1.48E-05   | 1.74     | 1.74   | 5.74  | 5.23   | CNAB2      | guanine nucleotide binding protein (G protein) alpha 12                        | chr1                                  | protein_coding     |                |
| ENSG0000037001.11  | 1.0918254  | 2.75351021 | 0.00035207 | 0.00126837 | 1.6      | 1.61   | 0.43  | 5.1    | RRA6B      | Ras-related GTP binding B                                                      | chr18                                 | protein_coding     |                |
| ENSG0000012894.15  | 5.3137887  | 1.74831235 | 6.77E-32   | 3.40E-30   | 0.04     | 0.04   | 0.25  | 2.13   | AF0BEC3F   | apolipoprotein B mRNA editing enzyme, catalytic polypeptide-like 3F            | chr22                                 | protein_coding     |                |
| ENSG0000014951.9   | 1.244889   | 1.244889   | 0.00000000 | 0.00000000 | 0        | 0      | 0.04  | 0.47   | RUT1       | luciferase transferase 1 (galactosidase 2-alpha1, -luciferase, H blood group)  | chr2                                  | protein_coding     |                |
| ENSG0000011335.19  | 4.8998041  | -0.5067113 | 0.0189873  | 0.04519557 | 0        | 0      | 0.24  | 0.04   | BTIK       | Brunn amegalin homologous tyrosine kinase                                      | chr4                                  | protein_coding     |                |
| ENSG0000022993.13  | 2.6518252  | -2.4177887 | 0.00000000 | 0.00000000 | 0        | 0      | 0.04  | 0.04   | BTIK       | Brn-1 related CTD-associated factor 2, transcriced to 2, to 2                  | chr16                                 | protein_coding     |                |
| ENSG0000016739.4   | -6.2711019 | 5.0149677  | 2.19E-61   | 5.91E-59   | 48.86    | 45.36  | 0.91  | 0.72   | CKX1L      | chemokine (C-X-C motif) ligand 1 (melanoma growth stimulating activity, alpha) | chr19                                 | protein_coding     |                |
| ENSG00000156245.8  | -1.0753194 | 6.2195205  | 0.00019251 | 0.00072881 | 24.8     | 22.36  | 15.13 | 14.69  | NUMB       | numb homolog (Drosophila)-like                                                 | chr1                                  | protein_coding     |                |
| ENSG0000017657.7   | 1.5053154  | 5.2758448  | 1.0E-05    | 1.0E-09    | 0.1      | 0.1    | 7.3   | 21.4   | CKX1       | 21 homologous (Drosophila)-like                                                | chr1                                  | protein_coding     |                |
| ENSG0000018585.18  | -3.628061  | 6.3510294  | 3.40E-30   | 1.57E-28   | 18.6     | 18.27  | 21.8  | 1.78   | OFML2A     | olfactomedin-like 2A                                                           | chr1                                  | protein_coding     |                |
| ENSG00000103310.13 | -1.8189593 | 2.0827372  | 8.52E-35   | 4.91E-33   | 1.66     | 1.89   | 0.12  | 0.01   | MEFV       | Mediterranean fever                                                            | chr16                                 | protein_coding     |                |
| ENSG0000012478.10  | -1.4170013 | 1.6300152  | 2.33E-07   | 1.48E-05   | 1.74     | 1.74   | 5.74  | 5.23   | FASTKD3    | fast kinase domain 3                                                           | chr1                                  | protein_coding     |                |
| ENSG00000261183.4  | 3.90913678 | 1.2997462  | 4.42E-21   | 1.16E-19   | 0.06     | 0.32   | 0.41  | 3.56   | RP11-532P1 | ---                                                                            | chr15                                 | antisense          |                |
| ENSG00000125954.1  | 2.1604948  | -2.2189205 | 0.00271392 | 0.04949569 | 0.02     | 0.01   | 0.01  | 0.12   | XOac-BPG1  | ---                                                                            | chr6                                  | antisense          |                |
| ENSG0000011517.5   | 1.2676308  | 0.7982133  | 3.18E-18   | 6.55E-15   | 0.9      | 0.58   | 0.05  | 0.42   | PAK3       | lysophosphatidic acid receptor 3                                               | chr8                                  | protein_coding     |                |
| ENSG00000137875.4  | 8.85305975 | -0.035738  | 5.29E-20   | 1.27E-18   | 0        | 0      | 0.26  | 1.59   | BCL2L10    | BCL2-like 10 (apoptosis facilitator)                                           | chr15                                 | protein_coding     |                |
| ENSG0000027958.1   | 5.6116133  | -2.681208  | 0.0008656  | 0.00280128 | 0.2      | 0.13   | 0.15  | 0.15   | RP4-635A23 | ---                                                                            | chr15                                 | TEC                |                |
| ENSG0000010361.10  | 1.1701833  | 5.071188   | 5.85E-05   | 0.00024537 | 3.92     | 4.05   | 11.9  | 12.8   | CLTAPC5    | solute carrier family 7, member 6 cospoite strand                              | chr1                                  | protein_coding     |                |
| ENSG00000170153.9  | -1.8421834 | 0.6128293  | 1.39E-06   | 7.82E-06   | 0.19     | 0.17   | 0.09  | 0.05   | RNF150     | ring finger protein 150                                                        | chr16                                 | protein_coding     |                |
| ENSG0000010314.3   | 1.8454654  | 0.058468   | 1.05E-05   | 4.20E-05   | 0.1      | 0.1    | 0.1   | 0.01   | CABP7      | calyx-binding factor, runt domain, alpha subunit 2, transcriced to 2, to 2     | chr2                                  | protein_coding     |                |
| ENSG0000026630.5   | 1.6791197  | 1.4975472  | 7.90E-07   | 4.62E-06   | 0.13     | 0.29   | 0.86  | 0.92   | SNAG-AS1   | SNAG antisense RNA 1                                                           | chr16                                 | antisense          |                |
| ENSG0000016323.17  | 1.6268431  | 0.6912462  | 1.08E-05   | 5.13E-05   | 0.17     | 0.06   | 0.04  | 0.53   | ADAMTS13   | ADAM metalloproteinase with thrombospondin type 1 motif, 13                    | chr1                                  | protein_coding     |                |
| ENSG0000018346.3   | 1.8419434  | 0.0374627  | 1.05E-05   | 0.00013784 | 0.19     | 0.34   | 1.05  | 0.88   | TCG3       | tiger transmembrane domain containing 3                                        | chr1                                  | protein_coding     |                |
| ENSG00000112782.14 | 2.5477751  | -0.0004263 | 0.00156293 | 0          | 0.02     | 0.04   | 0.02  | 0.08   | CLUC       | channel intracellular channel 5                                                | chr6                                  | protein_coding     |                |
| ENSG0000010360.13  | 1.6713815  | 3.8136058  | 3.67E-08   | 2.60E-07   | 5.56     | 4.19   | 20.84 | 20.2   | F17T       | interfacial transport 7                                                        | chr22                                 | protein_coding     |                |
| ENSG0000026933.4   | 1.8618964  | 0.20376478 | 0.0016369  | 0.00511642 | 0.38     | 0.61   | 0.21  | 0.03   | UNC0960    | long intergenic non-protein coding RNA 668                                     | chr17                                 | protein_coding     |                |
|                    |            |            |            |            |          |        |       |        |            |                                                                                |                                       |                    |                |

|                    |            |            |            |            |        |        |        |        |                |                |                                                                                  |           |
|--------------------|------------|------------|------------|------------|--------|--------|--------|--------|----------------|----------------|----------------------------------------------------------------------------------|-----------|
| ENSG0000029065.1   | -2.6125167 | 0.21631821 | 5.19e-10   | 4.71e-09   | 2.33   | 2.27   | 0.05   | 0.36   | RP5-102120 --  | chr14          | antisense                                                                        |           |
| ENSG0000018391.4   | 3.194347   | 7.8444958  | 1.45E-15   | 4.5E-15    | 1.51   | 2.66   | 0.05   | 0.18   | NOC1           | chr17          | noggin                                                                           |           |
| ENSG00000145687.1  | -1.1737581 | 0.74831891 | 1.18E-08   | 8.90E-08   | 1.61   | 1.47   | 0.65   | 0.58   | SSBP2          | chr5           | single-stranded DNA binding protein 2                                            |           |
| ENSG00000278869.1  | 2.238906   | 1.7083109  | 9.58E-11   | 9.61E-10   | 1.01   | 1.03   | 7.2    | 5.65   | CITF22-4969 -- | chr22          | lncRNA                                                                           |           |
| ENSG0000021762.18  | 2.693925   | 7.2903621  | 1.26E-14   | 4.36E-13   | 4.07   | 2.18   | 0.05   | 11.78  | OSBP5          | chr15          | oxysterol binding protein-like 5                                                 |           |
| ENSG0000027133.1   | 6.3224473  | 2.1673809  | 8.99E-06   | 4.38E-05   | 0      | 0      | 0.08   | 0.1    | RP3-3684A.6 -- | chrX           | sense_intronic                                                                   |           |
| ENSG0000019497.12  | 1.3831588  | 2.05027513 | 1.65E-05   | 7.67E-05   | 0.65   | 0.62   | 2.02   | 2.41   | ZNF18          | chr17          | zinc finger protein 18                                                           |           |
| ENSG00000137124.6  | 1.531491   | 0.8458175  | 1.75E-16   | 1.00E-13   | 20.6   | 1.22   | 5.22   | 5.95   | ADAH1B1        | chr1           | aldehyde dehydrogenase 1 family, member B1                                       |           |
| ENSG00000261594.3  | 3.7479471  | 0.67688303 | 1.63E-16   | 2.97E-15   | 0.06   | 0.06   | 1.28   | 0.87   | TBPLG          | chr17          | tuberosclerous phosphatase-like                                                  |           |
| ENSG0000014107.7   | 2.5895262  | 1.7617416  | 2.15E-13   | 2.88E-12   | 0.24   | 0.23   | 0.04   | 0.26   | CEP100         | chr10          | centrosomal protein 100kDa                                                       |           |
| ENSG00000121769.6  | 1.5335801  | 0.727107   | 1.48E-08   | 4.30E-07   | 0.19   | 0.17   | 0.05   | 1.71   | FABP9          | chr1           | fatty acid binding protein 9, muscle and heart                                   |           |
| ENSG0000022033.1   | 2.7728377  | 1.7162449  | 2.21E-14   | 3.30E-13   | 0.42   | 0.21   | 2.59   | 3.05   | UNC10124       | chr2           | long interspersed non-protein coding RNA 1124                                    |           |
| ENSG0000016436.9   | -5.655658  | 0.5958948  | 0.0333E-05 | 0.0000000  | 0.31   | 0.31   | 0.06   | 1.1    | PMPOL          | chr4           | primase and polymerase (DNA-directed)                                            |           |
| ENSG00000172403.9  | -5.655658  | 0.0008654  | 0.0028128  | 0.0000000  | 0.01   | 0.01   | 0      | 0      | SNYPO2         | chr1           | synaptonemal 2                                                                   |           |
| ENSG00000106348.15 | -2.0206653 | 7.5054177  | 6.74E-12   | 7.72E-11   | 81.04  | 77.56  | 27.92  | 23.85  | MPDH1          | chr7           | IMP (inosine 5'-monophosphate) dehydrogenase 1                                   |           |
| ENSG00000136114.14 | 6.7299129  | 1.0594747  | 2.48E-10   | 1.16E-09   | 0.02   | 0      | 1.26   | 1.32   | THSD1          | chr13          | thrombospondin, type 1, domain containing 1                                      |           |
| ENSG00000262514.1  | 5.0480404  | -2.9799228 | 0.0100455  | 0.0258742  | 0      | 0      | 0.03   | 0.18   | RP11-96D1.5 -- | chr11          | sense_intronic                                                                   |           |
| ENSG00000166266.12 | 3.7399004  | 1.62721315 | 1.76E-21   | 4.78E-20   | 0.05   | 0.05   | 0.53   | 1.35   | CUL5           | chr16          | culin 5                                                                          |           |
| ENSG00000138999.4  | -1.1501911 | 2.3890207  | 1.44E-05   | 6.83E-05   | 2.16   | 2.65   | 1.05   | 1.46   | NCV            | chr5           | neuroblastoma overexpressed                                                      |           |
| ENSG00000168957.10 | -1.5343835 | 6.83897309 | 1.35E-07   | 8.90E-07   | 88.36  | 86.35  | 37.37  | 43.22  | HINT1          | chr5           | histidine triad nucleotide binding protein 1                                     |           |
| ENSG00000122068.11 | 3.1069646  | 1.9302798  | 6.23E-18   | 1.66E-16   | 0.09   | 0.07   | 0.57   | 1.33   | PTTID1         | chr1           | forky-two-three domain containing 1                                              |           |
| ENSG00000163993.6  | 4.536398   | 7.2717015  | 2.68E-10   | 2.98E-39   | 9.43   | 9.02   | 25.84  | 22.87  | S100P          | chr4           | S100 calcium binding protein 9                                                   |           |
| ENSG00000170264.11 | 1.5748519  | 0.56702198 | 3.53E-05   | 0.0015336  | 0.1    | 0.19   | 0.5    | 0.67   | FAM161A        | chr2           | family with sequence similarity 161, member A                                    |           |
| ENSG00000214212.7  | -38200669  | -1.0719894 | 2.77E-07   | 1.73E-06   | 0.04   | 0.26   | 1.47   | 0.59   | C3orf38        | chr19          | chromosome 3 open reading frame 38                                               |           |
| ENSG0000014963.4   | -9.8234869 | 2.4352112  | 9.12E-50   | 1.24E-47   | 0.05   | 0.22   | 1.65   | 6.85   | ATL1           | chr1           | lymphoblastic leukemia associated hematopoiesis regulator 1                      |           |
| ENSG00000164332.7  | 1.6956089  | 2.4296249  | 1.07E-07   | 7.18E-07   | 0.64   | 1.05   | 2.6    | 4.72   | ULCP1          | chr15          | ubiquitin-like domain containing CTD phosphatase 1                               |           |
| ENSG0000020445.10  | -1.1717376 | 6.6950657  | 4.73E-05   | 0.00030001 | 15.17  | 14.42  | 8.99   | 8.48   | TYRO3          | chr15          | TYRO3 protein tyrosine kinase                                                    |           |
| ENSG00000123200.15 | 1.77307912 | 4.13754395 | 3.77E-09   | 3.07E-08   | 0.51   | 0.81   | 2.29   | 3.77   | ZC3H13         | chr13          | zinc finger CCHC-type containing 13                                              |           |
| ENSG00000173068.16 | -1.5071368 | 0.38734331 | 8.90E-05   | 0.0036046  | 0.13   | 0.09   | 0.06   | 0.04   | BNCF           | chr1           | basonuclin 2                                                                     |           |
| ENSG0000010469.3   | 1.6429975  | -2.616209  | 0.0008564  | 0.0028128  | 0      | 0      | 0      | 0.36   | RP11-332M2     | chr1           | sense_intronic                                                                   |           |
| ENSG00000131437.14 | 3.19531619 | 1.13664989 | 9.26E-16   | 1.58E-14   | 0.06   | 0.04   | 0.04   | 0.87   | KIF3A          | chr1           | kinesin family member 3A                                                         |           |
| ENSG00000250105.1  | 5.7831348  | -2.541544  | 0.0026535  | 0.0009747  | 0      | 0      | 0.39   | 0.38   | CD1-307401 --  | chr11          | lncRNA                                                                           |           |
| ENSG00000131459.11 | 2.2774617  | 5.4614013  | 0.001278   | 1.44E-13   | 19.37  | 18.25  | 5.1    | 5.3    | CPPT2          | chr17          | glutamine-fructose-6-phosphate transaminase 2                                    |           |
| ENSG00000123121.12 | 1.17711416 | 0.70882343 | 0.0012078  | 0.0039302  | 0.5    | 0.42   | 1.4    | 1.39   | CCDC183        | chr1           | coiled-coil domain containing 183                                                |           |
| ENSG0000014748.12  | -2.3705185 | 4.7436396  | 6.23E-11   | 1.00E-13   | 6.63   | 6.77   | 1.64   | 1.81   | IRG1           | chr3           | leucine-rich repeats and immunoglobulin-like domains 1                           |           |
| ENSG0000007684.10  | 1.9249459  | 4.4404242  | 7.54E-05   | 0.0031148  | 2.63   | 2.69   | 1.67   | 1.94   | PHD finger 1   | chr17          | zinc finger PHD finger 1                                                         |           |
| ENSG00000108210.3  | -1.0488088 | 7.51466405 | 0.0026254  | 0.0009122  | 84.45  | 76.57  | 53.05  | 50.62  | COASY          | chr17          | Cos synthase                                                                     |           |
| ENSG00000122042.9  | 1.5824815  | 1.9498987  | 0.0026254  | 0.0009122  | 84.45  | 76.57  | 53.05  | 50.62  | COASY          | chr17          | Cos synthase                                                                     |           |
| ENSG00000139174.9  | -1.9817337 | -0.8265991 | 0.000121   | 0.00047961 | 0.09   | 0.12   | 0.07   | 0.01   | PRICKLE1       | chr12          | prickle homolog 1 (Drosophila)                                                   |           |
| ENSG00000210112.1  | 3.8681038  | 1.117200   | 4.12E-20   | 9.98E-19   | 2.75   | 3.75   | 71.13  | 56.47  | MT-TM          | chrM           | mitochondrially encoded tRNA methionine                                          |           |
| ENSG00000261578.11 | 1.590047   | 1.3265697  | 0.0000000  | 0.0014279  | 0.07   | 0.14   | 0.4    | 0.37   | RP11-211L3     | chr1           | sense_intronic                                                                   |           |
| ENSG00000102024.16 | 1.30060304 | 1.132E-05  | 5.40E-05   | 2.2E-26    | 2.26   | 2.26   | 5.1    | 9.84   | PL3            | chr17          | plastin 3                                                                        |           |
| ENSG00000127343.4  | 1.6985071  | -0.9650134 | 0.0016616  | 0.0031962  | 0.07   | 0.04   | 0.24   | 0.21   | SPAG5-AS1      | chr17          | SPAG5 antisense RNA 1                                                            |           |
| ENSG00000154806.4  | -4.9580894 | 0.4848084  | 3.53E-15   | 5.71E-14   | 3.28   | 7.89   | 0.88   | 8.83   | SYSL-DNAO22    | chr17          | SYSL-DNAO22 readthrough (NMD candidate)                                          |           |
| ENSG00000198265.10 | 2.92417357 | 2.34633787 | 9.88E-18   | 1.99E-16   | 0.04   | 0.1    | 0.59   | 0.87   | HEZ            | chr17          | helicase with zinc finger                                                        |           |
| ENSG00000128590.4  | 2.55143016 | 0.7988018  | 7.51E-11   | 6.6E-10    | 0.16   | 0.13   | 1.04   | 1.19   | DNAH9          | chr7           | Dna (Hsp40) domain, subfamily 8, member 9                                        |           |
| ENSG00000102181.19 | 1.9259889  | 0.9319134  | 0.0019815  | 0.00071331 | 26.5   | 16.5   | 12.7   | 12.7   | C2orf62        | chr2           | C2 calcium-dependent domain containing 4A                                        |           |
| ENSG00000080470.12 | -1.2176386 | 8.44809418 | 2.38E-05   | 0.0001077  | 441.06 | 373.76 | 245.11 | 22.41  | GSTP1          | chr1           | glutathione S-transferase pi 1                                                   |           |
| ENSG00000271212.1  | 1.4276122  | 1.9248968  | 1.03E-09   | 0.0021083  | 0.53   | 0.66   | 18.96  | 14.17  | RP11-592C09    | chr1           | antisense                                                                        |           |
| ENSG00000163596.15 | 2.83946394 | -0.2048058 | 5.49E-09   | 4.37E-08   | 0.02   | 0.01   | 0.13   | 0.19   | KAIL           | chr2           | islet cell autoantigen 1,69kDa                                                   |           |
| ENSG00000179119.13 | 1.2104368  | 2.0731851  | 0.0015014  | 0.00598036 | 0.33   | 0.37   | 0.81   | 1.36   | SPRY2D1        | chr11          | SPRY2, suppressor of Ty, domain containing 1 (S. cerevisiae)                     |           |
| ENSG00000146991.15 | -4.0519959 | 3.9634547  | 4.97E-13   | 2.1E-11    | 10.08  | 9.78   | 0.86   | 0.71   | TAO3           | chr10          | tau protein kinase 3                                                             |           |
| ENSG00000168006.18 | 1.0382661  | 3.49083653 | 0.0050862  | 0.0017434  | 1.73   | 2.1    | 4.27   | 6.25   | CFSP           | chr11          | casein 7, acetoxy-related casein peptidase                                       |           |
| ENSG00000142046.13 | 1.86318399 | 1.2926326  | 1.65E-06   | 9.19E-06   | 0.43   | 0.25   | 1.4    | 1.47   | TMEM81         | chr10          | transmembrane protein 81                                                         |           |
| ENSG00000122035.6  | 3.5126311  | 1.41830209 | 6.19E-19   | 9.80E-18   | 0.1    | 0.3    | 0.3    | 0.6    | RASL11A        | chr1           | RAS-like family 11, member A                                                     |           |
| ENSG00000198768.9  | -6.1863178 | -2.4412039 | 4.74E-05   | 0.00020001 | 0.09   | 0.03   | 0      | 0      | PCDD1L         | chr20          | adenomatous polyposis coli down-regulated 1-like                                 |           |
| ENSG00000133825.3  | 5.8502661  | -0.2638411 | 1.44E-17   | 2.91E-16   | 0      | 0      | 0.99   | 1.36   | RTP1           | chr3           | receptor (chemosensory) transducer 3                                             |           |
| ENSG00000138355.5  | 1.6343838  | 0.9410316  | 1.51E-15   | 1.42E-15   | 0.16   | 0.13   | 0.4    | 0.17   | C2CD4A         | chr1           | C2 calcium-dependent domain containing 4A                                        |           |
| ENSG00000198668.9  | 1.65589956 | 3.43308405 | 5.22E-08   | 3.63E-07   | 2.05   | 1.77   | 7.62   | 8.46   | RUT11          | chr10          | fucosyltransferase 11 (alpha 1,3 fucosyltransferase)                             |           |
| ENSG0000026148.11  | 1.9568788  | 0.902146   | 0.0019815  | 0.00071331 | 26.5   | 16.5   | 12.7   | 12.7   | HECTD1         | chr10          | HECT domain containing 1, E3 ubiquitin protein ligase 1                          |           |
| ENSG00000173898.10 | -2.8913668 | 0.89392093 | 2.43E-21   | 6.52E-20   | 45.29  | 45.06  | 7.99   | 8.21   | SPIN2B         | chr11          | spinectin, beta, non-ubiquitin protein ligase 2                                  |           |
| ENSG00000198740.7  | 2.26623673 | 1.4725989  | 1.24E-10   | 1.23E-09   | 0.12   | 0.12   | 0.74   | 0.8    | DNF262         | chr17          | zinc finger protein 652                                                          |           |
| ENSG00000254142.2  | 1.4073213  | 5.6024874  | 0.0000000  | 0.0000000  | 0.25   | 0.25   | 0      | 0      | RP11-53M11     | chr17          | antisense                                                                        |           |
| ENSG00000183092.14 | -1.7741769 | 4.44636084 | 2.33E-09   | 1.94E-08   | 4.8    | 4.26   | 1.93   | 1.57   | REGAIN         | chr14          | brain-enriched gap junction kinase-associated                                    |           |
| ENSG00000157654.16 | -2.7846727 | 5.52342942 | 4.13E-19   | 9.35E-18   | 4.01   | 4.71   | 0.9    | 0.79   | PALM2-AKA1     | chr19          | PALM2-AKA1 readthrough                                                           |           |
| ENSG0000013456.11  | -1.1818101 | 1.4583213  | 6.85E-06   | 3.48E-05   | 0.38   | 0.38   | 0.88   | 0.16   | CD101          | chr1           | CD101 molecule                                                                   |           |
| ENSG00000273199.1  | 2.2426911  | -0.0388459 | 4.29E-07   | 2.62E-06   | 0.12   | 0.45   | 2.15   | 0.45   | 21.6           | AP000692.10 -- | chr21                                                                            | antisense |
| ENSG00000186399.10 | 6.02248524 | -2.3787733 | 6.38E-05   | 0.0004052  | 0      | 0      | 0.07   | 0.2    | GOLGA8R        | chr15          | golgin 88 family, member 8                                                       |           |
| ENSG00000137972.14 | 2.4029627  | -1.4636086 | 0.0039494  | 0.0013227  | 0.01   | 0.01   | 0.05   | 0.43   | EMR4           | chr15          | seria domain, transmembrane domain (TM), and cytoplasmic domain, (semaphorin) 6D |           |
| ENSG00000135250.15 | 1.1584184  | 0.3821976  | 9.23E-05   | 0.00037325 | 1.59   | 2.05   | 4.8    | 6.04   | SRPK2          | chr7           | SRSF protein kinase 2                                                            |           |
| ENSG00000175354.17 | 1.00841712 | 3.62882246 | 0.0006193  | 0.00235824 | 1.3    | 1.73   | 3.18   | 5.02   | TYMP2          | chr18          | protein tyrosine phosphatase, non-receptor type 2                                |           |
| ENSG0000014507.8   | 1.4206275  | -0.785321  | 1.11E-04   | 9.61E-09   | 0.53   | 0.62   | 0      | 0      | CACZ           | chr2           | carbonic anhydrase II                                                            |           |
| ENSG00000142552.6  | -5.1203976 | 4.6019263  | 6.15E-47   | 7.23E-45   | 22.65  | 18.46  | 0.83   | 0.75   | RCN3           | chr19          | reticulocalbin 3, EF-hand calcium binding domain                                 |           |
| ENSG0000015248.14  | 1.9687749  | 0.9089489  | 1.68E-07   | 4.06E-06   | 0.09   | 0.09   | 0.23   | 0.55   | ATG10L         | chr19          | atrophagy related 10                                                             |           |
| ENSG00000135436.7  | 1.75871785 | -0.5609444 | 0.0002139  | 0.00080828 | 0.09   | 0.01   | 0.23   | 0.23   | FAM196B        | chr12          | family with sequence similarity 196, member B                                    |           |
| ENSG00000153140.7  | 1.40773509 | 1.3921897  | 1.74E-05   | 8.08E-05   | 0.41   | 0.28   | 0.66   | 1.94   | CTN3           | chr1           | centrin, EF-hand protein, 3                                                      |           |
| ENSG00000168136.7  | 1.9462333  | 1.4941793  | 3.11E-11   | 3.00E-10   | 119.7  | 100.36 | 1.85   | 120.36 | AT5            | chr19          | transcription factor 5                                                           |           |
| ENSG00000114812.11 | -3.9448273 | 1.31412037 | 1.15E-22   | 3.35E-21   | 0.98   | 1.27   | 0.1    | 0.1    | WPR1           | chr1           | vasoactive intestinal peptide receptor 1                                         |           |
| ENSG0000029838.1   | 2.0637401  | 1.86237614 | 1.03E-09   | 9.01E-09   | 0.35   | 0.43   | 1.89   | 2.41   | RP11-317N8     | chr1           | antisense                                                                        |           |
| ENSG00000146297.14 | 1.049171   | 6.0323338  | 0.001325   | 0.0005027  | 10.10  | 10.10  | 0.8    | 5.14   | MEIO2          | chr1           | mediator complex subunit 22                                                      |           |
| ENSG00000261455.1  | 1.7444558  | 1.32169    | 4.76E-07   | 2.89E-06   | 0.61   | 0.4    | 1.58   | 2.96   | UNC10103       | chr2           | long interspersed non-protein coding RNA 1003                                    |           |
| ENSG00000111990.12 | 1.06931857 | 2.3444424  | 0.0006347  | 0.0020571  | 0.69   | 0.92   | 1.4    | 3.13   | FGFR1OP2       | chr1           | FGFR1 open reading frame 2                                                       |           |
| ENSG00000181250.11 | 1.4368477  | 1.4368477  | 1.52E-15   | 2.55E-14   | 0.11   | 0.11   | 0.03   | 2.08   | LRRC7A         | chr1           | leucine rich repeat containing 75A                                               |           |
| ENSG00000151079.12 | 2.21681123 | 1.0437109  | 1.37E-09   | 1.18E-08   | 0.01   | 0.03   | 0.7    | 0.55   | EPB415         | chr2           | erythrocyte membrane protein band 4.1 like 5                                     |           |
| ENSG0000024712.6   | 2.1391251  | 2.0249     |            |            |        |        |        |        |                |                |                                                                                  |           |



|                    |            |            |            |            |          |          |          |          |               |                                                                       |       |                |
|--------------------|------------|------------|------------|------------|----------|----------|----------|----------|---------------|-----------------------------------------------------------------------|-------|----------------|
| ENSG0000016669.12  | 1.45912845 | 2.48147764 | 3.32E-06   | 1.78E-05   | 0.15     | 0.19     | 0.43     | 0.84     | FAM204A       | family with sequence similarity 204, member A                         | chr10 | protein_coding |
| ENSG0000016291.13  | 0.030625   | 0.030625   | 0.030625   | 0.030625   | 0.030625 | 0.030625 | 0.030625 | 0.030625 | 0.030625      | proteoglycan and adipocyte receptor family member III                 | chr10 | protein_coding |
| ENSG0000026260.1   | -1.1545173 | 3.37046409 | 5.60E-07   | 3.36E-06   | 39.26    | 33.06    | 16.48    | 17.28    | SNHG19        | small nucleolar RNA host gene 19                                      | chr19 | lincRNA        |
| ENSG0000016686.11  | 0.0269861  | 6.20018574 | 0.00036798 | 0.00132135 | 16.05    | 12.8     | 38.87    | 39.55    | NAB2          | NGF-A binding protein 2 (GR1 binding protein 2)                       | chr12 | protein_coding |
| ENSG0000012143.11  | 0.1504941  | 0.0991064  | 0.22107    | 1.41E-05   | 17.19    | 19.01    | 14.1E-05 | 17.19    | PNOL1         | protein kinase N1                                                     | chr12 | protein_coding |
| ENSG0000011728.10  | 3.1911251  | 0.81504983 | 1.51E-14   | 2.31E-13   | 0.15     | 0.02     | 0.7      | 1.39     | GBP3          | guanylate binding protein 3                                           | chr1  | protein_coding |
| ENSG0000025398.2   | 8.41378089 | -0.4378572 | 3.10E-16   | 5.50E-15   | 0        | 0        | 0.67     | 0.62     | HCAR3         | hydroxy-carboxylic acid receptor 3                                    | chr12 | protein_coding |
| ENSG0000014807.14  | -0.1537914 | 0.0042687  | 0.01798789 | 0.0001297  | 0.02     | 0.2      | 0.02     | 0.39     | AAATF7        | A kinase (PKA) anchor protein 7                                       | chr1  | protein_coding |
| ENSG0000016348.10  | -1.1200611 | 3.84399975 | 5.16E-05   | 0.00021959 | 3.43     | 3.02     | 2.07     | 1.67     | STK36         | serine/threonine kinase 36                                            | chr2  | protein_coding |
| ENSG0000017539.13  | -2.0871851 | 3.44317282 | 1.32E-11   | 1.46E-10   | 6.26     | 5.11     | 1.74     | 1.83     | PHYPLK        | 5-phosphorylthreonine-L-lysine phospho-lyase                          | chr5  | protein_coding |
| ENSG0000016668.13  | 6.24462216 | 2.07E-07   | 1.33E-06   | 2.6E-06    | 10.29    | 10.61    | 1.28     | 10.29    | LMNK1         | LM domain kinase 1                                                    | chr22 | protein_coding |
| ENSG0000016877.10  | 1.96923626 | 3.68002266 | 1.22E-10   | 1.20E-09   | 1.4      | 1.48     | 7.23     | 7.79     | ITCN2         | testonic family member 2                                              | chr12 | protein_coding |
| ENSG0000274400.1   | 3.32911425 | -0.7844277 | 7.88E-05   | 6.86E-09   | 0        | 0.03     | 0.16     | 0.27     | RMSBP8        | RMS binding protein 8                                                 | chr22 | protein_coding |
| ENSG0000014337.11  | 1.0053292  | 1.41554057 | 0.0006301  | 0.00216312 | 1.2      | 1.43     | 3.74     | 3.27     | SNOUT7        | sorting nexin family member 27                                        | chr1  | protein_coding |
| ENSG00000090447.10 | -1.0660894 | 6.70044932 | 0.0002086  | 0.00017658 | 49.61    | 53.61    | 32.86    | 32.7     | TFAP4         | transcription factor AP-4 (activating enhancer binding protein 4)     | chr16 | protein_coding |
| ENSG0000013936.14  | -1.1197319 | 10.602462  | 8.90E-13   | 1.12E-11   | 22.61    | 23.21    | 7.75     | 70.0     | PRP3A1        | collagen alpha 1(Va) chain                                            | chr9  | protein_coding |
| ENSG00000181007.8  | -6.9857411 | -1.8421603 | 4.98E-08   | 3.47E-07   | 0.38     | 0.11     | 0        | 0        | ZFRP2         | ZFRP2 zinc finger protein                                             | chr19 | protein_coding |
| ENSG00000098676.10 | 1.4991829  | 4.04754727 | 4.29E-07   | 2.62E-06   | 2.32     | 2.48     | 7        | 11.06    | DHX32         | DEAH (Arg-Glu, Ala-His) box polypeptide 32                            | chr10 | protein_coding |
| ENSG0000012539.15  | -1.2487187 | 5.55450707 | 1.72E-05   | 8.10E-05   | 24.37    | 18.44    | 12.38    | 11.63    | MPS1          | mercaptopyruvate sulfolactonase                                       | chr22 | protein_coding |
| ENSG0000018247.7   | -2.1207263 | -1.7033196 | 0.0018671  | 0.00496952 | 0.11     | 0.12     | 0.02     | 0.05     | CAPN12        | calpain 12                                                            | chr19 | protein_coding |
| ENSG0000010810.16  | -3.306866  | 4.5553916  | 3.37E-25   | 1.18E-23   | 8.29     | 8.43     | 0.6      | 1.2      | FYN           | FYN proto-oncogene, Src family tyrosine kinase                        | chr6  | protein_coding |
| ENSG0000012952.6   | 1.54413089 | 1.12743937 | 1.08E-05   | 5.13E-05   | 0.48     | 0.38     | 1.94     | 1.41     | TGCB3         | liger transposable element derived 3                                  | chr1  | protein_coding |
| ENSG0000012986.12  | 3.1096621  | 0.23981688 | 1.64E-11   | 1.80E-10   | 0.02     | 0.02     | 0.14     | 0.37     | LTN1          | retinol E3 ubiquitin protein ligase 1                                 | chr21 | protein_coding |
| ENSG0000014115.8   | 7.51419236 | -1.2206655 | 3.23E-11   | 3.41E-10   | 0        | 0        | 0.17     | 0.27     | RPB1          | ribosomal protein L1, cellular                                        | chr3  | protein_coding |
| ENSG0000277786.1   | 4.1456989  | -0.9907332 | 1.04E-09   | 1.22E-08   | 0        | 0        | 0.09     | 0.48     | RP11-114f3.1  | RP11-114f3.1                                                          | chr1  | antisense      |
| ENSG00000261189.1  | 1.53268788 | -0.8031162 | 0.0021673  | 0.00603335 | 0.42     | 0.03     | 1.05     | 0.77     | RP3-512B11..  | long intergenic non-protein coding RNA 313                            | chr1  | antisense      |
| ENSG00000185186.7  | -1.2247624 | 1.51434343 | 0.0002049  | 0.00075733 | 2.85     | 4.4      | 0.22     | 1.72     | INT00313      | zinc finger, ZZ-type containing 3                                     | chr16 | lincRNA        |
| ENSG0000036549.11  | 1.4092474  | 0.45308319 | 0.0025313  | 0.0094088  | 0.08     | 0.18     | 0.35     | 0.55     | ZZZ3          | zinc finger, ZZ-type containing 3                                     | chr1  | protein_coding |
| ENSG00000186205.11 | 1.60523466 | 5.72547071 | 4.32E-08   | 3.03E-07   | 2.43     | 3.26     | 10.11    | 13.02    | 1-Mar         | mitochondrial aminoside reducing component 1                          | chr1  | protein_coding |
| ENSG0000017980.14  | 3.7233174  | 1.0716695  | 0.0004E-05 | 0.00039407 | 0.25     | 0.16     | 0        | 1.4      | PEX1          | peroxisomal biogenesis factor 1                                       | chr1  | protein_coding |
| ENSG0000025389.1   | 4.9102059  | -0.0511096 | 0.0100455  | 0.02582742 | 0        | 0        | 0.08     | 0.02     | C6orf3        | CDP-diacetylacetylserine (phosphocholate cytidyltransferase) 1        | chr6  | antisense      |
| ENSG000001636245   | 2.9498087  | -0.3083938 | 1.09E-08   | 8.29E-08   | 0.04     | 0.02     | 0.32     | 0.27     | COS1          | CDP-diacetylacetylserine (phosphocholate cytidyltransferase) 1        | chr6  | protein_coding |
| ENSG00000170010.1  | 0.0442682  | -1.2871236 | 6.78E-06   | 3.41E-05   | 1.94     | 1.19     | 0.17     | 1.19     | CTD-212N1     | isoate repeat (1, adult)                                              | chr11 | antisense      |
| ENSG0000010195.10  | -9.956573  | 9.35024374 | 1.50E-120  | 7.20E-117  | 736.41   | 601.29   | 1.3      | 0.5      | FOLR1         | folate receptor 1 (adult)                                             | chr11 | protein_coding |
| ENSG00000167017.7  | 1.2854973  | 2.4673758  | 3.65E-05   | 0.00016155 | 0.12     | 0.13     | 0.5      | 1.15     | ACG3          | arginate RSC catalytic component 3                                    | chr11 | protein_coding |
| ENSG00000105710.15 | 0.5389624  | -0.5389624 | 2.10E-07   | 1.5E-06    | 25.4     | 23.32    | 11.94    | 10.89    | ACF           | acetyltransferase 1                                                   | chr16 | antisense      |
| ENSG00000272219.1  | 2.2711518  | -1.8525306 | 0.0003791  | 0.00892022 | 0.02     | 0.05     | 0.26     | 0.17     | RP1-181H17..  | long intergenic non-protein coding RNA 313                            | chr1  | antisense      |
| ENSG0000027619.1   | 3.188642   | 4.7282023  | 2.11E-11   | 5.21E-20   | 0.48     | 0.11     | 0.48     | 0.66     | RP11-42E23    | long intergenic non-protein coding RNA 313                            | chr1  | antisense      |
| ENSG00000163746.10 | -0.5371273 | -2.9480397 | 0.0029522  | 0.00856312 | 0.12     | 0.02     | 0        | 0        | PLSCR2        | phospholipid scramblase 2                                             | chr3  | protein_coding |
| ENSG0000056098.16  | -1.1077028 | 9.48571722 | 0.0011509  | 0.00540684 | 353.36   | 305.58   | 210.83   | 196.42   | RPS19         | ribosomal protein S19                                                 | chr19 | protein_coding |
| ENSG0000017824.13  | 0.0442682  | -1.2871236 | 6.78E-06   | 3.41E-05   | 1.94     | 1.19     | 0.17     | 1.19     | CTD-212N1     | isoate repeat (1, adult)                                              | chr11 | antisense      |
| ENSG00000256824.1  | -3.3207244 | -2.763773  | 0.0043884  | 0.02489931 | 0.06     | 0.26     | 0.04     | 0        | RP11-21A7A    | long intergenic non-protein coding RNA 313                            | chr1  | antisense      |
| ENSG00000184840.10 | 1.22144847 | -0.793174  | 0.0043884  | 0.0131077  | 0.02     | 0.17     | 0.17     | 0.4      | PABPCB        | PABP1 binding protein                                                 | chr11 | protein_coding |
| ENSG00000159176.12 | -1.1871114 | 0.80136973 | 3.76E-05   | 0.00016473 | 12.26    | 11.06    | 70.62    | 65.5     | CRP1          | coactivator and odv-like-1 nuclear                                    | chr1  | protein_coding |
| ENSG00000269425.1  | 4.9102059  | -0.0511096 | 0.0100455  | 0.02582742 | 0        | 0        | 0.08     | 0.02     | KCOT27927     | highly divergent homeobox                                             | chr19 | antisense      |
| ENSG0000016258.12  | 3.13267828 | -2.7860236 | 0.0043884  | 0.02489931 | 0.06     | 0.26     | 0.04     | 0        | INDEX         | index                                                                 | chr1  | protein_coding |
| ENSG0000036054.11  | 2.1956631  | 0.97393744 | 4.43E-09   | 3.98E-08   | 0.08     | 0.2      | 0.61     | 1.09     | TBC1D23       | TBC1 domain family, member 23                                         | chr1  | protein_coding |
| ENSG0000017210.18  | -0.614611  | 1.121520   | 1.12E-06   | 1.12E-06   | 45.1     | 45.1     | 7.53     | 0.11     | AB4A3         | AB4A3-like domain protein, member 3                                   | chr19 | protein_coding |
| ENSG00000264615.1  | 2.2731749  | -0.1338471 | 5.64E-08   | 3.91E-07   | 0.06     | 0.08     | 0.32     | 0.59     | ZNF616        | zinc finger protein 616                                               | chr19 | protein_coding |
| ENSG00000163293.10 | 6.6972629  | -1.8825742 | 3.73E-07   | 2.30E-06   | 0        | 0        | 0.04     | 0.11     | NPAL1         | NPA-like domain containing 1                                          | chr1  | protein_coding |
| ENSG0000017886.11  | 1.8825742  | -2.8825742 | 0.0029522  | 0.00856312 | 0.12     | 0.02     | 0        | 0.02     | ZNF223        | zinc finger protein 223                                               | chr19 | protein_coding |
| ENSG0000050427.11  | -1.1618602 | 2.75890304 | 1.73E-07   | 1.12E-06   | 3.14     | 3.15     | 3.16     | 0.37     | DPN3          | ocsin 3                                                               | chr1  | protein_coding |
| ENSG00000236716.16 | 5.4792126  | -2.7333202 | 0.0015808  | 0.0489521  | 0        | 0        | 0.09     | 0.04     | PRKG1-AS1     | PRKG1 antisense RNA 1                                                 | chr10 | antisense      |
| ENSG0000018044.4   | -0.414013  | 0.6818522  | 0.0005406  | 0.0018794  | 0        | 0        | 0.1      | 0.18     | C1orf80       | chromosome 1 open reading frame 80                                    | chr1  | protein_coding |
| ENSG0000016926.8   | -1.3011609 | 2.7651605  | 6.76E-06   | 3.40E-05   | 25.73    | 25.77    | 13.32    | 14.55    | KLIF3         | Kruppel-like factor 3                                                 | chr15 | protein_coding |
| ENSG0000017948.6   | -2.568495  | 0.2226531  | 1.07E-09   | 9.33E-09   | 0.3      | 0.37     | 0.07     | 0.08     | INT000174     | long intergenic non-protein coding RNA 174                            | chr1  | lincRNA        |
| ENSG00000106925.17 | 1.5154548  | 0.0002187  | 1.11E-05   | 0.0002187  | 0.28     | 0.14     | 0.28     | 0.11     | T14           | transducin-like enhancer of split 4                                   | chr1  | protein_coding |
| ENSG0000019806.13  | 2.5432049  | 0.5332481  | 6.53E-10   | 5.85E-09   | 0.03     | 0.04     | 0.17     | 0.38     | PRARGC1A      | peroxisome proliferator-activated receptor gamma, coactivator 1 alpha | chr1  | protein_coding |
| ENSG0000066986.6   | 1.5696712  | 0.213758   | 0.0007123  | 0.00031943 | 0.43     | 0.43     | 0.43     | 0.43     | ADAMTS-1      | adomatosis protease 1                                                 | chr11 | protein_coding |
| ENSG0000015526.10  | 1.7565762  | 2.4157193  | 3.78E-08   | 2.66E-07   | 0.12     | 0.21     | 0.67     | 0.81     | ACAP2         | adenomatosis protease 2                                               | chr19 | protein_coding |
| ENSG0000017886.11  | -1.8825742 | -1.8825742 | 3.73E-07   | 2.30E-06   | 0        | 0        | 0.04     | 0        | NP11-495P11.. | long intergenic non-protein coding RNA 313                            | chr1  | lincRNA        |
| ENSG0000016028.11  | 1.8825742  | -1.8825742 | 3.73E-07   | 2.30E-06   | 0        | 0        | 0.04     | 0        | NP11-495P11.. | long intergenic non-protein coding RNA 313                            | chr1  | lincRNA        |
| ENSG0000027138.1   | 4.72173804 | -3.1445547 | 0.0188873  | 0.04519557 | 0        | 0        | 0.24     | 0.08     | RP11-43505..  | long intergenic non-protein coding RNA 313                            | chr1  | lincRNA        |
| ENSG0000017886.12  | 1.2933915  | 5.76364971 | 8.52E-06   | 4.20E-05   | 7.26     | 6.93     | 23.47    | 22.89    | PAPBP1        | poly (ADP-ribose) polymerase family, member 10                        | chr6  | protein_coding |
| ENSG00000122870.10 | 1.2933915  | 5.76364971 | 8.52E-06   | 4.20E-05   | 7.26     | 6.93     | 23.47    | 22.89    | PAPBP1        | poly (ADP-ribose) polymerase family, member 10                        | chr6  | protein_coding |
| ENSG0000012487.12  | -2.2817212 | 1.5305196  | 6.61E-14   | 9.13E-13   | 14.42    | 12.37    | 3.67     | 3.8      | PXV6          | peroxisomal biogenesis factor 6                                       | chr1  | protein_coding |
| ENSG0000010205.9   | 2.1964976  | 8.93536854 | 1.31E-13   | 1.79E-12   | 29.59    | 45.26    | 27.34    | 22.02    | MEH1          | neurofilament, heavy polypeptide                                      | chr22 | protein_coding |
| ENSG0000014357.19  | 1.8948018  | 9.8486018  | 9.38E-08   | 5.98E-07   | 3.12     | 3.29     | 4.2      | 14.03    | PCD           | polychaeta-specific dyshemoglobins                                    | chr1  | protein_coding |
| ENSG0000014822.10  | 5.0417582  | -2.9626774 | 0.0100455  | 0.02582742 | 0        | 0        | 0.08     | 0.02     | TC1E1         | t-complex-associated-testis-expressed 1                               | chr1  | protein_coding |
| ENSG0000014690.1   | -1.818704  | 3.9273062  | 1.64E-06   | 1.40E-08   | 23.4     | 21.2     | 7.57     | 9.22     | LOM           | luciferase                                                            | chr10 | protein_coding |
| ENSG0000014406.11  | 1.97726843 | 4.86070136 | 1.12E-05   | 6.39E-05   | 0.35     | 0.52     | 1.58     | 1.65     | ANGEL2        | angel homolog 2 (Drosophila)                                          | chr1  | protein_coding |
| ENSG0000017818.8   | 8.9561781  | 0.02973013 | 6.55E-21   | 1.68E-19   | 0        | 0        | 0.73     | 0.47     | DVCL1         | ovo-like zinc finger 1                                                | chr11 | protein_coding |
| ENSG0000010333.15  | -2.4462026 | 0.0004382  | 0.0004382  | 0.0004382  | 0.02     | 0.02     | 0.02     | 0        | PCNA          | proliferating cell nuclear antigen                                    | chr1  | protein_coding |
| ENSG0000017655.12  | 1.7287474  | 0.0042738  | 3.58E-05   | 0.0001572  | 0.11     | 0.06     | 0.37     | 0.4      | DUSP18        | dual specificity phosphatase 18                                       | chr22 | protein_coding |
| ENSG00000180263.12 | 4.293105   | 0.2547439  | 2.90E-16   | 5.17E-15   | 0        | 0        | 0.02     | 0.27     | FDGE          | FYVE, RhoGEP and PH domain containing 6                               | chr12 | protein_coding |
| ENSG0000020452.4   | -1.252825  | 0.0004382  | 0.0004382  | 0.0004382  | 0.02     | 0.02     | 0.02     | 0        | LRG7          | leucine rich repeat containing 7                                      | chr1  | protein_coding |
| ENSG0000016527.11  | -1.1291912 | 0.6493334  | 9.32E-05   | 0.00037686 | 19.67    | 18.6     | 11.55    | 11.77    | NOL6          | nucleolar protein 6 (RNA-associated)                                  | chr9  | protein_coding |
| ENSG0000013760.14  | 2.0012332  | 0.8126209  | 1.21E-07   | 8.04E-07   | 0.07     | 0.11     | 0.34     | 0.66     | MEK1          | NIMA-related kinase 1                                                 | chr4  | protein_coding |
| ENSG0000018842.7   | 1.2925252  | 0.0018704  | 0.0005406  | 0.0018704  | 0        | 0        | 0.1      | 0.45     | ARL4A         | ADP-ribosylation factor-like 4C                                       | chr1  | protein_coding |
| ENSG0000008280.17  | -1.1219513 | 0.3365782  | 2.33E-05   | 0.00010563 | 274.14   |          |          |          |               |                                                                       |       |                |

[illegible]

|                    |            |            |            |            |         |         |            |        |              |                                                                                                               |       |                |
|--------------------|------------|------------|------------|------------|---------|---------|------------|--------|--------------|---------------------------------------------------------------------------------------------------------------|-------|----------------|
| ENSG0000014374.14  | 1.9095995  | 6.91408382 | 0.00015272 | 0.0008987  | 26.2    | 28.35   | 68.58      | 86.61  | ETFA         | electron-transfer-flavoprotein, alpha polypeptide                                                             | chr15 | protein_coding |
| ENSG00000170614.13 | 1.9095995  | 6.91408382 | 0.00015272 | 0.0008987  | 15.4    | 16.04   | 7.57       | 84     | NDST1        | N-deacetylase-N-sulfotransferase (heparan glucosaminyl)                                                       | chr14 | protein_coding |
| ENSG0000013943.19  | -2.9876658 | 4.14133024 | 3.386E-21  | 8.96E-20   | 5.72    | 5.67    | 0.83       | 1.08   | C14orf159    | chromosome 14 open reading frame 159                                                                          | chr14 | protein_coding |
| ENSG00000189057.9  | 4.0580384  | 1.17221808 | 5.22E-21   | 1.38E-19   | 0.05    | 0.06    | 0.69       | 1.76   | FAM1118      | family with sequence similarity 111, member B                                                                 | chr14 | protein_coding |
| ENSG00000274818.1  | 1.2482492  | 2.9868509  | 0.00015272 | 0.0008987  | 17.78   | 18.1    | 18.59      | 17.78  | RP1-292J20   | transcript variant 2                                                                                          | chr14 | lincRNA        |
| ENSG00000047346.11 | 3.3676779  | 0.24176094 | 5.99E-13   | 7.64E-12   | 0.01    | 0.04    | 0.18       | 0.41   | FAM214A      | family with sequence similarity 214, member A                                                                 | chr15 | protein_coding |
| ENSG00000279765.2  | 2.5497941  | 1.4825111  | 1.82E-12   | 2.23E-11   | 0.76    | 0.81    | 0.34       | 5.93   | RP1-43781    | transcript variant 1                                                                                          | chr15 | protein_coding |
| ENSG00000158006.12 | 1.9581794  | 3.77216988 | 5.09E-06   | 2.01E-05   | 4.28    | 4.18    | 2.38       | 1.98   | PANX2        | panx2, activating factor acetylcholinesterase 2, 400Aa                                                        | chr15 | protein_coding |
| ENSG0000011860.14  | 4.73595578 | 1.4554304  | 1.96E-07   | 1.28E-06   | 0       | 0       | 0.05       | 0.1    | CEP85L       | centrosomal protein 85kDa, cy1                                                                                | chr16 | protein_coding |
| ENSG0000013840.17  | -1.75723   | 6.3702922  | 5.79E-06   | 6.00E-08   | 64.40   | 56.73   | 25.93      | 23.3   | STGALNAC     | ST6 (alpha-N-acetyl-neuraminyl-2,3-beta-galactosyl-1,3)-N-acetylglucosaminidase alpha-2,6-sialyltransferase 4 | chr16 | protein_coding |
| ENSG0000025495.1   | 5.5676781  | 0.0849189  | 0.00015272 | 0.0008987  | 0.47    | 0.47    | 0.00015272 | 0.47   | KOZD941.1    | transcript variant 1                                                                                          | chr16 | lincRNA        |
| ENSG0000014508.11  | 2.2228842  | 0.03204549 | 8.19E-08   | 5.55E-07   | 0.08    | 0.07    | 0.33       | 0.61   | ZNFX300      | zinc finger protein 300                                                                                       | chr16 | protein_coding |
| ENSG0000027308.1   | -2.3180397 | 1.04841374 | 2.45E-13   | 2.3E-09    | 0       | 0       | 0.38       | 0.98   | RP1-201K1    | transcript variant 1                                                                                          | chr16 | lincRNA        |
| ENSG000002738.11   | 3.90783676 | -2.6152287 | 0.00943894 | 0.0246931  | 0.01    | 0       | 0.01       | 0.08   | RP11-305J7   | transcript variant 1                                                                                          | chr16 | lincRNA        |
| ENSG00000104321.9  | -5.2227349 | -1.4452014 | 4.59E-09   | 3.61E-08   | 0.08    | 0.12    | 0.01       | 0      | TRPA1        | transient receptor potential cation channel, subfamily A, member 1                                            | chr16 | protein_coding |
| ENSG00000182324.6  | 1.0228512  | 2.42569794 | 0.00093899 | 0.0010467  | 1.32    | 1.35    | 0.91       | 0.84   | KCMB14       | cosmosch channel, inwardly rectifying subfamily 1, member 14                                                  | chr19 | protein_coding |
| ENSG00000133114.16 | 1.91415901 | 1.483419   | 3.09E-08   | 2.20E-07   | 0.06    | 0.16    | 0.37       | 0.69   | GPLAPP1      | GPLAPP motifs containing 1                                                                                    | chr13 | protein_coding |
| ENSG0000013272.12  | -1.4895958 | 4.22124447 | 7.24E-07   | 4.20E-06   | 6.71    | 7.56    | 3.5        | 3.37   | THGIL        | RNA-histidine guanylyltransferase 1-like (S. cerevisiae)                                                      | chr13 | protein_coding |
| ENSG0000018951.8   | 1.94954659 | 0.20137719 | 6.69E-06   | 3.34E-05   | 0.13    | 0.13    | 0.5        | 0.77   | ZNF557       | zinc finger protein 557                                                                                       | chr19 | protein_coding |
| ENSG00000102108.1  | 1.56224158 | -0.1723688 | 0.00171238 | 0.00532903 | 0.12    | 0.18    | 0.37       | 0.8    | PI4KB        | phosphatidylinositol 4-kinase type 2 beta                                                                     | chr14 | protein_coding |
| ENSG00000169720.1  | 2.14388032 | -1.1389948 | 0.0015583  | 0.00060009 | 0       | 0.26    | 0.49       | 1.05   | CTD-2521M    | transcript variant 1                                                                                          | chr19 | lincRNA        |
| ENSG0000028984.1   | 2.74446279 | -2.5426929 | 0.0014899  | 0.00541921 | 0       | 0.1     | 0.81       | 0.12   | AP004521.1   | transcript variant 1                                                                                          | chr19 | lincRNA        |
| ENSG00000151320.9  | 2.07106092 | -1.5504408 | 0.0013983  | 0.00045609 | 0       | 0.01    | 0.03       | 0.03   | AKAP6        | A kinase (PKA) anchor protein 6                                                                               | chr14 | protein_coding |
| ENSG00000186522.13 | 2.1151382  | 2.2239398  | 1.98E-10   | 2.98E-09   | 0.22    | 0.51    | 0.13       | 3.05   | 10-SEP       | sestria 10                                                                                                    | chr12 | protein_coding |
| ENSG0000016276.15  | 3.92194507 | -2.077274  | 5.08E-05   | 0.00021969 | 0.01    | 0.09    | 0.18       | 0.13   | MORF8        | morfinin-resembling associated 8                                                                              | chr12 | protein_coding |
| ENSG00000138375.11 | -1.1415423 | 4.02565337 | 0.0010828  | 0.00043261 | 4.9     | 6.01    | 3.47       | 3.1    | SMARCA1      | SMN/SMN-related matrix associated, actin dependent regulator of chromatin, subfamily a-like 1                 | chr2  | protein_coding |
| ENSG0000007150.16  | 1.94954659 | 0.20137719 | 6.69E-06   | 3.34E-05   | 0.13    | 0.13    | 0.5        | 0.77   | ZNF557       | zinc finger protein 557                                                                                       | chr19 | protein_coding |
| ENSG0000015529.20  | 1.66328239 | 3.08135507 | 6.54E-08   | 4.50E-07   | 1.13    | 1.18    | 4.82       | 4.92   | GRP75-AS3    | GRP75-AS3 readthrough                                                                                         | chr20 | protein_coding |
| ENSG00000197712.10 | -1.201086  | 3.6510549  | 1.50E-06   | 7.09E-05   | 2.9     | 4.12    | 1.98       | 1.83   | FAM114A1     | family with sequence similarity 114, member A1                                                                | chr4  | protein_coding |
| ENSG00000174745.5  | -1.243685  | 7.03652298 | 3.41E-06   | 1.80E-05   | 72.84   | 67.45   | 38.3       | 0.21   | CATF2        | catenin transcription factor 2                                                                                | chr4  | protein_coding |
| ENSG0000027553.1   | -1.483209  | -1.08003   | 0.0587472  | 0.01613343 | 0.94    | 1.17    | 0.79       | 0.22   | CTB-58E17.3  | transcript variant 3                                                                                          | chr17 | antisense      |
| ENSG0000011626.15  | -4.4867843 | 0.0474009  | 3.92E-17   | 7.48E-16   | 0.36    | 0.3     | 0.04       | 0      | PROM2        | promatin 2                                                                                                    | chr2  | protein_coding |
| ENSG00000250646.10 | 1.637571   | 8.5049652  | 1.89E-09   | 1.38E-07   | 19.33   | 83.89   | 81.89      | 82.88  | DNAI2        | DNA2 associated protein 1                                                                                     | chr19 | protein_coding |
| ENSG00000204528.10 | -1.8114697 | 11.0521133 | 5.94E-10   | 5.34E-09   | 1505.79 | 1349.99 | 554.73     | 529.09 | GNBL2        | guanine nucleotide binding protein (G protein), beta polypeptide 2-like 1                                     | chr5  | protein_coding |
| ENSG00000178902.10 | 5.19377    | 5.8452528  | 1.98E-09   | 1.27E-08   | 16.29   | 18.19   | 58.41      | 79.17  | DCUN1D5      | DCUN1 defective in cullin neddylation 1, domain containing 5                                                  | chr11 | protein_coding |
| ENSG0000022458.6   | 2.5819318  | 3.8313138  | 8.80E-07   | 0.00020255 | 0.08    | 0.21    | 0.45       | 0.56   | TMTD13       | RNA methyltransferase 13 homolog 5 (S. cerevisiae)                                                            | chr1  | protein_coding |
| ENSG0000016982.12  | -1.3459025 | 5.18464684 | 3.98E-06   | 2.08E-05   | 19.72   | 20.21   | 9.75       | 11.21  | TSTP1        | transcript variant 1                                                                                          | chr1  | protein_coding |
| ENSG00000276027.1  | -0.3642923 | 1.0347483  | 0.0010828  | 0.00043261 | 4.9     | 6.01    | 3.47       | 3.1    | SMARCA1      | SMN/SMN-related matrix associated, actin dependent regulator of chromatin, subfamily a-like 1                 | chr2  | protein_coding |
| ENSG0000018908.12  | 1.4709438  | 2.01455707 | 5.38E-06   | 2.74E-05   | 0.22    | 0.23    | 0.61       | 0.16   | PIGP         | phosphatidylinositol glycan anchor biosynthesis, class P                                                      | chr21 | protein_coding |
| ENSG0000010506.18  | 2.2065141  | -0.404534  | 3.69E-06   | 1.93E-05   | 0.04    | 0.1     | 0.12       | 0.18   | WAF2C2       | nuclear factor of activated T-cells, cytoplasmic, calcineurin-dependent 2                                     | chr20 | protein_coding |
| ENSG00000126603.7  | 1.2169879  | 5.53704167 | 8.75E-13   | 3.13E-11   | 14.4    | 13.5    | 4.44       | 1.9    | GUSL4        | GUSL4 family zinc finger 2                                                                                    | chr15 | protein_coding |
| ENSG000002778.12   | 2.71911887 | -1.067754  | 5.07E-06   | 2.60E-05   | 0.41    | 0       | 1.73       | 2.1    | RP11-775C2   | transcript variant 2                                                                                          | chr15 | lincRNA        |
| ENSG00000125691.11 | -1.0006407 | 9.6251043  | 0.00048071 | 0.00188228 | 278.22  | 271.68  | 176.37     | 190.18 | RLP23        | ribosomal protein L23                                                                                         | chr17 | protein_coding |
| ENSG00000107222.17 | 1.637571   | 8.5049652  | 1.89E-09   | 1.38E-07   | 19.33   | 83.89   | 81.89      | 82.88  | DNAI2        | DNA2 associated protein 1                                                                                     | chr19 | protein_coding |
| ENSG00000137573.12 | -8.3722983 | -0.6245513 | 1.29E-16   | 2.10E-15   | 0.27    | 0.05    | 0          | 0      | SULF1        | sulfatase 1                                                                                                   | chr8  | protein_coding |
| ENSG00000165629.11 | 2.14844417 | -0.1373907 | 2.21E-07   | 1.41E-06   | 0.02    | 0.06    | 0.09       | 0.45   | TCN4         | tandem C2 domains, nuclear                                                                                    | chr14 | protein_coding |
| ENSG00000147124.11 | 1.4382741  | 0.4593467  | 0.0012743  | 0.00020255 | 0.08    | 0.21    | 0.45       | 0.56   | ZNF46        | zinc finger protein 46                                                                                        | chr1  | protein_coding |
| ENSG00000163191.5  | -1.6671328 | 4.5722619  | 1.08E-08   | 8.20E-08   | 628.56  | 830.72  | 349.77     | 259.11 | S100A11      | S100 calcium binding protein A11                                                                              | chr1  | protein_coding |
| ENSG00000164330.15 | 1.4829195  | -1.7842079 | 0.0010828  | 0.00043261 | 4.9     | 6.01    | 3.47       | 3.1    | SMARCA1      | SMN/SMN-related matrix associated, actin dependent regulator of chromatin, subfamily a-like 1                 | chr2  | protein_coding |
| ENSG00000123443.11 | -7.6965424 | 3.1473065  | 6.63E-18   | 4.4E-15    | 14.02   | 8.79    | 0.05       | 0.09   | C4BPB        | complement component 4-binding protein, beta                                                                  | chr1  | protein_coding |
| ENSG00000231728.3  | 5.44044058 | -2.7547732 | 0.0029052  | 0.00856312 | 0       | 0       | 0          | 0.25   | LIDNKC01-1   | transcript variant 1                                                                                          | chr1  | antisense      |
| ENSG0000008566.11  | 1.8429195  | -1.0407683 | 6.63E-12   | 7.96E-11   | 0.2     | 0.02    | 0.01       | 0.02   | SYN1         | synapsin 1                                                                                                    | chr11 | protein_coding |
| ENSG00000125830.1  | -1.286006  | 2.260E-07  | 1.32E-06   | 0.08       | 0       | 0.83    | 1.1        | 11     | RP11-3150E6  | transcript variant 6                                                                                          | chr11 | antisense      |
| ENSG00000149531.13 | -4.662729  | 0.9013842  | 2.51E-23   | 7.69E-22   | 2.12    | 3.51    | 0.25       | 0.05   | FRG18        | FRSH region gene 1 family, member B                                                                           | chr10 | protein_coding |
| ENSG0000015116.8   | 1.637571   | 8.5049652  | 1.89E-09   | 1.38E-07   | 19.33   | 83.89   | 81.89      | 82.88  | DNAI2        | DNA2 associated protein 1                                                                                     | chr19 | protein_coding |
| ENSG00000189897.10 | 2.28521885 | 0.89879837 | 1.54E-09   | 1.32E-08   | 0.04    | 0.19    | 0.61       | 0.86   | NEDD1        | neural precursor cell expressed, developmentally down-regulated 1                                             | chr12 | protein_coding |
| ENSG0000017488.11  | 1.2631898  | 2.5540945  | 4.92E-05   | 0.00020141 | 0.42    | 0.72    | 1.87       | 1.77   | FRW8         | fork-box and WD repeat domain containing 8                                                                    | chr12 | protein_coding |
| ENSG00000107042.11 | 1.4382741  | 0.4593467  | 0.0012743  | 0.00020255 | 0.08    | 0.21    | 0.45       | 0.56   | TMTD13       | RNA methyltransferase 13 homolog 5 (S. cerevisiae)                                                            | chr1  | protein_coding |
| ENSG0000027555.11  | 1.2429843  | 5.13536697 | 2.00E-05   | 9.20E-05   | 22.81   | 17.75   | 6.22       | 6.65   | GFN5         | GFN5-like 5                                                                                                   | chr16 | protein_coding |
| ENSG0000017282.6   | 4.5021293  | -1.7842079 | 0.0010828  | 0.00043261 | 4.9     | 6.01    | 3.47       | 3.1    | SMARCA1      | SMN/SMN-related matrix associated, actin dependent regulator of chromatin, subfamily a-like 1                 | chr2  | protein_coding |
| ENSG0000010388.14  | 2.74854268 | 3.80057526 | 3.86E-18   | 7.99E-17   | 0.46    | 0.32    | 3.48       | 3.55   | CMIP         | cell migration inducing protein, hvaluronan binding                                                           | chr15 | protein_coding |
| ENSG00000139139.9  | -3.26662   | -1.0182238 | 3.09E-08   | 2.20E-07   | 0.04    | 0.05    | 0.01       | 0      | DNAH5        | dynamin, axonemal, heavy chain 5                                                                              | chr5  | protein_coding |
| ENSG0000018770.5   | 1.0081671  | 1.6102022  | 0.0010828  | 0.00043261 | 4.9     | 6.01    | 3.47       | 3.1    | SMARCA1      | SMN/SMN-related matrix associated, actin dependent regulator of chromatin, subfamily a-like 1                 | chr2  | protein_coding |
| ENSG00000231536.1  | 1.9311289  | -1.568623  | 0.0006303  | 0.0020807  | 0.32    | 0       | 0.64       | 1.06   | AC123886.2   | transcript variant 2                                                                                          | chr14 | antisense      |
| ENSG00000189070.9  | -3.1101013 | -0.5266283 | 1.01E-09   | 8.82E-09   | 0.02    | 0.04    | 0          | 0      | RLR2         | ribonucleon leucine rich transmembrane protein 2                                                              | chr14 | protein_coding |
| ENSG0000018377.15  | 1.637571   | 8.5049652  | 1.89E-09   | 1.38E-07   | 19.33   | 83.89   | 81.89      | 82.88  | DNAI2        | DNA2 associated protein 1                                                                                     | chr19 | protein_coding |
| ENSG00000225891.1  | 2.99529641 | -2.6745053 | 0.00943894 | 0.0246931  | 0       | 0       | 0.05       | 0.18   | APR2-476K3.3 | transcript variant 3                                                                                          | chr1  | antisense      |
| ENSG0000012465.6   | -1.5309821 | 6.1484682  | 1.53E-07   | 1.00E-06   | 90.78   | 85.59   | 43.09      | 38.02  | ARL2         | ADP-ribosylation factor-like 2                                                                                | chr11 | protein_coding |
| ENSG0000025168.1   | 1.3111228  | 0.00015272 | 0.0008987  | 0.0008987  | 0       | 0       | 0.05       | 0      | CASC19       | cancer susceptibility candidate 19 (non-protein coding)                                                       | chr1  | antisense      |
| ENSG00000174258.8  | -1.8476241 | 4.85059427 | 5.51E-10   | 4.98E-09   | 24.97   | 21.3    | 8.82       | 8.31   | ZNF581       | zinc finger protein 581                                                                                       | chr19 | protein_coding |
| ENSG0000017261.5   | 2.8565956  | -0.9672566 | 3.95E-05   | 0.00012733 | 0.03    | 0.48    | 0.8        | 0.57   | CFAP53       | cat and flagella associated protein 53                                                                        | chr18 | protein_coding |
| ENSG0000015188.8   | 1.9213610  | 0.2901761  | 3.41E-01   | 2.74E-08   | 0.09    | 0.59    | 3.72       | 3.25   | CMPS         | guanosine monophosphate reductase 5                                                                           | chr1  | protein_coding |
| ENSG00000243477.4  | -1.009728  | 3.70715429 | 0.0004818  | 0.00220298 | 7.61    | 6.99    | 5.14       | 4.09   | NAT6         | N-acetyltransferase 6 (GCN5-related)                                                                          | chr1  | protein_coding |
| ENSG0000008960.10  | 1.9213610  | 0.2901761  | 3.41E-01   | 2.74E-08   | 0.09    | 0.59    | 3.72       | 3.25   | CMPS         | guanosine monophosphate reductase 5                                                                           | chr1  | protein_coding |
| ENSG00000157168.17 | 1.0464485  | 0.88920406 | 0.00288877 | 0.00879425 | 0.12    | 0.08    | 0.18       | 0.38   | NRC1         | neurexin 1                                                                                                    | chr16 | protein_coding |
| ENSG00000187808.4  | 5.3556893  | 0.9797384  | 3.32E-25   | 1.18E-23   | 0.03    | 0.05    | 2.66       | 2.39   | SOX4HD       | sox4 homologous ankyrin repeat domain family D                                                                | chr1  | protein_coding |
| ENSG0000013025.11  | 1.3111228  | 0.00015272 | 0.0008987  | 0.0008987  | 507.19  | 566.89  | 294.7      | 294.75 | RP11-305J7   | transcript variant 1                                                                                          | chr15 | lincRNA        |
| ENSG00000128965.10 | -1.6143027 | 4.28983629 | 5.84E-08   | 4.05E-07   | 11.88   | 11.29   | 5.95       | 4.1    | CHAC1        | Chac diathione-specific domain-oligomannosyltransferase 1                                                     | chr15 | protein_coding |
| ENSG0000013368.14  |            |            |            |            |         |         |            |        |              |                                                                                                               |       |                |



|                    |            |            |            |            |        |        |        |        |              |                                                                          |                                                                   |                         |                |
|--------------------|------------|------------|------------|------------|--------|--------|--------|--------|--------------|--------------------------------------------------------------------------|-------------------------------------------------------------------|-------------------------|----------------|
| ENSG0000024659.6   | -1.0263624 | 5.13447156 | 0.00039154 | 0.00139818 | 27.36  | 0      | 26.08  | 15.46  | 19.6         | TBBC                                                                     | tubulin folding cofactor- (Y)                                     | chv6                    | protein_coding |
| ENSG00000273034.1  | -1.3787282 | -2.9446611 | 0.00000000 | 0.00000000 | 0      | 0      | 0      | 0      | 0            | RFP11-1756K                                                              |                                                                   | chv6                    | TEC            |
| ENSG0000015740.18  | 1.92718826 | 3.21316122 | 5.71E-10   | 5.14E-09   | 0.25   | 0.4    | 1.44   | 1.44   | 1.85         | DYRK1A                                                                   | dual-specificity tyrosine-(Y)-phosphorylation regulated kinase 1A | chv12                   | protein_coding |
| ENSG000002518182.8 | -44755733  | -0.518271  | 8.36E-14   | 1.18E-12   | 0.06   | 0.06   | 0      | 0      | 0            | MUC5AC                                                                   | mucin 5AC, oligomer mucous/gel-forming                            | chv11                   | protein_coding |
| ENSG00000273969.17 | 1.3333345  | 3.1333345  | 4.58E-05   | 4.76E-05   | 0.45   | 0.45   | 0      | 0      | 589          | NFST                                                                     | N-ethylmaleimide-sensitive factor                                 | chv12                   | protein_coding |
| ENSG0000006361.31  | 4.3181262  | 3.3626934  | 8.74E-34   | 4.83E-32   | 0.09   | 0.12   | 3.08   | 2.55   | 18R83        | erb-B receptor tyrosine kinase 3                                         | chv12                                                             | protein_coding          |                |
| ENSG00000247446.4  | 6.33097282 | -2.1624822 | 8.95E-06   | 4.38E-05   | 0      | 0      | 0.08   | 0.07   | UGSP1        | ubiquitin specific peptidase 51                                          | chvX                                                              | protein_coding          |                |
| ENSG00000156709.12 | 6.86313733 | 3.1333345  | 0.00000000 | 0.00000000 | 41.24  | 38.61  | 0      | 0      | 26.1         | ARAF1                                                                    | acetoacetic acid decarboxylase, mitochondrial-associated, 1       | chv1                    | protein_coding |
| ENSG00000155339.9  | -6.4354995 | -2.265336  | 5.19E-06   | 2.66E-05   | 0.04   | 0.06   | 0      | 0      | 0            | TACR1                                                                    | tachykinin receptor 1                                             | chv2                    | protein_coding |
| ENSG00000197631.1  | 1.22289253 | 2.6103636  | 5.31E-05   | 0.00022336 | 1.93   | 0.96   | 2.86   | 4.21   | TNNR3D       | tetranin reductase 3                                                     | chv3                                                              | protein_coding          |                |
| ENSG0000046401.15  | 3.1333345  | 6.20191742 | 5.45E-06   | 2.78E-05   | 0.07   | 0.07   | 20.74  | 181.89 | CTSA         | cathesin A                                                               | chv20                                                             | protein_coding          |                |
| ENSG00000289564.1  | 1.3788992  | -1.0804627 | 0.00224023 | 0.00360662 | 0.78   | 0.25   | 1.4    | 2.22   | MAN2C1       | mannosidase, alpha class 2C, member 1                                    | chv15                                                             | crossed transcript      |                |
| ENSG0000027724.1   | 181.68437  | 0.31147108 | 5.40E-06   | 2.78E-05   | 0.98   | 1.19   | 6.14   | 0.47   | HSIT2H       | histone cluster 1, H2b                                                   | chv1                                                              | protein_coding          |                |
| ENSG0000045241.9   | 2.8986454  | 0.34049002 | 4.23E-11   | 4.41E-10   | 0.02   | 0.04   | 0.18   | 0.46   | CNCPG        | centromeres protein C                                                    | chv12                                                             | protein_coding          |                |
| ENSG00000257509.1  | 3.496945   | -2.3667948 | 0.0011221  | 0.00364442 | 0      | 0.05   | 0.42   | 0.51   | RP11-76217-1 |                                                                          | chv12                                                             | sense_intronic          |                |
| ENSG00000202734.9  | -1.05601   | 6.5172228  | 0.0034949  | 0.00301296 | 50.26  | 59.01  | 28.02  | 42.32  | STRAP        | serine/threonine kinase receptor associated protein                      | chv12                                                             | protein_coding          |                |
| ENSG00000165476.11 | 1.55475132 | 3.29202346 | 3.50E-07   | 2.17E-06   | 0.58   | 0.96   | 2.29   | 3.73   | REEF3        | receptor accessory protein 3                                             | chv10                                                             | protein_coding          |                |
| ENSG0000049696.12  | -1.1081664 | 9.06209204 | 0.0001147  | 0.00045549 | 237.63 | 235.33 | 143.19 | 149.28 | CLPTM1L      | CLPTM1-like                                                              | chv5                                                              | protein_coding          |                |
| ENSG0000017616.16  | 2.1961242  | 12.1066319 | 2.61E-12   | 3.14E-11   | 0.82   | 1.24   | 4.89   | 7.73   | ESRP1        | arginine/serine-rich protein 1                                           | chv1                                                              | protein_coding          |                |
| ENSG00000108379.8  | 3.1704607  | 2.69363074 | 2.13E-05   | 9.71E-05   | 0.66   | 1.11   | 2.89   | 2.96   | WN13         | wntless-type MMVT interaction site family, member 3                      | chv17                                                             | protein_coding          |                |
| ENSG00000290802.1  | 2.19451222 | 2.24082143 | 3.00E-11   | 3.19E-10   | 12.84  | 23.05  | 109.34 | 108.93 | MT-IT1       | mitochondrially encoded tRNA leucine 1 (UAU/G)                           | chv17                                                             | protein_coding          |                |
| ENSG0000026498.1   | 5.07737531 | -2.9633201 | 0.0038165  | 0.00488951 | 0      | 0.1    | 0.16   | 0.14   | 0.08         | RP11-459M2                                                               |                                                                   | chv17                   | lncRNA         |
| ENSG00000272973.1  | -3.8872927 | -2.443399  | 0.0066294  | 0.00226478 | 0.61   | 0.05   | 0.75   | 0      | 0            | K6-112SA3.1                                                              |                                                                   | chv22                   | antisense      |
| ENSG00000157111.1  | 2.5063961  | 2.8195952  | 2.94E-13   | 3.89E-12   | 1.27   | 1.13   | 7.78   | 6.57   | TMEM71       | transmembrane protein 171                                                | chv5                                                              | protein_coding          |                |
| ENSG00000103531.3  | 5.2829886  | 1.7350642  | 1.83E-20   | 4.37E-19   | 54.9   | 54.9   | 0      | 0      | 4756         | FOXO2D2                                                                  | FAD-dependent oxidoreductase domain containing 2                  | chv2                    | protein_coding |
| ENSG00000117697.13 | 10.2224872 | 1.5065787  | 0.00203474 | 0.006229   | 0.44   | 0.41   | 0.93   | 1.4    | NSL1         | NSL1, MIS12 kinetochore complex component                                | chv1                                                              | protein_coding          |                |
| ENSG00000136811.11 | 3.4003047  | 3.107903   | 1.06E-23   | 3.42E-22   | 0.01   | 0.16   | 1.14   | 2.41   | REK2         | iron-responsive element binding protein 2                                | chv15                                                             | protein_coding          |                |
| ENSG00000186497.7  | -6.011925  | 1.2174639  | 3.52E-22   | 1.01E-30   | 0.7    | 0.73   | 0      | 0.03   | GNCG         | guanine nucleotide binding protein (G protein), gamma 2                  | chv14                                                             | protein_coding          |                |
| ENSG00000161511.11 | -2.9473292 | 6.7281532  | 6.64E-22   | 1.84E-20   | 56.7   | 4.95   | 94.3   | 8.91   | RN1L         | Ras and Rab interactor 1                                                 | chv11                                                             | protein_coding          |                |
| ENSG0000044785.12  | -1.8784515 | 5.84750334 | 1.95E-10   | 1.87E-09   | 21.41  | 21.07  | 7.66   | 0.13   | ZNF577       | zinc finger protein 577                                                  | chv19                                                             | protein_coding          |                |
| ENSG0000016315.10  | -1.4549596 | 4.60412758 | 8.13E-07   | 4.74E-06   | 11.42  | 115.7  | 5.8    | 5.36   | LYSM1        | lysyl, putative peptidocarbonyl-binding, domain containing 1             | chv19                                                             | protein_coding          |                |
| ENSG00000274487.1  | 6.0504082  | 0.86810729 | 8.12E-07   | 3.15E-05   | 0.03   | 0.02   | 1.11   | 1.31   | RP11-45121.1 |                                                                          | chv19                                                             | protein_coding          |                |
| ENSG00000270991.1  | 6.63760135 | -1.9357476 | 6.25E-07   | 3.72E-06   | 0      | 0      | 0.8    | 0      | 0            | RP11-78072-1                                                             |                                                                   | chv17                   | lncRNA         |
| ENSG0000024606.2   | 6.5606     | 5.3334744  | 0.00028768 | 0.0009318  | 68.82  | 63.5   | 46.95  | 37.71  | HUGO         | HUG1 hypoxia inducible domain family, member 2A                          | chv17                                                             | protein_coding          |                |
| ENSG00000235315.1  | -1.7099941 | -1.576721  | 0.11E-09   | 9.01E-09   | 0.07   | 1.09   | 0      | 0      | UNCO1518     | long interspersed non-protein coding RNA 1518                            | chv10                                                             | lncRNA                  |                |
| ENSG00000165630.12 | 1.68590064 | 2.18449056 | 2.00E-07   | 1.28E-05   | 0.51   | 1.44   | 3.26   | 5.08   | RRP18        | pre-mRNA processing factor 18                                            | chv10                                                             | protein_coding          |                |
| ENSG0000017725.15  | 6.16319027 | 1.7350642  | 0.0007416  | 0.00034039 | 1.53   | 15.03  | 24.51  | 2.46   | PDCC1        | Parkinson disease 7 domain containing 1                                  | chv11                                                             | protein_coding          |                |
| ENSG00000271129.8  | -2.3141844 | 3.00698801 | 2.69E-13   | 3.37E-12   | 11.38  | 60.1   | 2.32   | 2.35   | EDN2         | endothelin 2                                                             | chv1                                                              | protein_coding          |                |
| ENSG0000015494.7   | -4.2189588 | 10.4005471 | 7.54E-39   | 5.40E-37   | 224.81 | 232.05 | 167    | 15.96  | FN1          | fibronectin                                                              | chv2                                                              | protein_coding          |                |
| ENSG00000062636.11 | 2.9447289  | 3.64849173 | 2.41E-10   | 5.00E-08   | 1.3    | 4.52   | 0      | 0.57   | DDX18        | DEAD (Asp-Glu-Ala-Asp) box polypeptide 18                                | chv2                                                              | protein_coding          |                |
| ENSG0000036357.16  | 1.28248313 | -1.4868108 | 0.00061439 | 0.00211279 | 0.03   | 0.07   | 0.33   | 0.33   | CEBP6        | CCAAT/enhancer binding protein (CEBP), epsilon                           | chv14                                                             | protein_coding          |                |
| ENSG0000010306.16  | 3.72752041 | 0.1349546  | 1.17E-13   | 1.62E-12   | 0.02   | 0.03   | 0.17   | 0.12   | SGO2L        | shc-like protein 2 (S. pombe)                                            | chv14                                                             | protein_coding          |                |
| ENSG00000171034.1  | -2.1249443 | -2.8887783 | 0.0038165  | 0.00488951 | 0.24   | 0.24   | 0      | 0.21   | RP11-419B17  |                                                                          | chv6                                                              | lncRNA                  |                |
| ENSG00000119405.12 | 3.17484261 | -1.9503366 | 0.00016274 | 0.00062431 | 0.01   | 0      | 0.06   | 0.11   | UGA          | leucine 4                                                                | chv13                                                             | protein_coding          |                |
| ENSG0000026566.2   | 1.82746309 | -0.0871525 | 1.91E-05   | 8.80E-05   | 0.07   | 0.15   | 0.54   | 0.5    | RP11-206G3-1 |                                                                          | chv16                                                             | 3prime-overlapping_nona |                |
| ENSG00000168917.8  | 1.08896336 | 2.93711961 | 0.0007416  | 0.00034039 | 1.53   | 15.03  | 24.51  | 6.8    | SLC35C2      | solute carrier family 35, member G2                                      | chv17                                                             | protein_coding          |                |
| ENSG00000118860.11 | 1.27026566 | 6.89881273 | 1.12E-05   | 5.38E-05   | 30.36  | 33.94  | 90.13  | 117.11 | MYL12B       | myosin, light chain 12B, regulatory                                      | chv18                                                             | protein_coding          |                |
| ENSG00000180710.13 | 2.2141454  | 0.0017076  | 0.0007416  | 0.00034039 | 1.53   | 15.03  | 24.51  | 6.8    | CTP29D       | centrosomal protein 29DQ4                                                | chv18                                                             | protein_coding          |                |
| ENSG0000012304.9   | 1.1183345  | 4.5280803  | 0.00012399 | 0.00050989 | 5.05   | 6.6    | 351    | 3.63   | ACOT13       | acyl-CoA thioesterase 13                                                 | chv18                                                             | protein_coding          |                |
| ENSG00000187601.4  | -3.2389362 | -2.2710156 | 0.00108225 | 0.0035312  | 0.16   | 0.16   | 0.02   | 0.02   | MAGEH1       | melanoma antigen family H1                                               | chv18                                                             | protein_coding          |                |
| ENSG00000186339.7  | -1.1900467 | 2.15E-06   | 1.57E-07   | 0          | 0.27   | 0.2    | 0.05   | 0.01   | TCN4         | transcobalamin II                                                        | chv22                                                             | protein_coding          |                |
| ENSG00000133083.13 | -4.3861857 | -1.4146018 | 2.42E-08   | 1.75E-07   | 0.04   | 0.07   | 0.01   | 0      | DCXK1        | doulacortin-like kinase 1                                                | chv13                                                             | protein_coding          |                |
| ENSG00000188959.6  | -2.9691886 | -0.9149711 | 1.36E-07   | 8.82E-07   | 0.67   | 0.21   | 0.02   | 0.07   | FAM78F       | family with sequence similarity 78, member B                             | chv1                                                              | protein_coding          |                |
| ENSG0000024117.2   | 1.8249149  | 1.6289164  | 1.39E-07   | 1.36E-06   | 11.3   | 14.5   | 5.45   | 5.05   | RNASEH1A     | RNAse H1, antisense RNA 1                                                | chv1                                                              | protein_coding          |                |
| ENSG00000209108.19 | 2.09631944 | 1.63638382 | 1.19E-09   | 1.03E-08   | 0.44   | 0.32   | 1.68   | 2.68   | SCFD1        | sccl family domain containing 1                                          | chv14                                                             | protein_coding          |                |
| ENSG00000268713.1  | 2.24976171 | 0.35307282 | 5.79E-08   | 4.01E-07   | 0.19   | 0.29   | 1.04   | 2.01   | CT-444N24-1  |                                                                          | chv19                                                             | lncRNA                  |                |
| ENSG00000109826.12 | 1.5447719  | 0.42020438 | 1.61E-07   | 1.13E-12   | 0.13   | 0.13   | 5.45   | 6.81   | MPF19        | peripheral myelin protein 19                                             | chv17                                                             | protein_coding          |                |
| ENSG00000214940.7  | -4.8073937 | -3.2306674 | 0.00189873 | 0.00419567 | 0.03   | 0.07   | 0      | 0      | NPR4B        | nuclear pore complex interacting protein family, member A8               | chv16                                                             | protein_coding          |                |
| ENSG00000104933.12 | 1.27417895 | 0.73502485 | 0.0007416  | 0.00034039 | 1.53   | 15.03  | 24.51  | 6.8    | DMAL2        | deaf 2                                                                   | chv25                                                             | protein_coding          |                |
| ENSG00000079482.12 | 1.0605995  | 1.77352262 | 0.00104254 | 0.00341232 | 0.21   | 0.23   | 0.55   | 0.69   | OPHN1        | oligochannel 1                                                           | chv22                                                             | protein_coding          |                |
| ENSG00000277971.11 | 1.4062639  | 1.70273736 | 1.91E-05   | 8.80E-05   | 24.9   | 1.85   | 7.26   | 8.16   | USCBP-BS62   | ultrastructural core-binding protein 2                                   | chv22                                                             | protein_coding          |                |
| ENSG00000186767.3  | 2.64125019 | 0.4318886  | 6.52E-14   | 2.53E-09   | 0.1    | 1.1    | 0      | 0.86   | HIST2H4G     | histone cluster 1, H2ag                                                  | chv1                                                              | protein_coding          |                |
| ENSG00000198346.9  | -4.7336662 | -1.804509  | 1.01E-06   | 5.06E-06   | 0.04   | 0.08   | 0.01   | 0      | ZNF813       | zinc finger protein 813                                                  | chv19                                                             | protein_coding          |                |
| ENSG00000189079.14 | 1.89884473 | 1.62199709 | 2.81E-08   | 2.02E-07   | 0.11   | 0.12   | 0.07   | 0.58   | ARID2        | AT1 rich interactive domain 2 (ARID, RFX-like)                           | chv12                                                             | protein_coding          |                |
| ENSG0000013133.9   | 1.9248728  | 1.9248728  | 3.72E-06   | 2.63E-05   | 5.45   | 28.6   | 0      | 24.5   | HNRT2        | histone triad nucleotide-binding protein 2                               | chv19                                                             | protein_coding          |                |
| ENSG00000235363.2  | 5.3327207  | -2.815818  | 0.00292027 | 0.00856312 | 0      | 0      | 0.07   | 0.11   | NOG2-1-AS1   | NOG2-1 antisense RNA 1                                                   | chv14                                                             | antisense               |                |
| ENSG0000056548.16  | 1.07108307 | 3.66214148 | 0.00031301 | 0.00113536 | 2.76   | 3.38   | 5.56   | 11.77  | ZC3H15       | zinc finger CCHC-type containing 15                                      | chv19                                                             | protein_coding          |                |
| ENSG00000138446.10 | 1.90204227 | 0.00271598 | 0.0007416  | 0.00034039 | 1.53   | 15.03  | 24.51  | 6.8    | ITGA7        | integrin alpha 7                                                         | chv12                                                             | protein_coding          |                |
| ENSG00000279406.1  | 1.68021612 | 2.10959701 | 2.30E-07   | 1.46E-06   | 0.77   | 0.76   | 0.77   | 2.99   | RP11-327E2   |                                                                          | chv10                                                             | TEC                     |                |
| ENSG00000198861.6  | -10.40879  | 1.3524481  | 1.73E-38   | 1.21E-36   | 2.48   | 2.48   | 0      | 0      | MAGEA1       | melanoma antigen family A1                                               | chvX                                                              | protein_coding          |                |
| ENSG00000147016.16 | -2.1239464 | 5.5370255  | 1.39E-06   | 1.36E-05   | 14.59  | 13.02  | 2.28   | 1.94   | ATP2AP4      | ATPase, Ca++ transporting, ubiquitous                                    | chvX                                                              | protein_coding          |                |
| ENSG00000175093.4  | 8.2761737  | -0.559313  | 4.08E-15   | 6.58E-14   | 0      | 0      | 0.41   | 0.46   | SPR54        | spRNA/lysine receptor domain and SOCS box containing 4                   | chv10                                                             | protein_coding          |                |
| ENSG00000158111.1  | 1.0007682  | 1.7546385  | 0.0007416  | 0.00034039 | 1.53   | 15.03  | 24.51  | 6.8    | CFR3         | cellular fibronectin receptor 3                                          | chv10                                                             | protein_coding          |                |
| ENSG0000017045.11  | -1.0737721 | 7.6168059  | 0.00018753 | 0.00071119 | 44.63  | 39.36  | 25.4   | 27.85  | HARS         | histidyl-tRNA synthetase                                                 | chv1                                                              | protein_coding          |                |
| ENSG0000009284.12  | 9.0744289  | 0.4241563  | 1.61E-79   | 1.04E-76   | 0.17   | 0.17   | 30.34  | 30.34  | H2AFY2       | H2A histone family, member Y2                                            | chv10                                                             | protein_coding          |                |
| ENSG00000139319.11 | 1.79687    | 2.9713148  | 0.0007416  | 0.00034039 | 1.53   | 15.03  | 24.51  | 6.8    | SEPRNE2      | SEPRN2, plasminogen activator inhibitor type 11 member 2                 | chv16                                                             | protein_coding          |                |
| ENSG0000018777.9   | 4.36185332 | 5.0079062  | 2.98E-18   | 6.25E-17   | 0.04   | 0      | 0.58   | 0.55   | ABCC2        | ATP-binding cassette, sub-family G (WHITE), member 2 (Unimultibid auroc) | chv1                                                              | protein_coding          |                |
| ENSG0000020370.11  | 1.96315654 | -0.8781721 | 0.00024665 | 0.00091688 | 0.03   | 0.06   | 0.11   | 0.39   | GORAB        | golgin, RAB6-interacting                                                 | chv1                                                              | protein_coding          |                |
| ENSG00000171034.1  | 2.1085139  | 0.5466943  | 7.59E-08   | 5.17E-07   | 0      |        |        |        |              |                                                                          |                                                                   |                         |                |

ENSG00000197275.11 1.69326667 0.1894749 3.00E-05 0.0003327 0.05 0.11 0.26 0.43 RAD54B RAD54 homolog B (S. cerevisiae) chr8 protein\_coding  
ENSG00000237436.1 1.70859176 1.173908 0.0000000 0.0000000 0.0 0.0 0.0 0.08 RP11-312Z8.1 antisense chr8 antisense  
ENSG0000018482.0 2.043749 2.23665741 4.36E-01 4.01E-09 0.2 0.12 0.66 1.13 PHF3 PHD finger protein 3 chr6 protein\_coding  
ENSG0000028695.1 5.59464701 2.4625875 0.0008654 0.0028128 0 0 0.083 0.31 RP11-36C1L.1 -- chr10 protein\_coding  
ENSG00000243616.1 5.9426212 1.0435202 0.0000000 0.0000000 0.0 0.0 0.0 0.06 RITA-AS1 RITA antisense chr15 IG\_V\_gene  
ENSG00000060749.13 2.7314429 1.57393631 4.08E-14 5.93E-13 0.07 0.05 0.38 0.73 CSEK1 glutamine and serine rich 1 chr11 antisense  
ENSG00000171236.9 -3.7937177 -2.5308865 0.0012121 0.0036442 0.07 0.06 0.01 0.0 LRG1 leucine-rich alpha-2-glycoprotein 1 chr19 protein\_coding  
ENSG0000013027.16 5.44446467 1.54446467 6.87E-05 0.0028404 29.84 36.92 22.91 RP11-36C1L.1 chondrichthyan/human N-methyltransferase chr17 protein\_coding  
ENSG0000043473.0 -3.1975599 0.1068132 5.06E-12 5.88E-11 0.11 0.22 0.01 0.03 KCHN1 potassium channel, voltage gated acid related subfamily H, member 1 chr1 protein\_coding  
ENSG0000035499.11 1.47429292 1.51362226 1.19E-05 1.69E-05 0.36 0.59 1.33 12.22 ZEPFIC18 DEF domain containing 18 chr10 protein\_coding  
ENSG0000015935.14 1.0000000 1.0000000 0.0000000 0.0000000 194.29 147.97 133.28 PTM5 parathyromin chr12 protein\_coding  
ENSG00000108242.11 -5.0206302 -3.1369696 0.0010455 0.02582742 0.06 0.02 0 0 0 CYP2C18 cytochrome P450, family 2, subfamily C, polypeptide 18 chr10 protein\_coding  
ENSG0000017906.12 2.9556323 4.96992 3.82E-07 9.23E-19 0.79 1.1 6.34 12.29 KC02 potassium channel 2, EF-hand calcium binding domain chr10 protein\_coding  
ENSG0000048848.13 -2.3242381 3.2959631 1.17E-13 1.61E-12 1.1 1.84 0.3 0.48 ADAM12 ADAM metalloproteinase domain 12 chr10 protein\_coding  
ENSG0000042723.13 -2.1136623 1.15805853 8.51E-13 1.07E-11 99.3 85.39 296.24 272.62 RPS3 ribosomal protein S3 chr11 protein\_coding  
ENSG00000165025.13 7.1977764 1.4908265 6.56E-06 1.55E-08 0 0 0.14 0.09 DYK dyk domain chr11 protein\_coding  
ENSG0000021496.11 -2.1338367 3.3821532 5.53E-12 6.41E-11 1.85 1.7 0.56 0.51 TREFR1 transcriptional regulating factor 1 chr6 protein\_coding  
ENSG0000023409.6 5.9435985 -2.4328306 0.0001482 0.0057423 0 0 0.09 0.24 AC006547.1 -- chr22 protein\_coding  
ENSG00000279516.1 1.1892955 -2.4398964 4.74E-05 0.0020301 0.11 0.12 0 0 0 FAM23C family with sequence similarity 230, member C chr19 protein\_coding  
ENSG00000137273.3 -1.1118312 4.8677855 0.00013294 0.0005291 15.15 14.37 8.06 1.02 FOXF2 forkhead box F2 chr10 protein\_coding  
ENSG0000044369.11 6.0599572 -1.5545337 1.05E-06 6.02E-06 0 0 0.05 0.08 FAM1718 family with sequence similarity 171, member B chr17 protein\_coding  
ENSG0000015946.13 1.86422106 1.5274796 0.0027343 0.0031796 0.03 0.02 0.14 0.06 ACE angiotensin I converting enzyme chr17 protein\_coding  
ENSG00000078124.0 2.2760238 2.376787 4.05E-12 4.75E-11 0.16 0.22 0.08 0.15 ACER3 alkaline ceramidase 3 chr11 protein\_coding  
ENSG00000162367.0 5.98373061 2.4897568 8.36E-05 0.00394652 0 0 0.09 0.04 TAL1 T-cell acute lymphocytic leukemia 1 chr10 protein\_coding  
ENSG0000027108.1 2.36193899 2.9791669 5.34E-05 0.0022954 0.03 0.09 0.09 0.64 RP11-25BC1.1 -- chr19 protein\_coding  
ENSG0000017831.5 -2.9917674 3.0140847 8.85E-20 2.09E-18 9.53 8.7 1.68 1.37 CTNN1 catenin 1 chr19 protein\_coding  
ENSG0000010337.14 1.0213739 7.58003119 0.0394854 0.00125643 24.07 23.76 6.11 61.61 TM554 transmembrane 9 superfamily protein member 4 chr20 protein\_coding  
ENSG0000012801.14 1.1666265 2.6759865 0.00015457 0.00059573 0.67 0.62 1.63 2.26 GZF1 GDNF-inducible zinc finger protein 1 chr20 protein\_coding  
ENSG0000017290.18 6.03134248 -2.373212 8.36E-05 0.0034052 0 0 0.04 0.07 AQPPEP -- chr5 protein\_coding  
ENSG0000018169.6 2.1550219 -2.7738294 0.0004801 0.0226235 0.01 0.05 0.0 0.01 PLAC1 pleomorphic adenoma gene 1 chr5 protein\_coding  
ENSG00000106772.16 -5.6609181 -2.7818379 0.0008564 0.0028128 0 0 0.02 0 0 0 PRUNE2 pruned homology 2 (Drosophila) chr9 protein\_coding  
ENSG0000044959.8 2.12079085 1.8783336 3.69E-10 3.43E-09 0.15 0.31 0.83 1.84 NCCH1 neutral cholesterol ester hydrolase 1 chr1 protein\_coding  
ENSG0000013531.16 2.6359154 5.0092934 5.96E-18 1.32E-15 24.01 45.46 30.2 7.92 CCR15 chemokine differentiation factor 15 chr19 protein\_coding  
ENSG00000188004.8 -1.2110083 0.0065561 0.00313294 0.00917679 0.4 0.48 0.01 0.02 C1orf204 chromosome 1 open reading frame 204 chr19 protein\_coding  
ENSG0000019732.2 2.42241419 1.7514667 0.0014666 0.0048953 0.03 0.03 0.13 0.13 ZNF333 zinc finger protein 333, pseudogene chr19 lncRNA  
ENSG0000025706.15 1.2404915 1.2404915 1.34E-05 8.29E-05 61.66 54.02 32.65 14.22 HML24 HML24 homologous to myeloid leukemia 24 chr14 protein\_coding  
ENSG0000016332.14 1.51221234 1.9797965 6.36E-06 1.78E-05 1 1 1.69 3.69 C11orf74 chromosome 11 open reading frame 74 chr11 protein\_coding  
ENSG0000017896.14 1.0211457 1.9797965 6.36E-06 1.78E-05 1 1 1.69 3.69 C11orf74 chromosome 11 open reading frame 74 chr11 protein\_coding  
ENSG0000019642.9 -1.8138669 1.5555892 5.93E-10 5.33E-09 71.26 64.97 26.16 25.47 PPP1R2B rho guanine nucleotide exchange factor 2 chr9 protein\_coding  
ENSG0000017135.16 -1.4573324 3.9987465 1.14E-06 6.50E-06 3.62 3.39 1.71 1.99 ARHGEF39 ras homologue family GTPase activating factor 39 chr19 protein\_coding  
ENSG00000283318.1 1.9186919 2.0237818 1.78E-06 9.85E-06 0.03 0.167 0.44 AC012360.4 -- chr9 protein\_coding  
ENSG0000027638.1 1.39507616 -0.9734698 0.0027374 0.0184932 0.14 0.55 1.48 0.97 RP11-66B24.1 -- chr13 processed\_transcript  
ENSG00000131033.15 7.3529138 0.4514863 4.22E-11 4.43E-10 0.02 0 0 0.13 C2CG6 component of oligomeric golgi complex 6 chr13 protein\_coding  
ENSG0000045867.1 1.71913949 1.8730199 1.41E-07 6.05E-07 1.02 1.91 5.4 5.4 C12orf129.4 -- chr15 antisense  
ENSG00000141837.17 -2.3500979 -0.3346559 4.27E-07 6.22E-06 0.13 0.09 0.03 0.02 CACNA1A calcium channel, voltage-dependent, P/Q type, alpha 1A subunit chr19 protein\_coding  
ENSG00000278133.1 8.2067973 -0.6279485 1.56E-14 2.37E-13 0.10 0.01 0.41 0.22 RP11-342K2.1 -- chr19 TEL  
ENSG0000023291.5 2.1359496 -0.451084 7.65E-06 3.81E-05 0.05 0.02 0.0 0.31 TMEM254A TMEM254 antisense RNA 1 chr10 antisense  
ENSG00000161638.9 -3.8254841 9.93241603 2.22E-33 1.21E-31 243.84 213.35 22.55 20.99 TIGAS integrin, alpha 5 (fibronectin receptor, alpha polypeptide) chr12 protein\_coding  
ENSG00000131979.17 1.8782497 1.8782497 1.22E-09 1.22E-09 1.67 1.67 1.67 1.67 GCH1 GTP cyclohydrolase 1 chr14 protein\_coding  
ENSG0000028422.14 1.84627128 1.0634174 2.91E-10 2.74E-09 35.48 38.07 17.96 17.96 KRT17 keratin 17, type I chr17 protein\_coding  
ENSG0000028284.18 2.9308205 3.56102242 9.63E-20 2.26E-18 0.51 0.62 5.95 5.58 APO13 apolipoprotein L 3 chr12 protein\_coding  
ENSG0000016737.15 2.25907416 0.0011399 4.46E-06 1.08E-07 0.03 0.03 0.35 ZNF283 zinc finger protein 283 chr19 protein\_coding  
ENSG00000205476.7 -1.1130399 5.9743639 0.0001711 0.00064441 4.34 3.86 2.37 2.69 CDDC85C coiled-coil domain containing 85C chr22 protein\_coding  
ENSG00000202287.11 3.9877477 0.3596075 6.87E-16 1.10E-14 0.02 0.01 0.17 0.55 RB1C1 RBL1-inducible coiled-coil 1 chr18 protein\_coding  
ENSG0000014920.10 1.3777598 2.9541339 7.19E-06 3.29E-06 0.32 0.32 1.68 NCN1A1 nuclear core domain 1A1 chr18 protein\_coding  
ENSG00000466074.7 1.3242774 4.6860795 6.38E-06 3.45E-05 1.05 0.86 3.04 3.34 BAHCC1 BAH domain coiled-coil 1 chr17 protein\_coding  
ENSG0000025059.1 -6.2307332 -0.5505973 2.41E-17 4.69E-16 1.66 0.95 0.0 0 0 C17orf218 -- chr5 lncRNA  
ENSG00000146186.14 1.25117514 4.68171485 4.48E-07 3.27E-06 1.26 1.26 2.36 2.41 MAFPT2 MAP7 domain containing 2 chr19 protein\_coding  
ENSG00000272523.2 3.62493312 -1.1731145 1.97E-07 1.37E-06 0 0 0.08 0.63 RP3-402G11.1 zinc finger protein 633, pseudogene chr22 antisense  
ENSG00000196429.5 -1.8604285 -0.3549491 4.80E-05 0.0004893 0.05 0.02 0.0 0.32 DNAC127 DNA (Hsp40) homolog, subfamily C, member 2 chr19 protein\_coding  
ENSG00000115520.7 1.8251657 1.9375809 7.39E-05 0.0030568 0.6 0.81 1.46 3.11 CCO10B coenzyme Q10 oxidoreductase (S. cerevisiae) chr10 protein\_coding  
ENSG00000188813.5 2.0655908 1.4604776 3.34E-09 2.74E-08 0.1 0.12 0.6 0.59 ZNF507 zinc finger protein 507 chr19 protein\_coding  
ENSG0000016688.11 1.9651484 2.9897568 1.26E-05 1.26E-05 0.44 0.44 0.17 SPRED1 sprouty-related, EVH1 domain containing 1 chr19 protein\_coding  
ENSG0000011679.5 2.42500846 -0.2329772 3.31E-07 2.06E-06 0.1 0.03 0.6 0.42 PTPN6 protein tyrosine phosphatase, non-receptor type 6 chr12 protein\_coding  
ENSG00000068976.5 1.4704203 2.1035564 4.68E-06 2.42E-05 0.5 0.49 1.29 2.24 KIF2A kinesin heavy chain member 2A chr5 protein\_coding  
ENSG0000038907.8 1.85514459 3.7864707 3.78E-07 3.78E-07 10.2 10.2 0.02 0.02 SLCO7A5 solute carrier family 7 (faty acid transporter), member 5 chr19 protein\_coding  
ENSG00000260273.1 2.06033897 -1.9870458 0.0599689 0.02497848 0 0 0.13 0.22 0.05 RP11-4ZD51.1 -- chr6 antisense  
ENSG0000025558.1 6.0670373 -2.528694 4.74E-05 0.0020301 0 0 2.69 0.65 NNUI1-1 RNA, variant U1 small nuclear 19 chr19 snRNA  
ENSG0000014126.15 1.9154581 4.2818136 2.32E-09 2.67E-08 0.54 0.07 0.75 3.34 TTPP2 transcription factor Do-2 (E2F dimerization partner 2) chr19 protein\_coding  
ENSG00000207296.1 6.11590765 -2.1332648 4.74E-05 0.0020301 0 0 2.67 2.52 RNUE-140P RNA U6 small nuclear 140, pseudogene chr19 snRNA  
ENSG0000017180.11 1.0624028 2.6593958 1.24E-06 8.21E-07 0.10 0.26 0.78 1.09 AITFP activating transcription factor 7 interacting protein chr22 protein\_coding  
ENSG00000167678.8 1.9154581 4.2818136 2.32E-09 2.67E-08 0.54 0.07 0.75 3.34 TTPP2 transcription factor Do-2 (E2F dimerization partner 2) chr19 protein\_coding  
ENSG00000131724.9 2.4102423 4.8671575 2.17E-05 9.86E-05 3.34 3.32 3.21 11.62 L13RAB1 leukotrielin L3 receptor, alpha 1 chr16 protein\_coding  
ENSG00000131721.12 -1.8954494 1.54446467 1.45E-06 1.45E-06 1.45 1.45 1.45 1.45 PDGFRB platelet-derived growth factor receptor, beta co-receptor chr16 protein\_coding  
ENSG00000184110.13 -1.4693544 2.7264799 4.17E-07 2.56E-06 50.75 53.05 24.6 25.35 EFBF eukaryotic translation initiation factor 3, subunit C chr16 protein\_coding  
ENSG00000176842.13 -1.4465514 3.14447425 1.86E-06 1.03E-05 3.06 4.3 1.79 1.8 RVS1 rasoxin homeobox 5 chr16 protein\_coding  
ENSG0000017882.13 1.9401617 1.9401617 1.94E-11 1.94E-11 1.94 1.94 1.94 1.94 NALP11 NAL family, cystein domain containing 11 chr16 protein\_coding  
ENSG0000000587.8 -4.2536355 -1.0633472 1.47E-10 1.44E-09 0.09 0.08 0.01 0 0 HSSST1 heparan sulfate (alkosamine) 3-O-sulfatransferase 1 chr4 protein\_coding  
ENSG0000017812.18 3.3142757 1.7202464 7.23E-19 1.60E-17 0.06 0.03 0.3 0.94 CASC5 cancer susceptibility candidate 5 chr15 protein\_coding  
ENSG0000014208.13 1.9154581 4.2818136 2.32E-09 2.67E-08 0.54 0.07 0.75 3.34 TTPP2 transcription factor Do-2 (E2F dimerization partner 2) chr19 protein\_coding  
ENSG00000275454.1 4.56709794 -0.8576724 2.34E-10 2.32E-09 0 0 0.05 0.68 0.9 CTD-202BK1 -- chr15 antisense  
ENSG00000125750.1 1.3150445 1.1359051 0.0015453 0.0005967 0.09 0.13 0.35 0.39 KAA0586 KIAA0586 chr14 protein\_coding  
ENSG00000107560.9 0.1914827 0.1218712 7.35E-07 1.48E-06 0.03 0.03 0.28 KAP1L1P2 KAP1 family interacting protein 2 (class I) chr10 protein\_coding  
ENSG0000029250.13 -1.3433329 9.9535709 3.29E-06 1.74E-05 141.39 144.51 76.78 73.22 KIF1 kinesin family member 1C chr17 protein\_coding  
ENSG0000012526.12 1.4970797 1.4970797 1.33E-06 8.56E-16 0.32 0.32 0.69 KPL1 potassium channel, voltage-gated, KcsA, isoform 1 chr17 protein\_coding  
ENSG00000175970.8 1.0882145 5.4870394 0.0001729 0.0005065 5.63 4.89 1.41 1.55 UNC119B unc-119 homolog B (C. elegans) chr12 protein\_coding  
ENSG0000014889.4 4.8894645 -0.0622891 0.0188973 0.04319557 0 0 0.02 0.05 RAX retina and anterior neural fold homeobox chr18 protein\_coding  
ENSG00000241553.11 1.9252424 7.5225242 0.0001729 0.0005065 5.63 4.89 1.41 1.55 UNC119B unc-119 homolog B (C. elegans) chr12 protein\_coding  
ENSG0000017037.17 -1.3966655 7.7716965 1.56E-06 8.72E-06 356.65 290.31 180.01 148.21 NDUF58 NADH dehydrogenase (ubiquinone) Fe-S protein 8, 23kDa (NADH-coenzyme Q reductase) chr11 protein\_coding  
ENSG0000016717.7 2.9079453 -0.4184917 1.85E-08 1.37E-07 0.03 0 0 0.21 0.16 SSGM1 small G protein signaling modulator 1 chr22 protein\_coding  
ENSG0000017482.15 1.5044763 5.044763 6.04E-06 6.01E-06 4.02 4.02 0.9 0.17 PTPRM protein tyrosine phosphatase, receptor type, M chr19 protein\_coding  
ENSG00000204630.11 -7.427058 0.5888517 4.71E-29 2.08E-27 1.29 0.86 0 0 0.01 TRM15 trypsin motif containing 15 chr10 protein\_coding  
ENSG0000016560.10 2.24265475 1.8989654 4.15E-11 3.43E-10 0.09 0.12 0.44 0.19 PZD08 PZD domain containing 8 chr10 protein\_coding  
ENSG00000103169.10 1.5856819 1.5856819 4.48E-07 3.98E-09 4.60 4.60 0.62 0.62 MAMC3 macrophage receptor with collagenous structure chr10 protein\_coding  
ENSG0000017447.11 5.7924489 -2.359189 0.0026535 0.0091747 0 0 0.01 0.06 KRT4 keratin 4, type I chr12 protein\_coding  
ENSG0000025896.16 3.2859351 -0.6073972 2.35E-09 1.96E-08 0.24 0 0 0.25 0.08 LKLN1 nucleolin 1, Hsp40 domain containing 1, Hsp40 chr12 protein\_coding  
ENSG00000128915.10 1.5992474 1.3169216 3.87E-06 2.03E-05 0.12 0.08 0.02 0.53 EIC2 interact of fibrin elongation complex ELL subunit 2 chr15 protein\_coding  
ENSG00000178807.15 1.3556219 1.3556219 1.95E-11 5.47E-10 0.02 0.02 0.65 TNRCC2 nucleotide repeat containing 6C chr12 protein\_coding  
ENSG0000013482.13 2.40093846 1.0237441 1.44E-10 1.41E-09 0.04 0.05 0.3 0.32 CLOCK clock circadian regulator chr14 protein\_coding  
ENSG0000028861.1 3.00985124 -2.6662321 0.00943894 0.02469931 0 0 0.06 0.39 0.33 AC039587.5 -- chr11 antisense  
ENSG0000012880.13 1.8571575 3.1939756 1.64E-09 1.44E-08 2.19 2.19 0.5 0.95 ARHGA522 Rho GTPase activating protein 22 chr10 protein\_coding  
ENSG0000045555.13 -2.4907944 6.7988959 1.20E-16 2.20E-15 10.41 12.96 2.85 2.68 MYO10 myosin X chr10 protein\_coding  
ENSG00000114423.17 -1.99527 2.7243363 2.61E-10 2.47E-09 1.04 1.17 0.4 0.34 CBLB C/EBP beta protein 1 chr19 protein\_coding  
ENSG0000024578.4 1.5856819 1.5856819 4.48E-07 3.98E-09 4.60 4.60 0.62 0.62 UNC100B0 long interspersed non-protein coding RNA 100B chr19 protein\_coding  
ENSG00000135011.14 -1.8123893 1.5381321 8.91E-10 7.85E-09 21.2 19.4 7.92 7.48 SSBPA1 small strand DNA binding protein 1 chr19 protein\_coding  
ENSG00000103446.10 -1.111347 1.1664399 0.0001086 0.0004368 44.0 49.3 302.38 275.43 MFRN1 myofibrin heavy chain 9, non-muscle chr24 protein\_coding  
ENSG0000018612.11 -0.3171078 1.448749 1.48E-07 1.10E-07 0.23 0 0 0.09 ZNF507 zinc finger protein 507 chr19 protein\_coding  
ENSG00000103849.10 7.8739461 -0.908017 0.0001729 0.0005065 5.63 4.89 1.41 1.55 UNC119B unc-119 homolog B (C. elegans) chr12 protein\_coding  
ENSG00000138974.14 1.0300499 1.0300499 0.0001729 0.0005065 5.63 4.89 1.41 1.55 UNC119B unc-119 homolog B (C. elegans) chr12 protein\_coding  
ENSG00000131788.14 -1.4026348 4.8013074 1.73E-06 9.61E-06 11.59 10.97 5.95 5.41 PIAS3 protein inhibitor of activated STAT, 3 chr19 protein\_coding  
ENSG00000074817.7 -9.5965499 8.8247154 2.91E-114 9.97E-111 81.71 87.59 0.21 0.08 NOTCH3 notch 3 chr19 protein\_coding  
ENSG00000166734.17 2.7100534 1.335E-11 3.35E-11 3.76E-10 0.37 0.42 0.37 0.37 CASC4 cancer susceptibility candidate 4 chr15 protein\_coding  
ENSG00000170948.14 4.8998041 -0.0567113 0.0188973 0.04319557 0 0 0.03 0.03 0.03 PSF6 pregnancy specific beta 1-glycoprotein 6 chr19 protein\_coding  
ENSG00000172945.12 3.3153377 1.7598606 4.83E-19 1.09E-17 0.1 0.04 0.69 1.23 SP3 SC3 transcription factor 3 chr2 protein\_coding  
ENSG0000013128.15 1.0045665 7.020531 0.004332 0.0160388 0.0 0.0 0.26 30.94 CAP1 47L, adenylate cyclase-associated protein 1 (yeast) chr19 protein\_coding  
ENSG0000027728.1 4.77073895 -3.141721 0.0188973 0.04319557 0 0 0.41 0.06 RP11-143KL.1 -- chr17 antisense  
ENSG0000014491.1 2.6826991 1.0000000 0.0002016 0.00077306 0.12 0.12 0.04 0.16 RP3-508L1.1 zinc finger with KRAB and SCAN domains 1 chr22 antisense  
ENSG00000106261.5 1.0832072 3.7103896 0.0000953 0.0006953 1.87 1.87 0.24 2.12 ZSCAN1 zinc finger with KRAB and SCAN domains 1 chr19 protein\_coding  
ENSG00000188626.6 5.04175262 -2.9627674 0.0100455 0.02582742 0 0 0.13 0.13 COLGABM collagen alpha 8 family member M chr15 protein\_coding  
ENSG00000278800.1 1.125111 1.25111 1.25E-11 1.25E-10 1428.2 1203.3 452.1 430.08 RPS10-RUD1 RPS10-RUD1 readthrough chr19 protein\_coding  
ENSG00000258742.2 -1.6372259 3.85216712 4.88E-08 3.41E-07 2.75 2.79 1.07 1.35 UNC100346 long interspersed non-protein coding RNA 346 chr13 lncRNA  
ENSG00000261634.3 -3.9017869 -1.8090166 1.01E-06 5.80E-06 0.11 0.05 0.05 0.01 RP11-35ZD1.1 -- chr15 antisense  
ENSG00000195895.5 -2.9695766 3.25542125 1.26E-07 1.46E-06 2.46 2.46 1.12 0.74 MAMPT2 MAP7 domain containing 2 chr19 protein\_coding  
ENSG00000196449.3 -1.5206694 4.6465006 2.59E-07 1.63E-06 17.24 15.66 7.33 7.96 YDC YDC (Hsp40)-thrombospondin/thrombospondin domain containing chr15 protein\_coding  
ENSG00000188527.7 6.72803771 -1.8641315 2.24E-07 1.42E-06 0 0 0.02 0.18 Cbrf171 chromosome 9 open reading frame 171 chr19 protein\_coding  
ENSG00000107350.12 2.6589191 2.6589191 1.91E-06 1.91E-16 1.84 1.84 1.54 14.08 UCU11-1 human chromosome 11 (UCR1) chr17 protein\_coding  
ENSG00000270698.1 2.43944279 -2.4390313 0.0191326 0.0011315 0.03 0 0 0.04 0.02 MIR222 host gene chr19 lncRNA  
ENSG00000163528.11 -1.0154267 5.31486634 0.0004324 0.00139437 25.29 27.8 17.82 17.82 CHCHD4 chondrichthyan/human C/EBP delta chr4 protein\_coding  
ENSG00000113948.15 1.5856819 1.5856819 4.48E-07 3.98E-09 4.60 4.60 0.62 0.62 MAMC3 macrophage receptor with collagenous structure chr10 protein\_coding  
ENSG00000138771.13 -1.9858683 4.5372008 3.76E-11 3.94E-10 2.55 2.29 0.94 0.94 SHROOM3 shroom family class 3 domain containing 3 chr19 protein\_coding  
ENSG00000198618.5 -1.41958 2.4121191 6.41E-07

|                     |            |            |           |             |       |       |       |                  |                                                                                  |                                            |                        |                |
|---------------------|------------|------------|-----------|-------------|-------|-------|-------|------------------|----------------------------------------------------------------------------------|--------------------------------------------|------------------------|----------------|
| ENSG0000013054.4    | 9.7269328  | 0.7779797  | 491E-29   | 2.16E-27    | 0.0   | 0.0   | 0.8   | 0.92 FAM155B     | family with sequence similarity 155, member B                                    | chrX                                       | protein_coding         |                |
| ENSG0000011657.0    | 1.8894139  | 1.7775063  | 208E-08   | 1.02E-07    | 0.19  | 0.17  | 0.64  | 115 KIN          | Kin17 DNA and RNA binding protein                                                | chr10                                      | protein_coding         |                |
| ENSG0000017328.20   | 1.5984979  | 0.6805767  | 1.89E-05  | 8.70E-05    | 0.04  | 0.07  | 0.18  | 0.24 RBAP31      | RBAP3A interacting protein                                                       | chr12                                      | protein_coding         |                |
| ENSG000000900.1     | 1.0631486  | 0.0000000  | 3.37E-13  | 4.4E-12     | 0.0   | 0.0   | 0.32  | AC020636.16      |                                                                                  | chr12                                      | protein_coding         |                |
| ENSG00000186862.16  | 1.3967169  | 1.6863958  | 1.95E-05  | 9.95E-05    | 0.92  | 0.63  | 0.37  | 0.42 PDZP7       | PDZ domain containing 7                                                          | chr10                                      | protein_coding         |                |
| ENSG00000101871.13  | 1.171865   | 1.2897183  | 1.66E-06  | 0.0014711   | 0.12  | 0.38  | 0.1   | 0.26 MJD1        | midline 1                                                                        | chr1                                       | protein_coding         |                |
| ENSG00000104231.1   | 1.0747869  | 0.9729252  | 0.04E-06  | 3.12E-09    | 0.0   | 0.0   | 0.32  | 0.04 KR78        | keratin 78, type II                                                              | chr1                                       | protein_coding         |                |
| ENSG00000106197.17  | 1.2462405  | 1.5883402  | 0.0015374 | 0.0009198   | 0.69  | 0.8   | 0.39  | 0.45 ABCG1       | ATP-binding cassette, sub-family G (WHITE), member 1                             | chr21                                      | protein_coding         |                |
| ENSG00000104676.1   | 1.2481679  | 1.2481676  | 1.21E-11  | 1.2E-10     | 0.11  | 0.11  | 0.11  | 0.75 ZBTB38      | zinc finger and BTB domain containing 38                                         | chr1                                       | protein_coding         |                |
| ENSG00000115392.10  | 1.3714776  | 2.4998913  | 1.87E-05  | 8.42E-05    | 0.44  | 1.58  | 0.34  | 0.64 FANCL       | Fanconi anemia, complementation group L                                          | chr16                                      | protein_coding         |                |
| ENSG00000278399.1   | 4.2334405  | 0.4999444  | 7.48E-07  | 4.11E-18    | 4.87  | 4.72  | 0.36  | 0.31 R131-63G61  |                                                                                  | chr16                                      | lncRNA                 |                |
| ENSG0000010441.9    | 1.141455   | 4.5913673  | 0.0000000 | 0.00003794  | 4.26  | 0.0   | 0.0   | 0.17 LYRM8       | LYRM motif containing 8                                                          | chr10                                      | protein_coding         |                |
| ENSG00000189132.7   | 1.6514567  | 5.5541472  | 1.85E-08  | 1.37E-07    | 0.11  | 10.61 | 0.18  | 0.21 ZNF395      | zinc finger protein 395                                                          | chr16                                      | protein_coding         |                |
| ENSG00000186673.3   | 6.2875928  | 0.6825876  | 2.45E-06  | 2.85E-24    | 0.05  | 0.0   | 0.46  | 0.72 FAM48B      | family with sequence similarity 48, member B                                     | chr16                                      | protein_coding         |                |
| ENSG00000104904.4   | 1.0290909  | 0.987628   | 6.21E-06  | 2.77E-05    | 0.1   | 0.0   | 0.0   | 0.463 SPANX1     | SPANX domain containing 1                                                        | chr10                                      | processed_transcript   |                |
| ENSG00000156042.16  | 5.0518686  | 1.9744167  | 0.0010455 | 0.02582742  | 0.0   | 0.0   | 0.02  | 0.05 CFAFP70     | cella and fibroblast associated protein 70                                       | chr10                                      | protein_coding         |                |
| ENSG00000263235.1   | 1.6178198  | 1.6785246  | 3.94E-07  | 2.43E-06    | 0.13  | 4.22  | 1.38  | 1.68 RP11-461A8  |                                                                                  | chr16                                      | protein_coding         |                |
| ENSG00000162400.1   | 1.6242400  | 1.0011028  | 0.0000000 | 0.00002256  | 0.0   | 0.0   | 0.71  | 1.15 ATP5V1B1    | ATPase, H+ transporting, lysosomal 42kDa, V1 subunit C1                          | chr16                                      | protein_coding         |                |
| ENSG00000201013.1   | 1.4867115  | 1.4508871  | 0.0203274 | 0.0303863   | 0.72  | 2.72  | 6.58  | 0.34 MT-TN       | mitochondrially encoded RNA aspartate                                            | chrM                                       | lncRNA                 |                |
| ENSG00000259037.7   | 5.0234041  | 3.1294261  | 6.0100405 | 0.02582742  | 0.01  | 0.02  | 0.0   | 0.0              | GMD5 antisense RNA 1 (head to head)                                              | chr6                                       | antisense              |                |
| ENSG0000014031.0    | 1.0747869  | 0.9729252  | 0.04E-06  | 3.12E-09    | 0.0   | 0.0   | 0.32  | 0.04 KR78        | Kelvin repeat domain 53                                                          | chr1                                       | protein_coding         |                |
| ENSG00000202195.7   | 7.6782842  | 1.8459016  | 6.45E-05  | 6.61E-43    | 2.74  | 4.51  | 0.0   | 0.03 KR252A      | killer cell immunoglobulin-like receptor, two domains, short cytoplasmic tail, 4 | chr19                                      | polymorphic_pseudogene |                |
| ENSG00000106078.16  | 1.8184279  | 2.4582599  | 8.28E-10  | 7.29E-09    | 0.57  | 2.68  | 0.81  | 0.12 CSDP2       | cardion-1 like 2, domain 2                                                       | chr1                                       | protein_coding         |                |
| ENSG00000186044.11  | 1.0246568  | 4.6124126  | 0.0043672 | 0.0015448   | 9.35  | 11.39 | 6.62  | 0.66 MUKL        | mouse lineage kinase domain-like                                                 | chr16                                      | protein_coding         |                |
| ENSG00000173105.1   | 1.3873105  | 0.9807058  | 1.06E-07  | 1.30E-06    | 0.0   | 0.0   | 0.0   | 0.13 MCB2B       | muscle specific with OB domains                                                  | chr17                                      | protein_coding         |                |
| ENSG00000202204.2   | 6.2175345  | 0.3011266  | 1.06E-47  | 1.30E-45    | 0.29  | 0.27  | 32.94 | 2347 RP11-180E2  |                                                                                  | chr17                                      | lncRNA                 |                |
| ENSG00000183637.10  | 5.9955977  | 2.567598   | 0.0000000 | 0.000057423 | 0.04  | 0.01  | 0.0   | 0.0              | PRICKLE2 (2 Drosophila)                                                          | chr2                                       | protein_coding         |                |
| ENSG00000103842.18  | 1.3631299  | 1.11034218 | 1.11E-05  | 5.35E-05    | 0.75  | 2.4   | 0.0   | 0.28 FBQ324      | F-box protein 324                                                                | chr1                                       | protein_coding         |                |
| ENSG00000189139.1   | 1.098895   | 2.3025191  | 0.0045419 | 0.0159247   | 0.36  | 1.86  | 3.15  | 3.84 ARHAP31B    | Rho GTPase activating protein 11B                                                | chr15                                      | protein_coding         |                |
| ENSG00000264187.1   | 1.5823303  | 0.3264237  | 0.0000000 | 0.0000000   | 3.46  | 2.85  | 10.71 | 6.75 RP11-450M2  |                                                                                  | chr1                                       | protein_coding         |                |
| ENSG00000204339.1   | 5.0468046  | 0.2599242  | 0.0104545 | 0.02582742  | 0.0   | 0.0   | 0.0   | 0.07 ZFN6C2      |                                                                                  | chr1                                       | TEC                    |                |
| ENSG0000017706.11   | 2.2161265  | 6.7177177  | 9.88E-14  | 1.38E-12    | 319   | 3.65  | 20.01 | 22.38 HEG1       | heart development protein with EGF-like domain 1                                 | chr3                                       | protein_coding         |                |
| ENSG0000010441.9    | 1.141455   | 4.5913673  | 0.0000000 | 0.00003794  | 4.26  | 0.0   | 0.0   | 0.17 LYRM8       | LYRM motif containing 8                                                          | chr10                                      | protein_coding         |                |
| ENSG00000136102.2   | 2.191117   | 0.3926239  | 2.68E-12  | 3.20E-11    | 4.55  | 4.1   | 1.34  | 1.19 REXPM1      | retaxin/insulin-like family peptide receptor 1                                   | chr16                                      | protein_coding         |                |
| ENSG0000011509.14   | 5.025255   | 1.288772   | 0.0104545 | 0.02582742  | 0.0   | 0.0   | 0.05  | 0.0              | KRFP1                                                                            | kringle containing transmembrane protein 2 | chr16                  | protein_coding |
| ENSG000001264.8     | 1.55E-05   | 2.21E739.8 | 1.55E-05  | 2.21E739.8  | 0.0   | 0.0   | 0.0   | 0.58 HCS         | hematopoietic cell signal transducer                                             | chr19                                      | protein_coding         |                |
| ENSG00000100167.18  | 2.2204759  | 3.981672   | 1.13E-13  | 6.62E-12    | 0.75  | 1.12  | 6.01  | 5.55             | 3-sep 3                                                                          | chr22                                      | protein_coding         |                |
| ENSG0000013962.11   | 3.2545018  | 1.4960127  | 5.62E-12  | 3.33E-16    | 0.06  | 0.07  | 0.67  | 0.88 ARHAP39     | Rho GTPase activating protein 29                                                 | chr1                                       | protein_coding         |                |
| ENSG00000103842.18  | 1.3631299  | 1.11034218 | 1.11E-05  | 5.35E-05    | 0.75  | 2.4   | 0.0   | 0.28 FBQ324      | F-box protein 324                                                                | chr1                                       | protein_coding         |                |
| ENSG00000156113.9   | 5.058111   | 0.9326584  | 2.98E-26  | 9.11E-24    | 0.37  | 0.34  | 0.0   | 0.01 KNNM1A      | calcium-binding protein, calmodulin-binding protein                              | chr10                                      | protein_coding         |                |
| ENSG00000119919.10  | 5.946161   | 1.892277   | 0.0022002 | 0.0085312   | 0.3   | 0.14  | 0.0   | 0.03 NK2         | NK2 homeobox 2                                                                   | chr10                                      | protein_coding         |                |
| ENSG00000134761.7.5 | 1.0747869  | 0.9729252  | 0.04E-06  | 3.12E-09    | 0.0   | 0.0   | 0.32  | 0.04 KR78        | Kelvin repeat domain 53                                                          | chr1                                       | protein_coding         |                |
| ENSG00000203145.6   | 1.0145237  | 3.6069807  | 0.0001367 | 0.0021152   | 2.34  | 2.67  | 1.58  | 0.17 RP11-418B11 |                                                                                  | chr17                                      | protein_coding         |                |
| ENSG00000104676.1   | 2.2866423  | 6.9561709  | 1.85E-15  | 1.8E-14     | 3.04  | 10.29 | 14.57 | 80.29 SCDT1      | serine cluster domain transmembrane 1                                            | chr17                                      | antisense              |                |
| ENSG00000179558.7   | 8.632683   | 8.2654435  | 9.91E-84  | 1.23E-76    | 12.13 | 15.86 | 0.04  | 0.06 CHD2        | chromatin 2, type 1, N-cadherin (neuronal)                                       | chr18                                      | protein_coding         |                |
| ENSG00000141497.12  | 4.0443615  | 0.1761158  | 1.78E-14  | 2.70E-13    | 0.04  | 0.0   | 0.84  | 0.05 ZMNDI5      | zinc finger, MYND-type containing 15                                             | chr17                                      | protein_coding         |                |
| ENSG0000010441.9    | 1.141455   | 4.5913673  | 0.0000000 | 0.00003794  | 4.26  | 0.0   | 0.0   | 0.17 LYRM8       | LYRM motif containing 8                                                          | chr10                                      | protein_coding         |                |
| ENSG0000018788.12   | 2.8795643  | 1.270612   | 2.10E-13  | 2.82E-12    | 0.06  | 0.09  | 0.61  | 0.84 SNK         | SNF related kinase                                                               | chr3                                       | protein_coding         |                |
| ENSG00000213064.8   | 1.83802314 | 3.11473028 | 5.55E-06  | 2.81E-05    | 0.33  | 0.37  | 1.04  | 1.38 SPIT2       | SPF2 domain containing 2                                                         | chr1                                       | protein_coding         |                |
| ENSG00000189139.1   | 1.098895   | 2.3025191  | 0.0045419 | 0.0159247   | 0.36  | 1.86  | 3.15  | 3.84 ARHAP31B    | Rho GTPase activating protein 11B                                                | chr15                                      | protein_coding         |                |
| ENSG0000017594.11   | 2.0667219  | 0.7098022  | 0.0068    | 4.78E-07    | 0.19  | 0.3   | 1.1   | 1.64 SPTD23A     | sphingomyelin phosphodiesterase, acid-like 1                                     | chr16                                      | protein_coding         |                |
| ENSG00000102810.1   | 7.182348   | 1.683075   | 4.08E-09  | 3.59E-08    | 0.69  | 1.23  | 0.0   | 0.01 RP11-349C2  |                                                                                  | chrX                                       | lncRNA                 |                |
| ENSG0000013962.11   | 3.2545018  | 1.4960127  | 5.62E-12  | 3.33E-16    | 0.06  | 0.07  | 0.67  | 0.88 ARHAP39     | Rho GTPase activating protein 29                                                 | chr1                                       | protein_coding         |                |
| ENSG00000189139.1   | 1.098895   | 2.3025191  | 0.0045419 | 0.0159247   | 0.36  | 1.86  | 3.15  | 3.84 ARHAP31B    | Rho GTPase activating protein 11B                                                | chr15                                      | protein_coding         |                |
| ENSG0000018771.16   | 3.825343   | 1.6465205  | 2.05E-06  | 7.77E-15    | 0.15  | 1.42  | 0.15  | 0.12 GRD1        | glutamate receptor, ionotropic, delta 1                                          | chr10                                      | protein_coding         |                |
| ENSG00000104676.1   | 2.2866423  | 6.9561709  | 1.85E-15  | 1.8E-14     | 3.04  | 10.29 | 14.57 | 80.29 SCDT1      | serine cluster domain transmembrane 1                                            | chr17                                      | antisense              |                |
| ENSG0000015741.13   | 1.9300265  | 1.2594191  | 8.34E-05  | 0.021661    | 0.06  | 0.05  | 0.29  | 0.25 UBRN2       | ubiquitin 2                                                                      | chr7                                       | protein_coding         |                |
| ENSG00000108831.14  | 1.23704718 | 0.189496   | 0.0024613 | 0.0120501   | 0.05  | 0.03  | 0.15  | 0.12 TCR3A       | tetratricopeptide repeat domain 39A                                              | chr1                                       | protein_coding         |                |
| ENSG00000102718.1   | 1.1930265  | 1.2594191  | 8.34E-05  | 0.021661    | 0.06  | 0.05  | 0.29  | 0.25 UBRN2       | ubiquitin 2                                                                      | chr7                                       | protein_coding         |                |
| ENSG0000017188.14   | 1.8993061  | 1.8529962  | 1.33E-08  | 9.96E-08    | 0.09  | 0.29  | 0.72  | 1.12 YTHDC2      | YTH domain containing 2                                                          | chr5                                       | protein_coding         |                |
| ENSG00000201386.1   | 1.3110775  | 3.1147521  | 0.0018017 | 0.00065458  | 2.77  | 3.01  | 8.25  | 8.62 LCAT        | lecithin:cholesterol acyltransferase                                             | chr16                                      | protein_coding         |                |
| ENSG00000103842.18  | 1.3631299  | 1.11034218 | 1.11E-05  | 5.35E-05    | 0.75  | 2.4   | 0.0   | 0.28 FBQ324      | F-box protein 324                                                                | chr1                                       | protein_coding         |                |
| ENSG00000103842.18  | 1.3631299  | 1.11034218 | 1.11E-05  | 5.35E-05    | 0.75  | 2.4   | 0.0   | 0.28 FBQ324      | F-box protein 324                                                                | chr1                                       | protein_coding         |                |
| ENSG00000103842.18  | 1.3631299  | 1.11034218 | 1.11E-05  | 5.35E-05    | 0.75  | 2.4   | 0.0   | 0.28 FBQ324      | F-box protein 324                                                                | chr1                                       | protein_coding         |                |
| ENSG00000103842.18  | 1.3631299  | 1.11034218 | 1.11E-05  | 5.35E-05    | 0.75  | 2.4   | 0.0   | 0.28 FBQ324      | F-box protein 324                                                                | chr1                                       | protein_coding         |                |
| ENSG00000103842.18  | 1.3631299  | 1.11034218 | 1.11E-05  | 5.35E-05    | 0.75  | 2.4   | 0.0   | 0.28 FBQ324      | F-box protein 324                                                                | chr1                                       | protein_coding         |                |
| ENSG00000103842.18  | 1.3631299  | 1.11034218 | 1.11E-05  | 5.35E-05    | 0.75  | 2.4   | 0.0   | 0.28 FBQ324      | F-box protein 324                                                                | chr1                                       | protein_coding         |                |
| ENSG00000103842.18  | 1.3631299  | 1.11034218 | 1.11E-05  | 5.35E-05    | 0.75  | 2.4   | 0.0   | 0.28 FBQ324      | F-box protein 324                                                                | chr1                                       | protein_coding         |                |
| ENSG00000103842.18  | 1.3631299  | 1.11034218 | 1.11E-05  | 5.35E-05    | 0.75  | 2.4   | 0.0   | 0.28 FBQ324      | F-box protein 324                                                                | chr1                                       | protein_coding         |                |
| ENSG00000103842.18  | 1.3631299  | 1.11034218 | 1.11E-05  | 5.35E-05    | 0.75  | 2.4   | 0.0   | 0.28 FBQ324      | F-box protein 324                                                                | chr1                                       | protein_coding         |                |
| ENSG00000103842.18  | 1.3631299  | 1.11034218 | 1.11E-05  | 5.35E-05    | 0.75  | 2.4   | 0.0   | 0.28 FBQ324      | F-box protein 324                                                                | chr1                                       | protein_coding         |                |
| ENSG00000103842.18  | 1.3631299  | 1.11034218 | 1.11E-05  | 5.35E-05    | 0.75  | 2.4   | 0.0   | 0.28 FBQ324      | F-box protein 324                                                                | chr1                                       | protein_coding         |                |
| ENSG00000103842.18  | 1.3631299  | 1.11034218 | 1.11E-05  | 5.35E-05    | 0.75  | 2.4   | 0.0   | 0.28 FBQ324      | F-box protein 324                                                                | chr1                                       | protein_coding         |                |
| ENSG00000103842.18  | 1.3631299  | 1.11034218 | 1.11E-05  | 5.35E-05    | 0.75  | 2.4   | 0.0   | 0.28 FBQ324      | F-box protein 324                                                                | chr1                                       | protein_coding         |                |
| ENSG00000103842.18  | 1.3631299  | 1.11034218 | 1.11E-05  | 5.35E-05    | 0.75  | 2.4   | 0.0   | 0.28 FBQ324      | F-box protein 324                                                                | chr1                                       | protein_coding         |                |
| ENSG00000103842.18  | 1.3631299  | 1.11034218 | 1.11E-05  | 5.35E-05    | 0.75  | 2.4   | 0.0   | 0.28 FBQ324      | F-box protein 324                                                                | chr1                                       | protein_coding         |                |
| ENSG00000103842.18  | 1.3631299  | 1.11034218 | 1.11E-05  | 5.35E-05    | 0.75  | 2.4   | 0.0   | 0.28 FBQ324      | F-box protein 324                                                                | chr1                                       | protein_coding         |                |
| ENSG00000103842.18  | 1.3631299  | 1.11034218 | 1.11E-05  | 5.35E-05    | 0.75  | 2.4   | 0.0   | 0.28 FBQ324      | F-box protein 324                                                                | chr1                                       | protein_coding         |                |
| ENSG00000103842.18  | 1.3631299  | 1.11034218 | 1.11E-05  | 5.35E-05    | 0.75  | 2.4   | 0.0   | 0.28 FBQ324      | F-box protein 324                                                                | chr1                                       | protein_coding         |                |
| ENSG00000103842.18  | 1.3631299  | 1.11034218 | 1.11E-05  | 5.35E-05    | 0.75  | 2.4   | 0.0   | 0.28 FBQ324      | F-box protein 324                                                                | chr1                                       | protein_coding         |                |
| ENSG00000103842.18  | 1.3631299  | 1.11034218 | 1.11E-05  | 5.35E-05    | 0.75  | 2.4   | 0.0   | 0.28 FBQ324      | F-box protein 324                                                                | chr1                                       | protein_coding         |                |
| ENSG00000103842.18  | 1.3631299  | 1.11034218 | 1.11E-05  | 5.35E-05    | 0.75  | 2.4   | 0.0   | 0.28 FBQ324      | F-box protein 324                                                                | chr1                                       | protein_coding         |                |
| ENSG00000103842.18  | 1.3631299  | 1.11034218 | 1.11E-05  | 5.35E-05    | 0.75  | 2.4   | 0.0   | 0.28 FBQ324      | F-box protein 324                                                                | chr1                                       | protein_coding         |                |
| ENSG00000103842.18  | 1.3631299  | 1.11034218 | 1.11E-05  | 5.35E-05    | 0.75  | 2.4   | 0.0   | 0.28 FBQ324      | F-box protein 324                                                                | chr1                                       | protein_coding         |                |
| ENSG00000103842.18  | 1.3631299  | 1.11034218 | 1.11E-05  | 5.35E-05    | 0.75  | 2.4   | 0.0   | 0.28 FB          |                                                                                  |                                            |                        |                |

ENSG00000172145 22270901 1.63937464 1.59E-10 1.51E-09 0.09 0.2 0.98 0.81 KIAA1919 KIAA1919 chr6 protein\_coding  
ENSG00000254317.2 1.19542539 1.0542539 4.44E-05 0.00019413 0.82 1.52 0.57 0.69 C21orf241B C21orf241B chr6 lncRNA  
ENSG00000272462.2 1.239789 2.07451836 4.44E-05 0.00019413 0.82 1.52 0.57 0.69 U91328.19 -- chr6 lncRNA  
ENSG00000132405.17 1.3038438 4.99639579 7.92E-06 3.30E-05 6.78 6.94 3.28 4.14 TBC1D10A TBC1 domain family, member 14 chr6 protein\_coding  
ENSG00000270074.1 1.90058394 0.5750117 1.03E-25 2.00E-06 9.34 10.57 24.3 0.86 RP11-351J21 chr6 lncRNA  
ENSG000001005818 1.054055 1.00518575 4.62E-34 2.58E-32 2.38 1.46 0 0 0 RARRES2 retinoic acid receptor responder (tazarotene induced) 2 chr7 protein\_coding  
ENSG0000019455.6 1.46235988 3.1536604 1.60E-06 8.91E-08 0.65 0.86 241 3.17 PKC8A phosphoinositide-3-kinase, regulatory subunit 4 chr7 protein\_coding  
ENSG00000140941.11 5.8053551 0.033008 0.00116021 0.00013021 9.34 10.57 24.3 30.42 MAP1LC10B microtubule-associated protein 1, kate chain 3 beta chr7 protein\_coding  
ENSG0000028081.2 6.6099344 1.9521913 1.05E-06 6.02E-06 0 0 0.23 0.33 MCK39584 -- chr21 lncRNA  
ENSG00000078043.14 1.60963869 1.17072411 1.23E-06 3.96E-06 0 0 0.39 PIAS2 protein inhibitor of activated STAT, 2 chr18 protein\_coding  
ENSG0000013635.16 1.0911297 0.0015552 0.0005992 0.0005992 15.5 16.8 485 0.38 KAS isolety-alpha antisense RNA chr18 protein\_coding  
ENSG0000027468.1 3.288411 1.8715498 0.0025363 0.0004222 0.09 0 0.051 0.87 RP11-86C11 -- chr6 lncRNA  
ENSG0000027270.4 1.3986211 1.1162444 6.85E-07 1.11E-06 0.71 0.75 0 0 0 PAR6G-AS1 PAR6G antisense RNA chr18 protein\_coding  
ENSG0000012953.11 1.605893 0.0242666 0.0001402 0.00054692 0.04 0.2 0.54 0.45 NLR neural retina leucine apur chr14 protein\_coding  
ENSG00000164211.11 1.53981927 0.031055 1.63E-19 3.78E-18 0.33 0.22 0.01 0 0 STARD4 SAR-related lipid transfer (START) domain containing 4 chr5 protein\_coding  
ENSG0000036438.15 1.172754 5.65054255 4.22E-06 2.00E-08 9.47 9.78 3.37 43.9 AHRH1 aryl-hydrocarbon receptor repressor chr5 protein\_coding  
ENSG0000020282.13 1.6533077 3.89494026 3.60E-08 2.55E-07 8.12 6.74 2.99 3.32 DGAT2 diacylglycerol O-acyltransferase 2 chr11 protein\_coding  
ENSG0000023883.3 2.65839646 0.4862111 1.31E-10 1.30E-09 0.26 0.25 2.11 2.22 RP11-98B18 -- chr11 antisense  
ENSG0000016291.14 1.844034 5.08439398 6.04E-11 6.21E-10 8.7 6.22 2.57 2.61 MEGF6 multiple EGF-like-domains 6 chr11 protein\_coding  
ENSG0000013063.10 1.61117791 2.85165594 1.19E-07 1.28E-06 0.36 0.51 1.8 1.73 RSPH3 radial spoke 3 homolog (Chlamydomonas) chr16 protein\_coding  
ENSG0000017448.12 1.1108223 1.72291079 0.00011456 0.00045301 79.59 59.76 43.78 42.25 AKR1A1 aldo-keto reductase family 1, member A1 (aldehyde reductase) chr16 protein\_coding  
ENSG0000013647.10 1.1862288 1.9462122 1.22E-06 6.39E-06 0.3 0.44 1 1.97 SHH1 salt ES1 ubiquitin protein ligase 1 chr16 protein\_coding  
ENSG0000028986.4 1.82766684 2.3721831 1.14E-08 6.88E-08 1.43 1.69 6.98 7.82 RAB11B-AS1 RAB11B antisense RNA 1 chr16 antisense  
ENSG0000022696.6 1.1257628 1.92177836 0.00043739 0.00154672 3.43 3.25 2.44 1.64 LENG8-AS1 LENG8 antisense RNA 1 chr19 antisense  
ENSG00000142910.14 5.2562671 6.6971428 1.03E-25 3.72E-24 64.33 66.33 96.1 0.58 TM6GL1 tubulin-interacting nephritis antigen-like 1 chr19 protein\_coding  
ENSG00000073417.13 1.11372499 2.03230651 0.00038162 0.00136561 0.48 0.5 0.09 1.98 POEBA phosphodiesterase 8A chr15 protein\_coding  
ENSG0000011727.10 1.3651137 0.5396442 0.00377991 0.00108987 0.04 0.06 0.16 0.18 HCTC2 host cell factor 2 chr12 protein\_coding  
ENSG00000081479.11 4.89846445 1.08896473 0.0089645 0.04519557 0 0 0 0.01 LRP2 low density lipoprotein receptor-related protein 2 chr2 protein\_coding  
ENSG00000197594.10 1.1890315 0.26740354 6.41E-07 3.80E-06 0.22 0.21 0.09 0.05 ENRP1 ectonucleotide pyrophosphatase/phosphodiesterase 1 chr6 protein\_coding  
ENSG00000134871.16 1.0881885 1.01674588 0.103E-13 2.71E-133 27.28 27.1 0.18 0.18 C20orf42 collagen, type IV, alpha 2 chr13 protein\_coding  
ENSG00000131477.9 2.62329808 7.31E-13 9.31E-12 0.72 0.38 4.29 4.88 RAMP2 receptor (G protein-coupled) activity modulating protein 2 chr17 protein\_coding  
ENSG0000020528.13 2.8061498 2.3130310 2.16E-16 3.88E-15 0.18 0.36 2.14 2.92 MASTL microtubule associated serine/threonine kinase-like chr10 protein\_coding  
ENSG0000015712.17 1.4854031 3.9101338 6.97E-07 1.11E-06 1.52 1.76 5.71 6.17 FANP1 PAX interacting (with transcription-activation domain) protein 1 chr10 protein\_coding  
ENSG00000026475.1 7.52026235 1.2167394 3.22E-11 3.41E-10 0 0 0.078 0.10 TTC39C-AS1 TTC39C antisense RNA 1 chr18 antisense  
ENSG00000107957.15 1.34513267 1.9697474 1.45E-02 3.24E-26 0.76 0.84 2.93 0.10 SHP2C2 SHP and P4 domains 2 chr10 protein\_coding  
ENSG0000013147.5 1.5000000 2.9992693 4.93E-12 7.8E-11 0.76 0.84 2.93 6.22 SMARCA5 SWI/SNF related, matrix associated, anti dependent regulator of chromatin, subfamily a, member 5 chr14 protein\_coding  
ENSG00000108002.13 1.1807326 3.09891654 9.29E-05 0.0007552 2.57 2.87 15.2 16.7 C14orf93 chromosome 14 open reading frame 93 chr14 lncRNA  
ENSG0000026094.2 1.4527937 0.0887454 0.0001218 1.76E-09 1.21 1.18 RP11-L406R5.3 gasterdin B chr17 protein\_coding  
ENSG00000073605.17 1.13161305 0.0041502 0.00451978 0.58 0.49 1.2 0.19 GSDMB galectin B chr17 protein\_coding  
ENSG00000073849.13 1.2972861 2.0196189 1.02E-17 2.04E-16 1 1.43 0.15 0.26 STEGAL1 STE beta-galactosidase alpha-2,6-sialyltransferase chr17 protein\_coding  
ENSG0000029826.1 1.2869488 0.8070811 4.71E-06 0.00064 0.01 0.26 0.46 RP11-467D6 chr17 antisense  
ENSG0000016554.8 1.6801142 6.1043909 9.94E-09 1.55E-08 28.35 27.35 1.14 1.17 ARDC2 arrestin domain containing 2 chr19 protein\_coding  
ENSG00000167889.11 2.3082953 3.3103339 3.15E-13 4.15E-12 0.54 0.39 3.29 2.88 MGA158B mannosyl (alpha-1,6-)-glycoprotein beta-1,6-N-acetyl-glucosaminyltransferase, bozyme B chr19 protein\_coding  
ENSG00000141184.4 1.2480455 0.0000000 0.0000000 0.0000000 0.24 0.24 0.16 0.24 KCL11 cholesteryl ester transfer protein 1 chr17 protein\_coding  
ENSG0000011671.8 1.0265098 3.6298812 3.85E-11 4.03E-10 9.95 6.83 3 2.49 SPB2 sol/Annoyane receptor domain and SCOS box containing 2 chr12 protein\_coding  
ENSG0000012726.12 1.87099468 0.44660636 2.43E-06 1.32E-05 0.06 0.06 0.23 0.34 ZBTB21 zinc finger and BTB domain containing 21 chr21 protein\_coding  
ENSG0000017844.5 2.05694572 2.7444029 0.0004512 0.00258242 0.29 0.29 0.19 0.29 UNC00843 long intergenic non-protein coding RNA R43 chr19 protein\_coding  
ENSG00000231760.4 1.2097577 0.3461729 1.73E-06 9.62E-06 0.49 0.44 0.09 0.19 RP11-350DZ -- chr16 antisense  
ENSG0000023329.1 1.3958569 0.0023236 1.07E-10 0.71E-09 0.09 0.09 0.09 0.11 RP11-448A1 chr17 lncRNA  
ENSG00000074611.1 5.4549042 1.27467519 0.00158008 0.0049521 0 0 0.01 0.02 CTA-243E7.1 -- chr22 antisense  
ENSG0000016885.14 2.0210329 2.1818841 7.14E-10 6.33E-09 0.26 0.24 0.18 1.65 FAM91A1 family with sequence similarity 91, member A1 chr8 protein\_coding  
ENSG0000027597.1 1.7844645 0.091448 0.0000000 0.0000000 0.37 0.62 1.63 0.86 RP11-961A1 chr17 protein\_coding  
ENSG0000008356.15 1.1861497 0.46272653 0.00147063 0.00467959 0.38 0.67 0.38 0.24 FKXD domain containing ion transport regulator 3 chr19 protein\_coding  
ENSG0000014219.14 2.1029372 1.5620732 1.57E-09 1.34E-08 0.16 0.27 1.04 1.42 C17orf80 chromosome 17 open reading frame 80 chr17 protein\_coding  
ENSG0000027264.1 1.520755 2.861027 0.0018008 0.0046950 0.44 0.44 0 0 0 RP11-30X15 chr17 lncRNA  
ENSG0000016489.11 1.1942687 3.27089558 6.11E-05 0.00052671 2.28 1.98 4.93 8.16 CAPZAI capping protein (actin filament) muscle Z-line, alpha 1 chr3 protein\_coding  
ENSG00000144674.15 5.6517482 3.2266592 2.22E-43 2.07E-41 0.04 0.04 0.134 3.66 GOLGA4 actin A4 chr3 protein\_coding  
ENSG0000020311.1 1.6853351 2.00035262 2.10E-07 1.36E-06 0.78 5.78 5.33 RP11-876N2 chr16 sense\_intronic  
ENSG00000092620.9 5.4141948 0.36720498 1.67E-22 4.84E-21 0.07 0.79 0.05 0 0 PALMD palmdiphen chr11 protein\_coding  
ENSG0000014022.12 1.3101818 0.0021725 2.17E-05 2.17E-05 22.8 22.8 0.16 1.269 CCKK ceramide kinase chr12 protein\_coding  
ENSG0000027627.1 1.27150108 0.10494717 3.44E-07 2.14E-06 0.35 0.12 1.36 1.49 RP11-182L1 -- chr15 antisense  
ENSG00000174032.15 1.84895166 0.9317454 5.40E-07 3.24E-06 0.06 0.028 0.84 0.8 SLCS2AS3 sulfate carrier family 25, member 30 chr13 protein\_coding  
ENSG00000164611.11 1.9842981 0.0718089 0.000119 1.58E-09 1.72 1.58 0.12 0.86 RAB31 member RAS oncogene family 134, member B chr18 protein\_coding  
ENSG0000019540.11 4.06439203 0.0712563 1.77E-14 2.69E-13 0.01 0.02 0.18 0.37 TCHH trichohyalin chr19 protein\_coding  
ENSG0000023453.8 1.4436558 0.6374579 0.00010226 0.00041131 0.09 0.25 0.37 0.85 ANKRD188 ankryn repeat domain 188 chr19 protein\_coding  
ENSG0000014153.12 1.71339538 1.3423238 8.42E-07 2.00E-06 0.15 0.15 0.78 1.49 FAM134B family with sequence similarity 134, member B chr19 protein\_coding  
ENSG0000019875.9 1.1330759 1.4318318 4.06E-06 2.12E-05 99.94 83.23 46.65 50257 RLPIA ribosomal protein L10a chr19 protein\_coding  
ENSG0000009686.13 1.39626687 0.1821847 0.0003882 0.0013707 0.21 0.14 0.47 0.77 MADCAM1 mucosal vascular addressin cell adhesion molecule 1 chr19 protein\_coding  
ENSG0000023461.7 1.97317459 3.074969 0.0008973 0.00439523 0.09 0.07 0.02 0.02 PRKCI1-AS1 PRKCI antisense RNA 1 chr19 protein\_coding  
ENSG0000013713.14 2.00349173 1.6682413 4.97E-09 3.97E-08 0.14 0.2 0.06 0.95 PPP1R2 protein phosphatase 2, regulatory subunit A, beta chr11 protein\_coding  
ENSG0000017468.19 5.19748251 2.896879 0.00538165 0.00488651 0.0 0 0.01 0.01 RIMS2 regulating synaptic membrane exocytosis 2 chr16 protein\_coding  
ENSG000001413.13 1.9501051 0.0000000 0.0000000 0.0000000 0.19 0.08 0.07 0.87 PPI1L1 peptidyl prolyl isomerase 1 (autosomal recessive) chr11 protein\_coding  
ENSG0000014062.16 2.2874666 3.62948 2.00E-13 2.69E-12 0.36 0.06 1.75 2.95 UBE3A ubiquitin protein ligase E3A chr15 protein\_coding  
ENSG0000012803.9 1.218973 0.0023235 1.07E-05 0.000481 0.09 0.09 0.09 2.09 HPS2 hypohidrotic syndrome 2 chr15 protein\_coding  
ENSG0000026464.1 1.18832971 1.0163741 0.0002943 0.0010441 0.41 0.24 0.11 0.12 RP4-561L2A -- chr21 lncRNA  
ENSG00000181938.12 1.30779571 5.0643911 1.756E-06 3.76E-05 6.92 6.07 21.48 21.41 GINS3 GINS complex subunit 3 (Paf3 homolog) chr16 protein\_coding  
ENSG00000129915.12 1.2971813 0.0000000 1.07E-05 1.07E-05 2.26 2.26 0.18 0.78 EPIC2 epoxide hydrolase 2 cytoplasmic chr16 protein\_coding  
ENSG0000016758.11 3.2874483 3.5703943 1.82E-23 6.56E-22 0.56 0.84 9.53 8.71 C15orf27 chromosome 15 open reading frame 27 chr15 protein\_coding  
ENSG00000176084.1 4.8894445 3.0622891 0.00188973 0.00419557 0 0 0.04 0.11 HTR3C 5-hydroxytryptamine (serotonin) receptor 3C, ionotropic chr11 protein\_coding  
ENSG0000017614.8 1.9086673 0.0000000 0.0000000 0.0000000 0.7 0.7 1.63 KCBT5B glycidyl transferase transposable element derived 5 chr16 protein\_coding  
ENSG0000013780.9 1.12109313 4.93548209 3.29E-05 0.00014524 20.58 19.26 12.24 10.66 GF2P4H general transcription factor H1, polypeptide 4, 52kDa chr6 protein\_coding  
ENSG00000125149.10 1.112942 3.8518397 0.00015201 0.0005967 2.45 2.61 7.56 7.11 C10orf90 chromosome 10 open reading frame 70 chr16 protein\_coding  
ENSG000001624.6 1.31311943 0.0000000 0.0000000 0.0027867 1.53 1.66 0.07 0.77 CCZC2H2 zinc finger, CCHC domain containing 24 chr6 protein\_coding  
ENSG0000015453.12 1.1043513 0.99447407 6.30E-34 3.51E-32 1.21 0.87 0 0 0 POLM3 PDC and LIM domain 3 chr4 protein\_coding  
ENSG00000100004.4 1.28473928 1.69645465 7.93E-05 0.00039667 1.03 0.45 0.04 0.45 HCVAS5 human HCV AS chr5 protein\_coding  
ENSG00000102762.7 2.4902492 0.2241987 6.78E-09 5.32E-08 0.2 0.06 0.87 1.05 HCAR2 hydroxybutyric acid receptor 2 chr12 protein\_coding  
ENSG0000013641.5 1.22077048 1.42984798 2.86E-10 2.70E-09 0.37 0.56 0.15 0.11 DDDCI1 dix domain containing 1 chr11 protein\_coding  
ENSG00000135241.5 1.21416018 0.0000000 0.0000000 0.0000000 0.12 0.12 0.06 0.53 PNLRA8 protein kinase phosphatase domain containing 8 chr11 protein\_coding  
ENSG00000149017.3 1.49461961 4.9307146 8.89E-46 9.62E-44 9.9 9.7 0.45 0.45 ROR2 receptor tyrosine kinase-like orphan receptor 2 chr9 protein\_coding  
ENSG0000023439.2 1.1049149 0.1305554 0.00050697 0.0140658 0.91 0.68 0.29 0.73 RP11-488P3 -- chr19 sense\_intronic  
ENSG0000014048.9 0.0298108 2.3135174 0.0101262 0.00350143 1.68 1.68 0.29 2.79 PUSP1 protein phosphatase 1 (RNA/RNP complex 1-interacting) chr18 protein\_coding  
ENSG00000271040.1 2.06112484 1.5415863 0.00173462 0.0003347 0 0.33 1.06 0.79 RPS-93K2L1 -- chr19 lncRNA  
ENSG00000268204.1 5.9710863 2.4147079 8.36E-05 0.00034052 0 0 0.38 0.23 CTD-324H1 -- chr19 antisense  
ENSG00000186330.8 1.2770885 0.0000000 0.0000000 0.0000000 0.01 0.02 0.07 0.07 NRP1 nuclear receptor interacting protein 1 chr19 protein\_coding  
ENSG00000128643 1.17521396 2.31904423 4.32E-08 3.03E-07 5.54 5.25 2.79 147 RNF208 ring finger protein 208 chr19 protein\_coding  
ENSG00000131469.11 1.13221391 0.1961638 0.0000000 0.0000000 80.55 99.16 37.0 42.38 RPL27 ribosomal protein L27 chr19 protein\_coding  
ENSG0000029531.9 4.91020659 3.0611096 0.0104505 0.02582742 0 0 0.05 0.01 RP11-293M1 -- chr14 antisense  
ENSG00000122641.9 1.3259741 2.786437 0.0094384 0.0246931 0.01 0.03 0 0 0 NHRBA inhibit, beta A chr19 protein\_coding  
ENSG00000268208.1 1.0034009 4.5058218 0.0000000 0.0000000 15.1 15.1 0.14 16.14 CTD-235D1 -- chr19 protein\_coding  
ENSG0000017257.6 1.3925603 2.0337029 2.60E-26 9.77E-25 0.78 0.86 0.03 0.12 PDE3A phosphodiesterase 3A, cGMP-inhibited chr12 protein\_coding  
ENSG00000269552.1 4.4688091 3.1062109 2.86E-34 1.61E-32 1.14 0.79 3.04 2.705 RP11-491L1 -- chr18 antisense  
ENSG00000153372.4 1.305392 7.4862403 6.26E-06 3.17E-08 91.8 48.5 47.31 MRLC2A myosin, light chain 3 regulatory chr18 protein\_coding  
ENSG0000009844.14 2.0782974 1.64079756 1.59E-09 1.38E-08 0.15 0.11 0.56 0.93 VTA1 vesicle (multivesicular body) trafficking 1 chr6 protein\_coding  
ENSG00000274712.1 2.5825494 1.3854734 1.53E-12 3.88E-11 0.28 0.3 1.92 2.72 RP11-147L1 -- chr17 lncRNA  
ENSG0000010744.13 1.0472803 0.0000000 0.0000000 0.0000000 0.06 0.06 0.06 0.66 CSK2 CSK2 interacting protein chr17 protein\_coding  
ENSG00000136560.12 2.5040566 0.1027964 2.83E-11 3.02E-10 0.14 0.18 0.67 1.97 TANK TRAF family member-associated NFkB activator chr2 protein\_coding  
ENSG0000016134.11 1.1143966 2.2804173 0.0003797 0.00141689 0.21 0.36 0.61 1.02 NAA15 NAA15-activator/transferase 15, Naa acylauric sulfoxide activating transcription factor 4 chr12 protein\_coding  
ENSG0000012572.13 2.81074845 0.0000000 0.0000000 0.0000000 46.4 29.7 26.04 AT4 26.04 AT4 chr22 protein\_coding  
ENSG0000016370.5 1.6327865 0.9603134 5.61E-06 2.85E-05 0.25 0.4 1.34 1.35 VMAC vimentin-type intermediate filament associated coiled-coil protein chr19 protein\_coding  
ENSG0000016280.15 1.926201 0.0000000 0.0000000 0.0000000 0.94 0.94 0.07 0.56 ALMA1 ADP-ribosylation factor-like 5A chr19 protein\_coding  
ENSG00000138152.8 4.1312041 1.9301309 1.13E-05 5.42E-05 0.01 0 0.31 0.12 BTBD16 BTB (POZ) domain containing 16 chr19 protein\_coding  
ENSG0000026882.1 0.40139403 0.8661836 1.79E-09 1.51E-08 0.02 0.01 0.34 0.33 CTD-309C6 -- chr19 sense\_intronic  
ENSG00000131286.1 1.6285165 3.842142 9.79E-17 6.17E-09 14.38 14.38 0.6 61.28 ONO2033 small nuclear RNA, C/D box 3A chr19 protein\_coding  
ENSG00000128346.9 1.0666669 0.0734494 0.009005 0.0267323 0.18 0.26 0.67 0.54 C22orf23 chromosome 22 open reading frame 23 chr22 protein\_coding  
ENSG0000018989.11 1.4432349 5.6577713 7.50E-07 4.40E-06 14.43 14.08 7.23 6.73 CUEC1 CUE domain containing 1 chr17 protein\_coding  
ENSG0000014171.6 1.18033475 0.0000000 0.0000000 0.0000000 5.4 14.4 4.87 TM7T10C RNA methyltransferase 10 homolog C (S. cerevisiae) chr17 protein\_coding  
ENSG00000146411.5 1.689339 1.178206 0.01883218 0.00419557 0.02 0.01 0.06 0.11 SLCA21A sulfate carrier family 2 (facilitated glucose transporter), member 12 chr6 protein\_coding  
ENSG00000119308.8 1.8470715 2.1254401 1.02E-48 1.30E-46 2.56 2.66 0 0.02 PPP1R3C protein phosphatase 1, regulatory subunit 3C chr10 protein\_coding  
ENSG00000101338.8 1.6281278 6.6810789 1.43E-06 4.01E-04 5.68 5.68 0.08 0.88 MTC1 mucosin, light chain 3 regulatory chr10 protein\_coding  
ENSG00000289391.1 1.9119754 1.522146 0.0018575 0.0007918 0.03 0.06 0.02 0.01 RP11-46E17 -- chr22 lncRNA  
ENSG00000230975.5 2.810444 0.280424 1.20E-06 9.68E-08 0.04 0.04 0.12 0.96 DVC1L1 synaptonemal complex central element protein 1-like chr19 protein\_coding  
ENSG0000018716.18 1.10483709 7.4540336 0.0002464 0.0009147 29.06 24.94 1.98 16.8 RCR breakpoint cluster region chr22 protein\_coding  
ENSG00000143333.6 1.0027969 1.2282474 1.27E-08 9.60E-08 0.98 1.51 0.4 0.43 RGS16 regulator of G-protein signaling 16 chr1 protein\_coding  
ENSG0000013846.7 1.6714712 1.12712 1.47E-07 2.63E-06 0.22 0.21 1.05 1.71 HECTS1 HECT and RLD domain containing E3 ubiquitin protein ligase 5 chr19 protein\_coding  
ENSG0000019627.9 2.966455 1.9539693 6.52E-17 1.23E-15 0.13 0.13 1.2 1.55 FAM217B family with sequence similarity 217, member B chr20 protein\_coding  
ENSG00000107731.1 1.2689527 0.408051 1.82E-06 8.43E-05 2.53 2.96 1.72 1.3 UNCSH5 unc-5 homolog B (C. elegans) chr10 protein\_coding  
ENSG00000270371.1 1.0064864 1.1243441 0.0005313 0.00131943 0.02 0.02 0.1 0.11 RP11-343C2 chr19 protein\_coding  
ENSG00000105640.11 1.2365117 10.174467 2.14E-15 3.54E-14 82.72 714.54 2.03 17.11 RP11-RLB1A ribosomal protein L18a chr19 protein\_coding  
ENSG0000012853.6 4.2807915 0.2693059 2.14E-13 2.87E-12 0.01 0.01 0.2 0.44 UNC00504 long intergenic non-protein coding RNA 504 chr18 lncRNA  
ENSG00000166011.1 1.8625036 0.6625036 1.57E-17 3.13E-16 52.46 52.46 0.48 4.87 KTK11 paired-like homeodomain 11 chr4 protein\_coding  
ENSG00000146360.13 1.1394123 6.2191304 1.47E-06 8.24E-06 37.97 32.

|                    |            |            |            |            |        |        |        |        |                       |                                                                                                          |                                            |                      |                      |
|--------------------|------------|------------|------------|------------|--------|--------|--------|--------|-----------------------|----------------------------------------------------------------------------------------------------------|--------------------------------------------|----------------------|----------------------|
| ENSG0000015240.11  | 1.28251252 | 163102906  | 0.00011155 | 0.00044381 | 1.31   | 0      | 1.21   | 248    | 574                   | HAU51                                                                                                    | HAUS augmin-like complex, subunit 1        | chr18                | protein_coding       |
| ENSG00000134006    | 1.47821909 | 163102906  | 0.00011155 | 0.00044381 | 1.31   | 0      | 1.21   | 248    | 574                   | HAU51                                                                                                    | HAUS augmin-like complex, subunit 1        | chr18                | protein_coding       |
| ENSG0000012319.14  | -1.0592379 | 76431283   | 0.00227299 | 0.00085384 | 121.75 | 0      | 102.94 | 72.51  | 7122                  | GPC1                                                                                                     | GPC PDZ domain containing family, member 1 | chr19                | protein_coding       |
| ENSG00000166448.13 | -3.6628925 | -0.1637023 | 7.00E-13   | 8.92E-12   | 0.35   | 0.07   | 0.02   | 0.01   | 0.01                  | TMEM130                                                                                                  | transmembrane protein 130                  | chr7                 | protein_coding       |
| ENSG00000131127.12 | -0.5494166 | 0.0009897  | 8.05E-16   | 3.75E-14   | 0.18   | 0      | 0.18   | 0      | 0.18                  | ZNF143                                                                                                   | zinc finger protein 143                    | chr4                 | protein_coding       |
| ENSG0000012789.61  | 1.98629448 | -1.8601781 | 0.00987167 | 0.02519005 | 0      | 0.21   | 0.02   | 0      | 0.28                  | TRH8-AS1                                                                                                 | TRH8 antisense RNA 1                       | chr7                 | processed_transcript |
| ENSG00000127744.4  | -5.531717  | -2.8643549 | 0.00130008 | 0.0499521  | 0.07   | 0.01   | 0.01   | 0      | 0                     | HLA3B79                                                                                                  | HLA class II antigen                       | chr1                 | incRNA               |
| ENSG00000186660.13 | 5.51613647 | 1.8906737  | 0.00340476 | 0.0125664  | 0      | 0.11   | 0.05   | 0.02   | 0.02                  | UNC103B9                                                                                                 | long intergenic non-protein coding RNA 319 | chr21                | incRNA               |
| ENSG00000104084.11 | -1.4969259 | 4.81511179 | 3.51E-07   | 2.18E-06   | 4.04   | 4.58   | 2.05   | 2.02   | NPF5B                 | inositol polyphosphate-5-phosphatase                                                                     | chr1                                       | protein_coding       |                      |
| ENSG00000104591.5  | -4.9032474 | 1.1064302  | 1.90E-26   | 8.95E-25   | 0.49   | 1.37   | 0.04   | 0.06   | ADRA1                 | adenosine cyclase beta 1                                                                                 | chr10                                      | protein_coding       |                      |
| ENSG0000017625.7   | 0.0094605  | 0.0031813  | 0.00394609 | 0.0030104  | 1.17   | 0.45   | 0.05   | 0.17   | ZNF543                | zinc finger protein 543                                                                                  | chr19                                      | protein_coding       |                      |
| ENSG00000152495.9  | -2.3473778 | -0.8099982 | 6.55E-06   | 3.29E-05   | 0.09   | 0.02   | 0.01   | 0.02   | CAMK4                 | calmodulin/calmodulin-dependent protein kinase IV                                                        | chr5                                       | protein_coding       |                      |
| ENSG0000012483.16  | 4.3052695  | 0.9399619  | 4.22E-17   | 1.11E-19   | 0.02   | 0.03   | 0.49   | 0.87   | CCDC138               | coiled-coil domain containing 18                                                                         | chr1                                       | protein_coding       |                      |
| ENSG00000126544.1  | 5.326735   | -2.8777865 | 0.0290522  | 0.0086312  | 0      | 0      | 0.54   | 0.05   | AC008060.8            | lincRNA                                                                                                  | chr7                                       | processed_transcript |                      |
| ENSG0000015161.12  | 3.7504661  | 0.56751084 | 6.70E-16   | 1.15E-14   | 0.02   | 0.09   | 0.06   | 0.89   | HLA-F antisense RNA 1 | HLA-F antisense RNA 1                                                                                    | chr3                                       | processed_transcript |                      |
| ENSG0000017501.12  | -7.816033  | 2.1758402  | 0.0047176  | 0.0167193  | 0      | 0.04   | 0      | 0      | CADAF1                | cell adhesion molecule 2                                                                                 | chr1                                       | protein_coding       |                      |
| ENSG00000171208.8  | 1.20228663 | 3.95149745 | 4.96E-05   | 0.00021199 | 1.1    | 0.92   | 2.79   | 3.41   | NETO2                 | neuropilin (NP) and toll-like (TLU)-like                                                                 | chr16                                      | protein_coding       |                      |
| ENSG0000017780.12  | -1.3592304 | 5.44446657 | 3.15E-06   | 1.68E-05   | 10.4   | 9.56   | 5.45   | 4.91   | PPFIA3                | protein tyrosine phosphatase, receptor type, f polypeptide (PTPRF), interacting protein (Spirn), alpha 3 | chr19                                      | protein_coding       |                      |
| ENSG00000170504.1  | 3.16333997 | 5.21743036 | 7.87E-24   | 2.50E-22   | 2.15   | 2.22   | 24.12  | 26.13  | RP11-420L9.1          | RP11-420L9.1                                                                                             | chr16                                      | antisense            |                      |
| ENSG00000163947.10 | 1.93484306 | 1.59678129 | 1.81E-08   | 1.33E-07   | 0.13   | 0.23   | 0.82   | 1.05   | ARHGEF3               | Rho guanine nucleotide exchange factor (GEF) 3                                                           | chr3                                       | protein_coding       |                      |
| ENSG00000087299.10 | 1.7902842  | 2.64227322 | 1.48E-08   | 1.11E-07   | 0.21   | 0.48   | 1.17   | 1.19   | L2HSDH                | L-2-hydroxyglutaryl dehydrogenase                                                                        | chr14                                      | protein_coding       |                      |
| ENSG00000103357.11 | 5.3136355  | 4.24507779 | 2.69E-27   | 1.09E-25   | 4.7    | 4.38   | 0.52   | 0.54   | GAB2                  | GAB2-associated binding protein 2                                                                        | chr1                                       | protein_coding       |                      |
| ENSG00000125611.1  | 5.80179215 | -2.5306812 | 0.0026535  | 0.0009747  | 0      | 0      | 0.39   | 0.12   | RP11-70C11.1          | RP11-70C11.1                                                                                             | chr1                                       | antisense            |                      |
| ENSG00000122764.2  | 5.30549889 | 4.96337402 | 1.03E-19   | 1.39E-18   | 0.9    | 0.84   | 4.11   | 46.98  | RP11-5407.1           | RP11-5407.1                                                                                              | chr1                                       | incRNA               |                      |
| ENSG00000125244.3  | 2.45372887 | -2.0293868 | 0.0408959  | 0.0187554  | 0.04   | 0      | 0      | 0.21   | RP11-761E2.2          | RP11-761E2.2                                                                                             | chr1                                       | antisense            |                      |
| ENSG00000160399.10 | -12.54975  | 3.49902168 | 1.27E-48   | 4.70E-66   | 5.41   | 7.42   | 0      | 0      | EPDR1                 | spermidin related 1                                                                                      | chr7                                       | protein_coding       |                      |
| ENSG00000170175.1  | 1.10491486 | 0.22777787 | 0.0010671  | 0.0138466  | 0.05   | 0.04   | 0.12   | 0.12   | C14-04407.1           | C14-04407.1                                                                                              | chr22                                      | sense_intronic       |                      |
| ENSG00000160507.6  | -1.2047397 | 5.29189607 | 3.41E-05   | 0.00150306 | 44.82  | 37.98  | 24.86  | 23     | NTHL1                 | thiophosphate II-like (I.E. coli)                                                                        | chr16                                      | protein_coding       |                      |
| ENSG00000126116.11 | 6.1282037  | -2.3082274 | 2.70E-05   | 0.0012094  | 0      | 0      | 0.18   | 0.11   | RP3-52K23.1           | RP3-52K23.1                                                                                              | chr6                                       | sense_intronic       |                      |
| ENSG0000012078.1   | 4.7821296  | -2.7332022 | 0.0038006  | 0.0465521  | 0      | 0      | 0.03   | 0.03   | RP4-734322            | RP4-734322                                                                                               | chr1                                       | antisense            |                      |
| ENSG00000133731.8  | 2.24185769 | 0.39750678 | 5.00E-08   | 3.49E-07   | 0.19   | 0.05   | 0.37   | 1.14   | IMPA1                 | inositol(myo)-[1or 4]-monophosphate 1                                                                    | chr12                                      | protein_coding       |                      |
| ENSG00000151021.7  | -4.1573262 | 9.24289918 | 4.88E-07   | 2.96E-06   | 470.83 | 476.75 | 240.24 | 218.88 | PHB2                  | proboscoid 2                                                                                             | chr12                                      | protein_coding       |                      |
| ENSG00000186705.7  | 2.865395   | 1.59464598 | 0.0001491  | 1.26E-05   | 0.95   | 0.95   | 0.27   | 0.45   | ZNF431                | zinc finger protein 431                                                                                  | chr12                                      | protein_coding       |                      |
| ENSG00000149825.5  | 2.6036075  | -2.3285497 | 0.0455824  | 0.01291303 | 0.02   | 0.02   | 0      | 0.32   | RP1-179N16.1          | RP1-179N16.1                                                                                             | chr6                                       | antisense            |                      |
| ENSG0000017266.2   | -5.3767252 | 0.0007562  | 0.00056512 | 0.00056512 | 0.24   | 0.24   | 0      | 0      | CRS2                  | cytoskeleton receptor, family 5, subfamily B, member 2                                                   | chr11                                      | protein_coding       |                      |
| ENSG0000017444.17  | 1.1095072  | 5.63462636 | 0.0012663  | 0.0049811  | 24.46  | 26.29  | 16.13  | 15.16  | CLK2                  | CLK-like kinase 2                                                                                        | chr17                                      | protein_coding       |                      |
| ENSG0000017435.5   | 1.7435219  | -0.4802057 | 0.00020204 | 0.00076235 | 0.07   | 0.16   | 0.3    | 0.73   | RP11-649A1.1          | RP11-649A1.1                                                                                             | chr17                                      | TEC                  |                      |
| ENSG00000124473.5  | 5.1579144  | -1.5774414 | 1.10E-06   | 6.26E-05   | 0.43   | 0.43   | 0.11   | 0.43   | RP11-501M1            | RP11-501M1                                                                                               | chr9                                       | incRNA               |                      |
| ENSG00000154573.4  | -8.8567099 | 3.3268537  | 1.68E-29   | 7.57E-28   | 20.02  | 29.49  | 2.24   | 2.3    | FAM72C7               | family with sequence similarity 72, member C                                                             | chr9                                       | protein_coding       |                      |
| ENSG00000126525.1  | -6.938121  | -1.881426  | 8.18E-08   | 5.55E-07   | 0.1    | 0.15   | 0      | 0      | AC005683.1            | AC005683.1                                                                                               | chr17                                      | incRNA               |                      |
| ENSG0000010187.14  | -3.8236134 | 6.60753315 | 7.73E-15   | 3.95E-14   | 4.35   | 4.35   | 0.28   | 4.35   | ALCOA1                | aluminum carrier organic anion transporter family, member 4A1                                            | chr2                                       | protein_coding       |                      |
| ENSG00000169888.6  | -1.1444013 | 7.59050093 | 7.04E-05   | 0.00029231 | 75.6   | 64.16  | 42.91  | 41.35  | ER2                   | immediate early response 2                                                                               | chr19                                      | protein_coding       |                      |
| ENSG00000123607.13 | 2.87387084 | 0.4032903  | 2.99E-11   | 3.18E-10   | 0.01   | 0.08   | 0.28   | 0.57   | ITC21B                | transmembrane repeat domain 21B                                                                          | chr19                                      | protein_coding       |                      |
| ENSG00000126388.1  | 2.8211819  | 0.51762372 | 1.61E-11   | 2.18E-10   | 0.07   | 0.02   | 1.34   | 1.32   | RP11-228D1            | RP11-228D1                                                                                               | chr1                                       | TEC                  |                      |
| ENSG00000164218.18 | 1.25879088 | 1.6254806  | 1.34E-05   | 6.35E-05   | 12.52  | 16.34  | 41.81  | 50.28  | STAU1                 | staufen double-stranded RNA binding protein 1                                                            | chr20                                      | protein_coding       |                      |
| ENSG00000155330.2  | 5.1969884  | -0.3067412 | 5.61E-15   | 8.96E-14   | 0      | 0.02   | 0.3    | 0.64   | UGKAP                 | leucine-rich repeats and guanylate kinase domain containing                                              | chr7                                       | protein_coding       |                      |
| ENSG00000136986.14 | 5.1623097  | 6.16964949 | 1.68E-07   | 1.23E-07   | 0.48   | 0.48   | 0.14   | 17.46  | WDK45                 | WD repeat domain 45                                                                                      | chr16                                      | protein_coding       |                      |
| ENSG00000134339.7  | -4.1024276 | -0.8608447 | 4.07E-11   | 4.25E-10   | 0.24   | 0.48   | 0      | 0.05   | SAI2                  | serum amyloid A2                                                                                         | chr11                                      | protein_coding       |                      |
| ENSG00000126269.15 | -0.7894621 | 0.0007603  | 0.00060335 | 0.00060335 | 0.09   | 0.09   | 0.09   | 0.09   | FAM125A               | family with sequence similarity 125, member A                                                            | chr6                                       | protein_coding       |                      |
| ENSG00000125571.5  | -0.4978417 | 1.51115564 | 2.59E-38   | 1.79E-36   | 0      | 0      | 1.37   | 1.09   | UNC0925               | long intergenic non-protein coding RNA 925                                                               | chr15                                      | incRNA               |                      |
| ENSG00000167508.9  | 1.2822206  | 5.89410784 | 1.01E-05   | 4.87E-05   | 16.14  | 13.73  | 46.25  | 50.73  | MVD                   | mevalonate (diphospho) decarboxylase                                                                     | chr1                                       | protein_coding       |                      |
| ENSG00000125714.3  | -2.862007  | 2.1206777  | 0.0002605  | 0.0006969  | 0.19   | 0.28   | 0      | 0.07   | RP11-11490            | RP11-11490                                                                                               | chr16                                      | antisense            |                      |
| ENSG00000127808.2  | -4.0327725 | 0.2780806  | 6.76E-27   | 2.65E-25   | 1.55   | 1      | 0.07   | 0.1    | RP11-66B24.2          | RP11-66B24.2                                                                                             | chr15                                      | crossed_transcript   |                      |
| ENSG00000108669.15 | -2.316105  | 6.22137144 | 9.79E-15   | 1.53E-13   | 27.64  | 23.23  | 4.68   | 7.15   | CYTH1                 | cytohesin 1                                                                                              | chr17                                      | protein_coding       |                      |
| ENSG0000011370.9   | -4.1717567 | -0.2376242 | 0.0001491  | 1.26E-05   | 0.95   | 0.95   | 0.27   | 0.45   | EHADH1                | ethyl-CoA hydratase-3-hydroxyacyl CoA dehydrogenase                                                      | chr19                                      | protein_coding       |                      |
| ENSG0000017992.5   | 1.0567628  | 3.61105187 | 0.0037311  | 0.0133735  | 2.92   | 3.28   | 9.68   | 7.45   | ZNF784                | zinc finger protein 784                                                                                  | chr17                                      | protein_coding       |                      |
| ENSG00000127878.12 | -1.7491558 | 2.25694799 | 4.51E-08   | 3.10E-07   | 1.6    | 1.87   | 0.6    | 0.78   | MEP1AD                | methionyl aminopeptidase type 1D (mitochondrial)                                                         | chr1                                       | protein_coding       |                      |
| ENSG00000186438.8  | 2.750219   | 6.16964949 | 1.68E-07   | 1.23E-07   | 0.48   | 0.48   | 0.14   | 17.46  | WDK45                 | WD repeat domain 45                                                                                      | chr16                                      | protein_coding       |                      |
| ENSG00000182128.8  | 1.2668967  | -0.4607258 | 5.40E-05   | 0.0002876  | 0.32   | 0.31   | 1.01   | 1.01   | HHIP1                 | HHIP-like 1                                                                                              | chr14                                      | protein_coding       |                      |
| ENSG00000169830.10 | 5.9793819  | -2.4123207 | 0.0001491  | 1.26E-05   | 0.95   | 0.95   | 0.27   | 0.45   | OPD3                  | OPD, zinc and double PHD fingers, family 3                                                               | chr14                                      | protein_coding       |                      |
| ENSG00000126854.1  | 2.17172429 | -1.9228925 | 0.0045943  | 0.01266454 | 0.05   | 0      | 0.26   | 0.08   | AC02806.1             | AC02806.1                                                                                                | chr19                                      | antisense            |                      |
| ENSG00000109018.1  | -2.4652123 | -2.4417514 | 0.0077015  | 0.0197784  | 0      | 0.07   | 0.32   | 0.24   | CTD-26191.1           | CTD-26191.1                                                                                              | chr1                                       | antisense            |                      |
| ENSG00000196089.9  | 1.1667163  | 1.44744446 | 0.0001491  | 1.26E-05   | 0.95   | 0.95   | 0.27   | 0.45   | HAUS2                 | haustorium 62kDa C-terminal like                                                                         | chr1                                       | protein_coding       |                      |
| ENSG00000183775.9  | -4.5037703 | -2.0511289 | 6.92E-06   | 3.47E-05   | 0.02   | 0.03   | 0      | 0      | CTD16B                | potassium channel tetramerization domain containing 16                                                   | chr5                                       | protein_coding       |                      |
| ENSG00000123610.1  | 2.3160591  | -1.1847825 | 6.85E-05   | 0.0002817  | 0.28   | 0.22   | 2.19   | 1.29   | AC037333.1            | AC037333.1                                                                                               | chr1                                       | protein_coding       |                      |
| ENSG00000105638.17 | 2.8598676  | 2.1159158  | 0.003461   | 0.0012013  | 0.07   | 0.02   | 0.02   | 0      | AKC3                  | Janus kinase 3                                                                                           | chr19                                      | protein_coding       |                      |
| ENSG00000171303.6  | -2.8584356 | 3.2745538  | 7.02E-19   | 1.56E-17   | 2.36   | 2.06   | 4.03   | 0.39   | CKNK3                 | potassium channel, two pore domain subfamily K, member 3                                                 | chr2                                       | protein_coding       |                      |
| ENSG00000125558.1  | 5.68288014 | -2.6655698 | 0.004761   | 0.0167191  | 0      | 0      | 0.11   | 0.12   | CC2D4D                | CC2D calcium-dependent domain containing 4D                                                              | chr1                                       | protein_coding       |                      |
| ENSG00000124203.5  | 6.9150219  | -2.1156918 | 1.89E-06   | 4.95E-07   | 0.48   | 0.48   | 0.14   | 0.05   | DNF5L1                | zinc finger protein 551                                                                                  | chr20                                      | protein_coding       |                      |
| ENSG00000126526.2  | -1.2137621 | 1.3816693  | 0.0029551  | 0.0107806  | 3.55   | 3.73   | 2.11   | 2.07   | CTD-25456.1           | CTD-25456.1                                                                                              | chr17                                      | protein_coding       |                      |
| ENSG00000124372.5  | -1.2587423 | 6.1804294  | 1.39E-05   | 6.58E-05   | 54.96  | 46.46  | 29.04  | 27.38  | EIF6                  | eukaryotic translation initiation factor 6                                                               | chr20                                      | protein_coding       |                      |
| ENSG00000183072.9  | 2.7595949  | 6.16964949 | 1.68E-07   | 1.23E-07   | 0.48   | 0.48   | 0.14   | 3.32   | NKX2-5                | NKX homeobox 5                                                                                           | chr3                                       | protein_coding       |                      |
| ENSG00000174197.15 | 2.10011164 | 5.9425302  | 6.27E-12   | 7.22E-11   | 0.31   | 0.31   | 1.62   | 1.91   | MGMA                  | MGA, MAX dimerization protein                                                                            | chr15                                      | protein_coding       |                      |
| ENSG00000125786.1  | 1.2018599  | 0.0007603  | 0.00060335 | 0.00060335 | 0.09   | 0.09   | 0.09   | 0.09   | DNH3B                 | small nuclear RNA host gene 18                                                                           | chr16                                      | incRNA               |                      |
| ENSG00000183899.11 | -1.4536947 | -0.9162945 | 0.0027661  | 0.0082745  | 0.5    | 0.21   | 0.14   | 0.2    | AC138969.4            | AC138969.4                                                                                               | chr15                                      | protein_coding       |                      |
| ENSG00000168769.11 | 2.9738344  | 1.0256188  | 1.63E-10   | 1.58E-09   | 0.01   | 0.02   | 0.07   | 0.18   | TE2                   | test methyltransferase diorganophosphate 2                                                               | chr1                                       | protein_coding       |                      |
| ENSG00000128881.5  | 1.2185929  | 1.4945636  | 1.93E-07   | 1.23E-07   | 0.48   | 0.48   | 0.14   | 0.45   | TBR2                  | tubulin kinase 2                                                                                         | chr25                                      | protein_coding       |                      |
| ENSG00000162552.13 | 3.04211646 | 0.07269092 | 6.43E-11   | 6.58E-10   | 0.04   | 0.04   | 0.44   | 0.52   | WNT4                  | wntless-type WNTV interaction site family, member 4                                                      | chr1                                       | protein_coding       |                      |
| ENSG00000170989.12 | -2.5753213 | 0.90139868 |            |            |        |        |        |        |                       |                                                                                                          |                                            |                      |                      |

|                   |            |            |           |            |       |       |      |      |              |                                                |
|-------------------|------------|------------|-----------|------------|-------|-------|------|------|--------------|------------------------------------------------|
| ENSG0000018608.3  | 2.8471137  | 0.7839661  | 2.48E-12  | 2.99E-11   | 0.06  | 0.06  | 0.36 | 0.81 | ZDHHC17      | zinc finger, DHHC-type containing 17           |
| ENSG0000018609.3  | 3.6450522  | 3.4789040  | 4.03E-25  | 1.41E-23   | 0.25  | 0.22  | 2.58 | 4.3  | BZB1C1       | bromodomain adjacent to zinc finger domain, 1A |
| ENSG0000018610.3  | 1.1430325  | 0.1802505  | 1.90E-05  | 1.00E-05   | 0.39  | 0.39  | 0.49 | 0.2  | RPL11-15A3.3 |                                                |
| ENSG00000117010.4 | 1.2596542  | 0.0831018  | 0.0014952 | 0.00475159 | 0.21  | 0.13  | 0.53 | 0.57 | ZNF654       | zinc finger protein 684                        |
| ENSG0000018611.3  | 1.8705925  | 1.3494088  | 0.0142213 | 0.00453952 | 0.12  | 0.04  | 0.45 | 0.36 | RPL11-200P2  |                                                |
| ENSG0000018612.3  | 3.3314568  | 2.7691469  | 0.0011217 | 0.0011217  | 0.02  | 0.02  | 0.02 | 0.04 | CGFR2        | cytokine growth factor receptor 2              |
| ENSG0000024591.5  | 5.57358239 | 0.02138063 | 3.53E-18  | 7.32E-17   | 0.0   | 0.11  | 4.57 | 3.23 | RPL11-661A1  |                                                |
| ENSG0000024591.5  | 3.0897468  | 4.6804158  | 9.93E-23  | 2.9E-21    | 5.52  | 6.31  | 1.08 | 0.83 | NABP3        | NEDD4 binding protein 3                        |
| ENSG0000024591.5  | 3.3699296  | 0.0000000  | 0.0000000 | 0.0000000  | 0.0   | 0.0   | 0.0  | 0.0  | MAP1B        | microtubule-associated protein 1B              |
| ENSG0000024591.5  | 2.3401521  | 5.22217663 | 9.69E-15  | 1.52E-13   | 19.82 | 20.93 | 5.53 | 5.18 | FOXO2        | forkhead box C2                                |
| ENSG0000017682.5  | 3.5719356  | 2.7614602  | 0.003237  | 0.0049156  | 0.01  | 0.06  | 0.01 | 0.0  | ECFAB31      | EF-hand calcium binding domain 13              |
| ENSG0000017682.5  | 3.5719356  | 2.7614602  | 0.003237  | 0.0049156  | 0.01  | 0.06  | 0.01 | 0.0  | MAP1B        | microtubule-associated protein 1B              |
| ENSG0000017682.5  | 3.5719356  | 2.7614602  | 0.003237  | 0.0049156  | 0.01  | 0.06  | 0.01 | 0.0  | ECFAB31      | EF-hand calcium binding domain 13              |
| ENSG0000017682.5  | 3.5719356  | 2.7614602  | 0.003237  | 0.0049156  | 0.01  | 0.06  | 0.01 | 0.0  | MAP1B        | microtubule-associated protein 1B              |
| ENSG0000017682.5  | 3.5719356  | 2.7614602  | 0.003237  | 0.0049156  | 0.01  | 0.06  | 0.01 | 0.0  | ECFAB31      | EF-hand calcium binding domain 13              |
| ENSG0000017682.5  | 3.5719356  | 2.7614602  | 0.003237  | 0.0049156  | 0.01  | 0.06  | 0.01 | 0.0  | MAP1B        | microtubule-associated protein 1B              |
| ENSG0000017682.5  | 3.5719356  | 2.7614602  | 0.003237  | 0.0049156  | 0.01  | 0.06  | 0.01 | 0.0  | ECFAB31      | EF-hand calcium binding domain 13              |
| ENSG0000017682.5  | 3.5719356  | 2.7614602  | 0.003237  | 0.0049156  | 0.01  | 0.06  | 0.01 | 0.0  | MAP1B        | microtubule-associated protein 1B              |
| ENSG0000017682.5  | 3.5719356  | 2.7614602  | 0.003237  | 0.0049156  | 0.01  | 0.06  | 0.01 | 0.0  | ECFAB31      | EF-hand calcium binding domain 13              |
| ENSG0000017682.5  | 3.5719356  | 2.7614602  | 0.003237  | 0.0049156  | 0.01  | 0.06  | 0.01 | 0.0  | MAP1B        | microtubule-associated protein 1B              |
| ENSG0000017682.5  | 3.5719356  | 2.7614602  | 0.003237  | 0.0049156  | 0.01  | 0.06  | 0.01 | 0.0  | ECFAB31      | EF-hand calcium binding domain 13              |
| ENSG0000017682.5  | 3.5719356  | 2.7614602  | 0.003237  | 0.0049156  | 0.01  | 0.06  | 0.01 | 0.0  | MAP1B        | microtubule-associated protein 1B              |
| ENSG0000017682.5  | 3.5719356  | 2.7614602  | 0.003237  | 0.0049156  | 0.01  | 0.06  | 0.01 | 0.0  | ECFAB31      | EF-hand calcium binding domain 13              |
| ENSG0000017682.5  | 3.5719356  | 2.7614602  | 0.003237  | 0.0049156  | 0.01  | 0.06  | 0.01 | 0.0  | MAP1B        | microtubule-associated protein 1B              |
| ENSG0000017682.5  | 3.5719356  | 2.7614602  | 0.003237  | 0.0049156  | 0.01  | 0.06  | 0.01 | 0.0  | ECFAB31      | EF-hand calcium binding domain 13              |
| ENSG0000017682.5  | 3.5719356  | 2.7614602  | 0.003237  | 0.0049156  | 0.01  | 0.06  | 0.01 | 0.0  | MAP1B        | microtubule-associated protein 1B              |
| ENSG0000017682.5  | 3.5719356  | 2.7614602  | 0.003237  | 0.0049156  | 0.01  | 0.06  | 0.01 | 0.0  | ECFAB31      | EF-hand calcium binding domain 13              |
| ENSG0000017682.5  | 3.5719356  | 2.7614602  | 0.003237  | 0.0049156  | 0.01  | 0.06  | 0.01 | 0.0  | MAP1B        | microtubule-associated protein 1B              |
| ENSG0000017682.5  | 3.5719356  | 2.7614602  | 0.003237  | 0.0049156  | 0.01  | 0.06  | 0.01 | 0.0  | ECFAB31      | EF-hand calcium binding domain 13              |
| ENSG0000017682.5  | 3.5719356  | 2.7614602  | 0.003237  | 0.0049156  | 0.01  | 0.06  | 0.01 | 0.0  | MAP1B        | microtubule-associated protein 1B              |
| ENSG0000017682.5  | 3.5719356  | 2.7614602  | 0.003237  | 0.0049156  | 0.01  | 0.06  | 0.01 | 0.0  | ECFAB31      | EF-hand calcium binding domain 13              |
| ENSG0000017682.5  | 3.5719356  | 2.7614602  | 0.003237  | 0.0049156  | 0.01  | 0.06  | 0.01 | 0.0  | MAP1B        | microtubule-associated protein 1B              |
| ENSG0000017682.5  | 3.5719356  | 2.7614602  | 0.003237  | 0.0049156  | 0.01  | 0.06  | 0.01 | 0.0  | ECFAB31      | EF-hand calcium binding domain 13              |
| ENSG0000017682.5  | 3.5719356  | 2.7614602  | 0.003237  | 0.0049156  | 0.01  | 0.06  | 0.01 | 0.0  | MAP1B        | microtubule-associated protein 1B              |
| ENSG0000017682.5  | 3.5719356  | 2.7614602  | 0.003237  | 0.0049156  | 0.01  | 0.06  | 0.01 | 0.0  | ECFAB31      | EF-hand calcium binding domain 13              |
| ENSG0000017682.5  | 3.5719356  | 2.7614602  | 0.003237  | 0.0049156  | 0.01  | 0.06  | 0.01 | 0.0  | MAP1B        | microtubule-associated protein 1B              |
| ENSG0000017682.5  | 3.5719356  | 2.7614602  | 0.003237  | 0.0049156  | 0.01  | 0.06  | 0.01 | 0.0  | ECFAB31      | EF-hand calcium binding domain 13              |
| ENSG0000017682.5  | 3.5719356  | 2.7614602  | 0.003237  | 0.0049156  | 0.01  | 0.06  | 0.01 | 0.0  | MAP1B        | microtubule-associated protein 1B              |
| ENSG0000017682.5  | 3.5719356  | 2.7614602  | 0.003237  | 0.0049156  | 0.01  | 0.06  | 0.01 | 0.0  | ECFAB31      | EF-hand calcium binding domain 13              |
| ENSG0000017682.5  | 3.5719356  | 2.7614602  | 0.003237  | 0.0049156  | 0.01  | 0.06  | 0.01 | 0.0  | MAP1B        | microtubule-associated protein 1B              |
| ENSG0000017682.5  | 3.5719356  | 2.7614602  | 0.003237  | 0.0049156  | 0.01  | 0.06  | 0.01 | 0.0  | ECFAB31      | EF-hand calcium binding domain 13              |
| ENSG0000017682.5  | 3.5719356  | 2.7614602  | 0.003237  | 0.0049156  | 0.01  | 0.06  | 0.01 | 0.0  | MAP1B        | microtubule-associated protein 1B              |
| ENSG0000017682.5  | 3.5719356  | 2.7614602  | 0.003237  | 0.0049156  | 0.01  | 0.06  | 0.01 | 0.0  | ECFAB31      | EF-hand calcium binding domain 13              |
| ENSG0000017682.5  | 3.5719356  | 2.7614602  | 0.003237  | 0.0049156  | 0.01  | 0.06  | 0.01 | 0.0  | MAP1B        | microtubule-associated protein 1B              |
| ENSG0000017682.5  | 3.5719356  | 2.7614602  | 0.003237  | 0.0049156  | 0.01  | 0.06  | 0.01 | 0.0  | ECFAB31      | EF-hand calcium binding domain 13              |
| ENSG0000017682.5  | 3.5719356  | 2.7614602  | 0.003237  | 0.0049156  | 0.01  | 0.06  | 0.01 | 0.0  | MAP1B        | microtubule-associated protein 1B              |
| ENSG0000017682.5  | 3.5719356  | 2.7614602  | 0.003237  | 0.0049156  | 0.01  | 0.06  | 0.01 | 0.0  | ECFAB31      | EF-hand calcium binding domain 13              |
| ENSG0000017682.5  | 3.5719356  | 2.7614602  | 0.003237  | 0.0049156  | 0.01  | 0.06  | 0.01 | 0.0  | MAP1B        | microtubule-associated protein 1B              |
| ENSG0000017682.5  | 3.5719356  | 2.7614602  | 0.003237  | 0.0049156  | 0.01  | 0.06  | 0.01 | 0.0  | ECFAB31      | EF-hand calcium binding domain 13              |
| ENSG0000017682.5  | 3.5719356  | 2.7614602  | 0.003237  | 0.0049156  | 0.01  | 0.06  | 0.01 | 0.0  | MAP1B        | microtubule-associated protein 1B              |
| ENSG0000017682.5  | 3.5719356  | 2.7614602  | 0.003237  | 0.0049156  | 0.01  | 0.06  | 0.01 | 0.0  | ECFAB31      | EF-hand calcium binding domain 13              |
| ENSG0000017682.5  | 3.5719356  | 2.7614602  | 0.003237  | 0.0049156  | 0.01  | 0.06  | 0.01 | 0.0  | MAP1B        | microtubule-associated protein 1B              |
| ENSG0000017682.5  | 3.5719356  | 2.7614602  | 0.003237  | 0.0049156  | 0.01  | 0.06  | 0.01 | 0.0  | ECFAB31      | EF-hand calcium binding domain 13              |
| ENSG0000017682.5  | 3.5719356  | 2.7614602  | 0.003237  | 0.0049156  | 0.01  | 0.06  | 0.01 | 0.0  | MAP1B        | microtubule-associated protein 1B              |
| ENSG0000017682.5  | 3.5719356  | 2.7614602  | 0.003237  | 0.0049156  | 0.01  | 0.06  | 0.01 | 0.0  | ECFAB31      | EF-hand calcium binding domain 13              |
| ENSG0000017682.5  | 3.5719356  | 2.7614602  | 0.003237  | 0.0049156  | 0.01  | 0.06  | 0.01 | 0.0  | MAP1B        | microtubule-associated protein 1B              |
| ENSG0000017682.5  | 3.5719356  | 2.7614602  | 0.003237  | 0.0049156  | 0.01  | 0.06  | 0.01 | 0.0  | ECFAB31      | EF-hand calcium binding domain 13              |
| ENSG0000017682.5  | 3.5719356  | 2.7614602  | 0.003237  | 0.0049156  | 0.01  | 0.06  | 0.01 | 0.0  | MAP1B        | microtubule-associated protein 1B              |
| ENSG0000017682.5  | 3.5719356  | 2.7614602  | 0.003237  | 0.0049156  | 0.01  | 0.06  | 0.01 | 0.0  | ECFAB31      | EF-hand calcium binding domain 13              |
| ENSG0000017682.5  | 3.5719356  | 2.7614602  | 0.003237  | 0.0049156  | 0.01  | 0.06  | 0.01 | 0.0  | MAP1B        | microtubule-associated protein 1B              |
| ENSG0000017682.5  | 3.5719356  | 2.7614602  | 0.003237  | 0.0049156  | 0.01  | 0.06  | 0.01 | 0.0  | ECFAB31      | EF-hand calcium binding domain 13              |
| ENSG0000017682.5  | 3.5719356  | 2.7614602  | 0.003237  | 0.0049156  | 0.01  | 0.06  | 0.01 | 0.0  | MAP1B        | microtubule-associated protein 1B              |
| ENSG0000017682.5  | 3.5719356  | 2.7614602  | 0.003237  | 0.0049156  | 0.01  | 0.06  | 0.01 | 0.0  | ECFAB31      | EF-hand calcium binding domain 13              |
| ENSG0000017682.5  | 3.5719356  | 2.7614602  | 0.003237  | 0.0049156  | 0.01  | 0.06  | 0.01 | 0.0  | MAP1B        | microtubule-associated protein 1B              |
| ENSG0000017682.5  | 3.5719356  | 2.7614602  | 0.003237  | 0.0049156  | 0.01  | 0.06  | 0.01 | 0.0  | ECFAB31      | EF-hand calcium binding domain 13              |
| ENSG0000017682.5  | 3.5719356  | 2.7614602  | 0.003237  | 0.0049156  | 0.01  | 0.06  | 0.01 | 0.0  | MAP1B        | microtubule-associated protein 1B              |
| ENSG0000017682.5  | 3.5719356  | 2.7614602  | 0.003237  | 0.0049156  | 0.01  | 0.06  | 0.01 | 0.0  | ECFAB31      | EF-hand calcium binding domain 13              |
| ENSG0000017682.5  | 3.5719356  | 2.7614602  | 0.003237  | 0.0049156  | 0.01  | 0.06  | 0.01 | 0.0  | MAP1B        | microtubule-associated protein 1B              |
| ENSG0000017682.5  | 3.5719356  | 2.7614602  | 0.003237  | 0.0049156  | 0.01  | 0.06  | 0.01 | 0.0  | ECFAB31      | EF-hand calcium binding domain 13              |
| ENSG0000017682.5  | 3.5719356  | 2.7614602  | 0.003237  | 0.0049156  | 0.01  | 0.06  | 0.01 | 0.0  | MAP1B        | microtubule-associated protein 1B              |
| ENSG0000017682.5  | 3.5719356  | 2.7614602  | 0.003237  | 0.0049156  | 0.01  | 0.06  | 0.01 | 0.0  | ECFAB31      | EF-hand calcium binding domain 13              |
| ENSG0000017682.5  | 3.5719356  | 2.7614602  | 0.003237  | 0.0049156  | 0.01  | 0.06  | 0.01 | 0.0  | MAP1B        | microtubule-associated protein 1B              |
| ENSG0000017682.5  | 3.5719356  | 2.7614602  | 0.003237  | 0.0049156  | 0.01  | 0.06  | 0.01 | 0.0  | ECFAB31      | EF-hand calcium binding domain 13              |
| ENSG0000017682.5  | 3.5719356  | 2.7614602  | 0.003237  | 0.0049156  | 0.01  | 0.06  | 0.01 | 0.0  | MAP1B        | microtubule-associated protein 1B              |
| ENSG0000017682.5  | 3.5719356  | 2.7614602  | 0.003237  | 0.0049156  | 0.01  | 0.06  | 0.01 | 0.0  | ECFAB31      | EF-hand calcium binding domain 13              |
| ENSG0000017682.5  | 3.5719356  | 2.7614602  | 0.003237  | 0.0049156  | 0.01  | 0.06  | 0.01 | 0.0  | MAP1B        | microtubule-associated protein 1B              |
| ENSG0000017682.5  | 3.5719356  | 2.7614602  | 0.003237  | 0.0049156  | 0.01  | 0.06  | 0.01 | 0.0  | ECFAB31      | EF-hand calcium binding domain 13              |
| ENSG0000017682.5  | 3.5719356  | 2.7614602  | 0.003237  | 0.0049156  | 0.01  | 0.06  | 0.01 | 0.0  | MAP1B        | microtubule-associated protein 1B              |
| ENSG0000017682.5  | 3.5719356  | 2.7614602  | 0.003237  | 0.0049156  | 0.01  | 0.06  | 0.01 | 0.0  | ECFAB31      | EF-hand calcium binding domain 13              |
| ENSG0000017682.5  | 3.5719356  | 2.7614602  | 0.003237  | 0.0049156  | 0.01  | 0.06  | 0.01 | 0.0  | MAP1B        | microtubule-associated protein 1B              |
| ENSG0000017682.5  | 3.5719356  | 2.7614602  | 0.003237  | 0.0049156  | 0.01  | 0.06  | 0.01 | 0.0  | ECFAB31      | EF-hand calcium binding domain 13              |
| ENSG0000017682.5  | 3.5719356  | 2.7614602  | 0.003237  | 0.0049156  | 0.01  | 0.06  | 0.01 | 0.0  | MAP1B        | microtubule-associated protein 1B              |
| ENSG0000017682.5  | 3.5719356  | 2.7614602  | 0.003237  | 0.0049156  | 0.01  | 0.06  | 0.01 | 0.0  | ECFAB31      | EF-hand calcium binding domain 13              |
| ENSG0000017682.5  | 3.5719356  | 2.7614602  | 0.003237  | 0.0049156  | 0.01  | 0.06  | 0.01 | 0.0  | MAP1B        | microtubule-associated protein 1B              |
| ENSG0000017682.5  | 3.5719356  | 2.7614602  | 0.003237  | 0.0049156  | 0.01  | 0.06  | 0.01 | 0.0  | ECFAB31      | EF-hand calcium binding domain 13              |
| ENSG0000017682.5  | 3.5719356  | 2.7614602  | 0.003237  | 0.0049156  | 0.01  | 0.06  | 0.01 | 0.0  | MAP1B        | microtubule-associated protein 1B              |
| ENSG0000017682.5  | 3.5719356  | 2.7614602  | 0.003237  | 0.0049156  | 0.01  | 0.06  | 0.01 | 0.0  | ECFAB31      | EF-hand calcium binding domain 13              |
| ENSG0000017682.5  | 3.5719356  | 2.7614602  | 0.003237  | 0.0049156  | 0.01  | 0.06  | 0.01 | 0.0  | MAP1B        | microtubule-associated protein 1B              |
| ENSG0000017682.5  | 3.5719356  | 2.7614602  | 0.003237  | 0.0049156  | 0.01  | 0.06  | 0.01 | 0.0  | ECFAB31      | EF-hand calcium binding domain 13              |
| ENSG0000017682.5  | 3.5719356  | 2.7614602  | 0.003237  | 0.0049156  | 0.01  | 0.06  | 0.01 | 0.0  | MAP1B        | microtubule-associated protein 1B              |
| ENSG0000017682.5  | 3.5719356  | 2.7614602  | 0.003237  | 0.0049156  | 0.01  | 0.06  | 0.01 | 0.0  | ECFAB31      | EF-hand calcium binding domain 13              |
| ENSG0000017682.5  | 3.5719356  | 2.7614602  | 0.00323   |            |       |       |      |      |              |                                                |

|                    |            |            |          |          |           |       |       |        |                                                                                        |                                      |                                |                            |                |                |
|--------------------|------------|------------|----------|----------|-----------|-------|-------|--------|----------------------------------------------------------------------------------------|--------------------------------------|--------------------------------|----------------------------|----------------|----------------|
| ENSG0000013774.18  | 1.02130442 | 515406678  | 00041612 | 00014726 | 133.2     | 8.25  | 9.09  | MAPK15 | mitogen-activated protein kinase kinase 5                                              | chr15                                | protein_coding                 |                            |                |                |
| ENSG00000140146    | 1.01094441 | 108187717  | 44779    | 8.556    | -1.01     | 0.13  | 0.41  | DNAH21 | dynen, axonemal, heavy chain h11                                                       | chr7                                 | protein_coding                 |                            |                |                |
| ENSG0000013861.1   | 1.01312861 | 116837710  | 10000000 | 5.476    | -0.05     | 0.13  | 0.69  | OMAI   | 32n metalloproteinase                                                                  | chr1                                 | protein_coding                 |                            |                |                |
| ENSG0000016880.15  | 1.07076163 | 402269781  | 5106     | 1.32     | -0.07     | 0.44  | 0.57  | 312    | synthrophin, beta 2 (phosphoinositide-associated protein A1, 590Da, basic component 2) | chr16                                | protein_coding                 |                            |                |                |
| ENSG0000022842.32  | 1.07086457 | 25485333   | 00002635 | 0.009747 | 0.0       | 0.27  | 0     | 0      | SLC43B3                                                                                | Na+/K+ cotransporter 3               | chr1                           | lncRNA                     |                |                |
| ENSG0000010011.11  | 1.74617399 | -0.2085451 | 9246     | 1.55     | 0.00      | 0.04  | 0.2   | 0.4    | SLC25A40                                                                               | solute carrier family 25, member 40  | chr1                           | protein_coding             |                |                |
| ENSG0000013858.12  | 2.7295367  | 27493902   | 4366     | 1.64     | -1.5      | 0.12  | 0.18  | 1.2    | 221                                                                                    | tyrosine kinase 1                    | chr2                           | protein_coding             |                |                |
| ENSG00000134769.20 | 6.7995357  | 21050049   | 5256     | -1.46    | -1.22     | 0.17  | 0.16  | 0      | 0                                                                                      | DTNA                                 | dytrolein, alpha               | chr18                      | protein_coding |                |
| ENSG0000013701.14  | 1.497026   | 15170825   | 4336     | 0.55     | -0.05     | 0.39  | 1381  | 11     | ENKST2                                                                                 | connexin 20                          | chr1                           | protein_coding             |                |                |
| ENSG00000228192.6  | 1.3126548  | 04084587   | 1206     | 1.33     | 1.66      | -1.2  | 0.84  | 152    | 0.1                                                                                    | 0.25                                 | RP11-342M1.1                   | antisense                  |                |                |
| ENSG0000016402.11  | 3.7746209  | 18751861   | 4798     | -1.19    | -1.07     | 0.08  | 0.02  | 0.96   | 0.91                                                                                   | L20RA                                | interleukin 20 receptor, alpha | chr6                       | protein_coding |                |
| ENSG0000016701.12  | 1.00076163 | 20000000   | 00001188 | 0.004945 | 0.0       | 0.45  | 29.63 | 18.4   | ARMT1                                                                                  | armino acid transferase containing 6 | chr19                          | protein_coding             |                |                |
| ENSG00000234965.2  | 6.189265   | -2.439594  | 1746     | -0.05    | 0.0020031 | 0.15  | 0.16  | 0      | 0                                                                                      | SHISA8                               | family member 8                | chr22                      | protein_coding |                |
| ENSG00000204962.1  | 5.509712   | 158021     | 4766     | -1.56    | -1.08     | 0.00  | 0.11  | 0      | 0                                                                                      | RP11-380I1.1                         | antisense                      |                            |                |                |
| ENSG00000204032.12 | 5.245598   | -1.054298  | 4186     | -1.99    | -0.9      | 0.07  | 0.08  | 0.04   | 0.02                                                                                   | KIAA2022                             | KIAA2022                       | chr1                       | lncRNA         |                |
| ENSG00000138193.13 | 2.44771903 | 15581495   | 6738     | 1.22     | 7.00      | -1.11 | 0.07  | 0.03   | 0.31                                                                                   | 0.47                                 | PLC1                           | phospholipase C, epsilon 1 | chr10          | protein_coding |
| ENSG00000138193.13 | 2.44771903 | 15581495   | 6738     | 1.22     | 7.00      | -1.11 | 0.07  | 0.03   | 0.31                                                                                   | 0.47                                 | PLC1                           | phospholipase C, epsilon 1 | chr10          | protein_coding |
| ENSG00000138193.13 | 2.44771903 | 15581495   | 6738     | 1.22     | 7.00      | -1.11 | 0.07  | 0.03   | 0.31                                                                                   | 0.47                                 | PLC1                           | phospholipase C, epsilon 1 | chr10          | protein_coding |
| ENSG00000138193.13 | 2.44771903 | 15581495   | 6738     | 1.22     | 7.00      | -1.11 | 0.07  | 0.03   | 0.31                                                                                   | 0.47                                 | PLC1                           | phospholipase C, epsilon 1 | chr10          | protein_coding |
| ENSG00000138193.13 | 2.44771903 | 15581495   | 6738     | 1.22     | 7.00      | -1.11 | 0.07  | 0.03   | 0.31                                                                                   | 0.47                                 | PLC1                           | phospholipase C, epsilon 1 | chr10          | protein_coding |
| ENSG00000138193.13 | 2.44771903 | 15581495   | 6738     | 1.22     | 7.00      | -1.11 | 0.07  | 0.03   | 0.31                                                                                   | 0.47                                 | PLC1                           | phospholipase C, epsilon 1 | chr10          | protein_coding |
| ENSG00000138193.13 | 2.44771903 | 15581495   | 6738     | 1.22     | 7.00      | -1.11 | 0.07  | 0.03   | 0.31                                                                                   | 0.47                                 | PLC1                           | phospholipase C, epsilon 1 | chr10          | protein_coding |
| ENSG00000138193.13 | 2.44771903 | 15581495   | 6738     | 1.22     | 7.00      | -1.11 | 0.07  | 0.03   | 0.31                                                                                   | 0.47                                 | PLC1                           | phospholipase C, epsilon 1 | chr10          | protein_coding |
| ENSG00000138193.13 | 2.44771903 | 15581495   | 6738     | 1.22     | 7.00      | -1.11 | 0.07  | 0.03   | 0.31                                                                                   | 0.47                                 | PLC1                           | phospholipase C, epsilon 1 | chr10          | protein_coding |
| ENSG00000138193.13 | 2.44771903 | 15581495   | 6738     | 1.22     | 7.00      | -1.11 | 0.07  | 0.03   | 0.31                                                                                   | 0.47                                 | PLC1                           | phospholipase C, epsilon 1 | chr10          | protein_coding |
| ENSG00000138193.13 | 2.44771903 | 15581495   | 6738     | 1.22     | 7.00      | -1.11 | 0.07  | 0.03   | 0.31                                                                                   | 0.47                                 | PLC1                           | phospholipase C, epsilon 1 | chr10          | protein_coding |
| ENSG00000138193.13 | 2.44771903 | 15581495   | 6738     | 1.22     | 7.00      | -1.11 | 0.07  | 0.03   | 0.31                                                                                   | 0.47                                 | PLC1                           | phospholipase C, epsilon 1 | chr10          | protein_coding |
| ENSG00000138193.13 | 2.44771903 | 15581495   | 6738     | 1.22     | 7.00      | -1.11 | 0.07  | 0.03   | 0.31                                                                                   | 0.47                                 | PLC1                           | phospholipase C, epsilon 1 | chr10          | protein_coding |
| ENSG00000138193.13 | 2.44771903 | 15581495   | 6738     | 1.22     | 7.00      | -1.11 | 0.07  | 0.03   | 0.31                                                                                   | 0.47                                 | PLC1                           | phospholipase C, epsilon 1 | chr10          | protein_coding |
| ENSG00000138193.13 | 2.44771903 | 15581495   | 6738     | 1.22     | 7.00      | -1.11 | 0.07  | 0.03   | 0.31                                                                                   | 0.47                                 | PLC1                           | phospholipase C, epsilon 1 | chr10          | protein_coding |
| ENSG00000138193.13 | 2.44771903 | 15581495   | 6738     | 1.22     | 7.00      | -1.11 | 0.07  | 0.03   | 0.31                                                                                   | 0.47                                 | PLC1                           | phospholipase C, epsilon 1 | chr10          | protein_coding |
| ENSG00000138193.13 | 2.44771903 | 15581495   | 6738     | 1.22     | 7.00      | -1.11 | 0.07  | 0.03   | 0.31                                                                                   | 0.47                                 | PLC1                           | phospholipase C, epsilon 1 | chr10          | protein_coding |
| ENSG00000138193.13 | 2.44771903 | 15581495   | 6738     | 1.22     | 7.00      | -1.11 | 0.07  | 0.03   | 0.31                                                                                   | 0.47                                 | PLC1                           | phospholipase C, epsilon 1 | chr10          | protein_coding |
| ENSG00000138193.13 | 2.44771903 | 15581495   | 6738     | 1.22     | 7.00      | -1.11 | 0.07  | 0.03   | 0.31                                                                                   | 0.47                                 | PLC1                           | phospholipase C, epsilon 1 | chr10          | protein_coding |
| ENSG00000138193.13 | 2.44771903 | 15581495   | 6738     | 1.22     | 7.00      | -1.11 | 0.07  | 0.03   | 0.31                                                                                   | 0.47                                 | PLC1                           | phospholipase C, epsilon 1 | chr10          | protein_coding |
| ENSG00000138193.13 | 2.44771903 | 15581495   | 6738     | 1.22     | 7.00      | -1.11 | 0.07  | 0.03   | 0.31                                                                                   | 0.47                                 | PLC1                           | phospholipase C, epsilon 1 | chr10          | protein_coding |
| ENSG00000138193.13 | 2.44771903 | 15581495   | 6738     | 1.22     | 7.00      | -1.11 | 0.07  | 0.03   | 0.31                                                                                   | 0.47                                 | PLC1                           | phospholipase C, epsilon 1 | chr10          | protein_coding |
| ENSG00000138193.13 | 2.44771903 | 15581495   | 6738     | 1.22     | 7.00      | -1.11 | 0.07  | 0.03   | 0.31                                                                                   | 0.47                                 | PLC1                           | phospholipase C, epsilon 1 | chr10          | protein_coding |
| ENSG00000138193.13 | 2.44771903 | 15581495   | 6738     | 1.22     | 7.00      | -1.11 | 0.07  | 0.03   | 0.31                                                                                   | 0.47                                 | PLC1                           | phospholipase C, epsilon 1 | chr10          | protein_coding |
| ENSG00000138193.13 | 2.44771903 | 15581495   | 6738     | 1.22     | 7.00      | -1.11 | 0.07  | 0.03   | 0.31                                                                                   | 0.47                                 | PLC1                           | phospholipase C, epsilon 1 | chr10          | protein_coding |
| ENSG00000138193.13 | 2.44771903 | 15581495   | 6738     | 1.22     | 7.00      | -1.11 | 0.07  | 0.03   | 0.31                                                                                   | 0.47                                 | PLC1                           | phospholipase C, epsilon 1 | chr10          | protein_coding |
| ENSG00000138193.13 | 2.44771903 | 15581495   | 6738     | 1.22     | 7.00      | -1.11 | 0.07  | 0.03   | 0.31                                                                                   | 0.47                                 | PLC1                           | phospholipase C, epsilon 1 | chr10          | protein_coding |
| ENSG00000138193.13 | 2.44771903 | 15581495   | 6738     | 1.22     | 7.00      | -1.11 | 0.07  | 0.03   | 0.31                                                                                   | 0.47                                 | PLC1                           | phospholipase C, epsilon 1 | chr10          | protein_coding |
| ENSG00000138193.13 | 2.44771903 | 15581495   | 6738     | 1.22     | 7.00      | -1.11 | 0.07  | 0.03   | 0.31                                                                                   | 0.47                                 | PLC1                           | phospholipase C, epsilon 1 | chr10          | protein_coding |
| ENSG00000138193.13 | 2.44771903 | 15581495   | 6738     | 1.22     | 7.00      | -1.11 | 0.07  | 0.03   | 0.31                                                                                   | 0.47                                 | PLC1                           | phospholipase C, epsilon 1 | chr10          | protein_coding |
| ENSG00000138193.13 | 2.44771903 | 15581495   | 6738     | 1.22     | 7.00      | -1.11 | 0.07  | 0.03   | 0.31                                                                                   | 0.47                                 | PLC1                           | phospholipase C, epsilon 1 | chr10          | protein_coding |
| ENSG00000138193.13 | 2.44771903 | 15581495   | 6738     | 1.22     | 7.00      | -1.11 | 0.07  | 0.03   | 0.31                                                                                   | 0.47                                 | PLC1                           | phospholipase C, epsilon 1 | chr10          | protein_coding |
| ENSG00000138193.13 | 2.44771903 | 15581495   | 6738     | 1.22     | 7.00      | -1.11 | 0.07  | 0.03   | 0.31                                                                                   | 0.47                                 | PLC1                           | phospholipase C, epsilon 1 | chr10          | protein_coding |
| ENSG00000138193.13 | 2.44771903 | 15581495   | 6738     | 1.22     | 7.00      | -1.11 | 0.07  | 0.03   | 0.31                                                                                   | 0.47                                 | PLC1                           | phospholipase C, epsilon 1 | chr10          | protein_coding |
| ENSG00000138193.13 | 2.44771903 | 15581495   | 6738     | 1.22     | 7.00      | -1.11 | 0.07  | 0.03   | 0.31                                                                                   | 0.47                                 | PLC1                           | phospholipase C, epsilon 1 | chr10          | protein_coding |
| ENSG00000138193.13 | 2.44771903 | 15581495   | 6738     | 1.22     | 7.00      | -1.11 | 0.07  | 0.03   | 0.31                                                                                   | 0.47                                 | PLC1                           | phospholipase C, epsilon 1 | chr10          | protein_coding |
| ENSG00000138193.13 | 2.44771903 | 15581495   | 6738     | 1.22     | 7.00      | -1.11 | 0.07  | 0.03   | 0.31                                                                                   | 0.47                                 | PLC1                           | phospholipase C, epsilon 1 | chr10          | protein_coding |
| ENSG00000138193.13 | 2.44771903 | 15581495   | 6738     | 1.22     | 7.00      | -1.11 | 0.07  | 0.03   | 0.31                                                                                   | 0.47                                 | PLC1                           | phospholipase C, epsilon 1 | chr10          | protein_coding |
| ENSG00000138193.13 | 2.44771903 | 15581495   | 6738     | 1.22     | 7.00      | -1.11 | 0.07  | 0.03   | 0.31                                                                                   | 0.47                                 | PLC1                           | phospholipase C, epsilon 1 | chr10          | protein_coding |
| ENSG00000138193.13 | 2.44771903 | 15581495   | 6738     | 1.22     | 7.00      | -1.11 | 0.07  | 0.03   | 0.31                                                                                   | 0.47                                 | PLC1                           | phospholipase C, epsilon 1 | chr10          | protein_coding |
| ENSG00000138193.13 | 2.44771903 | 15581495   | 6738     | 1.22     | 7.00      | -1.11 | 0.07  | 0.03   | 0.31                                                                                   | 0.47                                 | PLC1                           | phospholipase C, epsilon 1 | chr10          | protein_coding |
| ENSG00000138193.13 | 2.44771903 | 15581495   | 6738     | 1.22     | 7.00      | -1.11 | 0.07  | 0.03   | 0.31                                                                                   | 0.47                                 | PLC1                           | phospholipase C, epsilon 1 | chr10          | protein_coding |
| ENSG00000138193.13 | 2.44771903 | 15581495   | 6738     | 1.22     | 7.00      | -1.11 | 0.07  | 0.03   | 0.31                                                                                   | 0.47                                 | PLC1                           | phospholipase C, epsilon 1 | chr10          | protein_coding |
| ENSG00000138193.13 | 2.44771903 | 15581495   | 6738     | 1.22     | 7.00      | -1.11 | 0.07  | 0.03   | 0.31                                                                                   | 0.47                                 | PLC1                           | phospholipase C, epsilon 1 | chr10          | protein_coding |
| ENSG00000138193.13 | 2.44771903 | 15581495   | 6738     | 1.22     | 7.00      | -1.11 | 0.07  | 0.03   | 0.31                                                                                   | 0.47                                 | PLC1                           | phospholipase C, epsilon 1 | chr10          | protein_coding |
| ENSG00000138193.13 | 2.44771903 | 15581495   | 6738     | 1.22     | 7.00      | -1.11 | 0.07  | 0.03   | 0.31                                                                                   | 0.47                                 | PLC1                           | phospholipase C, epsilon 1 | chr10          | protein_coding |
| ENSG00000138193.13 | 2.44771903 | 15581495   | 6738     | 1.22     | 7.00      | -1.11 | 0.07  | 0.03   | 0.31                                                                                   | 0.47                                 | PLC1                           | phospholipase C, epsilon 1 | chr10          | protein_coding |
| ENSG00000138193.13 | 2.44771903 | 15581495   | 6738     | 1.22     | 7.00      | -1.11 | 0.07  | 0.03   | 0.31                                                                                   | 0.47                                 | PLC1                           | phospholipase C, epsilon 1 | chr10          | protein_coding |
| ENSG00000138193.13 | 2.44771903 | 15581495   | 6738     | 1.22     | 7.00      | -1.11 | 0.07  | 0.03   | 0.31                                                                                   | 0.47                                 | PLC1                           | phospholipase C, epsilon 1 | chr10          | protein_coding |
| ENSG00000138193.13 | 2.44771903 | 15581495   | 6738     | 1.22     | 7.00      | -1.11 | 0.07  | 0.03   | 0.31                                                                                   | 0.47                                 | PLC1                           | phospholipase C, epsilon 1 | chr10          | protein_coding |
| ENSG00000138193.13 | 2.44771903 | 15581495   | 6738     | 1.22     | 7.00      | -1.11 | 0.07  | 0.03   | 0.31                                                                                   | 0.47                                 | PLC1                           | phospholipase C, epsilon 1 | chr10          | protein_coding |
| ENSG00000138193.13 | 2.44771903 | 15581495   | 6738     | 1.22     | 7.00      | -1.11 | 0.07  | 0.03   | 0.31                                                                                   | 0.47                                 | PLC1                           | phospholipase C, epsilon 1 | chr10          | protein_coding |
| ENSG00000138193.13 | 2.44771903 | 15581495   | 6738     | 1.22     | 7.00      | -1.11 | 0.07  | 0.03   | 0.31                                                                                   | 0.47                                 | PLC1                           | phospholipase C, epsilon 1 | chr10          | protein_coding |
| ENSG00000138193.13 | 2.44771903 | 15581495   | 6738     | 1.22     | 7.00      | -1.11 | 0.07  | 0.03   | 0.31                                                                                   | 0.47                                 | PLC1                           | phospholipase C, epsilon 1 | chr10          | protein_coding |
| ENSG00000138193.13 | 2.44771903 | 15581495   | 6738     | 1.22     | 7.00      | -1.11 | 0.07  | 0.03   | 0.31                                                                                   | 0.47                                 | PLC1                           | phospholipase C, epsilon 1 | chr10          | protein_coding |
| ENSG00000138193.13 | 2.44771903 | 15581495   | 6738     | 1.22     | 7.00      | -1.11 | 0.07  | 0.03   | 0.31                                                                                   | 0.47                                 | PLC1                           | phospholipase C, epsilon 1 | chr10          | protein_coding |
| ENSG00000138193.13 | 2.44771903 | 15581495   | 6738     | 1.22     | 7.00      | -1.11 | 0.07  | 0.03   | 0.31                                                                                   | 0.47                                 | PLC1                           | phospholipase C, epsilon 1 | chr10          | protein_coding |
| ENSG00000138193.13 | 2.44771903 | 15581495   | 6738     | 1.22     | 7.00      | -1.11 | 0.07  | 0.03   | 0.31                                                                                   | 0.47                                 | PLC1                           | phospholipase C, epsilon 1 | chr10          | protein_coding |
| ENSG00000138193.13 | 2.44771903 | 15581495   | 6738     | 1.22     | 7.00      | -1.11 | 0.07  | 0.03   | 0.31                                                                                   | 0.47                                 | PLC1                           | phospholipase C, epsilon 1 | chr10          | protein_coding |
| ENSG00000138193.13 | 2.44771903 | 15581495   | 6738     | 1.22     | 7.00      | -1.11 | 0.07  | 0.03   | 0.31                                                                                   | 0.47                                 | PLC1                           | phospholipase C, epsilon 1 | chr10          | protein_coding |
| ENSG00000138193.13 | 2.44771903 | 15581495   | 6738     | 1.22     | 7.00      | -1.11 | 0.07  | 0.03   | 0.31                                                                                   | 0.47                                 | PLC1                           | phospholipase C, epsilon 1 | chr10          | protein_coding |
| ENSG00000138193.13 | 2.44771903 | 15581495   | 6738     | 1.22     | 7.00      | -1.11 | 0.07  | 0.03   | 0.31                                                                                   | 0.47                                 | PLC1                           | phospholipase C, epsilon 1 | chr10          | protein_coding |
| ENSG00000138193.13 | 2.44771903 | 15581495   | 673      |          |           |       |       |        |                                                                                        |                                      |                                |                            |                |                |





|                  |           |            |           |            |        |        |        |         |             |       |                 |
|------------------|-----------|------------|-----------|------------|--------|--------|--------|---------|-------------|-------|-----------------|
| ENSG000002728531 | 1.2864719 | 1.106912   | 4422E-05  | 0.0019159  | 0.75   | 0.37   | 0.16   | 0.16    | RP11-398C1L | chr7  | lincRNA         |
| ENSG00000276434  | 1.1428202 | -0.2590193 | 0.0951434 | 0.02486403 | 0.79   | 1.11   | 2.52   | 0.31    | POLR22      | chr7  | protein, coding |
| ENSG00000276435  | 1.1428202 | 2.3822644  | 0.0951434 | 0.02486403 | 0.79   | 1.11   | 2.52   | 0.31    | LOC101927   | chr7  | protein, coding |
| ENSG00000276771  | 1.4964885 | 2.7087023  | 0.0015808 | 0.0004555  | 0.05   | 0.0    | 0.27   | 0.0     | RP11-123K3L | chr12 | antisense       |
| ENSG00000276781  | 1.2979785 | 3.0466667  | 2.11E-05  | 9.64E-05   | 1.02   | 1.61   | 0.81   | 4.75    | IFIT1       | chr1  | protein, coding |
| ENSG00000276782  | 1.1328262 | 1.5324949  | 0.0001153 | 0.0001153  | 0.02   | 0.0    | 0.35   | 1.24    | CHST15      | chr1  | protein, coding |
| ENSG00000276783  | 1.451263  | 7.8448042  | 5.59E-07  | 3.57E-06   | 108.71 | 117.09 | 56.5   | 53.38   | EXD4        | chr2  | protein, coding |
| ENSG00000276784  | 1.1398964 | 1.4837647  | 0.0003738 | 0.0012896  | 0.44   | 0.37   | 0.97   | 1.5     | LOC101927   | chr12 | protein, coding |
| ENSG00000276785  | 1.1442534 | 2.6991545  | 7.54E-05  | 0.0003153  | 0.01   | 0.0    | 0.35   | 0.88    | TP53I1      | chr12 | protein, coding |
| ENSG000002766901 | 1.6376954 | -1.986808  | 0.0196723 | 0.0467703  | 0.45   | 0.19   | 0.17   | 0.01    | RP11-727F1L | chr11 | antisense       |
| ENSG00000276691  | 1.3659342 | 1.2754306  | 4.29E-08  | 2.96E-07   | 0.04   | 0.12   | 0.0    | 0.01    | ADHL12      | chr12 | protein, coding |
| ENSG00000276692  | 1.3659342 | 1.2754306  | 4.29E-08  | 2.96E-07   | 0.04   | 0.12   | 0.0    | 0.01    | SNR343      | chr12 | protein, coding |
| ENSG00000276693  | 1.6382816 | 2.409113   | 8.67E-52  | 1.29E-49   | 1.39   | 1.58   | 0.03   | 0.02    | TRP2        | chr12 | protein, coding |
| ENSG00000276694  | 1.7083170 | 2.3339964  | 6.06E-06  | 5.83E-42   | 0.0    | 0.06   | 5.96   | 5.48    | CERS4       | chr19 | protein, coding |
| ENSG00000276695  | 1.5031924 | 1.8893537  | 7.7E-09   | 2.1E-05    | 0.39   | 0.39   | 0.39   | 0.83    | NR2P1       | chr19 | protein, coding |
| ENSG00000276696  | 1.0564572 | 2.9744209  | 0.0000055 | 0.02852742 | 0.0    | 0.14   | 0.0    | 0.24    | RP11-512M2L | chr12 | TEC             |
| ENSG00000276697  | 1.5989183 | 3.5547312  | 1.59E-05  | 1.59E-05   | 1.68   | 1.68   | 0.0    | 0.37    | FAM158A     | chr12 | protein, coding |
| ENSG00000276698  | 1.4174823 | 6.9254076  | 3.84E-47  | 4.55E-45   | 16.14  | 15.91  | 0.73   | 0.68    | GRB10       | chr7  | protein, coding |
| ENSG00000276699  | 1.0793229 | 4.0771732  | 0.0000024 | 0.00050242 | 0.34   | 3.27   | 9.1    | 6.84    | DTYRK1B     | chr19 | protein, coding |
| ENSG00000276700  | 1.7894339 | 1.7894339  | 1.43E-09  | 3.48E-07   | 4.26   | 3.17   | 1.87   | 1.1E-07 | PP1R35      | chr19 | protein, coding |
| ENSG00000276701  | 1.9345478 | 3.2550509  | 4.23E-10  | 3.91E-09   | 1.12   | 1.52   | 5.74   | 0.01    | TRM78       | chr19 | protein, coding |
| ENSG00000276702  | 1.1567872 | 1.6926611  | 0.0042556 | 0.0015086  | 2.74   | 1.79   | 1.8    | 1.92    | LM1         | chr11 | protein, coding |
| ENSG00000276703  | 1.5453575 | 1.5453575  | 1.43E-09  | 3.48E-07   | 4.26   | 3.17   | 1.87   | 1.1E-07 | PP1R35      | chr19 | protein, coding |
| ENSG00000276704  | 1.2125297 | 3.0135904  | 1.20E-11  | 1.34E-10   | 2.09   | 2.04   | 0.6    | 0.67    | AMIGO1      | chr1  | protein, coding |
| ENSG00000276705  | 1.2486742 | 1.0330773  | 8.33E-09  | 6.48E-08   | 0.19   | 0.14   | 0.05   | 1.25    | DNAJC24     | chr1  | protein, coding |
| ENSG00000276706  | 1.1596518 | 3.0565038  | 8.7E-07   | 0.0001153  | 0.13   | 0.17   | 0.29   | 1.53    | LOC101927   | chr11 | protein, coding |
| ENSG00000276707  | 1.8517074 | 1.8517074  | 9.22E-07  | 5.33E-06   | 0.52   | 0.61   | 1.86   | 3.99    | TCF32       | chr12 | protein, coding |
| ENSG00000276708  | 1.2158077 | 2.2623287  | 1.37E-13  | 1.88E-12   | 966.05 | 784.62 | 273.26 | 245.02  | PRDM5       | chr11 | protein, coding |
| ENSG00000276709  | 1.7845075 | 1.7845075  | 1.43E-09  | 3.48E-07   | 4.26   | 3.17   | 1.87   | 1.1E-07 | PP1R35      | chr19 | protein, coding |
| ENSG00000276710  | 1.5031924 | 1.8893537  | 7.7E-09   | 2.1E-05    | 0.39   | 0.39   | 0.39   | 0.83    | NR2P1       | chr19 | protein, coding |
| ENSG00000276711  | 1.7031907 | 2.2701022  | 0.0000002 | 0.0000002  | 0.0    | 0.0    | 0.0    | 0.0     | LOC101927   | chr12 | protein, coding |
| ENSG00000276712  | 1.5031924 | 1.8893537  | 7.7E-09   | 2.1E-05    | 0.39   | 0.39   | 0.39   | 0.83    | NR2P1       | chr19 | protein, coding |
| ENSG00000276713  | 1.5031924 | 1.8893537  | 7.7E-09   | 2.1E-05    | 0.39   | 0.39   | 0.39   | 0.83    | NR2P1       | chr19 | protein, coding |
| ENSG00000276714  | 1.5031924 | 1.8893537  | 7.7E-09   | 2.1E-05    | 0.39   | 0.39   | 0.39   | 0.83    | NR2P1       | chr19 | protein, coding |
| ENSG00000276715  | 1.5031924 | 1.8893537  | 7.7E-09   | 2.1E-05    | 0.39   | 0.39   | 0.39   | 0.83    | NR2P1       | chr19 | protein, coding |
| ENSG00000276716  | 1.5031924 | 1.8893537  | 7.7E-09   | 2.1E-05    | 0.39   | 0.39   | 0.39   | 0.83    | NR2P1       | chr19 | protein, coding |
| ENSG00000276717  | 1.5031924 | 1.8893537  | 7.7E-09   | 2.1E-05    | 0.39   | 0.39   | 0.39   | 0.83    | NR2P1       | chr19 | protein, coding |
| ENSG00000276718  | 1.5031924 | 1.8893537  | 7.7E-09   | 2.1E-05    | 0.39   | 0.39   | 0.39   | 0.83    | NR2P1       | chr19 | protein, coding |
| ENSG00000276719  | 1.5031924 | 1.8893537  | 7.7E-09   | 2.1E-05    | 0.39   | 0.39   | 0.39   | 0.83    | NR2P1       | chr19 | protein, coding |
| ENSG00000276720  | 1.5031924 | 1.8893537  | 7.7E-09   | 2.1E-05    | 0.39   | 0.39   | 0.39   | 0.83    | NR2P1       | chr19 | protein, coding |
| ENSG00000276721  | 1.5031924 | 1.8893537  | 7.7E-09   | 2.1E-05    | 0.39   | 0.39   | 0.39   | 0.83    | NR2P1       | chr19 | protein, coding |
| ENSG00000276722  | 1.5031924 | 1.8893537  | 7.7E-09   | 2.1E-05    | 0.39   | 0.39   | 0.39   | 0.83    | NR2P1       | chr19 | protein, coding |
| ENSG00000276723  | 1.5031924 | 1.8893537  | 7.7E-09   | 2.1E-05    | 0.39   | 0.39   | 0.39   | 0.83    | NR2P1       | chr19 | protein, coding |
| ENSG00000276724  | 1.5031924 | 1.8893537  | 7.7E-09   | 2.1E-05    | 0.39   | 0.39   | 0.39   | 0.83    | NR2P1       | chr19 | protein, coding |
| ENSG00000276725  | 1.5031924 | 1.8893537  | 7.7E-09   | 2.1E-05    | 0.39   | 0.39   | 0.39   | 0.83    | NR2P1       | chr19 | protein, coding |
| ENSG00000276726  | 1.5031924 | 1.8893537  | 7.7E-09   | 2.1E-05    | 0.39   | 0.39   | 0.39   | 0.83    | NR2P1       | chr19 | protein, coding |
| ENSG00000276727  | 1.5031924 | 1.8893537  | 7.7E-09   | 2.1E-05    | 0.39   | 0.39   | 0.39   | 0.83    | NR2P1       | chr19 | protein, coding |
| ENSG00000276728  | 1.5031924 | 1.8893537  | 7.7E-09   | 2.1E-05    | 0.39   | 0.39   | 0.39   | 0.83    | NR2P1       | chr19 | protein, coding |
| ENSG00000276729  | 1.5031924 | 1.8893537  | 7.7E-09   | 2.1E-05    | 0.39   | 0.39   | 0.39   | 0.83    | NR2P1       | chr19 | protein, coding |
| ENSG00000276730  | 1.5031924 | 1.8893537  | 7.7E-09   | 2.1E-05    | 0.39   | 0.39   | 0.39   | 0.83    | NR2P1       | chr19 | protein, coding |
| ENSG00000276731  | 1.5031924 | 1.8893537  | 7.7E-09   | 2.1E-05    | 0.39   | 0.39   | 0.39   | 0.83    | NR2P1       | chr19 | protein, coding |
| ENSG00000276732  | 1.5031924 | 1.8893537  | 7.7E-09   | 2.1E-05    | 0.39   | 0.39   | 0.39   | 0.83    | NR2P1       | chr19 | protein, coding |
| ENSG00000276733  | 1.5031924 | 1.8893537  | 7.7E-09   | 2.1E-05    | 0.39   | 0.39   | 0.39   | 0.83    | NR2P1       | chr19 | protein, coding |
| ENSG00000276734  | 1.5031924 | 1.8893537  | 7.7E-09   | 2.1E-05    | 0.39   | 0.39   | 0.39   | 0.83    | NR2P1       | chr19 | protein, coding |
| ENSG00000276735  | 1.5031924 | 1.8893537  | 7.7E-09   | 2.1E-05    | 0.39   | 0.39   | 0.39   | 0.83    | NR2P1       | chr19 | protein, coding |
| ENSG00000276736  | 1.5031924 | 1.8893537  | 7.7E-09   | 2.1E-05    | 0.39   | 0.39   | 0.39   | 0.83    | NR2P1       | chr19 | protein, coding |
| ENSG00000276737  | 1.5031924 | 1.8893537  | 7.7E-09   | 2.1E-05    | 0.39   | 0.39   | 0.39   | 0.83    | NR2P1       | chr19 | protein, coding |
| ENSG00000276738  | 1.5031924 | 1.8893537  | 7.7E-09   | 2.1E-05    | 0.39   | 0.39   | 0.39   | 0.83    | NR2P1       | chr19 | protein, coding |
| ENSG00000276739  | 1.5031924 | 1.8893537  | 7.7E-09   | 2.1E-05    | 0.39   | 0.39   | 0.39   | 0.83    | NR2P1       | chr19 | protein, coding |
| ENSG00000276740  | 1.5031924 | 1.8893537  | 7.7E-09   | 2.1E-05    | 0.39   | 0.39   | 0.39   | 0.83    | NR2P1       | chr19 | protein, coding |
| ENSG00000276741  | 1.5031924 | 1.8893537  | 7.7E-09   | 2.1E-05    | 0.39   | 0.39   | 0.39   | 0.83    | NR2P1       | chr19 | protein, coding |
| ENSG00000276742  | 1.5031924 | 1.8893537  | 7.7E-09   | 2.1E-05    | 0.39   | 0.39   | 0.39   | 0.83    | NR2P1       | chr19 | protein, coding |
| ENSG00000276743  | 1.5031924 | 1.8893537  | 7.7E-09   | 2.1E-05    | 0.39   | 0.39   | 0.39   | 0.83    | NR2P1       | chr19 | protein, coding |
| ENSG00000276744  | 1.5031924 | 1.8893537  | 7.7E-09   | 2.1E-05    | 0.39   | 0.39   | 0.39   | 0.83    | NR2P1       | chr19 | protein, coding |
| ENSG00000276745  | 1.5031924 | 1.8893537  | 7.7E-09   | 2.1E-05    | 0.39   | 0.39   | 0.39   | 0.83    | NR2P1       | chr19 | protein, coding |
| ENSG00000276746  | 1.5031924 | 1.8893537  | 7.7E-09   | 2.1E-05    | 0.39   | 0.39   | 0.39   | 0.83    | NR2P1       | chr19 | protein, coding |
| ENSG00000276747  | 1.5031924 | 1.8893537  | 7.7E-09   | 2.1E-05    | 0.39   | 0.39   | 0.39   | 0.83    | NR2P1       | chr19 | protein, coding |
| ENSG00000276748  | 1.5031924 | 1.8893537  | 7.7E-09   | 2.1E-05    | 0.39   | 0.39   | 0.39   | 0.83    | NR2P1       | chr19 | protein, coding |
| ENSG00000276749  | 1.5031924 | 1.8893537  | 7.7E-09   | 2.1E-05    | 0.39   | 0.39   | 0.39   | 0.83    | NR2P1       | chr19 | protein, coding |
| ENSG00000276750  | 1.5031924 | 1.8893537  | 7.7E-09   | 2.1E-05    | 0.39   | 0.39   | 0.39   | 0.83    | NR2P1       | chr19 | protein, coding |
| ENSG00000276751  | 1.5031924 | 1.8893537  | 7.7E-09   | 2.1E-05    | 0.39   | 0.39   | 0.39   | 0.83    | NR2P1       | chr19 | protein, coding |
| ENSG00000276752  | 1.5031924 | 1.8893537  | 7.7E-09   | 2.1E-05    | 0.39   | 0.39   | 0.39   | 0.83    | NR2P1       | chr19 | protein, coding |
| ENSG00000276753  | 1.5031924 | 1.8893537  | 7.7E-09   | 2.1E-05    | 0.39   | 0.39   | 0.39   | 0.83    | NR2P1       | chr19 | protein, coding |
| ENSG00000276754  | 1.5031924 | 1.8893537  | 7.7E-09   | 2.1E-05    | 0.39   | 0.39   | 0.39   | 0.83    | NR2P1       | chr19 | protein, coding |
| ENSG00000276755  | 1.5031924 | 1.8893537  | 7.7E-09   | 2.1E-05    | 0.39   | 0.39   | 0.39   | 0.83    | NR2P1       | chr19 | protein, coding |
| ENSG00000276756  | 1.5031924 | 1.8893537  | 7.7E-09   | 2.1E-05    | 0.39   | 0.39   | 0.39   | 0.83    | NR2P1       | chr19 | protein, coding |
| ENSG00000276757  | 1.5031924 | 1.8893537  | 7.7E-09   | 2.1E-05    | 0.39   | 0.39   | 0.39   | 0.83    | NR2P1       | chr19 | protein, coding |
| ENSG00000276758  | 1.5031924 | 1.8893537  | 7.7E-09   | 2.1E-05    | 0.39   | 0.39   | 0.39   | 0.83    | NR2P1       | chr19 | protein, coding |
| ENSG00000276759  | 1.5031924 | 1.8893537  | 7.7E-09   | 2.1E-05    | 0.39   | 0.39   | 0.39   | 0.83    | NR2P1       | chr19 | protein, coding |
| ENSG00000276760  | 1.5031924 | 1.8893537  | 7.7E-09   | 2.1E-05    | 0.39   | 0.39   | 0.39   | 0.83    | NR2P1       | chr19 | protein, coding |
| ENSG00000276761  | 1.5031924 | 1.8893537  | 7.7E-09   | 2.1E-05    | 0.39   | 0.39   | 0.39   | 0.83    | NR2P1       | chr19 | protein, coding |
| ENSG00000276762  | 1.5031924 | 1.8893537  | 7.7E-09   | 2.1E-05    | 0.39   | 0.39   | 0.39   | 0.83    | NR2P1       | chr19 | protein, coding |
| ENSG00000276763  | 1.5031924 | 1.8893537  | 7.7E-09   | 2.1E-05    | 0.39   | 0.39   | 0.39   | 0.83    | NR2P1       | chr19 | protein, coding |
| ENSG00000276764  | 1.5031924 | 1.8893537  | 7.7E-09   | 2.1E-05    | 0.39   | 0.39   | 0.39   | 0.83    | NR2P1       | chr19 | protein, coding |
| ENSG00000276765  | 1.5031924 | 1.8893537  | 7.7E-09   | 2.1E-05    | 0.39   | 0.39   | 0.39   | 0.83    | NR2P1       | chr19 | protein, coding |
| ENSG00000276766  | 1.5031924 | 1.8893537  | 7.7E-09   | 2.1E-05    | 0.39   | 0.39   | 0.39   | 0.83    | NR2P1       | chr19 | protein, coding |
| ENSG00000276767  | 1.5031924 | 1.8893537  | 7.7E-09   | 2.1E-05    | 0.39   | 0.39   | 0.39   | 0.83    | NR2P1       | chr19 | protein, coding |
| ENSG00000276768  | 1.5031924 | 1.8893537  | 7.7E-09   | 2.1E-05    | 0.39   | 0.39   | 0.39   | 0.83    | NR2P1       | chr19 | protein, coding |
| ENSG00000276769  | 1.5031924 | 1.8893537  | 7.7E-09   | 2.1E-05    | 0.39   | 0.39   | 0.39   | 0.83    | NR2P1       | chr19 | protein, coding |
| ENSG00000276770  | 1.5031924 | 1.8893537  | 7.7E-09   | 2.1E-05    | 0.39   | 0.39   | 0.39   | 0.83    | NR2P1       | chr19 | protein, coding |
| ENSG00000276771  | 1.5031924 | 1.8893537  | 7.7E-09   | 2.1E-05    | 0.39   | 0.39   | 0.39   | 0.83    | NR2P1       | chr19 |                 |

|                    |            |            |           |             |        |        |        |                     |                                                                                |                                              |                      |                |
|--------------------|------------|------------|-----------|-------------|--------|--------|--------|---------------------|--------------------------------------------------------------------------------|----------------------------------------------|----------------------|----------------|
| ENSG00000159230.10 | 1771333.00 | 0.33193065 | 1.77E-05  | 8.19E-05    | 0.09   | 0.24   | 0.93   | 0.48 C20orf81       | chromosome 2 open reading frame 81                                             | chr2                                         | protein_coding       |                |
| ENSG00000175562.10 | 4638496.1  | 0.97234049 | 1.45E-25  | 5.23E-24    | 0.05   | 0.07   | 1.13   | 149 KDEMBA          | lysine (K)-specific dipeptide 6A                                               | chr1                                         | protein_coding       |                |
| ENSG00000134215.14 | 2.7660081  | -0.394231  | 4.67E-08  | 3.27E-07    | 0.05   | 0      | 0.17   | 322 VAV2            | vasp 3 guanine nucleotide exchange factor                                      | chr1                                         | protein_coding       |                |
| ENSG00000175401.14 | 1.6600000  | 0.984014   | 6.72E-13  | 1.63E-13    | 0.05   | 0.06   | 1.33   | ENSG00000175401.14  | solute carrier family 25 (mitochondrial carrier; phosphate carrier), member 24 | chr1                                         | protein_coding       |                |
| ENSG00000174788.1  | 51178241   | -0.831066  | 3.67E-21  | 9.93E-20    | 0.13   | 0.14   | 0.41   | 464 PCP2            | Purkinje cell protein 2                                                        | chr1                                         | protein_coding       |                |
| ENSG0000014988.18  | 1.3872527  | 0.952682   | 1.75E-06  | 9.70E-06    | 0.061  | 0.99   | 5.65   | 477 KNGA3           | NAD(P)H dehydrogenase, quinone 2                                               | chr1                                         | protein_coding       |                |
| ENSG00000137174.12 | 1.44445    | 1.74E-24   | 1.93E-14  | 2.03E-13    | 0.38   | 0.91   | 2.03   | ENSG00000137174.12  | ENSG00000137174.12                                                             | chr1                                         | protein_coding       |                |
| ENSG00000183628.18 | 34716346   | 0.98947198 | 1.25E-16  | 2.31E-15    | 0      | 0.17   | 1.36   | 105 NKG6-1          | NKG6 homolog                                                                   | chr4                                         | protein_coding       |                |
| ENSG00000148939.10 | 1.4893909  | 0.98808    | 0.0000000 | 0.0000000   | 0      | 0.00   | 0.00   | ENSG00000148939.10  | ENSG00000148939.10                                                             | chr2                                         | protein_coding       |                |
| ENSG00000185676.3  | 1.5789523  | 1.1594838  | 6.02E-06  | 0.0045E-05  | 0.24   | 0.36   | 1.21   | 115 ARC             | kinase suppressor of ras 2                                                     | chr2                                         | protein_coding       |                |
| ENSG00000186266.15 | 1.0030615  | 1.4615942  | 0.0029964 | 0.0030954   | 0.22   | 0.22   | 0.4    | 472 CXOR18          | CXOR18 cytochrome c oxidase assembly factor                                    | chr2                                         | protein_coding       |                |
| ENSG00000163549.9  | 6.35449    | 0.983408   | 1.15E-13  | 1.15E-13    | 1.23   | 1.23   | 1.23   | 153 TNFSF10         | tumor necrosis factor (ligand) superfamily, member 10                          | chr1                                         | protein_coding       |                |
| ENSG0000000432.14  | 1.0820725  | 0.4013749  | 0.0000000 | 0.00000713  | 0.85   | 0.74   | 2.5    | 197 MAPK9           | mitogen-activated protein kinase kinase 9                                      | chr14                                        | protein_coding       |                |
| ENSG00000110002.14 | 1.5815374  | 2.0285445  | 1.55E-37  | 1.03E-35    | 1.17   | 0.95   | 0.05   | 0                   | WMA50                                                                          | von Willebrand factor A domain containing 5A | chr11                | protein_coding |
| ENSG000001245.11   | 1.3856324  | 1.345656   | 1.55E-17  | 1.77E-17    | 1.44   | 1.44   | 1.44   | 54E-08              | transcriptase repeat domain 39C                                                | chr18                                        | protein_coding       |                |
| ENSG0000019620.11  | 1.0380215  | 1.0120362  | 0.0012527 | 0.000000857 | 403.65 | 372.68 | 254.79 | 23163 TUBB          | tubulin, beta class I                                                          | chr7                                         | protein_coding       |                |
| ENSG00000218695.7  | 2.1079474  | 1.7662845  | 5.72E-09  | 4.55E-08    | 0.54   | 0.59   | 1.85   | 328 AC90M0402       | AC90M0402                                                                      | chr1                                         | antisense            |                |
| ENSG000001744.3    | 1.0020381  | 0.983784   | 1.30E-16  | 6.89E-10    | 0.33   | 0.02   | 0.91   | 0.02 RNAI           | ribonuclease H-methyltransferase                                               | chr17                                        | protein_coding       |                |
| ENSG0000021261.36  | 1.6223439  | -0.256136  | 1.50E-12  | 1.86E-11    | 0.52   | 0.42   | 0.07   | 0.03 RNAI           | plasmogen activator, urokinase                                                 | chr10                                        | protein_coding       |                |
| ENSG00000117262.17 | 1.5686359  | 2.0193218  | 1.01E-06  | 8.26E-09    | 0.97   | 0.66   | 2.96   | 353 GPR89A          | G protein-coupled receptor 89A                                                 | chr1                                         | protein_coding       |                |
| ENSG000001751.9    | 1.620319   | 2.6763765  | 0.0012528 | 0.0000442   | 4.34   | 4.46   | 13.69  | 446 GPR89A          | G protein-coupled receptor 89A                                                 | chr1                                         | protein_coding       |                |
| ENSG00000212467.1  | 1.4219422  | 0.4802459  | 2.55E-17  | 4.95E-16    | 0      | 0.39   | 4.53   | 445 RPI1-SD22P1-1   | RPI1-SD22P1-1                                                                  | chr1                                         | lncRNA               |                |
| ENSG00000120888.14 | 1.0020888  | 1.4617656  | 0.0000000 | 0.0000000   | 0.51   | 0.51   | 0.51   | 11002 RPI1-SD22P1-1 | RPI1-SD22P1-1                                                                  | chr1                                         | protein_coding       |                |
| ENSG00000141614.14 | 2.0098208  | 3.7373761  | 5.38E-11  | 5.54E-10    | 1.11   | 1.23   | 4.65   | 798 DCDC4           | DBD1 and CUL4-associated factor 6                                              | chr1                                         | protein_coding       |                |
| ENSG00000241472.5  | 1.0521713  | -1.2215183 | 1.71E-09  | 5.62E-08    | 0      | 0.01   | 0.13   | 0.23 PTFR9-AS1      | PTFR9 antisense RNA 1                                                          | chr1                                         | processed_transcript |                |
| ENSG0000014444.13  | 1.3389896  | 0.916752   | 7.04E-06  | 1.31E-07    | 826.2  | 412.37 | 1.02   | 454 CTRP2           | ribosomal protein L13                                                          | chr15                                        | protein_coding       |                |
| ENSG00000189047.5  | 1.8323354  | 1.581117   | 1.78E-09  | 1.51E-08    | 1.36   | 1.65   | 0.52   | 0.61 RSL1           | insulin receptor subunit alpha                                                 | chr2                                         | protein_coding       |                |
| ENSG00000267424.1  | 5.8224587  | 0.7831928  | 8.99E-28  | 7.27E-26    | 4.34   | 2.8    | 0      | 0.15 CD-226SG       | CD-226SG                                                                       | chr19                                        | antisense            |                |
| ENSG000001735.17   | 1.3653782  | 1.4591235  | 1.33E-13  | 1.25E-12    | 2.54   | 2.54   | 2.54   | 122 CDM4            | CD4 molecule, complement regulatory protein                                    | chr1                                         | protein_coding       |                |
| ENSG00000196748.1  | 5.2526039  | -0.883398  | 0.0038165 | 0.0148881   | -0.5   | 0      | 0.46   | 0.17 CULP2          | zinc finger protein 2                                                          | chr1                                         | protein_coding       |                |
| ENSG00000210024.3  | 3.3242308  | -1.076123  | 3.64E-07  | 2.26E-06    | 0.03   | 0.31   | 0.63   | 0.06 ZNF670         | zinc finger protein 670                                                        | chr10                                        | protein_coding       |                |
| ENSG00000192919.12 | 3.4676979  | 0.794707   | 1.25E-07  | 2.22E-06    | 5.74   | 5.87   | 0.09   | 0.82 PHLDAL         | pleckstrin homology-like domain, family A, member 1                            | chr12                                        | protein_coding       |                |
| ENSG00000192919.12 | 3.4676979  | 0.794707   | 1.25E-07  | 2.22E-06    | 5.74   | 5.87   | 0.09   | 0.02 CDM4           | CD4 molecule, complement regulatory protein                                    | chr1                                         | protein_coding       |                |
| ENSG00000192919.12 | 3.4676979  | 0.794707   | 1.25E-07  | 2.22E-06    | 5.74   | 5.87   | 0.09   | 0.02 CDM4           | CD4 molecule, complement regulatory protein                                    | chr1                                         | protein_coding       |                |
| ENSG00000192919.12 | 3.4676979  | 0.794707   | 1.25E-07  | 2.22E-06    | 5.74   | 5.87   | 0.09   | 0.02 CDM4           | CD4 molecule, complement regulatory protein                                    | chr1                                         | protein_coding       |                |
| ENSG00000192919.12 | 3.4676979  | 0.794707   | 1.25E-07  | 2.22E-06    | 5.74   | 5.87   | 0.09   | 0.02 CDM4           | CD4 molecule, complement regulatory protein                                    | chr1                                         | protein_coding       |                |
| ENSG00000192919.12 | 3.4676979  | 0.794707   | 1.25E-07  | 2.22E-06    | 5.74   | 5.87   | 0.09   | 0.02 CDM4           | CD4 molecule, complement regulatory protein                                    | chr1                                         | protein_coding       |                |
| ENSG00000192919.12 | 3.4676979  | 0.794707   | 1.25E-07  | 2.22E-06    | 5.74   | 5.87   | 0.09   | 0.02 CDM4           | CD4 molecule, complement regulatory protein                                    | chr1                                         | protein_coding       |                |
| ENSG00000192919.12 | 3.4676979  | 0.794707   | 1.25E-07  | 2.22E-06    | 5.74   | 5.87   | 0.09   | 0.02 CDM4           | CD4 molecule, complement regulatory protein                                    | chr1                                         | protein_coding       |                |
| ENSG00000192919.12 | 3.4676979  | 0.794707   | 1.25E-07  | 2.22E-06    | 5.74   | 5.87   | 0.09   | 0.02 CDM4           | CD4 molecule, complement regulatory protein                                    | chr1                                         | protein_coding       |                |
| ENSG00000192919.12 | 3.4676979  | 0.794707   | 1.25E-07  | 2.22E-06    | 5.74   | 5.87   | 0.09   | 0.02 CDM4           | CD4 molecule, complement regulatory protein                                    | chr1                                         | protein_coding       |                |
| ENSG00000192919.12 | 3.4676979  | 0.794707   | 1.25E-07  | 2.22E-06    | 5.74   | 5.87   | 0.09   | 0.02 CDM4           | CD4 molecule, complement regulatory protein                                    | chr1                                         | protein_coding       |                |
| ENSG00000192919.12 | 3.4676979  | 0.794707   | 1.25E-07  | 2.22E-06    | 5.74   | 5.87   | 0.09   | 0.02 CDM4           | CD4 molecule, complement regulatory protein                                    | chr1                                         | protein_coding       |                |
| ENSG00000192919.12 | 3.4676979  | 0.794707   | 1.25E-07  | 2.22E-06    | 5.74   | 5.87   | 0.09   | 0.02 CDM4           | CD4 molecule, complement regulatory protein                                    | chr1                                         | protein_coding       |                |
| ENSG00000192919.12 | 3.4676979  | 0.794707   | 1.25E-07  | 2.22E-06    | 5.74   | 5.87   | 0.09   | 0.02 CDM4           | CD4 molecule, complement regulatory protein                                    | chr1                                         | protein_coding       |                |
| ENSG00000192919.12 | 3.4676979  | 0.794707   | 1.25E-07  | 2.22E-06    | 5.74   | 5.87   | 0.09   | 0.02 CDM4           | CD4 molecule, complement regulatory protein                                    | chr1                                         | protein_coding       |                |
| ENSG00000192919.12 | 3.4676979  | 0.794707   | 1.25E-07  | 2.22E-06    | 5.74   | 5.87   | 0.09   | 0.02 CDM4           | CD4 molecule, complement regulatory protein                                    | chr1                                         | protein_coding       |                |
| ENSG00000192919.12 | 3.4676979  | 0.794707   | 1.25E-07  | 2.22E-06    | 5.74   | 5.87   | 0.09   | 0.02 CDM4           | CD4 molecule, complement regulatory protein                                    | chr1                                         | protein_coding       |                |
| ENSG00000192919.12 | 3.4676979  | 0.794707   | 1.25E-07  | 2.22E-06    | 5.74   | 5.87   | 0.09   | 0.02 CDM4           | CD4 molecule, complement regulatory protein                                    | chr1                                         | protein_coding       |                |
| ENSG00000192919.12 | 3.4676979  | 0.794707   | 1.25E-07  | 2.22E-06    | 5.74   | 5.87   | 0.09   | 0.02 CDM4           | CD4 molecule, complement regulatory protein                                    | chr1                                         | protein_coding       |                |
| ENSG00000192919.12 | 3.4676979  | 0.794707   | 1.25E-07  | 2.22E-06    | 5.74   | 5.87   | 0.09   | 0.02 CDM4           | CD4 molecule, complement regulatory protein                                    | chr1                                         | protein_coding       |                |
| ENSG00000192919.12 | 3.4676979  | 0.794707   | 1.25E-07  | 2.22E-06    | 5.74   | 5.87   | 0.09   | 0.02 CDM4           | CD4 molecule, complement regulatory protein                                    | chr1                                         | protein_coding       |                |
| ENSG00000192919.12 | 3.4676979  | 0.794707   | 1.25E-07  | 2.22E-06    | 5.74   | 5.87   | 0.09   | 0.02 CDM4           | CD4 molecule, complement regulatory protein                                    | chr1                                         | protein_coding       |                |
| ENSG00000192919.12 | 3.4676979  | 0.794707   | 1.25E-07  | 2.22E-06    | 5.74   | 5.87   | 0.09   | 0.02 CDM4           | CD4 molecule, complement regulatory protein                                    | chr1                                         | protein_coding       |                |
| ENSG00000192919.12 | 3.4676979  | 0.794707   | 1.25E-07  | 2.22E-06    | 5.74   | 5.87   | 0.09   | 0.02 CDM4           | CD4 molecule, complement regulatory protein                                    | chr1                                         | protein_coding       |                |
| ENSG00000192919.12 | 3.4676979  | 0.794707   | 1.25E-07  | 2.22E-06    | 5.74   | 5.87   | 0.09   | 0.02 CDM4           | CD4 molecule, complement regulatory protein                                    | chr1                                         | protein_coding       |                |
| ENSG00000192919.12 | 3.4676979  | 0.794707   | 1.25E-07  | 2.22E-06    | 5.74   | 5.87   | 0.09   | 0.02 CDM4           | CD4 molecule, complement regulatory protein                                    | chr1                                         | protein_coding       |                |
| ENSG00000192919.12 | 3.4676979  | 0.794707   | 1.25E-07  | 2.22E-06    | 5.74   | 5.87   | 0.09   | 0.02 CDM4           | CD4 molecule, complement regulatory protein                                    | chr1                                         | protein_coding       |                |
| ENSG00000192919.12 | 3.4676979  | 0.794707   | 1.25E-07  | 2.22E-06    | 5.74   | 5.87   | 0.09   | 0.02 CDM4           | CD4 molecule, complement regulatory protein                                    | chr1                                         | protein_coding       |                |
| ENSG00000192919.12 | 3.4676979  | 0.794707   | 1.25E-07  | 2.22E-06    | 5.74   | 5.87   | 0.09   | 0.02 CDM4           | CD4 molecule, complement regulatory protein                                    | chr1                                         | protein_coding       |                |
| ENSG00000192919.12 | 3.4676979  | 0.794707   | 1.25E-07  | 2.22E-06    | 5.74   | 5.87   | 0.09   | 0.02 CDM4           | CD4 molecule, complement regulatory                                            |                                              |                      |                |

|                    |            |            |            |            |        |        |        |       |                 |                                                                                                         |                      |                      |           |
|--------------------|------------|------------|------------|------------|--------|--------|--------|-------|-----------------|---------------------------------------------------------------------------------------------------------|----------------------|----------------------|-----------|
| ENSG00000236081.1  | -3170931   | 392371532  | 7846-23    | 231E-21    | 32.16  | 37.33  | 6.74   | 351   | ELF1N-AS1       | ELF1 antisense RNA 1                                                                                    | dhv7                 | lncRNA               |           |
| ENSG00000212704.1  | -15203892  | 0.42499    |            |            | 0.71   | 0.48   | 0.13   | 115   | TMC21-AS1       | TMC21 antisense RNA 1 (head to head)                                                                    | dhv7                 | antisense            |           |
| ENSG00000165434.7  | 16709748   | -0.269354  | 0.0002232  | 0.00083364 | 0.02   | 0.04   | 0.14   | 0.13  | PGM2L1          | phosphoglucomutase 2-like 1                                                                             | dhv11                | protein_coding       |           |
| ENSG00000186199.9  | 344522375  | -1320469   | 1.32E-06   | 7.43E-06   | 0      | 0.02   | 0.02   | 0.04  | NUM2B           | NUM family member 2B                                                                                    | dhv10                | protein_coding       |           |
| ENSG00000117425.12 | 1030002    | -0.984648  | 0.0001502  | 0.0001502  | 0.00   | 0.00   | 0.00   | 0.17  | PTC42           |                                                                                                         | dhv10                | protein_coding       |           |
| ENSG00000156025.9  | 102412814  | 21490306   | 0.0012023  | 0.00389847 | 0.27   | 0.44   | 0.22   | 121   | GNAQ            | guanine nucleotide binding protein (G protein), q polypeptide                                           | dhv9                 | protein_coding       |           |
| ENSG000001397015   | 28998835   | 339658944  | 731E-20    | 1.74E-18   | 0.83   | 0.67   | 1.74   | 762   | RTN1            | reticulon 1                                                                                             | dhv14                | protein_coding       |           |
| ENSG00000143288.11 | 21303925   | 144102108  | 487E-11    | 5.06E-10   | 0.48   | 0.48   | 0.41   | 396   | NUF2            | NUF2, NDC80 kinetochore complex component                                                               | dhv1                 | protein_coding       |           |
| ENSG00000189449.9  | 18701748   | 28577972   | 375E-06    | 1.97E-05   | 0.08   | 0.11   | 0.45   | 0.51  | C11orf63        | chromosome 11 open reading frame 63                                                                     | dhv11                | protein_coding       |           |
| ENSG00000105332.10 | 206380176  | -0.4830794 | 1.59E-05   | 7.44E-05   | 0.01   | 0.18   | 0.2    | 0.85  | CGRRF1          | cell growth regulator with ring finger domain 1                                                         | dhv14                | protein_coding       |           |
| ENSG00000197942.9  | 45818636   | 4.619366   | 4.87E-08   | 2.66E-07   | 0.17   | 0.23   | 6.39   | 834   | PRR             | prim (iron-binding) nuclear protein                                                                     | dhv12                | protein_coding       |           |
| ENSG00000136478.6  | 114606999  | 412811235  | 0.0010239  | 0.0004167  | 1.33   | 1.89   | 4.14   | 537   | TXD2            | testis expressed 2                                                                                      | dhv17                | protein_coding       |           |
| ENSG0000025893.9   | 23201767   | -2.482637  | 0.019235   | 0.0408385  | 0.04   | 0.09   | 0.19   | 0.19  | RPLP25          | RPLS antisense                                                                                          | dhv17                | protein_coding       |           |
| ENSG0000012875.12  | 15135565   | 49532019   | 2.63E-07   | 1.65E-06   | 2.78   | 3.03   | 1156   | 1051  | TBC1D20         | TBC1 domain family, member 20                                                                           | dhv20                | protein_coding       |           |
| ENSG00000196440.10 | -2.210012  | -0.5835166 | 4.10E-06   | 2.14E-05   | 0.11   | 0.11   | 0.05   | 0.01  | ARMCA4          | armadillo repeat containing, X-linked 4                                                                 | dhvX                 | protein_coding       |           |
| ENSG00000164807.12 | 21582935   | 146045296  | 7.84E-07   | 3.93E-06   | 0.2    | 0.47   | 1.8    | 329   | MCU2            | mitochondrial calcium uptake 2                                                                          | dhv13                | protein_coding       |           |
| ENSG00000273565.1  | 234586639  | -0.964725  | 5.34E-05   | 0.0002654  | 0.16   | 0.29   | 1.5    | 1.61  | CTD-3075F1      | --                                                                                                      | dhv14                | lncRNA               |           |
| ENSG0000050267.19  | 34876646   | 22462474   | 4.96E-22   | 1.39E-20   | 0.03   | 0.16   | 0.87   | 2.01  | ARID4B          | AT rich interactive domain 4B (BRP1-like)                                                               | dhv1                 | protein_coding       |           |
| ENSG00000122078.1  | -6.4252012 | -1.9700183 | 7.24E-07   | 1.42E-06   | 2.38   | 1.99   | 0      | 0     | CTA-3840F1      | --                                                                                                      | dhv22                | antisense            |           |
| ENSG00000228673.1  | 290879791  | -1.4003822 | 2.09E-05   | 9.56E-05   | 0.08   | 0.08   | 0.08   | 1.01  | 0.73            | OGFR-AS1                                                                                                | OGFR antisense RNA 1 | dhv20                | antisense |
| ENSG00000106462.9  | 133349861  | 424234572  | 6.22E-06   | 3.14E-05   | 2.69   | 3.74   | 10.41  | 11.16 | LZHU            | enhancer of zeste 2 polycomb repressive complex 2 subunit                                               | dhv2                 | protein_coding       |           |
| ENSG00000274931.1  | 1.5841432  | -0.0271385 | 8.47E-21   | 2.16E-19   | 0.52   | 0.81   | 0.03   | 0     | AC020629.3      | --                                                                                                      | dhv2                 | lncRNA               |           |
| ENSG00000278777.1  | -3.1030297 | -1.661445  | 8.20E-06   | 4.05E-05   | 0.11   | 0.11   | 0      | 0.03  | AC00403.4       | --                                                                                                      | dhv13                | lncRNA               |           |
| ENSG00000197568.9  | 1.767963   | 929001695  | 1.46E-09   | 1.25E-08   | 198.11 | 147.42 | 68.55  | 68.86 | RPL37A          | ribosomal protein L37a                                                                                  | dhv2                 | protein_coding       |           |
| ENSG000001308118   | 13539357   | 377767331  | 6.04E-06   | 3.09E-05   | 1.29   | 1.33   | 0.66   | 5.61  | TRC101          | T-cell protein 1                                                                                        | dhv2                 | protein_coding       |           |
| ENSG00000257913.2  | 126467402  | 156577176  | 0.0004951  | 0.00057808 | 0.47   | 0.76   | 2.15   | 1.76  | RPI1-386G1      | --                                                                                                      | dhv12                | antisense            |           |
| ENSG0000015782.15  | 1.96243732 | 164222564  | 2.68E-06   | 1.45E-05   | 0.17   | 0.18   | 0.66   | 0.71  | PANK1           | panthothenate kinase 1                                                                                  | dhv10                | protein_coding       |           |
| ENSG0000078237.5   | 163091831  | 242506461  | 2.90E-07   | 1.82E-06   | 0.66   | 0.84   | 2.42   | 379   | CLIC5r5         | --                                                                                                      | dhv12                | protein_coding       |           |
| ENSG00000267368.1  | 247831779  | 378152521  | 2.28E-15   | 3.77E-14   | 2.69   | 3.22   | 20.89  | 16.17 | UPK3BL          | uroplakin 3B-like                                                                                       | dhv7                 | protein_coding       |           |
| ENSG0000021955.9   | -1.5201408 | 138675375  | 7.28E-07   | 3.96E-06   | 0.01   | 0.17   | 0.18   | 0.27  | SLC22A8         | solute carrier family 22, member 8                                                                      | dhv13                | protein_coding       |           |
| ENSG00000139921.11 | 222048982  | 228327386  | 1.48E-11   | 1.63E-10   | 0.42   | 0.26   | 1.24   | 0.32  | TMC1            | thionin-induced related transmembrane protein 1                                                         | dhv14                | protein_coding       |           |
| ENSG0000014324.14  | -2.145779  | 168202142  | 2.48E-10   | 2.33E-09   | 1.88   | 2.46   | 0.56   | 0.74  | CPO             | carboxypeptidase 0                                                                                      | dhv2                 | protein_coding       |           |
| ENSG00000176157.1  | 0.1761371  | 2.9671719  | 0.0014849  | 0.00075643 | 0.07   | 0.07   | 0.1    | 0     | THNF311B        | tumor necrosis factor receptor superfamily, member 11b                                                  | dhv10                | protein_coding       |           |
| ENSG00000176122.1  | -7.3004049 | -15796114  | 1.11E-09   | 9.61E-09   | 0.31   | 0.15   | 0      | 0     | RPI1-143E21     | --                                                                                                      | dhv12                | lncRNA               |           |
| ENSG00000188946.5  | 1.6802374  | -1.5819575 | 7.91E-07   | 6.07E-07   | 0.08   | 0.1    | 0      | 0     | TOX             | thyroxine selection-associated high mobility group box                                                  | dhv12                | protein_coding       |           |
| ENSG00000240032.1  | 435006931  | -3.05493   | 0.010495   | 0.0256242  | 0      | 0      | 0.36   | 0     | RPI1-274H2      | --                                                                                                      | dhv12                | antisense            |           |
| ENSG0000015954.10  | 11632383   | 26061027   | 1.80E-55   | 3.51E-53   | 4.11   | 3.76   | 0      | 0     | FOXJ            | pancreatic and duodenal homeobox 1                                                                      | dhv13                | protein_coding       |           |
| ENSG00000107954.10 | 1.8052809  | 272027309  | 7.80E-06   | 3.87E-05   | 0.54   | 0.55   | 1.79   | 11.73 | ATP10D          | ATPase, H <sup>+</sup> transporting, lysosomal 34kDa, V1 subunit D                                      | dhv14                | protein_coding       |           |
| ENSG00000153201.14 | 30362626   | 312545672  | 3.91E-20   | 9.50E-19   | 0.13   | 0.13   | 0.03   | 2     | RNF168          | ring finger protein 168, E3 ubiquitin protein ligase                                                    | dhv2                 | protein_coding       |           |
| ENSG0000016836.14  | 1.4043203  | 162931669  | 2.34E-06   | 6.18E-06   | 0.4    | 0.4    | 1.51   | 1.75  | BTBD49          | BTBD domain family, member 49                                                                           | dhv2                 | protein_coding       |           |
| ENSG00000232628.4  | 5.5745548  | -1.673241  | 0.0008564  | 0.00281128 | 0      | 0      | 0.2    | 0.28  | RPI1-365O1      | --                                                                                                      | dhv12                | sense_intronic       |           |
| ENSG0000015428.11  | 188411786  | -1.863221  | 0.0138129  | 0.03443739 | 0.04   | 0.06   | 0.17   | 0.33  | TRMT4           | tripartite motif containing 74                                                                          | dhv1                 | protein_coding       |           |
| ENSG0000015428.11  | 1.6007319  | -2.9671719 | 0.0014849  | 0.00075643 | 0.07   | 0.07   | 0.1    | 1.75  | PRKR            | protein kinase, mitogen-activated double stranded RNA dependent inhibitor, repressor of (PSB repressor) | dhv11                | protein_coding       |           |
| ENSG00000134849.9  | 352918945  | -1.2512508 | 6.12E-07   | 3.65E-06   | 0.02   | 0      | 0.19   | 0.18  | TMEM169         | transmembrane protein 169                                                                               | dhv2                 | protein_coding       |           |
| ENSG00000231198.3  | -1.3159981 | 0.4023626  | 1.45E-13   | 1.98E-12   | 1.07   | 1.04   | 0.18   | 0.14  | RNF224          | ring finger protein 224                                                                                 | dhv9                 | protein_coding       |           |
| ENSG000001368115   | 1.613818   | 749486262  | 6.95E-08   | 2.07E-07   | 45.73  | 50.18  | 20.58  | 20.58 | COP2            | outer domain fiber of sperm tails 2                                                                     | dhv2                 | protein_coding       |           |
| ENSG00000249693.2  | 37108418   | -2.2323147 | 0.0002349  | 0.00087473 | 0.02   | 0      | 0.08   | 0.26  | THEGL           | the spermato protein                                                                                    | dhv2                 | protein_coding       |           |
| ENSG0000026694.11  | 1.1521542  | 1.4107303  | 1.33E-06   | 6.18E-05   | 0.4    | 0.4    | 0.64   | 0.14  | THARP1D         | THARP domain family, member 1                                                                           | dhv16                | protein_coding       |           |
| ENSG00000114628.16 | 1.6359223  | 57311231   | 2.65E-08   | 1.91E-07   | 31.05  | 26.7   | 1327   | 1155  | ABTB1           | ankyrin repeat and BTB (POZ) domain containing 1                                                        | dhv2                 | protein_coding       |           |
| ENSG00000139218.16 | 282013651  | 329625108  | 3.42E-18   | 7.14E-17   | 0.13   | 0.22   | 127    | 1.99  | SCAF11          | SR-related CTD-associated factor 11                                                                     | dhv12                | protein_coding       |           |
| ENSG0000019526.1   | 71887271   | -2.1832862 | 0.0023419  | 0.00087473 | 0.02   | 0.04   | 1.43   | 2.85  | SCN6A60         | sodium nuclear RNA, H1AC box 60                                                                         | dhv12                | protein_coding       |           |
| ENSG00000257900.2  | 412389299  | 255155553  | 9.77E-29   | 4.22E-27   | 0.88   | 0.93   | 24.2   | 18.49 | RPI1-454K7      | --                                                                                                      | dhv14                | lncRNA               |           |
| ENSG00000204519.9  | 533514628  | 96792329   | 5.30E-25   | 1.84E-23   | 0      | 0.03   | 0.08   | 0.12  | ZNF561          | zinc finger protein 561                                                                                 | dhv19                | protein_coding       |           |
| ENSG00000100662.8  | 2011177    | 32013931   | 0.0001489  | 0.00075643 | 106.06 | 106.06 | 33.2   | 33.05 | SCN3B1          | solute carrier family 3, subunit A, NHE3, cation proton antiporter 3, member 3 regulator 1              | dhv19                | protein_coding       |           |
| ENSG00000239002.3  | 216997933  | -1.4723902 | 0.00061439 | 0.00211279 | 0.32   | 0.17   | 2.23   | 0.91  | SCARN10         | small Cajal body-specific RNA 10                                                                        | dhv12                | snoRNA               |           |
| ENSG00000125295.7  | 24068512   | -1.7604879 | 0.0140682  | 0.0449832  | 0.05   | 0      | 0.13   | 0.27  | LRR6C           | leucine rich repeat containing 6                                                                        | dhv10                | protein_coding       |           |
| ENSG00000103441.14 | 24923818   | 24978056   | 9.33E-11   | 9.37E-10   | 2.46   | 0.42   | 0.42   | 0.42  | CLC-like kinase | CLC-like kinase                                                                                         | dhv12                | protein_coding       |           |
| ENSG0000008116.5   | 56343951   | 123950035  | 2.04E-28   | 6.66E-27   | 0.02   | 0.03   | 1.9    | 1.33  | LYNS            | Lim domain box 5                                                                                        | dhv12                | protein_coding       |           |
| ENSG00000271127.1  | 1.1914851  | -2.8969639 | 0.0108385  | 0.0148951  | 0      | 0      | 0      | 0     | LYN2            | LYN2                                                                                                    | dhv12                | sense_intronic       |           |
| ENSG0000015419.13  | -5.822915  | 359094348  | 3.83E-52   | 5.96E-50   | 0.54   | 6.18   | 0.07   | 0.19  | FAM167A         | family with sequence similarity 167, member A                                                           | dhv2                 | protein_coding       |           |
| ENSG00000273046.1  | 1.73212547 | -1.296187  | 0.0020274  | 0.0061882  | 0.12   | 0.06   | 0.62   | 0.2   | RPI1-834CL      | --                                                                                                      | dhv12                | processed_transcript |           |
| ENSG0000026456.1   | 1.87179549 | -1.6034558 | 0.0001919  | 0.0013541  | 0.03   | 0.03   | 0.03   | 0.12  | RPI1-848P1      | --                                                                                                      | dhv12                | sense_intronic       |           |
| ENSG0000017925.14  | -5.243971  | 381654499  | 1.40E-45   | 1.49E-43   | 7.25   | 6.49   | 0.24   | 0.24  | GHDG            | GHD3 domain containing                                                                                  | dhv17                | protein_coding       |           |
| ENSG00000135916.14 | 12143055   | 0.94848105 | 0.0007025  | 0.0023995  | 0.18   | 0.35   | 0.47   | 1.19  | LRCL1           | leucine rich repeat containing 1                                                                        | dhv2                 | protein_coding       |           |
| ENSG00000240964.3  | 4.8946289  | -0.059596  | 0.0188973  | 0.0451957  | 0      | 0      | 0.34   | 0.34  | RN7SL75P1       | RNA, 7SL, cytoplasmic 75L1 pseudogene                                                                   | dhv2                 | misc_RNA             |           |
| ENSG0000017391.7   | 42801599   | 226542242  | 4.56E-33   | 2.45E-31   | 0.22   | 0.4    | 0.54   | 10.03 | OLR1            | oxidized low density lipoprotein (lectin-like) receptor 1                                               | dhv12                | protein_coding       |           |
| ENSG0000016474.5   | 10309691   | 132027035  | 9.33E-16   | 3.97E-14   | 0.34   | 0.34   | 0.29   | 2.18  | CIB2            | gap junction protein, beta 2, 280kDa                                                                    | dhv2                 | protein_coding       |           |
| ENSG0000013138.18  | 53572699   | 0.69421728 | 2.04E-23   | 6.72E-22   | 0.01   | 0      | 0.02   | 0.48  | TBC1D8B         | TBC1 domain family, member 8B (with GRAM domain)                                                        | dhvX                 | protein_coding       |           |
| ENSG0000018438.13  | -57.67282  | -1.0573739 | 6.98E-12   | 7.96E-11   | 0.29   | 0.87   | 0      | 0     | PRR16           | proline rich 16                                                                                         | dhv2                 | protein_coding       |           |
| ENSG0000018606.12  | 13456646   | 42012904   | 6.98E-07   | 5.36E-06   | 4.91   | 11.39  | 0.28   | 21.8  | CHMP5           | charged multivesicular body protein 5                                                                   | dhv2                 | protein_coding       |           |
| ENSG00000152944.7  | 123600818  | 0.88865173 | 0.0008488  | 0.0020123  | 0.48   | 0.42   | 0.73   | 2.1   | MDM21           | mediator complex subunit 21                                                                             | dhv10                | protein_coding       |           |
| ENSG00000253004.1  | 1.6130963  | 1.1907663  | 1.21E-06   | 7.96E-06   | 1.6    | 1.6    | 1.71   | 0.39  | RPI1-166P1      | --                                                                                                      | dhv12                | lncRNA               |           |
| ENSG0000014865.13  | -1.4652778 | 13375793   | 1.21E-05   | 5.79E-05   | 0.68   | 0.56   | 0.25   | 0.34  | C10orf11        | chromosome 10 open reading frame 11                                                                     | dhv10                | protein_coding       |           |
| ENSG00000276368.1  | 1.9667032  | -0.4083181 | 2.95E-05   | 0.00013143 | 0.41   | 0.73   | 4.72   | 1.34  | HST1D2A1        | histone d2, H2a                                                                                         | dhv6                 | protein_coding       |           |
| ENSG00000196467.12 | -1.6309143 | 117658389  | 2.34E-16   | 1.86E-18   | 138.23 | 322.65 | 184.92 | 3.65  | TRK4            | transforming growth factor receptor type 4                                                              | dhv13                | protein_coding       |           |
| ENSG0000068129.1   | 1.2668057  | 17733029   | 0.00010635 | 0.00042567 | 3      | 2.63   | 3.7    | 10.78 | RPI1-91G21      | --                                                                                                      | dhv3                 | lncRNA               |           |
| ENSG00000197608.10 | 17886733   | 0.98659696 | 2.95E-07   | 1.85E-06   | 0.06   | 0.27   | 0.61   | 0.99  | ZNF491          | zinc finger protein 491                                                                                 | dhv19                | protein_coding       |           |
| ENSG0000014640.9   | 1.2238535  | 5.883271   | 9.33E-16   | 3.97E-14   | 0.34   | 0.34   | 0.29   | 4.63  | MYT1C1          | myotubularin 1C                                                                                         | dhv19                | protein_coding       |           |
| ENSG00000160679.11 | -1.2045047 | 711872565  | 2.99E-05   | 0.00013272 | 36.73  | 38.09  | 22.16  | 21.06 | CHTOP           | chromatin target of PRMT1                                                                               | dhv10                | protein_coding       |           |
| ENSG00000153714.5  | -44779027  | 31536971   | 4.02E-35   | 2.37E-33   | 7.52   | 8.22   | 0.31   | 0.65  | LRRAPL1         | leucine rich adaptor protein 1-like                                                                     | dhv10                | protein_coding       |           |
| ENSG0000010348.11  | 1.0520159  | 23884665   | 1.05E-06   | 6.02E-06   | 0.2    | 0.2    | 0.2    | 0.2   | PROM11          | PR domain containing 11                                                                                 | dhv10                | protein              |           |

|                    |             |            |            |            |            |            |            |        |                                              |       |                |
|--------------------|-------------|------------|------------|------------|------------|------------|------------|--------|----------------------------------------------|-------|----------------|
| ENSG00000261488.1  | 222313099   | -21788768  | 0.02071392 | 0.04894969 | 0.03       | 0.01       | 0.4        | 0.27   | RP11-75731--                                 | chr3  | antisense      |
| ENSG0000023051.4   | 234232143   | -1143754   | 0.0712     | 0.0712     | 0.1        | 0.05       | 1.67       | 0.15   | CTB-89122--                                  | chr3  | antisense      |
| ENSG00000249810.5  | -31422986   | 49871032   | 1.42E-23   | 4.5E-22    | 11.71      | 11.49      | 1.64       | 1.87   | ANXA8                                        | chr10 | protein_coding |
| ENSG00000173013.5  | 13807499    | 21221595   | 1.56E-05   | 7.32E-05   | 0.9        | 0.94       | 3          | 3.36   | CDC36                                        | chr3  | protein_coding |
| ENSG00000161140.1  | 47172883    | 31445547   | 0.00000000 | 0.00000000 | 0.00000000 | 0.00000000 | 0.00000000 | 0.12   | RP11-20231.3                                 | chr16 | antisense      |
| ENSG00000118849.8  | 13025029    | 0.43116358 | 0.00055696 | 0.00132776 | 0.35       | 0.22       | 0.96       | 0.09   | BARRF5                                       | chr4  | protein_coding |
| ENSG00000093076.7  | 2205004     | 10740898   | 2.48E-09   | 2.06E-08   | 0.06       | 0.06       | 0.07       | 0.45   | BAK3                                         | chr12 | protein_coding |
| ENSG0000023537.1   | 31391971    | -2.945251  | 0.00000000 | 0.00000000 | 0.00000000 | 0.00000000 | 0.00000000 | 0.12   | RP11-30517                                   | chr4  | antisense      |
| ENSG00000145945.5  | -13543008   | 472093308  | 3.83E-06   | 2.01E-05   | 16.29      | 15.45      | 8.32       | 8.22   | FAM50B                                       | chr6  | protein_coding |
| ENSG0000013886.12  | 61403001    | -2.097315  | 5.19E-06   | 2.66E-05   | 0.07       | 0.01       | 0.01       | 0.11   | ZFP37                                        | chr9  | protein_coding |
| ENSG0000015494.12  | 4913702     | 173414     | 1.09E-12   | 1.09E-12   | 0.26       | 0.36       | 1.39       | 2.44   | USP12                                        | chr15 | protein_coding |
| ENSG0000011758.12  | -2730681    | 70046512   | 1.93E-19   | 4.4E-18    | 116.68     | 146.44     | 27.52      | 25.17  | DNB1                                         | chr15 | protein_coding |
| ENSG0000027046.3   | -5102555    | 3126772    | 0.010155   | 0.038242   | 0.0        | 0.39       | 1.6        | 0.11   | RP11-701H2                                   | chr15 | antisense      |
| ENSG00000104626.13 | 10381141    | 14044017   | 0.0015646  | 0.00374885 | 0.24       | 0.29       | 0.62       | 0.88   | ERI1                                         | chr10 | protein_coding |
| ENSG00000171224.8  | 134989304   | 305342062  | 9.48E-06   | 4.62E-05   | 4.22       | 2.79       | 12.27      | 11.61  | CDJ05                                        | chr10 | protein_coding |
| ENSG00000151715.6  | -49713807   | 5105533    | 7.25E-15   | 1.4E-13    | 0.38       | 0.46       | 0.04       | 0      | TMEM45B                                      | chr11 | protein_coding |
| ENSG0000013174.13  | 15131330    | 207690459  | 2.53E-06   | 1.37E-05   | 0.22       | 0.17       | 0.65       | 0.82   | TBC1D5                                       | chr11 | protein_coding |
| ENSG0000004700.14  | 37256106    | 22601462   | 4.64E-24   | 1.50E-22   | 0.19       | 0.08       | 1.35       | 3.55   | RECOL                                        | chr12 | protein_coding |
| ENSG0000019760.11  | 32643989    | 15554587   | 7.44E-18   | 1.51E-16   | 0.04       | 0.08       | 0.49       | 1.08   | FAR1                                         | chr11 | protein_coding |
| ENSG00000210708.15 | -74299106   | 11011478   | 4.95E-47   | 4.95E-44   | 1148.04    | 1164.16    | 9.24       | 8.61   | TGFB1                                        | chr9  | protein_coding |
| ENSG00000676351.11 | 16559549    | 64078281   | 1.52E-08   | 1.14E-07   | 5.17       | 5.2        | 21.94      | 21.61  | SCF6A1                                       | chr17 | protein_coding |
| ENSG00000106992.12 | 21476449    | 0.2311319  | 0.0013639  | 0.00511942 | 0.05       | 0.09       | 0.13       | 0.31   | IKTN                                         | chr16 | protein_coding |
| ENSG00000164338.8  | 100146034   | 237410537  | 0.0009371  | 0.00205136 | 0.3        | 0.75       | 1.06       | 1.88   | UTP15                                        | chr15 | protein_coding |
| ENSG000006769.18   | -1.047826   | 10533397   | 0.0025874  | 0.00595857 | 397.25     | 371.67     | 251.94     | 243.49 | ADRA                                         | chr17 | protein_coding |
| ENSG0000077996.1   | 21759443    | 0.97521    | 0.0011292  | 0.0034496  | 0.01       | 0.13       | 0.39       | 0.45   | HDOC1-T1                                     | chr17 | protein_coding |
| ENSG00000250697.1  | -57776308   | -2.709582  | 0.0004761  | 0.00167191 | 0.43       | 0.09       | 0          | 0      | CTD-2066L2--                                 | chr5  | incRNA         |
| ENSG00000170471.13 | 12251484    | 42038457   | 2.23E-05   | 0.00014476 | 0.95       | 1.1        | 2.99       | 3.41   | SALGAPB                                      | chr20 | protein_coding |
| ENSG0000008294.19  | 2004346     | 38091974   | 2.38E-11   | 2.55E-10   | 0.38       | 0.63       | 2.15       | 3.42   | SPAG9                                        | chr17 | protein_coding |
| ENSG00000170870.10 | 33478931    | -2.465382  | 0.0019023  | 0.00584723 | 0.02       | 0          | 0.25       | 0.05   | STAP2                                        | chr19 | protein_coding |
| ENSG00000130768.13 | 13823123    | 0.1637013  | 2.67E-12   | 3.0E-11    | 0.06       | 0.07       | 1.5        | 0.19   | SMAP3L3B                                     | chr19 | protein_coding |
| ENSG0000010202.6   | -1.232363   | 92767036   | 1.86E-05   | 8.58E-05   | 596.75     | 608.85     | 343.34     | 339.69 | FBL                                          | chr19 | protein_coding |
| ENSG00000278963.1  | 56828014    | -2.656968  | 0.0004761  | 0.00167191 | 0          | 0          | 0.09       | 0.11   | RP11-29422--                                 | chr17 | TEC            |
| ENSG00000275988.1  | 28613285    | -0.851404  | 0.015339   | 0.01762363 | 0.21       | 0.05       | 1.87       | 1.43   | RP11-518M1                                   | chr17 | antisense      |
| ENSG00000259884.1  | 477203895   | -3.141721  | 0.0188873  | 0.04519557 | 0.028      | 0.08       | 0.04       | 0.04   | RP11-1100L--                                 | chr12 | incRNA         |
| ENSG00000114210.10 | 26996759    | 1398393    | 6.51E-11   | 4.20E-13   | 0.07       | 0.08       | 0.48       | 0.56   | CTD-2066L2--                                 | chr3  | protein_coding |
| ENSG00000167147.16 | 11502008    | 71938471   | 6.38E-05   | 0.00029197 | 54.33      | 50.69      | 32.27      | 30.67  | RNF220                                       | chr3  | protein_coding |
| ENSG00000114439.17 | 31652031    | 2.99333084 | 5.68E-21   | 1.47E-19   | 0.04       | 0.02       | 1.07       | 2      | BXB                                          | chr3  | protein_coding |
| ENSG0000014448.7   | 12643636    | 1398393    | 6.51E-11   | 4.20E-13   | 0.07       | 0.08       | 0.48       | 0.56   | GATA binding protein 7                       | chr18 | protein_coding |
| ENSG00000179403.11 | -4.053051   | -1.6931074 | 1.57E-07   | 1.02E-06   | 0.11       | 0.06       | 0.01       | 0.01   | WVAL                                         | chr1  | protein_coding |
| ENSG00000185650.9  | -13948482   | 57725406   | 1.65E-06   | 9.21E-06   | 11.94      | 13.99      | 6.25       | 6.89   | ZFP36L1                                      | chr14 | protein_coding |
| ENSG00000184730.9  | 13647958    | 1398393    | 6.51E-11   | 4.20E-13   | 0.07       | 0.08       | 0.48       | 0.56   | APOR8                                        | chr14 | protein_coding |
| ENSG00000218336.6  | 109265577   | 1.602084   | 0.0008556  | 0.0029427  | 0.07       | 0.21       | 0.29       | 0.51   | TENM3                                        | chr14 | protein_coding |
| ENSG00000105022.7  | 130430567   | 31719544   | 1.73E-05   | 8.02E-05   | 1.21       | 0.95       | 1.21       | 0.95   | GNPNAT1                                      | chr14 | protein_coding |
| ENSG0000024028.4   | 13647958    | 1398393    | 6.51E-11   | 4.20E-13   | 0.07       | 0.08       | 0.48       | 0.56   | KLHL3                                        | chr14 | protein_coding |
| ENSG0000016713.14  | 29348999    | -0.763513  | 0.0004178  | 0.0014836  | 0.01       | 0          | 0.04       | 0.08   | LARI                                         | chr1  | protein_coding |
| ENSG00000141384.10 | 21077884    | 0.0696104  | 2.18E-07   | 1.39E-06   | 0.1        | 0.08       | 0.21       | 0.73   | IFAP4                                        | chr18 | protein_coding |
| ENSG0000014994.10  | 33602259    | 3.4440216  | 2.44E-25   | 4.45E-23   | 0.19       | 0.14       | 0.24       | 0.22   | IFAP4                                        | chr18 | protein_coding |
| ENSG0000023527.6   | -1.5073071  | 0.87466208 | 1.88E-05   | 8.68E-05   | 4.04       | 3.82       | 1.69       | 1.98   | RP11-14N7--                                  | chr1  | incRNA         |
| ENSG00000138163.14 | 11731025    | 1.545046   | 1.54E-06   | 1.54E-06   | 0.4        | 0.16       | 0.16       | 0.15   | TMN1                                         | chr12 | protein_coding |
| ENSG00000187815.6  | -14209518   | 6.6223338  | 1.01E-06   | 5.79E-06   | 36.26      | 36.89      | 17.78      | 18.66  | CDJ02                                        | chr10 | protein_coding |
| ENSG00000086915.5  | 15250291    | 373832128  | 4.21E-07   | 2.58E-06   | 2.31       | 1.61       | 5.68       | 9.41   | CPOX                                         | chr13 | protein_coding |
| ENSG0000045390.10  | 253640933   | -0.026398  | 1.82E-08   | 1.94E-07   | 0.06       | 0.09       | 0.14       | 0.29   | USP35                                        | chr4  | protein_coding |
| ENSG0000013077.18  | 282391309   | 0.3626286  | 2.88E-11   | 3.07E-10   | 0.03       | 0.08       | 0.3        | 0.79   | ZNF675                                       | chr19 | protein_coding |
| ENSG00000131409.11 | 73278347    | -1.382107  | 4.49E-10   | 4.11E-09   | 0          | 0          | 0.24       | 0.18   | LRRCC4B                                      | chr19 | protein_coding |
| ENSG00000155902.15 | 10864981    | 6.503296   | 0.0004761  | 0.00167191 | 0.43       | 0.09       | 0          | 0      | LRLS1                                        | chr19 | protein_coding |
| ENSG00000197457.8  | -3.551023   | 5.94066524 | 4.49E-29   | 1.99E-27   | 38.77      | 35.97      | 4          | 4.1    | STMN3                                        | chr20 | protein_coding |
| ENSG0000017575.11  | -1.563053   | 4.8632975  | 1.08E-07   | 7.22E-07   | 6.29       | 5.85       | 2.98       | 2.91   | PANAT1                                       | chr11 | protein_coding |
| ENSG0000016168.6   | 11781838    | 1.0734236  | 6.94E-05   | 0.0023862  | 0.2        | 0.07       | 0.05       | 0.08   | TMEM184C                                     | chr11 | protein_coding |
| ENSG00000175445.13 | -12.08065   | 3.9024346  | 1.09E-61   | 2.96E-59   | 3.29       | 3.6        | 1          | 0      | LPL                                          | chr1  | protein_coding |
| ENSG0000007532.13  | 117174326   | 6.0008007  | 1.17E-05   | 0.0008007  | 0.4        | 0.04       | 0.16       | 16.13  | SAR1A                                        | chr10 | protein_coding |
| ENSG0000017928.12  | 14543793    | 2.19857601 | 5.46E-06   | 2.78E-05   | 0.44       | 0.62       | 1.69       | 2.19   | VPB28                                        | chr17 | protein_coding |
| ENSG00000136384.13 | 20351794    | -0.7212399 | 7.18E-05   | 0.00029725 | 0.12       | 0.09       | 0.46       | 0.73   | SFR1                                         | chr10 | protein_coding |
| ENSG0000025187.2   | 18642521    | 0.1454E-09 | 5.10E-10   | 1.45E-09   | 1.42       | 1.57       | 0.58       | 5.61   | HCKA10                                       | chr17 | protein_coding |
| ENSG00000120519.13 | 17055487    | -0.495909  | 0.017088   | 0.0451326  | 0.06       | 0.04       | 0.12       | 0.17   | SLC12AT2                                     | chr10 | protein_coding |
| ENSG00000197142.9  | 45898491    | 5.45687342 | 6.03E-42   | 5.02E-40   | 0.67       | 0.78       | 22.18      | 24.59  | ACSL5                                        | chr10 | protein_coding |
| ENSG0000027364.11  | 18642521    | 0.1454E-09 | 5.10E-10   | 1.45E-09   | 1.42       | 1.57       | 0.58       | 5.61   | HCKA10                                       | chr17 | protein_coding |
| ENSG00000134986.12 | -1.1619332  | 3.2905451  | 1.01E-07   | 6.80E-07   | 2.42       | 2.42       | 1.03       | 1.07   | NREP                                         | chr15 | protein_coding |
| ENSG0000017554.15  | 28524402    | -1.181837  | 7.05E-06   | 3.52E-05   | 0.02       | 0          | 0.11       | 0.13   | CHRNA7                                       | chr15 | protein_coding |
| ENSG00000186422.11 | 46867829    | 1.9305429  | 4.25E-10   | 3.50E-09   | 4.54       | 2.3        | 0.75       | 1.66   | FAM174B                                      | chr15 | protein_coding |
| ENSG00000255120.14 | 89264824    | -0.002793  | 2.38E-20   | 5.90E-19   | 0          | 0          | 2.95       | 2.7    | OVOL1                                        | chr11 | antisense      |
| ENSG0000012688.16  | -3.9731596  | 2.7047946  | 3.46E-29   | 1.55E-27   | 0.27       | 0.29       | 0.07       | 0.27   | GRX4                                         | chrX  | protein_coding |
| ENSG00000137760.17 | 18102253    | 0.6039869  | 2.88E-05   | 5.72E-07   | 0.11       | 0.05       | 0.06       | 0.17   | AKG8B                                        | chrX  | protein_coding |
| ENSG00000109811.9  | -5.022479   | -3.129504  | 0.010045   | 0.0288742  | 0.06       | 0.08       | 0          | 0      | ANKA10                                       | chrX  | protein_coding |
| ENSG00000186108.3  | -0.238742   | 1.008      | 2.26E-17   | 2.26E-17   | 0.05       | 0.05       | 0          | 0      | CHST3                                        | chrX  | protein_coding |
| ENSG00000113719.14 | -2.5579636  | 8.75223407 | 1.79E-17   | 3.53E-16   | 88.96      | 86.02      | 19.71      | 19.89  | ERGIC1                                       | chrX  | protein_coding |
| ENSG00000269556.6  | -10779888   | 4.53917238 | 0.0022197  | 0.00383259 | 7.91       | 8.46       | 5.16       | 5.17   | TMEM15A                                      | chrX  | protein_coding |
| ENSG00000256668.13 | 13295929    | 0.0328623  | 1.32E-06   | 1.32E-06   | 9.36       | 9.36       | 0.19       | 0.19   | ATPase, Ca++ transporting, plasma membrane 4 | chrX  | protein_coding |
| ENSG00000163286.6  | 38733794    | -0.6256678 | 1.54E-10   | 1.51E-09   | 0.01       | 0.03       | 0.45       | 0.46   | ALPL2                                        | chr2  | protein_coding |
| ENSG00000256984.1  | -4.80998    | -3.212042  | 0.0088873  | 0.04519557 | 0.19       | 0.2        | 0          | 0      | RP11-698A5--                                 | chr18 | incRNA         |
| ENSG0000021151.5   | 85957449    | 0.328927   | 6.51E-07   | 7.22E-05   | 1.49       | 1.49       | 0.18       | 1.49   | HAK1B                                        | chr1  | protein_coding |
| ENSG00000264112.1  | 214278237   | 0.08913705 | 5.07E-07   | 3.06E-06   | 0.03       | 0.09       | 0.4        | 0.33   | RP11-159D1--                                 | chr17 | incRNA         |
| ENSG00000254726.7  | -1.757133   | 3.9524201  | 5.67E-09   | 4.51E-08   | 2.66       | 3.24       | 1.13       | 1.19   | MEK3A                                        | chr1  | protein_coding |
| ENSG0000016130.13  | 11781838    | 1.0734236  | 6.94E-05   | 4.70E-07   | 0.17       | 0.17       | 0.05       | 0.14   | KBP1                                         | chr12 | protein_coding |
| ENSG00000150995.16 | 140175622   | 352904146  | 3.18E-06   | 1.69E-05   | 0.52       | 0.48       | 1.55       | 1.96   | TPR1                                         | chr1  | protein_coding |
| ENSG00000232874.1  | -4.72703895 | -3.141721  | 0.0188873  | 0.04519557 | 0.028      | 0.08       | 0.04       | 0.04   | RP11-135A1                                   | chr1  | antisense      |
| ENSG00000077935.15 | 5.0421559   | 1.6210453  | 6.64E-29   | 2.90E-27   | 0.03       | 0.04       | 1.02       | 1.9    | SMC1B                                        | chr22 | protein_coding |
| ENSG00000270308.1  | -8.1849555  | -0.833495  | 5.76E-15   | 9.17E-14   | 0.37       | 0.26       | 0          | 0      | RP11-5466B--                                 | chr15 | protein_coding |
| ENSG00000186017.13 | 19311683    | -0.386936  | 3.92E-06   | 0.07E-07   | 0.18       | 0.18       | 0.08       | 0.25   | ZNF665                                       | chr15 | protein_coding |
| ENSG00000233941.87 | 313606823   | -2.3941487 | 0.00552196 | 0.01522223 | 0.01       | 0          |            |        |                                              |       |                |

|                    |            |            |            |            |        |        |        |        |              |                                                                                   |       |                      |
|--------------------|------------|------------|------------|------------|--------|--------|--------|--------|--------------|-----------------------------------------------------------------------------------|-------|----------------------|
| ENSG0000017887.12  | 1.49244567 | 1.95636007 | 4.36E-06   | 2.27E-05   | 0.3    | 0.2    | 0.69   | 1.18   | ZNF791       | zinc finger protein 791                                                           | chr19 | protein_coding       |
| ENSG0000020468.11  | 1.8107313  | 1.01111145 | 0.0005981  | 0.01111145 | 73.1   | 72.0   | 0.13   | 43.51  | PRKCA2A      | praline-rich coiled-coil factor 2A                                                | chr19 | protein_coding       |
| ENSG0000014321.17  | -1.1790575 | 1.11423728 | 4.13E-05   | 0.00017993 | 856.47 | 963.97 | 542.67 | 527.37 | HGF          | hepatoma-derived growth factor                                                    | chr1  | protein_coding       |
| ENSG00000278206.1  | -2.9415433 | -2.7162106 | 0.0094389  | 0.02469931 | 0.08   | 0.05   | 0      | 0.03   | RP1-20N2.8   | --                                                                                | chr6  | processed_transcript |
| ENSG0000020426.11  | 1.63637161 | 1.35687231 | 0.000468   | 0.00097972 | 8.4    | 8.22   | 2.63   | 1.05   | LY8C5C       | lymphocyte antigen 6 complex, locus 5C                                            | chr6  | protein_coding       |
| ENSG00000148429.13 | 1.18466761 | 1.60510111 | 0.00032351 | 0.00117129 | 0.1    | 0.12   | 0.31   | 0.36   | USP9LN       | USP-9 terminal like                                                               | chr10 | protein_coding       |
| ENSG00000214635.8  | 3.10636999 | 2.2545109  | 8.26E-19   | 1.81E-17   | 0.73   | 0.89   | 10.66  | 8      | HIST1H2B     | histone domain 1, H2b1                                                            | chr6  | protein_coding       |
| ENSG00000159444.8  | 1.1501031  | 1.08103179 | 2.29E-05   | 0.00010317 | 6.49   | 6.22   | 2.63   | 5.49   | CENPAH       | centromere protein 1, H2b1                                                        | chr6  | protein_coding       |
| ENSG00000163093.10 | 1.42947428 | 0.90856599 | 7.91E-05   | 0.0003261  | 0.19   | 0.23   | 0.88   | 0.63   | BRSS         | Bardet-Biedl syndrome 5                                                           | chr15 | protein_coding       |
| ENSG0000018720.13  | -2.73774   | 5.9139994  | 9.58E-20   | 2.52E-18   | 8.42   | 9.62   | 1.83   | 1.67   | THSD4        | thrombospondin, type 1, domain containing 4                                       | chr15 | protein_coding       |
| ENSG00000156417.9  | 1.55650194 | 1.3861394  | 0.00014832 | 0.00014832 | 8.42   | 9.62   | 1.83   | 1.68   | USP5B        | ubiquitin-protein ligase 5B                                                       | chr10 | protein_coding       |
| ENSG00000148516.20 | 1.6227945  | 0.63862803 | 1.93E-05   | 8.89E-05   | 0.06   | 0.12   | 0.51   | 0.59   | ZEB1         | zinc finger E-box binding homeobox 1                                              | chr10 | protein_coding       |
| ENSG00000168564.5  | 3.10574023 | 1.77561214 | 1.84E-17   | 1.37E-15   | 0.1    | 0.26   | 1.47   | 2.69   | CDKN2AP      | CDKN2A interacting protein 5B                                                     | chr4  | protein_coding       |
| ENSG00000168874.11 | 2.06187145 | 5.04682698 | 6.05E-12   | 6.97E-11   | 4.21   | 4.24   | 24.74  | 22.24  | ATC8B        | atonal homolog 8 (Drosophila)                                                     | chr12 | protein_coding       |
| ENSG00000156128.4  | -6.5310329 | -2.3247802 | 1.55E-05   | 7.26E-05   | 0.51   | 0.03   | 0      | 0      | UNC00944     | long intergenic non-protein coding RNA 944                                        | chr12 | lncRNA               |
| ENSG00000145014.16 | 1.84494795 | 4.7952556  | 5.39E-16   | 4.89E-05   | 9.72   | 11.45  | 3.6    | 4.24   | TM6M44       | transmembrane protein 44                                                          | chr3  | protein_coding       |
| ENSG0000021580.1   | 1.14419553 | -0.5042789 | 0.01262798 | 0.03174808 | 0.57   | 0.94   | 2.13   | 2.32   | RP11-539L1.1 | --                                                                                | chr4  | lncRNA               |
| ENSG00000074266.16 | 1.25341754 | 4.75104777 | 1.85E-05   | 8.54E-05   | 3.11   | 3.97   | 10.38  | 12.14  | EDD          | embryonic ectoderm development                                                    | chr11 | protein_coding       |
| ENSG00000173384.1  | 5.01588682 | -2.9717446 | 0.010045   | 0.02502742 | 2.0    | 2.0    | 0.11   | 0.34   | RP11-255E6   | --                                                                                | chr12 | antense              |
| ENSG000002024729.5 | -1.1791764 | -0.4293097 | 0.0088017  | 0.02151958 | 0.32   | 0.26   | 0.2    | 0.14   | PCOLCE-AS1   | PCOLCE antisense RNA 1                                                            | chr7  | antisense            |
| ENSG00000156205.1  | 1.5655094  | -1.2737091 | 0.0035289  | 0.02229301 | 0.02   | 0.03   | 0.06   | 0.1    | UNC00950     | long intergenic non-protein coding RNA 950                                        | chr9  | lncRNA               |
| ENSG0000013869.9   | -3.3697632 | -1.761733  | 1.91E-05   | 8.90E-05   | 0.04   | 0.09   | 0.02   | 0      | BMPL1B       | bone morphogenetic protein receptor, type 1B                                      | chr9  | protein_coding       |
| ENSG00000178381.10 | -1.5264116 | 4.54919684 | 9.24E-07   | 1.53E-06   | 25.09  | 24.49  | 10.9   | 12.05  | ZFAND2A      | zinc finger, AN1-type domain 2A                                                   | chr7  | protein_coding       |
| ENSG0000016157.5   | 4.6238725  | 2.7455565  | 2.42E-07   | 5.9E-32    | 0.3    | 0.28   | 10.28  | 11.57  | PKOX         | glutathione peroxidase 7                                                          | chr7  | protein_coding       |
| ENSG00000164793.5  | 1.2407001  | 5.2065134  | 2.02E-05   | 9.98E-05   | 24.86  | 24.09  | 14.12  | 13.47  | TCFQ1        | forkhead box Q1                                                                   | chr7  | protein_coding       |
| ENSG00000164736.5  | -7.667969  | 0.6253468  | 6.99E-32   | 3.51E-30   | 1.44   | 0.99   | 0      | 0.01   | SOX17        | SRY (sex determining region Y)-box 17                                             | chr7  | protein_coding       |
| ENSG00000237931.1  | 2.02812474 | 1.3523622  | 0.0059512  | 0.0016894  | 0.1    | 0.19   | 0.35   | 0.21   | AC0203017    | --                                                                                | chr16 | antisense            |
| ENSG0000029546.1   | 2.23706831 | -1.4200231 | 0.00043455 | 0.00135757 | 0      | 0.25   | 0.98   | 0.6    | RP11-351ME   | --                                                                                | chr15 | antisense            |
| ENSG00000141446.9  | 2.98784906 | 59777642   | 8.12E-14   | 1.15E-12   | 0.08   | 0.06   | 0.54   | 0.97   | ESCO1        | establishment of sister chromatid cohesion N-acetyltransferase 1                  | chr18 | protein_coding       |
| ENSG00000246932.4  | 1.12326844 | -1.1737619 | 0.0001987  | 0.00020024 | 0.21   | 0.17   | 0      | 0.39   | RP11-319J56  | --                                                                                | chr19 | protein_coding       |
| ENSG00000176222.8  | 4.87917439 | -0.3678699 | 0.0188973  | 0.04519557 | 0      | 0      | 0      | 0.12   | ZNF404       | zinc finger protein 404                                                           | chr19 | protein_coding       |
| ENSG00000120594.15 | -1.5134293 | 2.80533961 | 9.27E-07   | 5.36E-06   | 0.59   | 0.75   | 0.34   | 0.29   | PLOC22       | pleckstrin domain containing 22                                                   | chr10 | protein_coding       |
| ENSG0000011524.6   | 1.336617   | -2.0917631 | 0.003518   | 0.04824273 | 0.22   | 0.63   | 0.09   | 0.11   | AKAP3        | A kinase (PKA) anchor protein 3                                                   | chr10 | protein_coding       |
| ENSG00000174564.11 | -1.1583458 | 0.5788028  | 6.62E-05   | 0.00028422 | 18.68  | 18.21  | 11.3   | 10.71  | L209B        | interleukin 20 receptor beta                                                      | chr10 | protein_coding       |
| ENSG0000021567.6   | 5.49557229 | 9.926283   | 9.34E-05   | 1.30E-54   | 19.19  | 18.62  | 33.9   | 18.13  | ATAT1A1      | metastatic associated lung adenocarcinoma transcript 1 (non-protein coding)       | chr11 | lncRNA               |
| ENSG00000113013.11 | 1.28074438 | 1.62340519 | 8.07E-06   | 4.00E-05   | 176.47 | 209.67 | 61.9   | 119.39 | HSF9A        | heat shock 70kDa protein 9 (mortalin)                                             | chr10 | protein_coding       |
| ENSG00000180992.6  | -1.1465748 | 5.96219042 | 7.42E-05   | 0.00030864 | 73.57  | 61.55  | 43.29  | 37.57  | MRPL14       | mitochondrial ribosomal protein L14                                               | chr6  | protein_coding       |
| ENSG00000228672.3  | 1.53702943 | 1.23553838 | 1.96E-07   | 2.8E-06    | 0.5    | 0.79   | 2.9    | 2.14   | PCB21        | proline-rich basic protein 1                                                      | chr16 | protein_coding       |
| ENSG0000027466.1   | -1.4354891 | 2.37667379 | 4.63E-06   | 2.40E-05   | 7.89   | 8.21   | 35.9   | 4.34   | RP11-548H3   | --                                                                                | chr12 | antisense            |
| ENSG00000128311.12 | 1.12647234 | 4.5589906  | 0.00013347 | 0.00052666 | 5.1    | 3.85   | 13.77  | 12.25  | TT5          | thiolate-sulfurtransferase (rhodanese)                                            | chr22 | protein_coding       |
| ENSG00000204584.10 | 1.01047465 | 6.8802464  | 6.19E-06   | 0.0041921  | 49.76  | 50.2   | 3.5    | 3.27   | C26H136      | chromosome 6 open reading frame 136                                               | chr4  | protein_coding       |
| ENSG00000084636.16 | -3.9121385 | 4.0928201  | 7.82E-33   | 4.14E-31   | 7.28   | 7.53   | 0.68   | 0.63   | COL16A1      | collagen, type XVI, alpha 1                                                       | chr1  | protein_coding       |
| ENSG00000172124.2  | 7.2573882  | -1.4533982 | 1.11E-09   | 9.61E-09   | 0      | 0      | 0      | 0.28   | MAB21L1      | matl-21-like 3 (C. elegans)                                                       | chr1  | protein_coding       |
| ENSG0000025284.2   | -7.6864533 | -2.2527193 | 0.0017488  | 0.00541913 | 0.16   | 0.07   | 0.27   | 0.04   | RP11-282Q2   | --                                                                                | chr12 | sense_intronic       |
| ENSG00000107859.8  | -3.6218558 | -1.2530837 | 2.89E-08   | 2.08E-07   | 0.63   | 0.18   | 0.02   | 0.06   | PTX3         | cardiol-like homeodomain 3                                                        | chr10 | protein_coding       |
| ENSG00000235058.1  | 1.6495049  | -1.8108604 | 0.01883218 | 0.04519557 | 0      | 0.31   | 0.75   | 0.54   | RP1-17019.19 | --                                                                                | chr7  | lncRNA               |
| ENSG00000251778.3  | 1.04680446 | -2.9786228 | 0.010045   | 0.02502742 | 0      | 0.08   | 0.91   | 0.08   | RP11-351E42  | --                                                                                | chr17 | sense_intronic       |
| ENSG00000091966.14 | -1.1579348 | 4.3391362  | 1.03E-07   | 6.88E-07   | 1.85   | 2.09   | 0.83   | 0.92   | CCDC80       | coiled-coil domain containing 80                                                  | chr3  | protein_coding       |
| ENSG00000164904.14 | 1.68054796 | 6.88054548 | 9.75E-09   | 6.18E-101  | 38.19  | 38.19  | 0.16   | 0.15   | ADVT1A       | aldehyde dehydrogenase 7 family, member A1                                        | chr3  | protein_coding       |
| ENSG00000279369.1  | 4.7956781  | 1.23823308 | 1.95E-25   | 6.94E-24   | 0.13   | 0      | 2.93   | 2.11   | CCDC11       | coiled-coil domain containing 11                                                  | chr17 | TEC                  |
| ENSG00000204767.3  | -7.5043988 | -1.4111571 | 7.65E-11   | 7.77E-10   | 0.11   | 0.26   | 0      | 0      | FAM196B      | family with sequence similarity 196, member B                                     | chr5  | protein_coding       |
| ENSG00000181744.7  | 1.8153303  | 4.890429   | 3.24E-06   | 7.13E-06   | 0.6    | 0.07   | 0.27   | 0.86   | C26H136      | chromosome 6 open reading frame 136                                               | chr4  | protein_coding       |
| ENSG00000126522.15 | -1.3438993 | 6.62271172 | 3.54E-06   | 1.87E-05   | 54.25  | 44.48  | 26.62  | 25.21  | ASL          | arabinosuccinate carboxylase                                                      | chr7  | protein_coding       |
| ENSG00000215252.10 | 3.68318403 | 1.0956408  | 1.25E-18   | 2.71E-17   | 0.26   | 0.04   | 0.08   | 1.12   | GOLGA8B      | golgin A8 family, member 8                                                        | chr15 | protein_coding       |
| ENSG00000186510.10 | 1.01841295 | 1.0889819  | 9.78E-05   | 0.00039461 | 0.59   | 0.6    | 0.07   | 0.1    | GLIC4A       | glutathione S-transferase gamma 4A                                                | chr1  | protein_coding       |
| ENSG00000102943.14 | -5.0243296 | -3.1290017 | 0.010045   | 0.02582742 | 0.01   | 0.06   | 0      | 0      | MTMR8        | myotubularin related protein 8                                                    | chr10 | protein_coding       |
| ENSG0000019177.13  | -6.653994  | -2.7615509 | 0.0006864  | 0.00028128 | 0.07   | 0.01   | 0      | 0      | ELVOL2       | ELVOL1 fatty acid elongase 2                                                      | chr6  | protein_coding       |
| ENSG0000011807.15  | 1.3218503  | 4.8945145  | 6.13E-06   | 3.13E-05   | 1.44   | 1.46   | 1.46   | 1.99   | PRK4         | protein kinase 4                                                                  | chr6  | protein_coding       |
| ENSG00000134184.11 | -12.466617 | 1.33891524 | 6.15E-67   | 2.14E-64   | 12.29  | 11.53  | 0      | 0      | GSTM1        | glutathione S-transferase mu 1                                                    | chr1  | protein_coding       |
| ENSG00000163516.12 | -1.2599113 | 1.6976979  | 2.84E-06   | 6.10E-05   | 29.47  | 29.47  | 49.63  | 28.47  | ACAD10       | acyl-CoA oxidase 1 and zinc finger domain containing 1                            | chr1  | protein_coding       |
| ENSG00000204315.3  | -1.351627  | 3.9362975  | 5.53E-06   | 2.73E-05   | 13.66  | 12.77  | 7.29   | 6.5    | FKBP6        | FK506 binding protein like                                                        | chr6  | protein_coding       |
| ENSG00000124664.9  | 5.98373061 | -2.4097568 | 8.36E-05   | 0.00034052 | 0      | 0      | 0.22   | 0.06   | SPDEF        | SAM pointed domain containing ETS transcription factor                            | chr6  | protein_coding       |
| ENSG00000122319.12 | 1.820017   | 2.5349436  | 8.80E-06   | 0.00014052 | 0.21   | 0.94   | 0.16   | 0.63   | DYRK4        | DYRK4-specific tyrosine-(Y)-phosphatase regulated kinase 4                        | chr12 | protein_coding       |
| ENSG00000134442.12 | 1.44873215 | 2.2639141  | 5.45E-06   | 2.77E-05   | 0.26   | 0.39   | 1.01   | 1.33   | KIAA1468     | KIAA1468                                                                          | chr18 | protein_coding       |
| ENSG00000196790.10 | 2.54037103 | 1.28119421 | 5.88E-12   | 6.80E-11   | 0.15   | 0.11   | 0.83   | 1.21   | STRN3        | stratin, calmodulin binding protein 3                                             | chr14 | protein_coding       |
| ENSG00000224914.2  | 1.26124673 | 1.6224673  | 0.0017919  | 0.0006444  | 0.59   | 0.59   | 0.15   | 0.21   | UNC00963     | long intergenic non-protein coding RNA 963                                        | chr14 | lncRNA               |
| ENSG00000274585.1  | -0.8672359 | 0.00536284 | 0.0148851  | 0.0148851  | 0.81   | 0.99   | 0.49   | 0.49   | RP11-22SH2   | --                                                                                | chr10 | antisense            |
| ENSG00000164059.9  | -2.9786839 | 0.02727556 | 1.61E-10   | 1.56E-09   | 0.5    | 0.44   | 0.13   | 0.05   | SPRY1        | sprouty homolog 1, antagonist of FGF signaling (Drosophila)                       | chr10 | protein_coding       |
| ENSG00000205376.15 | 1.52154672 | 1.2942024  | 0.010045   | 0.02582742 | 0.01   | 0.06   | 0      | 0.18   | PTHT2        | putative homeodomain transcription factor 2                                       | chr10 | protein_coding       |
| ENSG00000185967.7  | 3.09908944 | 1.04704283 | 7.76E-15   | 1.22E-13   | 0.48   | 0.31   | 5.34   | 3.75   | HIST1H2B     | histone domain 1, H2b1                                                            | chr6  | protein_coding       |
| ENSG00000269806.1  | 2.3428871  | -1.470759  | 1.39E-05   | 6.54E-05   | 0.12   | 0.1    | 0.72   | 0.91   | RP11-2401B1  | --                                                                                | chr17 | antisense            |
| ENSG00000102687.7  | -1.8895956 | 6.9784828  | 9.75E-09   | 6.18E-101  | 38.19  | 38.19  | 0.16   | 0.15   | ADVT1A       | aldehyde dehydrogenase 7 family, member A1                                        | chr3  | protein_coding       |
| ENSG00000268001.1  | 2.16994184 | -1.4642573 | 0.0006862  | 0.00288921 | 0      | 0.09   | 0.21   | 0.3    | CARD6-AS1    | CARD6 antisense RNA 1                                                             | chr19 | antisense            |
| ENSG00000274157.7  | 1.15320925 | 2.8227105  | 0.0003776  | 0.00014052 | 0.22   | 0.73   | 0.16   | 1.15   | APR4         | apoptosis related, palmitoylated 5 (IMAGL/C55 subfamily member 5)                 | chr19 | protein_coding       |
| ENSG00000153914.14 | 2.85054818 | 1.23832603 | 1.66E-18   | 3.56E-17   | 0.17   | 0.24   | 1.27   | 2.72   | SEK1         | serine/threonine kinase 1 and zinc finger domain containing 1                     | chr1  | protein_coding       |
| ENSG00000135740.15 | 2.096014   | 2.61504321 | 6.15E-11   | 6.31E-10   | 0.62   | 0.37   | 2.69   | 2.97   | SLC3A5       | solute carrier family 3, subfamily A (NHE3, cation proton antiporter 5), member 5 | chr16 | protein_coding       |
| ENSG0000012289.9   | -2.6817989 | 1.9254673  | 7.78E-12   | 4.00E-11   | 45.28  | 45.28  | 1.04   | 0.19   | CDNA5        | CDP-nanase 45-dehydrolyase                                                        | chr16 | protein_coding       |
| ENSG00000251151.2  | -6.0843633 | 2.94100195 | 8.39E-47   | 9.76E-45   | 12.22  | 12.38  | 0.32   | 0.16   | HOXC-AS3     | HOXC domain antisense RNA 3                                                       | chr12 | crossed_transcript   |
| ENSG0000027969.10  | -2.2681003 | 2.9566398  | 8.20E-13   | 1.04E-11   | 5.61   | 6.67   | 2.13   | 2.17   | SH2D2A       | SH2 domain containing 2A                                                          | chr1  | protein_coding       |
| ENSG0000016767.3   | 1.892131   | 5.0174131  | 5.07E-14   | 1.46E-13   | 1.     |        |        |        |              |                                                                                   |       |                      |

|                    |            |            |            |             |         |         |         |         |              |                                                                       |                                                            |                |                |
|--------------------|------------|------------|------------|-------------|---------|---------|---------|---------|--------------|-----------------------------------------------------------------------|------------------------------------------------------------|----------------|----------------|
| ENSG00000169371.12 | -1.6421437 | 4.08573931 | 3.800E-08  | 2.68E-07    | 9.1     | 0       | 9.71    | 3.63    | 441          | SNUPNP                                                                | snurportin 1                                               | chr15          | protein_coding |
| ENSG00000129344.7  | -1.7180938 | 1.2785988  | 1.05E-08   | 1.81E-08    | 0       | 0       | 0       | 0       | 131          | ATP7B                                                                 | ATPase Na+/K+-transporting, beta 2 polypeptide             | chr15          | protein_coding |
| ENSG0000025932.3   | 5.6734729  | -2.6109587 | 0.00047761 | 0.00167191  | 0       | 0       | 0       | 0.05    | 0.11         | CTAGE4                                                                | CTAGE family, member 4                                     | chr7           | protein_coding |
| ENSG00000139333.8  | 2.06657184 | 1.19598472 | 7.52E-09   | 5.88E-08    | 0.06    | 0.07    | 0.38    | 0.4     | 0.06         | DKGK                                                                  | diacylglycerol kinase, epsilon 64kDa                       | chr17          | protein_coding |
| ENSG0000023807.2   | -2.4048916 | 0.00491297 | 1.36E-06   | 1.03E-07    | 0       | 0       | 0       | 0       | 0.08         | RP11-536K7.1                                                          | ...                                                        | chr17          | antisense      |
| ENSG00000157965.16 | -1.1369005 | 1.51796218 | 9.05E-05   | 0.00036647  | 2.9     | 3.38    | 1.77    | 0.5     | 0.23         | AGAP1                                                                 | ArifGap with GTPase domain, ankyrin repeat and PH domain 1 | chr17          | protein_coding |
| ENSG00000134369.14 | -4.436041  | 5.9118531  | 1.46E-10   | 1.10E-38    | 6.36    | 6.83    | 0.5     | 0.31    | NAV1         | navarin navigator 1                                                   | chr1                                                       | protein_coding |                |
| ENSG00000166186.13 | 1.29745778 | 1.17E-10   | 1.10E-09   | 0.03        | 0.07    | 0.07    | 0.07    | 0.32    | 0.12         | KAA1S958                                                              | KAA1S958                                                   | chr1           | protein_coding |
| ENSG00000157426.12 | 1.5697504  | 0.30855066 | 7.67E-05   | 0.00031656  | 0.07    | 0.17    | 0.51    | 0.44    | ASODH        | aminooxidase-semialdehyde dehydrogenase                               | chr4                                                       | protein_coding |                |
| ENSG00000188015.8  | -6.5231538 | 5.499367   | 4.67E-06   | 1.55E-43    | 78.61   | 73.09   | 1.31    | 0.88    | S100A3       | S100 calcium binding protein 3                                        | chr1                                                       | protein_coding |                |
| ENSG0000017476.1   | -0.0031198 | 0.00343861 | 0.00487979 | 0.00491197  | 0.19    | 0.12    | 0.04    | 0.54    | RP11-147L1.1 | ...                                                                   | chr17                                                      | protein_coding |                |
| ENSG00000273341.1  | 4.87917439 | -0.0078699 | 0.00089873 | 0.04195957  | 0       | 0       | 0       | 0       | 0            | RPS-899B9.1                                                           | ...                                                        | chr17          | lncRNA         |
| ENSG00000208035.14 | 1.2441494  | 0.7272337  | 3.13E-06   | 1.75E-05    | 0.05    | 0.26    | 0.65    | 0.89    | ALG6         | ALG6, alpha-1,3-phospho-transferase                                   | chr1                                                       | protein_coding |                |
| ENSG00000152193.7  | 1.6094913  | 1.5336651  | 2.24E-06   | 1.23E-05    | 0.26    | 0.38    | 0.9     | 1.69    | RNF219       | ring finger protein 219                                               | chr13                                                      | protein_coding |                |
| ENSG00000100767.14 | -1.4523276 | 3.94866371 | 1.08E-06   | 6.18E-06    | 3.42    | 2.59    | 1.62    | 1.3     | PAPLN        | papilin, proteoglycan-like sulfated glycoprotein                      | chr14                                                      | protein_coding |                |
| ENSG00000270419.1  | 1.75172234 | 0.5197396  | 4.18E-06   | 2.18E-05    | 0.93    | 0.22    | 3.5     | 1.73    | CAHML        | colicin adenocarcinoma hypermethylated iron-protein coding            | chr6                                                       | lncRNA         |                |
| ENSG00000108671.13 | -6.7729581 | -2.0122722 | 3.73E-07   | 2.30E-06    | 0.06    | 0.25    | 0       | 0       | SERPINE3     | serpin peptidase inhibitor, clade B (ovalbumin), member 3             | chr18                                                      | protein_coding |                |
| ENSG00000210082.2  | 1.96191538 | 12.8009132 | 2.48E-11   | 2.66E-10    | 1250.18 | 1783.01 | 8719.44 | 6947.33 | MT-RNR2      | mitochondrially encoded 16S rRNA                                      | chr18                                                      | lncRNA         |                |
| ENSG00000156802.2  | -4.8292891 | -1.7638928 | 3.95E-07   | 2.45E-06    | 0.12    | 0.09    | 0.01    | 0       | 0            | 0                                                                     | ...                                                        | chr18          | protein_coding |
| ENSG00000139354.9  | 1.9931097  | -1.5909308 | 0.00345484 | 0.01003143  | 0.05    | 0       | 0.89    | 0.19    | GAS2L3       | growth arrest-specific 2 like 3                                       | chr12                                                      | protein_coding |                |
| ENSG00000137168.13 | -1.2153627 | 6.21421024 | 2.74E-05   | 0.0012274   | 13.89   | 14.27   | 8.92    | 7.21    | KOPF4        | forkhead box F4                                                       | chr12                                                      | protein_coding |                |
| ENSG00000156802.2  | -4.8292891 | -1.7638928 | 3.95E-07   | 2.45E-06    | 0.12    | 0.09    | 0.01    | 0       | 0            | 0                                                                     | ...                                                        | chr15          | antisense      |
| ENSG00000131126.17 | 1.9731543  | 0.55816501 | 4.53E-07   | 2.76E-06    | 0.36    | 0.22    | 1.98    | 1.06    | TEX101       | testis expressed 101                                                  | chr19                                                      | protein_coding |                |
| ENSG0000012802.8   | -5.9645797 | -0.7944111 | 2.81E-15   | 4.60E-14    | 0.3     | 0.16    | 0.01    | 0       | 0            | SMO                                                                   | smoothed, frizzled class receptor                          | chr7           | protein_coding |
| ENSG00000166394.13 | 2.0253797  | -2.562096  | 1.45E-10   | 1.37E-09    | 4.97    | 5.4     | 1.71    | 0.98    | C12ORF2      | cytochrome B5 reductase 2                                             | chr1                                                       | protein_coding |                |
| ENSG00000155758.11 | -1.1549502 | 8.1897422  | 5.98E-05   | 0.00025171  | 116.25  | 105.61  | 61.03   | 72.06   | ODC1         | ornithine decarboxylase 1                                             | chr2                                                       | protein_coding |                |
| ENSG0000015941.18  | 3.1774214  | -0.4784703 | 7.64E-11   | 7.77E-10    | 0.03    | 0       | 0.15    | 0.43    | MDM2         | regulator of microtubule dynamics 2                                   | chr2                                                       | protein_coding |                |
| ENSG00000133026.11 | 2.6546984  | 5.8474139  | 2.45E-18   | 5.19E-17    | 1.51    | 1.78    | 12.81   | 14.8    | MYH10        | myosin, heavy chain 10, non-muscle                                    | chr17                                                      | protein_coding |                |
| ENSG00000767549.4  | -1.775735  | -2.081061  | 0.02053181 | 0.0484221   | 0.16    | 0.02    | 0.03    | 0.04    | AC006136.17  | ...                                                                   | chr19                                                      | antisense      |                |
| ENSG00000130383.8  | -1.8985101 | 1.0686112  | 2.11E-08   | 8.94E-07    | 1.06    | 1.36    | 0.33    | 0.38    | GOT1         | growth differentiation factor 1                                       | chr19                                                      | protein_coding |                |
| ENSG0000018536.13  | -1.1134922 | 4.81678876 | 0.001322   | 0.00051953  | 14.37   | 11.25   | 8.2     | 7.58    | MAPK11       | mitogen-activated protein kinase 11                                   | chr22                                                      | protein_coding |                |
| ENSG0000076782.2   | -2.7353283 | -2.5717591 | 0.0191236  | 0.03011315  | 0.12    | 0.03    | 0.03    | 0       | 0            | 0                                                                     | ...                                                        | chr20          | antisense      |
| ENSG0000015996.6   | 1.0357914  | 3.9893918  | 0.0050205  | 0.001744703 | 4.22    | 4.16    | 2.71    | 3.38    | TMEM485      | transmembrane protein 69                                              | chr19                                                      | protein_coding |                |
| ENSG00000146484.12 | 1.63171395 | 0.34388791 | 2.97E-05   | 0.00013206  | 0.05    | 0.02    | 0.02    | 0.14    | ZNF704       | zinc finger protein 704                                               | chr1                                                       | protein_coding |                |
| ENSG00000172805.14 | 2.1733815  | 2.2638132  | 1.73E-11   | 1.13E-10    | 0.4     | 0.26    | 0.42    | 1.38    | HAP1         | huntingtin-associated protein 1                                       | chr17                                                      | protein_coding |                |
| ENSG0000014256.4   | -1.5589993 | 7.9922202  | 9.07E-08   | 6.11E-07    | 38.4    | 39.8    | 19.9    | 181.77  | PFND2        | proteofin subunit 2                                                   | chr1                                                       | protein_coding |                |
| ENSG00000141213.9  | 2.39165868 | 0.211281   | 8.86E-10   | 7.81E-09    | 0.1     | 0.09    | 0.41    | 0.92    | ULFI         | UFMI-specific ligase 1                                                | chr6                                                       | protein_coding |                |
| ENSG00000143431.18 | 0.64651017 | 0.00061017 | 0.00061017 | 0.00061017  | 0.06    | 0.38    | 0.69    | 0.53    | UREC2W       | uracil-conjugating enzyme E2W (putative)                              | chr6                                                       | protein_coding |                |
| ENSG00000154832.11 | 5.7068129  | -6.758978  | 0.0086564  | 0.0028128   | 0       | 0       | 0.03    | 0.05    | SLC25A48     | solute carrier family 25, member 48                                   | chr11                                                      | protein_coding |                |
| ENSG00000188407.10 | -3.7887629 | -2.5306308 | 0.001221   | 0.0036442   | 0.12    | 0       | 0.01    | 0       | 0            | 0                                                                     | ...                                                        | chr11          | protein_coding |
| ENSG00000125511.6  | 1.3420993  | 2.64236169 | 8.01E-07   | 4.45E-06    | 0.1     | 0.05    | 0.14    | 0.01    | CCND3-IT5    | cyclin D3, intron 5                                                   | chr12                                                      | antisense      |                |
| ENSG00000107485.14 | 9.007271   | 2.45654538 | 5.73E-10   | 7.80E-48    | 0       | 0.01    | 3.36    | 4.15    | GATA3        | GATA binding factor 3                                                 | chr10                                                      | protein_coding |                |
| ENSG00000213402.2  | 1.5670203  | -0.867657  | 0.0027107  | 0.00661139  | 0.17    | 0.13    | 0.57    | 0.61    | PTPRCAP      | protein tyrosine phosphatase, receptor type, C-associated protein     | chr11                                                      | protein_coding |                |
| ENSG00000163421.7  | 4.5316131  | -1.2655328 | 7.65E-11   | 7.77E-10    | 0.4     | 0.26    | 0.42    | 0.73    | PRKAC2       | protein kinase C, alpha 2                                             | chr10                                                      | protein_coding |                |
| ENSG00000235990.6  | -2.942967  | -1.2748499 | 7.05E-06   | 3.52E-05    | 0.19    | 0.1     | 0.05    | 0       | GNAS-AS1     | GNAS antisense RNA 1                                                  | chr20                                                      | antisense      |                |
| ENSG00000147496.5  | 5.53794007 | 0.86030432 | 1.41E-24   | 4.72E-23    | 0.01    | 0.01    | 0.05    | 0.94    | SLC22A1      | solute carrier family 21 (facilitated glucose transporter), member 10 | chr20                                                      | protein_coding |                |
| ENSG00000124700.3  | 2.12574568 | -1.4851705 | 0.0008662  | 0.00288921  | 0.01    | 0.05    | 0.14    | 0.12    | DNAC1        | DNAC1 antisense RNA 1 (head to head)                                  | chr1                                                       | protein_coding |                |
| ENSG00000101306.9  | 2.52626    | 0.5459668  | 6.22E-10   | 5.58E-09    | 0.14    | 0.08    | 0.06    | 0.66    | MYK2         | myosin light chain kinase 2                                           | chr20                                                      | protein_coding |                |
| ENSG00000274102.2  | 2.2691012  | -1.2116171 | 0.0001029  | 0.0014331   | 0.25    | 0.07    | 0.12    | 0.07    | HSTH20B      | histone cluster 2, H20B                                               | chr1                                                       | protein_coding |                |
| ENSG0000028789.1   | -1.6444443 | 0.65881732 | 1.08E-10   | 5.9E-05     | 1.21    | 1.02    | 1.06    | 0.35    | PAGR1        | PAGP1 associated glutamate-rich protein                               | chr16                                                      | protein_coding |                |
| ENSG0000027591.4   | -4.713192  | -1.841575  | 1.01E-06   | 5.80E-06    | 0.73    | 0.83    | 0.07    | 0       | RP11-280J1.1 | ...                                                                   | chr1                                                       | antisense      |                |
| ENSG0000025302.5   | 1.5429393  | 2.64236169 | 8.01E-07   | 4.45E-06    | 0.1     | 0.05    | 0.14    | 0.01    | SNAC         | sorting nexin 2                                                       | chr1                                                       | protein_coding |                |
| ENSG00000137710.13 | 1.76520139 | 4.36194012 | 3.74E-09   | 3.05E-08    | 1.07    | 1.64    | 5.41    | 7.84    | RDX          | radixin                                                               | chr11                                                      | protein_coding |                |
| ENSG00000169858.8  | -2.2571974 | -1.3180587 | 7.72E-05   | 0.00301861  | 0.39    | 0.49    | 0.06    | 0.17    | CALML6       | calmodulin-like 6                                                     | chr1                                                       | protein_coding |                |
| ENSG0000028989.1   | 1.9407784  | 1.4451036  | 0.0016375  | 0.00571218  | 0.01    | 0.05    | 0.14    | 3.44    | AL448012.1   | ...                                                                   | chr1                                                       | antisense      |                |
| ENSG00000137393.9  | 1.55198089 | -0.1757005 | 0.00025876 | 0.00059587  | 0.07    | 0.06    | 0.27    | 0.25    | RNF144B      | ring finger protein 144B                                              | chr19                                                      | protein_coding |                |
| ENSG00000125753.12 | -1.0259932 | 6.32484089 | 0.0003118  | 0.0129866   | 154.08  | 147.81  | 106.92  | 90.51   | VAPB         | vaccinostat-1-stimulated phospholipase                                | chr19                                                      | protein_coding |                |
| ENSG00000244719.5  | 1.4352029  | 1.4352029  | 1.03E-06   | 5.33E-05    | 0.01    | 0.05    | 0.14    | 0.12    | CR2AL1-AS1   | CR2AL1 antisense RNA 1                                                | chr1                                                       | antisense      |                |
| ENSG0000027446.1   | 2.26245794 | -2.5331601 | 0.01923175 | 0.0458365   | 0       | 0.15    | 0.58    | 0.44    | CTB-39C8.2   | ...                                                                   | chr17                                                      | lncRNA         |                |
| ENSG00000159478.1  | 1.9569862  | 1.3187015  | 0.0001029  | 0.0014331   | 0.25    | 0.07    | 0.12    | 0.07    | RNF148       | ring finger protein 148, RBB E3 ubiquitin protein ligase              | chr1                                                       | protein_coding |                |
| ENSG00000116285.11 | -1.1056877 | 5.44443768 | 0.00012467 | 0.00052644  | 11.08   | 12.01   | 5.27    | 1.91    | ERRF1        | ERRB receptor feedback inhibitor 1                                    | chr1                                                       | protein_coding |                |
| ENSG00000166165.11 | -1.3930342 | 8.221267   | 1.48E-06   | 8.31E-06    | 22.58   | 183.55  | 106.13  | 101.5   | OKB          | okadaic kinase, brain                                                 | chr14                                                      | protein_coding |                |
| ENSG00000607338.4  | 1.924204   | 0.7687298  | 5.19E-07   | 4.45E-06    | 0.1     | 0.05    | 0.14    | 0.01    | CTC1         | catenin cell-line, spermatogenesis-associated 1                       | chr19                                                      | protein_coding |                |
| ENSG00000175449.12 | -1.5530261 | -1.0053764 | 0.0016616  | 0.0051962   | 0.18    | 0.1     | 0.03    | 0.09    | RFE5D        | Rieske (Fe-S) domain containing                                       | chr5                                                       | protein_coding |                |
| ENSG0000018046.13  | -6.6597623 | 1.15029169 | 1.36E-29   | 6.06E-28    | 1.11    | 1.14    | 0.05    | 0.01    | STKL1        | serine/threonine kinase 11                                            | chr19                                                      | protein_coding |                |
| ENSG00000181096.6  | -2.08208   | 0.89201041 | 0.0001769  | 0.00046058  | 0.22    | 0.07    | 0.12    | 0.19    | RP11-69E11   | ...                                                                   | chr19                                                      | antisense      |                |
| ENSG00000185222.7  | 2.1806773  | 4.79292652 | 3.09E-05   | 0.00137039  | 9.35    | 15.26   | 29.52   | 46.98   | WBP5         | WW domain binding protein 5                                           | chr1                                                       | protein_coding |                |
| ENSG00000176334.1  | 5.8610649  | -2.422601  | 6.38E-05   | 0.00304052  | 0       | 0       | 0.18    | 0.15    | KL132433.1   | ...                                                                   | chr2                                                       | antisense      |                |
| ENSG00000131801.1  | 1.0250423  | -0.7782929 | 0.0011158  | 0.00480468  | 0.22    | 0.07    | 0.12    | 0.23    | RP11-307C1.1 | ...                                                                   | chr2                                                       | antisense      |                |
| ENSG00000186260.15 | 2.2275118  | 2.3230839  | 1.17E-11   | 1.31E-10    | 0.11    | 0.16    | 0.79    | 0.91    | MMK2         | MMK/myocardin-like 2                                                  | chr16                                                      | protein_coding |                |
| ENSG00000180259.1  | 1.3640056  | 0.349306   | 1.33E-14   | 2.05E-13    | 0.02    | 0.02    | 0.2     | 0.02    | CNTF2        | cytokine 12                                                           | chr2                                                       | protein_coding |                |
| ENSG0000013066.15  | 1.1959904  | 2.9887754  | 2.77E-08   | 2.00E-07    | 15.75   | 19.67   | 6.81    | 77.54   | SP1          | serum-inducible/perlemin N1-acetyltransferase 1                       | chr2                                                       | protein_coding |                |
| ENSG0000054938.14  | -3.3180827 | -2.7845174 | 0.00943894 | 0.02469931  | 0.07    | 0.07    | 0.02    | 0       | CHORDL2      | chordin-like 2                                                        | chr11                                                      | protein_coding |                |
| ENSG00000165282.12 | 1.5429393  | 2.64236169 | 8.01E-07   | 4.45E-06    | 0.1     | 0.05    | 0.14    | 0.01    | PGC          | phosphatidylinositol glycan anchor biosynthesis, class O              | chr1                                                       | protein_coding |                |
| ENSG00000129673.8  | 6.19483651 | -2.260378  | 2.70E-05   | 0.00012094  | 0       | 0       | 0.15    | 0.13    | ANAT1        | aralkylamine N-acetyltransferase                                      | chr17                                                      | protein_coding |                |
| ENSG00000155111.13 | 1.5772844  | 1.48529333 | 3.30E-06   | 1.75E-05    | 0.2     | 0.14    | 0.62    | 0.75    | CKD19        | cyclin-dependent kinase 19                                            | chr17                                                      | protein_coding |                |
| ENSG0000015937.15  | 1.3157969  | 1.5465521  | 1.17E-16   | 1.6E-15     | 0.03    | 0.03    | 0.16    | 0.18    | CNTN1        | contactin 1                                                           | chr6                                                       | protein_coding |                |
| ENSG00000180443.12 | 2.2680138  | 1.9934795  | 2.11E-11   | 2.27E-10    | 0.15    | 0.23    | 0.89    | 1.58    | RPS5K81      | ribosomal protein S6 kinase, 70kDa, polypeptide 1                     | chr17                                                      | protein_coding |                |
| ENSG00000102871.14 | 1.6618016  | 4.6551228  | 2.15E-08   | 1.57E-07    | 4.2     | 3.69    | 16.96   | 16.3    | TRADD        | TNFRSF1A-associated via death domain                                  | chr16                                                      | protein_coding |                |
| ENSG00000166302.8  | 1.7056862  | 0.0031768  | 0.0013465  | 0.0013465   | 0.1     | 0.05    | 0.14    | 0       |              |                                                                       |                                                            |                |                |

|                    |            |            |            |            |         |         |        |         |              |                                                                                                |       |                |
|--------------------|------------|------------|------------|------------|---------|---------|--------|---------|--------------|------------------------------------------------------------------------------------------------|-------|----------------|
| ENSG00000269992.1  | 2.16090096 | -0.1070556 | 1.50E-06   | 8.40E-06   | 0.5     | 0.11    | 1.59   | 209     | DOCK9-AS2    | DOCK9 antisense RNA 2 (head to head)                                                           | chr13 | antisense      |
| ENSG00000271181.1  | 2.9867793  | -1.0564155 | 1.05E-05   | 1.05E-05   | 0       | 0       | 0      | 157     | SHOXC1D      | small nuclear RNA C/D box 14D                                                                  | chr1  | snoRNA         |
| ENSG00000184178.14 | -1.3578484 | 3.3653342  | 6.78E-06   | 3.40E-05   | 3.97    | 3.54    | 213    | 177     | SCDF2        | sect family domain containing 2                                                                | chr1  | protein_coding |
| ENSG00000196922.12 | -2.636377  | 7.94592025 | 2.44E-18   | 5.19E-17   | 155.96  | 152.92  | 3359   | 3256    | PDLIM7       | PDC and LIM domain 7 (enigma)                                                                  | chr5  | protein_coding |
| ENSG00000135636.13 | 1.6189071  | 0.8393344  | 8.29E-08   | 5.60E-07   | 0.09    | 0.19    | 7.7    | 119     | 7.7 Mar      | measurine-associated ring finger (C3HC4) 7, E3 ubiquitin protein ligase                        | chr2  | protein_coding |
| ENSG00000077232.15 | 1.03918286 | 2.8493321  | 0.00064935 | 0.0022439  | 0.18    | 0.18    | 0.29   | 0.7     | DNAC10J      | DnaH (Hsp40) homolog, subfamily C, member 10                                                   | chr2  | protein_coding |
| ENSG00000110888.10 | 2.45987292 | -1.2578639 | 7.72E-05   | 0.00031861 | 0.03    | 0.03    | 0.15   | 0.26    | KOT1         | nucleolar transport factor 2-like export factor 2                                              | chrX  | protein_coding |
| ENSG00000273045.4  | 4.93279224 | -0.5394703 | 7.54E-13   | 9.57E-12   | 0.03    | 0       | 0.36   | 0.10    | SCZC55       | suppressor of cytokine signaling 5                                                             | chr2  | protein_coding |
| ENSG00000198168.17 | -6.6914892 | -0.1167396 | 1.86E-21   | 1.03E-20   | 0.38    | 0.26    | 0.01   | 1.03    | C20r15       | chromosome 2 open reading frame 15                                                             | chr2  | protein_coding |
| ENSG0000027144.1   | 1.97446496 | -2.148021  | 8.30E-05   | 0.0004362  | 0.14    | 0.09    | 0.14   | 0.0     | SWP          | small VCP/3P1-interacting protein                                                              | chr19 | protein_coding |
| ENSG0000027037.1   | 3.70150404 | -0.7582994 | 5.21E-08   | 3.63E-07   | 0.06    | 0.13    | 1.05   | 1.24    | AC005757.7   | --                                                                                             | chr11 | lncRNA         |
| ENSG00000158944.14 | 1.74141    | 0.2051773  | 1.11E-05   | 1.36E-05   | 0.36    | 0.16    | 0.08   | 0.12    | ELMO1        | engulfment and cell motility 1                                                                 | chr7  | protein_coding |
| ENSG00000175066.14 | 2.70563334 | 1.83762138 | 1.95E-14   | 2.94E-13   | 0.08    | 0.07    | 0.54   | 0.78    | GKS          | glycerol kinase 5 (putative)                                                                   | chr17 | protein_coding |
| ENSG00000278053.3  | 2.75656975 | 2.68277077 | 1.12E-16   | 2.08E-15   | 0.14    | 0.28    | 1.43   | 2.31    | DDX52        | DEAD (Asp-Glu-Ala-Asp) box polypeptide 52                                                      | chr17 | protein_coding |
| ENSG00000166908.16 | 1.23440877 | 4.95242021 | 2.35E-10   | 0.00103665 | 4.4     | 4.94    | 1474   | 1454    | PRKACG       | cholesterol 4-phosphate 4-kinase, type II, gamma                                               | chr12 | protein_coding |
| ENSG0000014755.16  | -1.1667677 | 2.61578223 | 1.05E-55   | 2.11E-53   | 1.41    | 1.68    | 0      | 0       | IKSF1        | immunoglobulin superfamily, member 1                                                           | chr10 | protein_coding |
| ENSG00000059282.8  | -2.8378863 | 1.07013999 | 4.53E-14   | 6.55E-13   | 1.87    | 1.62    | 0.21   | 0.43    | TSFAN15      | tetraspanin 15                                                                                 | chr10 | protein_coding |
| ENSG00000170495.15 | -2.4137204 | 6.4294231  | 8.73E-16   | 1.49E-14   | 17.3    | 31.25   | 7.18   | 7.46    | NPA52        | neuronal PAS domain protein 2                                                                  | chr2  | protein_coding |
| ENSG00000260460.1  | 1.91686402 | -1.3062033 | 0.00103764 | 0.00339765 | 0.03    | 0.09    | 0.4    | 0.22    | RP11-28472.1 | --                                                                                             | chr1  | lncRNA         |
| ENSG00000134013.14 | -1.4093555 | 0.06452017 | 1.12E-06   | 6.59E-06   | 94.77   | 82.59   | 43.38  | 45.67   | LXK12        | lysyl oxidase-like-2                                                                           | chr1  | protein_coding |
| ENSG00000278972.1  | 1.6493589  | -1.5944372 | 0.00031209 | 0.00109895 | 0.1     | 0.04    | 0.41   | 0.8     | RP11-83820   | --                                                                                             | chr2  | TES            |
| ENSG00000063660.7  | -1.3251812 | 8.54367236 | 4.47E-06   | 2.32E-05   | 106.57  | 109.56  | 58.76  | 56.06   | GPCI         | glycopin 1                                                                                     | chr2  | protein_coding |
| ENSG00000204175.5  | 5.4192981  | 0.74283061 | 4.05E-24   | 1.30E-22   | 0.05    | 0       | 1.99   | 1.37    | GRNBP        | G protein regulated inducer of neurite outgrowth 2                                             | chr10 | protein_coding |
| ENSG00000270768.1  | -6.840389  | -2.111198  | 1.05E-06   | 1.02E-06   | 0.71    | 0.35    | 0      | 0       | RP11-51402   | --                                                                                             | chr16 | lncRNA         |
| ENSG00000060602.12 | -1.0951364 | 0.07956515 | 0.00016361 | 0.0002695  | 7.1     | 7.28    | 47.7   | 4.17    | MAP3K14      | mitogen-activated protein kinase kinase kinase 14                                              | chr17 | protein_coding |
| ENSG00000204010.13 | -1.9996032 | 2.4626993  | 9.25E-10   | 4.07E-09   | 1.83    | 1.59    | 0.71   | 0.43    | MSH5         | mutL homolog 5                                                                                 | chr6  | protein_coding |
| ENSG00000223296.2  | -1.8535146 | 2.13109256 | 8.22E-09   | 6.38E-08   | 2.31    | 2.45    | 0.76   | 0.99    | RP11-13408   | --                                                                                             | chr1  | lncRNA         |
| ENSG00000255284.1  | 1.0288388  | 3.0880778  | 0.0005283  | 0.0022374  | 4.96    | 6.78    | 1491   | 17.02   | ARPO6621.5   | --                                                                                             | chr11 | lncRNA         |
| ENSG00000186314.10 | 1.6546114  | 1.6638398  | 5.30E-07   | 1.39E-06   | 0.77    | 0.89    | 0.34   | 5.33    | PREL2D       | PREL domain containing 2                                                                       | chr1  | protein_coding |
| ENSG00000177785.5  | -4.806998  | -3.2310842 | 0.0188973  | 0.0451957  | 0.09    | 0.1     | 0      | 0       | RPS-1061H2   | --                                                                                             | chr1  | lncRNA         |
| ENSG00000262160.1  | 2.2978513  | 0.9805934  | 1.28E-09   | 1.10E-08   | 0.12    | 0.27    | 1.92   | 1.2     | RP11-96011   | --                                                                                             | chr16 | antisense      |
| ENSG00000132965.8  | -2.866617  | -1.8552229 | 6.95E-05   | 0.0026029  | 0.05    | 0.49    | 1.05   | 0.04    | ALDH5A4      | arachidonate 5-epoxygenase-activating protein                                                  | chr17 | protein_coding |
| ENSG00000102418.18 | 1.6701016  | 2.89751832 | 1.45E-08   | 1.09E-07   | 0.32    | 0.37    | 1.34   | 1.8     | BRCA1        | breast cancer 1, early onset                                                                   | chr17 | protein_coding |
| ENSG00000266340.1  | 1.2129504  | 3.3819676  | 1.45E-06   | 6.15E-05   | 6.85    | 7.68    | 26.28  | 7.7     | RP11-34891   | --                                                                                             | chr17 | antisense      |
| ENSG00000279267.1  | 1.53172013 | -2.376992  | 0.0073705  | 0.01977594 | 0       | 0.03    | 0.05   | 0.17    | RP11-39514.1 | --                                                                                             | chr7  | TES            |
| ENSG00000178173.1  | 1.14873197 | 12.5701204 | 6.40E-05   | 0.00026805 | 3565.52 | 5402.28 | 141764 | 12204.9 | MT-CO2       | mitochondrially encoded cytochrome c oxidase II                                                | chrM  | protein_coding |
| ENSG00000166289.9  | 1.158      | 0.9        | 1.15E-09   | 1.15E-09   | 37.36   | 83.88   | 175.02 | 35.38   | NTSC2        | nucleolar protein domain containing 2                                                          | chr3  | protein_coding |
| ENSG00000266236.1  | 2.17473114 | -0.8451825 | 5.51E-05   | 0.00023313 | 0.1     | 0.26    | 0.87   | 1.31    | NARF-IT1     | NARF intron transcript 1                                                                       | chr1  | sense_intronic |
| ENSG0000013835.12  | -6.2507323 | 0.00331666 | 4.63E-49   | 6.00E-47   | 5.7     | 5.75    | 0.11   | 0.08    | GRTP1        | growth hormone regulated TBC protein 1                                                         | chr13 | protein_coding |
| ENSG0000013808.17  | -0.4627860 | -0.2133262 | 0.00010621 | 0.00042024 | 0.03    | 0.03    | 0.33   | 0.17    | DYNLC2       | dysferlin-2, light intermediate chain 1                                                        | chr17 | protein_coding |
| ENSG00000165695.7  | 3.00105428 | -0.653708  | 9.89E-08   | 6.64E-07   | 0.03    | 0.04    | 0.33   | 0.35    | TMEM52B      | transmembrane protein 52B                                                                      | chr12 | protein_coding |
| ENSG00000267750.4  | 3.28894056 | 0.0798892  | 7.26E-16   | 1.24E-14   | 0.02    | 0.08    | 0.71   | 0.71    | RUNC52A      | RUNC52A antisense RNA 1                                                                        | chr17 | antisense      |
| ENSG00000129888.8  | 2.05530135 | -0.0044629 | 9.69E-09   | 9.01E-09   | 1.81    | 1.81    | 2.74   | 2.74    | WRB          | WW domain binding protein 4                                                                    | chr1  | protein_coding |
| ENSG00000138327.6  | 2.87437899 | 0.7406019  | 2.71E-12   | 3.24E-11   | 0.3     | 0.18    | 2.03   | 2.7     | NKX2-8       | NK2 homeobox 8                                                                                 | chr14 | protein_coding |
| ENSG00000135255.17 | 1.49348474 | 3.6671946  | 6.75E-07   | 3.99E-06   | 0.74    | 1.23    | 34.7   | 3.91    | MAP7         | microtubule-associated protein 7                                                               | chr6  | protein_coding |
| ENSG00000107854.5  | 2.49549137 | -2.1450533 | 9.31E-18   | 1.20E-16   | 0.39    | 0.11    | 0.14   | 1.77    | THN52        | thymidine phosphorylase                                                                        | chr17 | protein_coding |
| ENSG00000255036.1  | -1.695041  | -0.821893  | 0.00063882 | 0.0021008  | 0.58    | 1.19    | 0.35   | 0.37    | RPS-901A1    | --                                                                                             | chr11 | antisense      |
| ENSG00000119313.14 | -0.612288  | 0.00063882 | 0.00063882 | 0.00063882 | 0.58    | 1.19    | 0.35   | 0.37    | FAH5B        | family with sequence similarity 65, member B                                                   | chr6  | protein_coding |
| ENSG00000258472.7  | 1.33947269 | -0.769634  | 0.0052073  | 0.0145648  | 0.58    | 0.33    | 1.57   | 1.55    | RP11-192H2   | --                                                                                             | chr17 | protein_coding |
| ENSG00000275023.3  | -1.3334565 | 6.76957379 | 4.15E-06   | 2.17E-05   | 13.71   | 13.24   | 7.26   | 6.99    | MLT6         | myelin/lymphoid or mixed-lineage leukemia (thritothor homolog, Drosophila); translocated to, 6 | chr17 | protein_coding |
| ENSG0000010723.11  | 1.05244753 | 1.1861623  | 0.00010631 | 0.00174357 | 1.15    | 1.33    | 3.3    | 3.41    | APB2         | apoptosis-inducing factor 2, beta 2 subunit                                                    | chr1  | protein_coding |
| ENSG00000186088.14 | 1.1163298  | -0.0581661 | 0.00515988 | 0.01445684 | 0.13    | 0.11    | 0.28   | 0.44    | GSAP         | gamma-secretase activating protein                                                             | chr7  | protein_coding |
| ENSG0000016062.13  | 2.21031293 | 0.07089174 | 1.53E-08   | 1.14E-07   | 0.02    | 0.1     | 0.37   | 0.38    | ZBTB8A       | zinc finger and BTB domain containing 8A                                                       | chr1  | protein_coding |
| ENSG00000204432.10 | 0.91709107 | -0.047867  | 0.0003461  | 0.0003461  | 0.6     | 0.6     | 0.6    | 0.43    | HLA-G        | major histocompatibility molecule, class I, G                                                  | chr1  | protein_coding |
| ENSG00000162845.5  | -2.5088014 | 1.65386249 | 3.24E-13   | 4.26E-12   | 1.67    | 1.82    | 0.27   | 0.54    | UNC00662     | long intergenic non-protein coding RNA 662                                                     | chr19 | lncRNA         |
| ENSG0000014498.14  | 2.16125998 | 1.49620681 | 7.64E-10   | 6.78E-09   | 0.01    | 0.49    | 0.01   | 0.09    | RP11-85021   | --                                                                                             | chr3  | antisense      |
| ENSG0000026668.2   | 4.4843127  | -0.0603858 | 0.0088873  | 0.04518507 | 0.02    | 0.02    | 0.11   | 0.02    | RP11-85021   | --                                                                                             | chr3  | protein_coding |
| ENSG00000270811.11 | 1.16101617 | 2.73907775 | 0.00020471 | 0.00071761 | 1.01    | 0.92    | 2.73   | 3.05    | ARHD10       | arabidopsis domain containing 10                                                               | chr3  | protein_coding |
| ENSG00000205708.11 | -2.5267108 | 0.00063882 | 0.00063882 | 0.00063882 | 0.58    | 1.19    | 0.35   | 0.37    | TM6P         | transmembrane protein 6                                                                        | chr22 | protein_coding |
| ENSG0000016418.12  | 4.09317207 | 0.87733154 | 9.78E-20   | 2.30E-18   | 0.04    | 0.03    | 0.41   | 1.22    | ELOVL7       | ELOVL fatty acid elongase 7                                                                    | chr1  | protein_coding |
| ENSG00000165812.12 | -2.5056469 | 8.8817     | 6.81E-17   | 1.28E-15   | 133.81  | 123.7   | 30.37  | 30.06   | NPPL1        | inositol polyphosphate phosphatase-like 1                                                      | chr11 | protein_coding |
| ENSG0000026530.17  | 2.79479523 | 0.00063882 | 0.00063882 | 0.00063882 | 0.58    | 1.19    | 0.35   | 0.37    | TM6P         | transmembrane protein 6                                                                        | chr22 | protein_coding |
| ENSG00000198951.9  | 4.0262491  | -0.3387744 | 6.69E-13   | 8.54E-12   | 0.02    | 0.02    | 0.51   | 0.68    | SCOC-AS1     | SCOC antisense RNA 1                                                                           | chr22 | antisense      |
| ENSG00000242096.11 | 1.1136148  | 1.7650573  | 0.00063882 | 0.0020931  | 0.04    | 0.05    | 0.14   | 0.12    | L22NC03-8    | --                                                                                             | chr22 | antisense      |
| ENSG0000019686.2   | 1.7694885  | 0.13303058 | 9.69E-09   | 9.01E-09   | 1.81    | 1.81    | 2.74   | 5.34    | HIST1H2A.D   | histone cluster 1, H2Ad                                                                        | chr6  | protein_coding |
| ENSG00000239764.4  | 5.37402558 | -2.796784  | 0.0018008  | 0.0049521  | 0       | 0       | 0.5    | 0       | RP11-347C1   | --                                                                                             | chr1  | sense_intronic |
| ENSG00000278493.1  | 2.02505507 | -1.570682  | 0.0013462  | 0.0053947  | 0.21    | 0.11    | 1.13   | 0.69    | CID-23825    | --                                                                                             | chr15 | sense_intronic |
| ENSG00000122884.11 | 1.9305721  | 2.6894807  | 1.18E-09   | 1.32E-08   | 0.09    | 0.08    | 0.8    | 1.65    | PCAT1        | lysophosphatidylglycerol acyltransferase 1                                                     | chr1  | protein_coding |
| ENSG0000018697.9   | 2.12875884 | -0.2726215 | 6.13E-06   | 3.10E-05   | 0.02    | 0.05    | 0.08   | 0.32    | YOD1         | YOD1 deubiquitinase                                                                            | chr1  | protein_coding |
| ENSG00000178917.13 | 1.0411646  | 0.31971962 | 0.071423   | 0.001084   | 0.37    | 0.26    | 0.62   | 1.1     | ZNF852       | zinc finger protein 852                                                                        | chr1  | protein_coding |
| ENSG0000016214.11  | 2.9479152  | -1.6464979 | 1.22E-20   | 3.07E-19   | 0.98    | 2.45    | 0.63   | 9.27    | ARHGAP1      | arrestin-like 1                                                                                | chr1  | protein_coding |
| ENSG00000272940.1  | 2.40484614 | -1.297247  | 0.00010901 | 0.00043503 | 0       | 0.38    | 1.29   | 1.4     | CTA-380B.1   | --                                                                                             | chr22 | lncRNA         |
| ENSG0000010162.11  | 1.7983262  | 3.2172972  | 9.69E-09   | 5.06E-08   | 1.53    | 1.53    | 2.73   | 2.84    | APL2         | alpha-fetoprotein transport 52                                                                 | chr1  | protein_coding |
| ENSG0000013604.10  | 1.30538726 | 2.63724078 | 2.45E-05   | 0.00010109 | 0.81    | 0.65    | 1.99   | 2.84    | APL2         | adaptor protein, phosphotyrosine interaction, PH domain and leucine zipper containing 2        | chr12 | protein_coding |
| ENSG0000018450.13  | 3.2589653  | 3.47247604 | 5.83E-23   | 1.73E-21   | 0.4     | 0.48    | 0.44   | 6.89    | PRCS1        | protein S (alpha)                                                                              | chr1  | protein_coding |
| ENSG0000014198.6   | 1.2812937  | 0.00063882 | 0.00063882 | 0.00063882 | 0.58    | 1.19    | 0.35   | 0.37    | FAH5B        | family with sequence similarity 65, member B                                                   | chr6  | protein_coding |
| ENSG0000017812.9   | 2.60543408 | -0.800620  | 1.47E-06   | 8.23E-06   | 0.03    | 0.01    | 0.25   | 0.14    | COL8A2       | collagen, type VIII, alpha 2                                                                   | chr1  | protein_coding |
| ENSG00000091844.6  | -2.874072  | -2.115349  | 0.0002626  | 0.0006399  | 0.04    | 0.03    | 0      | 0.01    | RGST1        | regulator of G protein signaling 17                                                            | chr6  | protein_coding |
| ENSG0000016578.9   | 1.624413   | 0.00063882 | 0.00063882 | 0.00063882 | 0.58    | 1.19    | 0.35   | 0.37    | BAC2         | BC12-associated ribonuclease 2                                                                 | chr1  | protein_coding |
| ENSG00000177692.10 | 5.65942674 | -2.6188299 | 0.0008564  | 0.00281128 | 0       | 0       | 0.01   | 0.14    | DNAC128      |                                                                                                |       |                |

ENSG00000158159 13277524 -0.694467 0.007404 0.0188438 0.01 0.04 0.03 0.12 TTC398 tetraatricopeptide repeat domain 398 chr9 chr6 protein coding  
ENSG00000158978 138823478 1.601354 0.000000 0.000000 0.00 0.00 0.00 0.00 ZNF597 zinc finger with UFM1-specific peptidase domain chr9 chr6 protein coding  
ENSG00000249731 2.26965688 -1.401502 0.0030738 0.0011156 0.29 0 1.03 -- 0.92 RP11-290C2 -- chr9 chr6 protein coding  
ENSG00000116789 -1.950743 6.9565508 9.62E-11 9.65E-10 140.11 102.05 45.94 40.18 C12orf57 chromosome 12 open reading frame 57 chr12 chr2 protein coding  
ENSG00000181151 0.00254492 0.000000 0.000000 0.000000 0.11 0.00 0.00 0.11 NPFT1 NPFT1 chr12 chr2 protein coding  
ENSG00000164066 2.19555074 1.2312383 2.52E-06 1.38E-05 0.02 0.01 0.09 0.11 NTU intrumen planar cell polarity protein chr9 chr6 protein coding  
ENSG00000183474 1.20239342 0.37354 0.0073632 0.0033979 0.08 0.28 0.5 0.58 GTP2HC GTP2H family member C chr9 chr6 protein coding  
ENSG00000157801 1.1239816 7.68981 6.01E-12 6.93E-11 0.11 0.00 0.00 0.11 MEGF11 multiple EGF-like domains 11 chr9 chr6 protein coding  
ENSG00000089314 1.39101035 4.5467081 2.38E-06 1.29E-05 1.9 1.86 4.68 8.57 LAMP2 lysosomal-associated membrane protein 2 chr9 chr6 protein coding  
ENSG00000251642 1.59466635 1.27710012 4.15E-06 2.13E-05 0.02 0.34 0 1.44 CNEP1R1 CTD nucleotide envelope phosphatase 1 regulatory subunit 1 chr16 chr6 protein coding  
ENSG00000115418 1.27710012 2.7589765 3.78E-14 3.78E-13 0.19 0.00 0.00 0.22 GLS glutamine chr9 chr6 protein coding  
ENSG00000202076 -1.6802572 5.2599359 1.13E-08 8.61E-08 7.58 8.2 3.16 14 UNC00094 long intergenic non-protein coding RNA 94 chr9 chr6 antisense  
ENSG00000122406 1.10749847 9.6797703 0.0031818 0.0008858 790.47 652.93 463.1 652.93 RPL5 ribosomal protein L5 chr9 chr6 protein coding  
ENSG00000137251 1.3713987 3.6925022 4.60E-06 2.39E-05 1.22 1.57 4.53 5.08 RPK1 receptor (NFRF5)-interacting serine-threonine kinase 1 chr9 chr6 protein coding  
ENSG00000298964 -1.4276022 1.8469975 1.05E-05 5.10E-05 4.13 4.74 1.95 243 UBE2F-SCLY UBE2F-SCLY readthrough (NMD candidate) chr9 chr6 protein coding  
ENSG00000257081 1.13963053 -0.2625081 0.0084451 0.0024049 0.14 0.03 0.62 0.69 RP11-830A3 chr9 chr11 antisense  
ENSG00000283011 -1.583424 2.632935 0.00327 0.00945156 0.1 0.22 0 0.03 RP11-32619 chr9 chr4 protein coding  
ENSG00000166692 2.77910848 0.0623533 9.12E-10 8.02E-09 0.06 0.04 0.18 0.18 KTFP2 activating transcription factor 7 interacting protein 2 chr16 chr6 protein coding  
ENSG00000257152 7.8448191 -1.482728 2.68E-09 2.31E-08 0 0 0.38 1.16 RP11-285S9 chr17 chr6 protein coding  
ENSG00000184524 -1.7038449 -1.8002674 1.87E-08 1.38E-07 0.24 0.24 0 0 CEND1 cell cycle exit and neuronal differentiation 1 chr11 chr6 protein coding  
ENSG00000102825 1.5386016 0.8204748 0.001994 0.0075551 0.22 0.16 0.5 0.78 LNS1 ceroid-lipofusinoses, neuronal 5 chr13 chr6 protein coding  
ENSG00000262978 2.0151897 1.19592524 1.89E-08 1.37E-07 0.09 0.09 0.37 0.59 GAP42C G patch domain containing 2 chr9 chr6 protein coding  
ENSG00000097765 -1.0306637 4.6345597 0.0040306 0.00143405 8.15 8.23 5.27 542 EFN81 chr9 chr6 protein coding  
ENSG00000067405 1.6665055 0.620521 1.81E-12 8.14E-12 0.71 0 0 0.03 RHEX44 Rho GTPase activating protein 44 chr9 chr6 protein coding  
ENSG00000275564 1.51974851 2.9869879 0.0539165 0.0148951 0.01 0.00 0.00 0.09 C7orf2-ZTF61.1 chr9 chr6 protein coding  
ENSG00000218739 1.2098717 2.6968114 8.76E-05 0.003551 0.85 0.73 2.19 2.71 CEP250 CEP250 opposite strand 6-phosphogluconolactonase chr9 chr6 protein coding  
ENSG00000130315 -1.2261647 5.6127992 3.35E-05 4.99E-05 63.61 45.38 30.6 29.19 PGLS chr19 chr6 protein coding  
ENSG00000282014 1.11370759 5.0641519 0.0012824 0.0005488 7.04 6.41 21.26 17.45 SMARCD3 SWI/SNF related, matrix associated, actin dependent regulator of chromatin, subfamily d, member 3 chr9 chr6 protein coding  
ENSG00000223652 1.34484043 -0.554212 0.0037991 0.0108967 0.24 0.31 0.88 0.96 AC106786.1 chr9 chr6 antisense  
ENSG00000235168 1.13963053 0.0367675 5.08E-15 9.32E-14 0.01 0.00 0.00 0.32 ANKRD1 A kinase (PKA) anchor protein 11 chr9 chr13 protein coding  
ENSG00000181315 2.11206372 0.8610803 1.91E-08 1.40E-07 0.16 0.04 0.38 0.81 ZNF322 zinc finger protein 322 chr9 chr13 protein coding  
ENSG00000167654 4.2377973 1.3295265 5.64E-23 1.68E-21 0.02 0.28 6.37 5.86 UBE2L lymphocyte anionin 6 complex, locus D chr9 chr6 protein coding  
ENSG00000185201 1.7931076 0.0326767 5.08E-15 9.32E-14 0.01 0.00 0.00 0.01 FBX222 chr9 chr6 protein coding  
ENSG00000205748 -8.0387861 -0.9567973 3.62E-14 5.28E-13 0.17 0.4 0 0 0 DENND1C DENND1/MAAD domain containing 1C chr9 chr6 protein coding  
ENSG00000264203 2.6121511 -2.2002001 0.001015 0.0035312 0.02 0.39 0.15 0.07 RP11-490C6 chr9 chr6 protein coding  
ENSG00000162401 1.65776338 3.3399767 0.0001593 0.00042485 0.57 0.39 0.39 1.52 UBE2A ubiquitin specific peptidase 2A chr9 chr6 protein coding  
ENSG00000174442 1.0 1.57976701 2.0349871 1.22E-06 6.90E-06 0.02 0.69 0.02 2.24 ZWILCH zinc knetochore protein chr15 chr6 protein coding  
ENSG00000181790 1.45265177 -1.177375 1.65E-11 1.77E-10 0.41 0.00 0.00 0.11 BAI1 chr9 chr16 protein coding  
ENSG00000280691 5.22761104 -2.8805399 0.0293522 0.00656312 0 0 0.12 0.02 CTD-2349P2 chr9 chr17 protein coding  
ENSG00000298583 3.30266834 1.1570932 4.58E-05 0.0019809 0 0 0.03 0.08 TRIM6-TRIM TRIM6-TRIM3 readthrough chr9 chr17 protein coding  
ENSG00000188925 3.1160711 1.83406 4.86E-06 3.32E-05 0.93 3.75 0.69 6.59 NCKX1 NaX adaptor (and transloc) release factor chr9 chr17 protein coding  
ENSG00000113575 7.42159991 1.2975784 1.18E-10 1.17E-09 0 0 0.07 0.14 PCDH12 protocadherin 12 chr9 chr6 protein coding  
ENSG00000164989 4.43397408 -1.2125842 6.30E-08 4.35E-07 0 0 0.06 0.09 CCLD171 coiled-coil domain containing 171 chr9 chr6 protein coding  
ENSG00000125566 1.4 1.9213659 1.69778472 3.92E-07 4.98E-07 39.23 34.57 14.6 21.17 PKM3 phosphotransferase, muscle chr9 chr12 protein coding  
ENSG00000150672 1.93544226 -1.6242536 0.0486779 0.01371541 0 0.01 0.02 0.06 DLG2 discs, large homologue 2 (Drosophila) chr11 chr6 protein coding  
ENSG00000135249 -1.1061817 4.41592243 0.001683 0.0061635 19.67 14.16 10.18 10.81 HUPDPA dyslexia inducible lipid droplet-associated chr9 chr6 protein coding  
ENSG00000144551 1.72681383 1.4225235 6.81E-04 5.21E-03 0.45 0.46 18.18 16.18 Drosophila homologue 1 chr9 chr6 protein coding  
ENSG00000216908 2.53802485 1.31108644 5.59E-12 6.25E-11 0.37 0.14 0.18 2.75 DEPDC7 DEP domain containing 7 chr9 chr11 protein coding  
ENSG00000105887 2.45347436 1.6821508 6.08E-07 3.32E-06 0.08 0.08 1.1 1.11 BAK1 BAK domain containing 1 chr9 chr14 protein coding  
ENSG00000175055 3.98475994 -1.3026739 1.50E-12 1.86E-11 0.01 0.03 0.15 0.5 ZNF654 zinc finger protein 654 chr9 chr14 protein coding  
ENSG00000179316 -3.5767996 4.1685046 5.68E-28 2.36E-26 10.71 11.24 10.7 1.38 FKX1 four jointed box 1 (Drosophila) chr11 chr6 protein coding  
ENSG00000133818 1.1 1.9213659 1.69778472 3.92E-07 4.98E-07 39.23 34.57 14.6 21.17 PKM3 phosphotransferase, muscle chr9 chr12 protein coding  
ENSG00000232653 4.44727833 -1.6872995 6.30E-07 3.74E-06 0.01 0 0.09 0.03 RGS5 regulator of G-protein signaling 5 chr9 chr15 protein coding  
ENSG00000143248 1.28099126 2.1473829 0.0035424 0.0102709 0.01 0 0.03 0.03 RGS5 regulator of G-protein signaling 5 chr9 chr15 protein coding  
ENSG0000019054 1.1757868 1.4663287 6.71E-13 8.96E-12 0.74 1.8 1.95 2.087 SPTLC1 small GTP-binding protein 1 chr9 chr17 protein coding  
ENSG00000259481 4.8894645 -0.062281 0.0188873 0.04519557 0 0 0.02 0.67 RP11-1079K -- chr9 chr17 antisense  
ENSG0000021584 1.54890786 -2.777825 0.0015808 0.0049521 0 0 0.63 0.11 RP11-853C4 -- chr9 chr17 protein coding  
ENSG0000022434 1.8402337 2.6170183 1.89E-08 1.04E-07 1.13 1.18 0.35 5.25 AC009815 chr9 chr17 protein coding  
ENSG00000217947 1.46949833 3.28925869 1.36E-06 7.64E-06 1.22 1.17 0.3 3.57 PTPN12 protein tyrosine phosphatase, non-receptor type 12 chr9 chr6 protein coding  
ENSG00000184513 1.50627327 2.21108 0.000000 0.000000 0 0 0.03 0.03 SUT3 chr9 chr6 protein coding  
ENSG00000169876 -1.5593799 4.2103673 8.74E-08 5.90E-07 12.18 16 6.75 56.5 AVEN apoptosis, caspase activation inhibitor chr9 chr15 protein coding  
ENSG00000154663 1.4459304 2.6465524 1.90E-29 8.88E-28 1.25 1.42 0.11 0.09 S9FRS2 SH3 domain containing ring finger 2 chr9 chr6 protein coding  
ENSG00000174945 1.2 1.9213659 1.69778472 3.92E-07 4.98E-07 39.23 34.57 14.6 21.17 PKM3 phosphotransferase, muscle chr9 chr12 protein coding  
ENSG00000154273 1.3186964 -1.94335 0.0001092 0.00041007 0.02 0 0.13 0.14 C4orf19 chromosome 4 open reading frame 19 chr9 chr13 protein coding  
ENSG00000138423 -1.046048 6.0244389 0.001283 0.0104967 9.48 10.66 55.1 7.53 CUL4A cullin 4A chr9 chr13 protein coding  
ENSG00000166446 1.8013468 1.5003334 3.19E-08 1.41E-07 0.75 0.75 1.98 1.98 STS suppression of tumorigenesis 5 chr9 chr6 protein coding  
ENSG00000154257 1.3028789 0.0270458 0.0082295 0.00276531 0.07 0.11 0.27 0.3 DCLRE1C DNA cross-link repair 1C chr9 chr6 protein coding  
ENSG0000014491 1.7979722 1.13247618 1.29E-35 7.86E-34 0.65 0.83 0 0.01 SLC26A9 solute carrier family 26 (anion exchanger), member 9 chr9 chr6 protein coding  
ENSG00000181516 1.50271958 1.19592524 1.89E-08 1.37E-07 0.09 0.09 0.37 0.59 GAP42C G patch domain containing 2 chr9 chr6 protein coding  
ENSG00000157801 1.1239816 7.68981 6.01E-12 6.93E-11 0.11 0.00 0.00 0.11 MEGF11 multiple EGF-like domains 11 chr9 chr6 protein coding  
ENSG00000183474 1.39101035 4.5467081 2.38E-06 1.29E-05 1.9 1.86 4.68 8.57 LAMP2 lysosomal-associated membrane protein 2 chr9 chr6 protein coding  
ENSG00000251642 1.59466635 1.27710012 4.15E-06 2.13E-05 0.02 0.34 0 1.44 CNEP1R1 CTD nucleotide envelope phosphatase 1 regulatory subunit 1 chr16 chr6 protein coding  
ENSG00000115418 1.27710012 2.7589765 3.78E-14 3.78E-13 0.19 0.00 0.00 0.22 GLS glutamine chr9 chr6 protein coding  
ENSG00000202076 -1.6802572 5.2599359 1.13E-08 8.61E-08 7.58 8.2 3.16 14 UNC00094 long intergenic non-protein coding RNA 94 chr9 chr6 antisense  
ENSG00000122406 1.10749847 9.6797703 0.0031818 0.0008858 790.47 652.93 463.1 652.93 RPL5 ribosomal protein L5 chr9 chr6 protein coding  
ENSG00000137251 1.3713987 3.6925022 4.60E-06 2.39E-05 1.22 1.57 4.53 5.08 RPK1 receptor (NFRF5)-interacting serine-threonine kinase 1 chr9 chr6 protein coding  
ENSG00000298964 -1.4276022 1.8469975 1.05E-05 5.10E-05 4.13 4.74 1.95 243 UBE2F-SCLY UBE2F-SCLY readthrough (NMD candidate) chr9 chr6 protein coding  
ENSG00000257081 1.13963053 -0.2625081 0.0084451 0.0024049 0.14 0.03 0.62 0.69 RP11-830A3 chr9 chr11 antisense  
ENSG00000283011 -1.583424 2.632935 0.00327 0.00945156 0.1 0.22 0 0.03 RP11-32619 chr9 chr4 protein coding  
ENSG00000166692 2.77910848 0.0623533 9.12E-10 8.02E-09 0.06 0.04 0.18 0.18 KTFP2 activating transcription factor 7 interacting protein 2 chr16 chr6 protein coding  
ENSG00000257152 7.8448191 -1.482728 2.68E-09 2.31E-08 0 0 0.38 1.16 RP11-285S9 chr17 chr6 protein coding  
ENSG00000184524 -1.7038449 -1.8002674 1.87E-08 1.38E-07 0.24 0.24 0 0 CEND1 cell cycle exit and neuronal differentiation 1 chr11 chr6 protein coding  
ENSG00000102825 1.5386016 0.8204748 0.001994 0.0075551 0.22 0.16 0.5 0.78 LNS1 ceroid-lipofusinoses, neuronal 5 chr13 chr6 protein coding  
ENSG00000262978 2.0151897 1.19592524 1.89E-08 1.37E-07 0.09 0.09 0.37 0.59 GAP42C G patch domain containing 2 chr9 chr6 protein coding  
ENSG00000097765 -1.0306637 4.6345597 0.0040306 0.00143405 8.15 8.23 5.27 542 EFN81 chr9 chr6 protein coding  
ENSG00000067405 1.6665055 0.620521 1.81E-12 8.14E-12 0.71 0 0 0.03 RHEX44 Rho GTPase activating protein 44 chr9 chr6 protein coding  
ENSG00000275564 1.51974851 2.9869879 0.0539165 0.0148951 0.01 0.00 0.00 0.09 C7orf2-ZTF61.1 chr9 chr6 protein coding  
ENSG00000218739 1.2098717 2.6968114 8.76E-05 0.003551 0.85 0.73 2.19 2.71 CEP250 CEP250 opposite strand 6-phosphogluconolactonase chr9 chr6 protein coding  
ENSG00000130315 -1.2261647 5.6127992 3.35E-05 4.99E-05 63.61 45.38 30.6 29.19 PGLS chr19 chr6 protein coding  
ENSG00000282014 1.11370759 5.0641519 0.0012824 0.0005488 7.04 6.41 21.26 17.45 SMARCD3 SWI/SNF related, matrix associated, actin dependent regulator of chromatin, subfamily d, member 3 chr9 chr6 protein coding  
ENSG00000223652 1.34484043 -0.554212 0.0037991 0.0108967 0.24 0.31 0.88 0.96 AC106786.1 chr9 chr6 antisense  
ENSG00000235168 1.13963053 0.0367675 5.08E-15 9.32E-14 0.01 0.00 0.00 0.32 ANKRD1 A kinase (PKA) anchor protein 11 chr9 chr13 protein coding  
ENSG00000181315 2.11206372 0.8610803 1.91E-08 1.40E-07 0.16 0.04 0.38 0.81 ZNF322 zinc finger protein 322 chr9 chr13 protein coding  
ENSG00000167654 4.2377973 1.3295265 5.64E-23 1.68E-21 0.02 0.28 6.37 5.86 UBE2L lymphocyte anionin 6 complex, locus D chr9 chr6 protein coding  
ENSG00000185201 1.7931076 0.0326767 5.08E-15 9.32E-14 0.01 0.00 0.00 0.01 FBX222 chr9 chr6 protein coding  
ENSG00000205748 -8.0387861 -0.9567973 3.62E-14 5.28E-13 0.17 0.4 0 0 0 DENND1C DENND1/MAAD domain containing 1C chr9 chr6 protein coding  
ENSG00000264203 2.6121511 -2.2002001 0.001015 0.0035312 0.02 0.39 0.15 0.07 RP11-490C6 chr9 chr6 protein coding  
ENSG00000162401 1.65776338 3.3399767 0.0001593 0.00042485 0.57 0.39 0.39 1.52 UBE2A ubiquitin specific peptidase 2A chr9 chr6 protein coding  
ENSG00000174442 1.0 1.57976701 2.0349871 1.22E-06 6.90E-06 0.02 0.69 0.02 2.24 ZWILCH zinc knetochore protein chr15 chr6 protein coding  
ENSG00000181790 1.45265177 -1.177375 1.65E-11 1.77E-10 0.41 0.00 0.00 0.11 BAI1 chr9 chr16 protein coding  
ENSG00000280691 5.22761104 -2.8805399 0.0293522 0.00656312 0 0 0.12 0.02 CTD-2349P2 chr9 chr17 protein coding  
ENSG00000298583 3.30266834 1.1570932 4.58E-05 0.0019809 0 0 0.03 0.08 TRIM6-TRIM TRIM6-TRIM3 readthrough chr9 chr17 protein coding  
ENSG00000188925 3.1160711 1.83406 4.86E-06 3.32E-05 0.93 3.75 0.69 6.59 NCKX1 NaX adaptor (and transloc) release factor chr9 chr17 protein coding  
ENSG00000113575 7.42159991 1.2975784 1.18E-10 1.17E-09 0 0 0.07 0.14 PCDH12 protocadherin 12 chr9 chr6 protein coding  
ENSG00000164989 4.43397408 -1.2125842 6.30E-08 4.35E-07 0 0 0.06 0.09 CCLD171 coiled-coil domain containing 171 chr9 chr6 protein coding  
ENSG00000125566 1.4 1.9213659 1.69778472 3.92E-07 4.98E-07 39.23 34.57 14.6 21.17 PKM3 phosphotransferase, muscle chr9 chr12 protein coding  
ENSG00000150672 1.93544226 -1.6242536 0.0486779 0.01371541 0 0.01 0.02 0.06 DLG2 discs, large homologue 2 (Drosophila) chr11 chr6 protein coding  
ENSG00000135249 -1.1061817 4.41592243 0.001683 0.0061635 19.67 14.16 10.18 10.81 HUPDPA dyslexia inducible lipid droplet-associated chr9 chr6 protein coding  
ENSG00000144551 1.72681383 1.4225235 6.81E-04 5.21E-03 0.45 0.46 18.18 16.18 Drosophila homologue 1 chr9 chr6 protein coding  
ENSG00000216908 2.53802485 1.31108644 5.59E-12 6.25E-11 0.37 0.14 0.18 2.75 DEPDC7 DEP domain containing 7 chr9 chr11 protein coding  
ENSG00000105887 2.45347436 1.6821508 6.08E-07 3.32E-06 0.08 0.08 1.1 1.11 BAK1 BAK domain containing 1 chr9 chr14 protein coding  
ENSG00000175055 3.98475994 -1.3026739 1.50E-12 1.86E-11 0.01 0.03 0.15 0.5 ZNF654 zinc finger protein 654 chr9 chr14 protein coding  
ENSG00000179316 -3.5767996 4.1685046 5.68E-28 2.36E-26 10.71 11.24 10.7 1.38 FKX1 four jointed box 1 (Drosophila) chr11 chr6 protein coding  
ENSG00000133818 1.1 1.9213659 1.69778472 3.92E-07 4.98E-07 39.23 34.57 14.6 21.17 PKM3 phosphotransferase, muscle chr9 chr12 protein coding  
ENSG00000232653 4.44727833 -1.6872995 6.30E-07 3.74E-06 0.01 0 0.09 0.03 RGS5 regulator of G-protein signaling 5 chr9 chr15 protein coding  
ENSG00000143248 1.28099126 2.1473829 0.0035424 0.0102709 0.01 0 0.03 0.03 RGS5 regulator of G-protein signaling 5 chr9 chr15 protein coding  
ENSG0000019054 1.1757868 1.4663287 6.71E-13 8.96E-12 0.74 1.8 1.95 2.087 SPTLC1 small GTP-binding protein 1 chr9 chr17 protein coding  
ENSG00000259481 4.8894645 -0.062281 0.0188873 0.04519557 0 0 0.02 0.67 RP11-1079K -- chr9 chr17 antisense  
ENSG0000021584 1.54890786 -2.777825 0.0015808 0.0049521 0 0 0.63 0.11 RP11-853C4 -- chr9 chr17 protein coding  
ENSG0000022434 1.8402337 2.6170183 1.89E-08 1.04E-07 1.13 1.18 0.35 5.25 AC009815 chr9 chr17 protein coding  
ENSG00000217947 1.46949833 3.28925869 1.36E-06 7.64E-06 1.22 1.17 0.3 3.57 PTPN12 protein tyrosine phosphatase, non-receptor type 12 chr9 chr6 protein coding  
ENSG00000184513 1.50627327 2.21108 0.000000 0.000000 0 0 0.03 0.03 SUT3 chr9 chr6 protein coding  
ENSG00000169876 -1.5593799 4.2103673 8.74E-08 5.90E-07 12.18 16 6.75 56.5 AVEN apoptosis, caspase activation inhibitor chr9 chr15 protein coding  
ENSG00000154663 1.4459304 2.6465524 1.90E-29 8.88E-28 1.25 1.42 0.11 0.09 S9FRS2 SH3 domain containing ring finger 2 chr9 chr6 protein coding  
ENSG00000174945 1.2 1.9213659 1.69778472 3.92E-07 4.98E-07 39.23 34.57 14.6 21.17 PKM3 phosphotransferase, muscle chr9 chr12 protein coding  
ENSG00000154273 1.3186964 -1.94335 0.0001092 0.00041007 0.02 0 0.13 0.14 C4orf19 chromosome 4 open reading frame 19 chr9 chr13 protein coding  
ENSG00000138423 -1.046048 6.0244389 0.001283 0.0104967 9.48 10.66 55.1 7.53 CUL4A cullin 4A chr9 chr13 protein coding  
ENSG00000166446 1.8013468 1.5003334 3.19E-08 1.41E-07 0.75 0.75 1.98 1.98 STS suppression of tumorigenesis 5 chr9 chr6 protein coding  
ENSG00000154257 1.3028789 0.0270458 0.0082295 0.00276531 0.07 0.11 0.27 0.3 DCLRE1C DNA cross-link repair 1C chr9 chr6 protein coding  
ENSG0000014491 1.7979722 1.13247618 1.29E-35 7.86E-34 0.65 0.83 0 0.01 SLC26A9 solute carrier family 26 (anion exchanger), member 9 chr9 chr6 protein coding  
ENSG00000181516 1.50271958 1.19592524 1.89E-08 1.37E-07 0.09 0.09 0.37 0.59 GAP42C G patch domain containing 2 chr9 chr6 protein coding  
ENSG00000157801 1.1239816 7.68981 6.01E-12 6.93E-11 0.11 0.00 0.00 0.11 MEGF11 multiple EGF-like domains 11 chr9 chr6 protein coding  
ENSG00000183474 1.39101035 4.5467081 2.38E-06 1.29E-05 1.9 1.86 4.68 8.57 LAMP2 lysosomal-associated membrane protein 2 chr9 chr6 protein coding  
ENSG00000251642 1.59466635 1.27710012 4.15E-06 2.13E-05 0.02 0.34 0 1.44 CNEP1R1 CTD nucleotide envelope phosphatase 1 regulatory subunit 1 chr16 chr6 protein coding  
ENSG00000115418 1.27710012 2.7589765 3.78E-14 3.78E-13 0.19 0.00 0.00 0.22 GLS glutamine chr9 chr6 protein coding  
ENSG0000



|                    |            |            |           |           |       |       |       |       |              |                                                                                                        |      |                |
|--------------------|------------|------------|-----------|-----------|-------|-------|-------|-------|--------------|--------------------------------------------------------------------------------------------------------|------|----------------|
| ENSG00000213654.8  | -1.3301404 | -0.9929666 | 2.19E-09  | 1.59E-07  | 0.42  | 0.32  | 0.1   | 0     | GPM3G        | G-protein signaling modulator 3                                                                        | chr6 | protein_coding |
| ENSG00000219671.1  | -1.8012976 | 2.9417252  | 6.36E-09  | 5.02E-08  | 6.11  | 4.26  | 2.19  | 1.78  | RAB26        | RAB26, member RAS oncogene family                                                                      | chr6 | protein_coding |
| ENSG00000242911.7  | 1.2495770  | -1.2389254 | 3.89E-05  | 0.0016973 | 0.02  | 0.0   | 0.1   | 0.07  | ZNF773       | zinc finger protein 773                                                                                | chr6 | protein_coding |
| ENSG00000200584.7  | 1.0000000  | 1.3317486  | 1.00E-06  | 1.00E-06  | 0.44  | 0.19  | 0.44  | 0.09  | NBR22        | NBR22, member RAS oncogene family                                                                      | chr6 | protein_coding |
| ENSG00000216425.1  | 1.4212684  | 1.0401588  | 2.75E-22  | 7.87E-21  | 0.05  | 0.01  | 0.79  | 1.07  | STGAL6       | ST3 beta-galactoside alpha-2,3-sialyltransferase 6                                                     | chr6 | protein_coding |
| ENSG00000238660.10 | 1.7102993  | 0.5629845  | 7.26E-06  | 3.62E-05  | 0.17  | 0.2   | 0.02  | 0.18  | APLAF        | adaptor-related protein complex 1 associated regulatory protein, intergenic non-protein coding RNA 941 | chr6 | protein_coding |
| ENSG00000234344.3  | 1.3642487  | 1.2782206  | 2.02E-23  | 6.22E-22  | 1.62  | 1.8   | 0.29  | 0.08  | SPOCD1       | SPOC domain containing 1                                                                               | chr6 | protein_coding |
| ENSG00000236013.1  | 0.5352001  | 0.8006613  | 1.33E-09  | 1.73E-07  | 0.45  | 0.3   | 0.29  | 0.35  | SLC20A1      | solute carrier organic anion transporter family, member 2A1                                            | chr6 | protein_coding |
| ENSG00000242734.2  | 3.8825296  | 2.5310035  | 2.31E-26  | 8.73E-25  | 0.11  | 0.17  | 2.54  | 3.04  | RGAGA        | retrotransposon gag domain containing 4                                                                | chr6 | protein_coding |
| ENSG00000217702.14 | 6.4994354  | -0.2389672 | 1.78E-06  | 8.96E-06  | 0.0   | 0.003 | 0.05  | 0.03  | PROX1        | prosurin homeobox 1                                                                                    | chr6 | protein_coding |
| ENSG00000214111.13 | 2.7191191  | 0.204191   | 9.23E-17  | 3.04E-07  | 0.15  | 0.1   | 0.05  | 0.47  | ZNF187       | zinc finger protein 187                                                                                | chr6 | protein_coding |
| ENSG00000200492.6  | 1.3053641  | 4.3458442  | 9.49E-06  | 4.63E-05  | 1.43  | 1.44  | 0.49  | 4.76  | NTNT-AS1     | NTNT antisense RNA 1                                                                                   | chr6 | antisense      |
| ENSG00000219659.9  | -4.6674355 | -1.8110689 | 9.92E-10  | 8.71E-09  | 0.02  | 0.14  | 0.01  | 0.1   | CACNA1B      | calcium channel, voltage-dependent, T type, alpha 1H subunit                                           | chr6 | protein_coding |
| ENSG00000213919.13 | 1.0000000  | 1.3317486  | 1.00E-06  | 1.00E-06  | 0.44  | 0.19  | 0.44  | 0.09  | NBR22        | NBR22, member RAS oncogene family                                                                      | chr6 | protein_coding |
| ENSG00000217646.10 | -1.1103642 | 7.0624854  | 5.70E-05  | 0.0020446 | 61.35 | 56.41 | 36.29 | 33.87 | THAP4        | THAP domain containing 4                                                                               | chr6 | protein_coding |
| ENSG00000202836.05 | -1.2529606 | 1.3023222  | 0.0001231 | 0.0009926 | 0.59  | 0.78  | 0.43  | 0.35  | FAM156A      | family with sequence similarity 156, member A                                                          | chr6 | protein_coding |
| ENSG00000200284.1  | 1.7102993  | 0.5629845  | 7.26E-06  | 3.62E-05  | 0.17  | 0.2   | 0.02  | 0.18  | CTD-2047H1   | histone cluster 1, H20M                                                                                | chr6 | protein_coding |
| ENSG00000206883.1  | -1.3170003 | -2.8637184 | 0.0161562 | 0.0395166 | 0.12  | 0.27  | 0.06  | 0.1   | CTD-2047H1   | histone cluster 1, H20M                                                                                | chr6 | antisense      |
| ENSG00000213683.13 | 1.0859587  | 4.1161041  | 0.0002023 | 0.0008176 | 11.24 | 10.03 | 33.87 | 25.88 | NUTL1        | nucleotide diphosphate linked motif XI-type motif 14                                                   | chr6 | protein_coding |
| ENSG00000200766.11 | 1.7102993  | 0.5629845  | 7.26E-06  | 3.62E-05  | 0.17  | 0.2   | 0.02  | 0.18  | POLC3        | polynucleotide kinase                                                                                  | chr6 | protein_coding |
| ENSG00000218437.4  | 3.8666224  | 0.8907916  | 2.14E-08  | 4.56E-17  | 0.12  | 0.42  | 0.29  | 3.08  | HIST1H1B     | histone cluster 1, H1b                                                                                 | chr6 | protein_coding |
| ENSG00000200676.15 | 2.616209   | 0.0006564  | 0.0028018 | 0.0000000 | 0.02  | 0.0   | 0.0   | 0.21  | IL2A         | interleukin 12A                                                                                        | chr6 | protein_coding |
| ENSG00000217720.14 | 6.45521709 | -2.0709636 | 3.03E-06  | 1.62E-05  | 0.0   | 0.0   | 0.55  | 0.47  | RP11-10008-- | decaying pre-mRNA 2                                                                                    | chr6 | sense_intronic |
| ENSG00000217295.14 | 4.5613271  | 0.2529798  | 1.06E-17  | 2.12E-16  | 0.01  | 0.21  | 0.29  | 0.29  | CD92         | CD molecule and Src domain 3                                                                           | chr6 | protein_coding |
| ENSG00000200665.10 | 1.3261748  | 0.0014942  | 0.0007248 | 0.0000000 | 0.02  | 0.0   | 0.0   | 0.32  | EMX2         | EMX homeobox 2                                                                                         | chr6 | protein_coding |
| ENSG00000219671.1  | -1.2211648 | 4.9611598  | 2.20E-13  | 3.95E-12  | 0.33  | 12.47 | 3.99  | 3.47  | ANKRD138     | ankyrin repeat domain 138                                                                              | chr6 | protein_coding |
| ENSG00000210296.12 | -1.1913406 | 6.9984764  | 3.64E-05  | 0.0015978 | 27.29 | 25.09 | 16.6  | 16.26 | THCD5        | THCD domain 5                                                                                          | chr6 | protein_coding |
| ENSG00000200584.7  | 1.0000000  | 1.3317486  | 1.00E-06  | 1.00E-06  | 0.44  | 0.19  | 0.44  | 0.09  | NBR22        | NBR22, member RAS oncogene family                                                                      | chr6 | protein_coding |
| ENSG00000216425.1  | 1.4212684  | 1.0401588  | 2.75E-22  | 7.87E-21  | 0.05  | 0.01  | 0.79  | 1.07  | STGAL6       | ST3 beta-galactoside alpha-2,3-sialyltransferase 6                                                     | chr6 | protein_coding |
| ENSG00000238660.10 | 1.7102993  | 0.5629845  | 7.26E-06  | 3.62E-05  | 0.17  | 0.2   | 0.02  | 0.18  | APLAF        | adaptor-related protein complex 1 associated regulatory protein, intergenic non-protein coding RNA 941 | chr6 | protein_coding |
| ENSG00000234344.3  | 1.3642487  | 1.2782206  | 2.02E-23  | 6.22E-22  | 1.62  | 1.8   | 0.29  | 0.08  | SPOCD1       | SPOC domain containing 1                                                                               | chr6 | protein_coding |
| ENSG00000236013.1  | 0.5352001  | 0.8006613  | 1.33E-09  | 1.73E-07  | 0.45  | 0.3   | 0.29  | 0.35  | SLC20A1      | solute carrier organic anion transporter family, member 2A1                                            | chr6 | protein_coding |
| ENSG00000242734.2  | 3.8825296  | 2.5310035  | 2.31E-26  | 8.73E-25  | 0.11  | 0.17  | 2.54  | 3.04  | RGAGA        | retrotransposon gag domain containing 4                                                                | chr6 | protein_coding |
| ENSG00000217702.14 | 6.4994354  | -0.2389672 | 1.78E-06  | 8.96E-06  | 0.0   | 0.003 | 0.05  | 0.03  | PROX1        | prosurin homeobox 1                                                                                    | chr6 | protein_coding |
| ENSG00000214111.13 | 2.7191191  | 0.204191   | 9.23E-17  | 3.04E-07  | 0.15  | 0.1   | 0.05  | 0.47  | ZNF187       | zinc finger protein 187                                                                                | chr6 | protein_coding |
| ENSG00000200492.6  | 1.3053641  | 4.3458442  | 9.49E-06  | 4.63E-05  | 1.43  | 1.44  | 0.49  | 4.76  | NTNT-AS1     | NTNT antisense RNA 1                                                                                   | chr6 | antisense      |
| ENSG00000219659.9  | -4.6674355 | -1.8110689 | 9.92E-10  | 8.71E-09  | 0.02  | 0.14  | 0.01  | 0.1   | CACNA1B      | calcium channel, voltage-dependent, T type, alpha 1H subunit                                           | chr6 | protein_coding |
| ENSG00000213919.13 | 1.0000000  | 1.3317486  | 1.00E-06  | 1.00E-06  | 0.44  | 0.19  | 0.44  | 0.09  | NBR22        | NBR22, member RAS oncogene family                                                                      | chr6 | protein_coding |
| ENSG00000217646.10 | -1.1103642 | 7.0624854  | 5.70E-05  | 0.0020446 | 61.35 | 56.41 | 36.29 | 33.87 | THAP4        | THAP domain containing 4                                                                               | chr6 | protein_coding |
| ENSG00000202836.05 | -1.2529606 | 1.3023222  | 0.0001231 | 0.0009926 | 0.59  | 0.78  | 0.43  | 0.35  | FAM156A      | family with sequence similarity 156, member A                                                          | chr6 | protein_coding |
| ENSG00000200284.1  | 1.7102993  | 0.5629845  | 7.26E-06  | 3.62E-05  | 0.17  | 0.2   | 0.02  | 0.18  | CTD-2047H1   | histone cluster 1, H20M                                                                                | chr6 | protein_coding |
| ENSG00000206883.1  | -1.3170003 | -2.8637184 | 0.0161562 | 0.0395166 | 0.12  | 0.27  | 0.06  | 0.1   | CTD-2047H1   | histone cluster 1, H20M                                                                                | chr6 | antisense      |
| ENSG00000213683.13 | 1.0859587  | 4.1161041  | 0.0002023 | 0.0008176 | 11.24 | 10.03 | 33.87 | 25.88 | NUTL1        | nucleotide diphosphate linked motif XI-type motif 14                                                   | chr6 | protein_coding |
| ENSG00000200766.11 | 1.7102993  | 0.5629845  | 7.26E-06  | 3.62E-05  | 0.17  | 0.2   | 0.02  | 0.18  | POLC3        | polynucleotide kinase                                                                                  | chr6 | protein_coding |
| ENSG00000218437.4  | 3.8666224  | 0.8907916  | 2.14E-08  | 4.56E-17  | 0.12  | 0.42  | 0.29  | 3.08  | HIST1H1B     | histone cluster 1, H1b                                                                                 | chr6 | protein_coding |
| ENSG00000200676.15 | 2.616209   | 0.0006564  | 0.0028018 | 0.0000000 | 0.02  | 0.0   | 0.0   | 0.21  | IL2A         | interleukin 12A                                                                                        | chr6 | protein_coding |
| ENSG00000217720.14 | 6.45521709 | -2.0709636 | 3.03E-06  | 1.62E-05  | 0.0   | 0.0   | 0.55  | 0.47  | RP11-10008-- | decaying pre-mRNA 2                                                                                    | chr6 | sense_intronic |
| ENSG00000217295.14 | 4.5613271  | 0.2529798  | 1.06E-17  | 2.12E-16  | 0.01  | 0.21  | 0.29  | 0.29  | CD92         | CD molecule and Src domain 3                                                                           | chr6 | protein_coding |
| ENSG00000200665.10 | 1.3261748  | 0.0014942  | 0.0007248 | 0.0000000 | 0.02  | 0.0   | 0.0   | 0.32  | EMX2         | EMX homeobox 2                                                                                         | chr6 | protein_coding |
| ENSG00000219671.1  | -1.2211648 | 4.9611598  | 2.20E-13  | 3.95E-12  | 0.33  | 12.47 | 3.99  | 3.47  | ANKRD138     | ankyrin repeat domain 138                                                                              | chr6 | protein_coding |
| ENSG00000210296.12 | -1.1913406 | 6.9984764  | 3.64E-05  | 0.0015978 | 27.29 | 25.09 | 16.6  | 16.26 | THCD5        | THCD domain 5                                                                                          | chr6 | protein_coding |
| ENSG00000200584.7  | 1.0000000  | 1.3317486  | 1.00E-06  | 1.00E-06  | 0.44  | 0.19  | 0.44  | 0.09  | NBR22        | NBR22, member RAS oncogene family                                                                      | chr6 | protein_coding |
| ENSG00000216425.1  | 1.4212684  | 1.0401588  | 2.75E-22  | 7.87E-21  | 0.05  | 0.01  | 0.79  | 1.07  | STGAL6       | ST3 beta-galactoside alpha-2,3-sialyltransferase 6                                                     | chr6 | protein_coding |
| ENSG00000238660.10 | 1.7102993  | 0.5629845  | 7.26E-06  | 3.62E-05  | 0.17  | 0.2   | 0.02  | 0.18  | APLAF        | adaptor-related protein complex 1 associated regulatory protein, intergenic non-protein coding RNA 941 | chr6 | protein_coding |
| ENSG00000234344.3  | 1.3642487  | 1.2782206  | 2.02E-23  | 6.22E-22  | 1.62  | 1.8   | 0.29  | 0.08  | SPOCD1       | SPOC domain containing 1                                                                               | chr6 | protein_coding |
| ENSG00000236013.1  | 0.5352001  | 0.8006613  | 1.33E-09  | 1.73E-07  | 0.45  | 0.3   | 0.29  | 0.35  | SLC20A1      | solute carrier organic anion transporter family, member 2A1                                            | chr6 | protein_coding |
| ENSG00000242734.2  | 3.8825296  | 2.5310035  | 2.31E-26  | 8.73E-25  | 0.11  | 0.17  | 2.54  | 3.04  | RGAGA        | retrotransposon gag domain containing 4                                                                | chr6 | protein_coding |
| ENSG00000217702.14 | 6.4994354  | -0.2389672 | 1.78E-06  | 8.96E-06  | 0.0   | 0.003 | 0.05  | 0.03  | PROX1        | prosurin homeobox 1                                                                                    | chr6 | protein_coding |
| ENSG00000214111.13 | 2.7191191  | 0.204191   | 9.23E-17  | 3.04E-07  | 0.15  | 0.1   | 0.05  | 0.47  | ZNF187       | zinc finger protein 187                                                                                | chr6 | protein_coding |
| ENSG00000200492.6  | 1.3053641  | 4.3458442  | 9.49E-06  | 4.63E-05  | 1.43  | 1.44  | 0.49  | 4.76  | NTNT-AS1     | NTNT antisense RNA 1                                                                                   | chr6 | antisense      |
| ENSG00000219659.9  | -4.6674355 | -1.8110689 | 9.92E-10  | 8.71E-09  | 0.02  | 0.14  | 0.01  | 0.1   | CACNA1B      | calcium channel, voltage-dependent, T type, alpha 1H subunit                                           | chr6 | protein_coding |
| ENSG00000213919.13 | 1.0000000  | 1.3317486  | 1.00E-06  | 1.00E-06  | 0.44  | 0.19  | 0.44  | 0.09  | NBR22        | NBR22, member RAS oncogene family                                                                      | chr6 | protein_coding |
| ENSG00000217646.10 | -1.1103642 | 7.0624854  | 5.70E-05  | 0.0020446 | 61.35 | 56.41 | 36.29 | 33.87 | THAP4        | THAP domain containing 4                                                                               | chr6 | protein_coding |
| ENSG00000202836.05 | -1.2529606 | 1.3023222  | 0.0001231 | 0.0009926 | 0.59  | 0.78  | 0.43  | 0.35  | FAM156A      | family with sequence similarity 156, member A                                                          | chr6 | protein_coding |
| ENSG00000200284.1  | 1.7102993  | 0.5629845  | 7.26E-06  | 3.62E-05  | 0.17  | 0.2   | 0.02  | 0.18  | CTD-2047H1   | histone cluster 1, H20M                                                                                | chr6 | protein_coding |
| ENSG00000206883.1  | -1.3170003 | -2.8637184 | 0.0161562 | 0.0395166 | 0.12  | 0.27  | 0.06  | 0.1   | CTD-2047H1   | histone cluster 1, H20M                                                                                | chr6 | antisense      |
| ENSG00000213683.13 | 1.0859587  | 4.1161041  | 0.0002023 | 0.0008176 | 11.24 | 10.03 | 33.87 | 25.88 | NUTL1        | nucleotide diphosphate linked motif XI-type motif 14                                                   | chr6 | protein_coding |
| ENSG00000200766.11 | 1.7102993  | 0.5629845  | 7.26E-06  | 3.62E-05  | 0.17  | 0.2   | 0.02  | 0.18  | POLC3        | polynucleotide kinase                                                                                  | chr6 | protein_coding |
| ENSG00000218437.4  | 3.8666224  | 0.8907916  | 2.14E-08  | 4.56E-17  | 0.12  | 0.42  | 0.29  | 3.08  | HIST1H1B     | histone cluster 1, H1b                                                                                 | chr6 | protein_coding |
| ENSG00000200676.15 | 2.616209   | 0.0006564  | 0.0028018 | 0.0000000 | 0.02  | 0.0   | 0.0   | 0.21  | IL2A         | interleukin 12A                                                                                        | chr6 | protein_coding |
| ENSG00000217720.14 | 6.45521709 | -2.0709636 | 3.03E-06  | 1.62E-05  | 0.0   | 0.0   | 0.55  | 0.47  | RP11-10008-- | decaying pre-mRNA 2                                                                                    | chr6 | sense_intronic |
| ENSG00000217295.14 | 4.5613271  | 0.2529798  | 1.06E-17  | 2.12E-16  | 0.01  | 0.21  | 0.29  | 0.29  | CD92         | CD molecule and Src domain 3                                                                           | chr6 | protein_coding |
| ENSG00000200665.10 | 1.3261748  | 0.0014942  | 0.0007248 | 0.0000000 | 0.02  | 0.0   | 0.0   | 0.32  | EMX2         | EMX homeobox 2                                                                                         | chr6 | protein_coding |
| ENSG00000219671.1  | -1.2211648 | 4.9611598  | 2.20E-13  | 3.95E-12  | 0.33  | 12.47 | 3.99  | 3.47  | ANKRD138     | ankyrin repeat domain 138                                                                              | chr6 | protein_coding |
| ENSG00000210296.12 | -1.1913406 | 6.9984764  | 3.64E-05  | 0.0015978 | 27.29 | 25.09 | 16.6  | 16.26 | THCD5        | THCD domain 5                                                                                          | chr6 | protein_coding |
| ENSG00000200584.7  | 1.0000000  | 1.3317486  | 1.00E-06  | 1.00E-06  | 0.44  | 0.19  | 0.44  | 0.09  | NBR22        | NBR22, member RAS oncogene family                                                                      | chr6 | protein_coding |
| ENSG00000216425.1  | 1.4212684  | 1.0401588  | 2.75E-22  | 7.87E-21  | 0.05  | 0.01  | 0.79  | 1.07  | STGAL6       | ST3 beta-galactoside alpha-2,3-sialyltransferase 6                                                     | chr6 | protein_coding |
| ENSG00000238660.10 | 1.7102993  | 0.5629845  | 7.26E-06  | 3.62E-05  | 0.17  | 0.2   | 0.02  | 0.18  | APLAF        | adaptor-related protein complex 1 associated regulatory protein, intergenic non-protein coding RNA 941 | chr6 | protein_coding |
| ENSG00000234344.3  | 1.3642487  | 1.2782206  | 2.02E-23  | 6.22E-22  | 1.62  | 1.8   | 0.29  | 0.08  | SPOCD1       | SPOC domain containing 1                                                                               | chr6 | protein_coding |
| ENSG00000236013.1  | 0.5352001  | 0.8006613  | 1.33E-09  | 1.73E-07  | 0.45  | 0.3   | 0.29  | 0.35  | SLC20A1      | solute carrier organic anion transporter family, member 2A1                                            | chr6 | protein_coding |
| ENSG00000242734.2  | 3.8825296  | 2.5310035  | 2.31E-26  | 8.        |       |       |       |       |              |                                                                                                        |      |                |

|                    |            |            |           |            |        |        |            |                                                           |                                                                                                      |                                     |                      |                |
|--------------------|------------|------------|-----------|------------|--------|--------|------------|-----------------------------------------------------------|------------------------------------------------------------------------------------------------------|-------------------------------------|----------------------|----------------|
| ENSG00000188706.11 | -1.9426347 | 6.3683143  | 4.666-11  | 4.846-10   | 20.71  | 0      | 24.46      | 8.43                                                      | 7.18 ZDHHC9                                                                                          | zinc finger, DHHC-type containing 9 | chrX                 | protein_coding |
| ENSG00000128044.17 | 1.2863354  | 2.986922   | 0         | 3.986-47   | 0      | 0      | 0          | 3.78                                                      | 281 RPS                                                                                              | interferon regulatory factor 5      | chr7                 | protein_coding |
| ENSG0000027703.1   | 1.8848726  | 1.8848726  | 3.736-07  | 2.306-06   | 0      | 0      | 0.48       | 157 RP11-78A19.1                                          |                                                                                                      |                                     | chr18                | antisense      |
| ENSG00000124151.17 | 2.0969787  | 4.3070617  | 4.766-12  | 5.556-11   | 0.59   | 0.83   | 3.91       | 473 NCOA3                                                 | nuclear receptor coactivator 3                                                                       |                                     | chr20                | protein_coding |
| ENSG00000185836.10 | 4.1504468  | 0.005127   | 0.004869  | 0.004869   | 2.96   | 2.42   | 0.42       | 034 NTSG2                                                 | integrator complex subunit 2                                                                         |                                     | chr10                | protein_coding |
| ENSG00000133812.12 | -1.9103692 | 5.4968935  | 1.096-10  | 1.084-09   | 7.83   | 7.83   | 2.66       | MIKAL2                                                    | microtubule associated monoenoxygase, calponin and LIM domain containing 2                           |                                     | chr11                | protein_coding |
| ENSG00000102826.13 | 2.6345492  | 8.8640431  | 2.471-18  | 2.221-17   | 15.97  | 17.97  | 136.61     | 144.19 CPS1                                               | carbamoyl-phosphate synthase 1, mitochondrial                                                        |                                     | chr20                | protein_coding |
| ENSG00000135517.12 | 1.3919125  | 3.74979127 | 3.826-06  | 2.016-05   | 0.74   | 0.71   | 2.52       | 254 COL18A1                                               | collagen, type XVIII, alpha 1                                                                        |                                     | chr21                | protein_coding |
| ENSG00000182871.13 | 1.3919125  | 3.74979127 | 3.826-06  | 2.016-05   | 0.74   | 0.71   | 2.52       | 254 COL18A1                                               | collagen, type XVIII, alpha 1                                                                        |                                     | chr21                | protein_coding |
| ENSG00000176200.11 | 6.4925159  | 2.0492034  | 1.786-06  | 9.956-06   | 2.35   | 2.40   | 0.64       | 008 RP11-76G02                                            |                                                                                                      |                                     | chr1                 | protein_coding |
| ENSG00000177765.15 | 4.8583852  | 0.55       | 0.55      | 2.96-05    | 2.35   | 2.40   | 0.64       | 1383 SLTM                                                 | SARF-like, transcription modulator                                                                   |                                     | chr15                | protein_coding |
| ENSG00000130270.15 | -1.2238199 | 3.5046905  | 4.226-05  | 0.0001834  | 2.33   | 1.65   | 1.11       | ATP8B3                                                    | ATPase, aminohydroxymethyl transporter, class 1, type 8B, member 3                                   |                                     | chr19                | protein_coding |
| ENSG00000102107.1  | 1.9732616  | 0.7498996  | 6.286-06  | 1.084-05   | 7.43   | 8.27   | 36.04      | 4025 MT-TQ                                                | mitochondrially encoded tRNA glutamine                                                               | chrM1                               | protein_coding       |                |
| ENSG00000119888.9  | 4.3090833  | 1.7443639  | 1.146-25  | 4.106-24   | 0.11   | 0.14   | 2.26       | 436 EPCAM                                                 | epithelial cell adhesion molecule                                                                    | chr12                               | protein_coding       |                |
| ENSG00000120568.11 | -8.1233874 | -0.856396  | 1.196-14  | 1.846-13   | 0.38   | 0.18   | 0          | 0 ENOX1                                                   | ecto-NOX disulfide-thiol exchanger 1                                                                 | chr13                               | protein_coding       |                |
| ENSG00000163006.10 | 2.3567447  | -0.3992261 | 8.806-06  | 1.156-06   | 0.04   | 0.11   | 0.27       | 0.176 CDDC138                                             | coiled-coil domain containing 138                                                                    | chr2                                | protein_coding       |                |
| ENSG00000164323.11 | 1.9366248  | -0.263819  | 2.386-05  | 0.00010714 | 0.02   | 0.06   | 0.1        | 0.31 CFAP97                                               | cilia and flagella associated protein 97                                                             | chr10                               | protein_coding       |                |
| ENSG00000151092.15 | 1.1048349  | 2.8476049  | 0.0003196 | 0.010991   | 1.14   | 1.37   | 2.83       | 44 NGLV1                                                  | N-glycanase 1                                                                                        | chr13                               | protein_coding       |                |
| ENSG00000152621.1  | -5.5198359 | -2.8847712 | 0.0038008 | 0.0046907  | 0.11   | 0      | 0          | 0 RP11-377D9                                              |                                                                                                      | chr12                               | antisense            |                |
| ENSG00000230002.2  | 3.29919697 | -1.8616257 | 0.0001607 | 0.00062818 | 0      | 0.03   | 0.2        | 0.18 ALMS1-IT1                                            | ALMS1 intronic transcript 1                                                                          | chr2                                | sense_intronic       |                |
| ENSG00000102626.1  | 1.3265524  | -0.3289461 | 0.0023811 | 0.0070204  | 0.04   | 0.06   | 0.11       | 0.21 ZNF525                                               | zinc finger protein 525                                                                              | chr19                               | protein_coding       |                |
| ENSG00000232324.1  | -8.906061  | 0.9041787  | 3.536-31  | 1.752-29   | 4.53   | 6.33   | 0.06       | 0.05 AC009841.0                                           |                                                                                                      | chr19                               | antisense            |                |
| ENSG00000189376.10 | 1.7329252  | 2.5562166  | 3.766-08  | 2.666-07   | 1.85   | 1.46   | 6.86       | 788 C10orf76                                              | chromosome 8 open reading frame 76                                                                   | chr8                                | protein_coding       |                |
| ENSG00000104447.10 | 2.664415   | -0.438533  | 3.606-08  | 2.556-07   | 0.09   | 0.11   | 0.02       | 0.002 TRF51                                               | trichorhinophalangeal syndrome 1                                                                     | chr10                               | protein_coding       |                |
| ENSG00000195949.13 | 1.5359804  | 5.1686019  | 4.755-06  | 2.456-05   | 8.47   | 5.77   | 23.98      | 24.47 NAC3P7                                              | Ras association (RACGDP/GTP-binding) domain family (N-terminal) member 7                             | chr11                               | protein_coding       |                |
| ENSG00000185896.10 | -1.0951027 | 9.8077312  | 0.0001374 | 0.0005386  | 196.57 | 195.94 | 124.37     | 120.31 LAMP1                                              | lysosomal-associated membrane protein 1                                                              | chr13                               | protein_coding       |                |
| ENSG00000109821.11 | 1.0774038  | 3.2963287  | 0.002353  | 0.00119766 | 0.84   | 0.65   | 1.69       | 2.56 C6orf93                                              | cysteine binding protein-like 3                                                                      | chr7                                | protein_coding       |                |
| ENSG00000170525.17 | 1.1176381  | 6.24156112 | 0.0000787 | 0.0004343  | 8.09   | 7.37   | 20.05      | 24.8 PFKFB3                                               | 6-phosphofructo-2-kinase/fructose-2,6-bisphosphatase 3                                               | chr10                               | protein_coding       |                |
| ENSG00000121644.17 | 1.3157681  | 2.6350493  | 2.236-05  | 0.00010133 | 0.77   | 0.57   | 1.54       | 2.95 DES2                                                 | desmoglein isopeptidase 2                                                                            | chr16                               | protein_coding       |                |
| ENSG00000156711.15 | 2.9826035  | 3.1333566  | 1.206-18  | 9.566-17   | 0.32   | 0.18   | 2.38       | 2.49 MAPK13                                               | mitogen-activated protein kinase 13                                                                  | chr6                                | protein_coding       |                |
| ENSG00000136108.13 | 3.1980466  | 2.0758879  | 4.171-19  | 9.446-18   | 0.11   | 0.19   | 1.08       | 2.7 C16orf2                                               | cytoskeleton associated protein 2                                                                    | chr13                               | protein_coding       |                |
| ENSG00000137888.1  | 1.14760514 | 0.16899719 | 0.0042317 | 0.0020693  | 0.09   | 0.17   | 0.16       | 0.61 FITS                                                 | interferon-induced protein with tetratricopeptide repeats 5                                          | chr10                               | protein_coding       |                |
| ENSG00000124086.9  | 1.8029551  | 2.0051221  | 0.0018222 | 0.0018222  | 7.96   | 3.18   | 10.01      | 12.57 FAM210B                                             | family with sequence similarity 210, member B                                                        | chr19                               | protein_coding       |                |
| ENSG00000131931.7  | 2.0651822  | 0.2135443  | 8.066-07  | 4.716-06   | 0.07   | 0.24   | 0.05       | 1.17 THAP1                                                | THAP domain containing, apoptosis associated protein 1                                               | chr10                               | protein_coding       |                |
| ENSG00000106991.14 | -1.1538701 | 5.5222327  | 6.906-07  | 0.0002869  | 5.14   | 5.35   | 0.26       | 0.04 C16orf2                                              | ORAI calcium release-activated calcium modulator 2                                                   | chr7                                | protein_coding       |                |
| ENSG00000104144.14 | 1.5359804  | 5.1686019  | 4.755-06  | 2.456-05   | 8.47   | 5.77   | 23.98      | 24.47 NAC3P7                                              | guanine nucleotide binding protein (G protein), alpha activating activity polypeptide, oflatory type | chr11                               | protein_coding       |                |
| ENSG00000107590.4  | -1.4677607 | 5.3421434  | 5.210-17  | 3.156-06   | 14.56  | 18.71  | 6.36       | 7.66 PKDIP6                                               | pykrenin-like protein kinase 1 (autosomal dominant) pseudogene 6                                     | chr16                               | processed_transcript |                |
| ENSG00000114416.16 | 1.9332929  | 3.2963287  | 0.002353  | 0.00119766 | 0.84   | 0.65   | 1.69       | 2.56 C6orf93                                              | 6-phosphofructo-2-kinase/fructose-2,6-bisphosphatase 3                                               | chr7                                | protein_coding       |                |
| ENSG00000103000.7  | -4.5884464 | -1.2442568 | 2.1716-09 | 1.826-08   | 0.37   | 0.15   | 0.03       | 0.0 PLPAP                                                 | plasmaless vesicle associated protein                                                                | chr19                               | protein_coding       |                |
| ENSG00000157005.17 | -1.2812134 | 4.3926078  | 1.306-05  | 1.616-05   | 18.96  | 20.55  | 9.25       | 12.47 TMTN1                                               | N-terminal asparagine amidase                                                                        | chr16                               | protein_coding       |                |
| ENSG00000175966.1  | 1.2528941  | 0.673767   | 0.0007919 | 0.0019106  | 1.83   | 1.22   | RP11-10558 |                                                           |                                                                                                      | chr12                               | antisense            |                |
| ENSG0000027977.1   | 2.0359249  | -4.895213  | 1.456-05  | 6.846-05   | 0.07   | 0.04   | 0.33       | 0.28 CTA-390C10                                           | --                                                                                                   | chr22                               | sense_intronic       |                |
| ENSG00000105978.5  | -6.2420973 | -0.5480314 | 2.411-16  | 4.696-16   | 0.13   | 0.14   | 0          | 0 NYNRN                                                   | NYN domain and retroviral integrase containing                                                       | chr14                               | protein_coding       |                |
| ENSG00000147700.10 | 1.3783191  | 5.3421434  | 5.210-17  | 3.156-06   | 14.56  | 18.71  | 6.36       | 4.58 DMTK2                                                | DMT1-like family A2                                                                                  | chr12                               | protein_coding       |                |
| ENSG00000105996.1  | 1.0736291  | 1.6623716  | 3.596-24  | 1.176-22   | 0.5    | 0.06   | 6.63       | 6.23 C10orf1-AT                                           | C10orf1 antisense RNA 1                                                                              | chr10                               | antisense            |                |
| ENSG00000147699.15 | -3.9323991 | 3.5176808  | 1.246-29  | 5.646-28   | 2.86   | 1.88   | 0.62       | 0.02 FAM83A                                               | family with sequence similarity 83, member A                                                         | chr19                               | protein_coding       |                |
| ENSG00000104865.12 | 5.1174737  | 1.936-09   | 1.836-09  | 1.836-09   | 5.13   | 5.45   | RELB       | v-vi avian reticuloendotheliosis virus oncogene homolog B | chr18                                                                                                | protein_coding                      |                      |                |
| ENSG00000177728.13 | -1.1106752 | 5.1877603  | 0.0001377 | 0.00053979 | 7.29   | 7.47   | 4.85       | 4.26 KAA0195                                              | KIA0195                                                                                              | chr19                               | protein_coding       |                |
| ENSG00000135946.12 | 1.9332929  | 3.2963287  | 0.002353  | 0.00119766 | 0.84   | 0.65   | 1.69       | 2.56 C6orf93                                              | 6-phosphofructo-2-kinase/fructose-2,6-bisphosphatase 3                                               | chr7                                | protein_coding       |                |
| ENSG00000279900.1  | 5.45007274 | -2.7494288 | 0.0001377 | 0.00053979 | 7.29   | 7.47   | 4.85       | 4.26 KAA0195                                              | KIA0195                                                                                              | chr19                               | protein_coding       |                |
| ENSG00000186931.11 | -1.1602242 | 5.6624906  | 6.236-05  | 0.00026157 | 51.49  | 40.32  | 29.87      | 24.8 DTYMK                                                | deoxythymine kinase (thymidine kinase)                                                               | chr19                               | protein_coding       |                |
| ENSG00000181791.7  | 5.7988939  | 5.7988939  | 0.000384  | 0.0011597  | 12.65  | 11.73  | 7.57       | 0.47 KAA0414                                              | KIA0414                                                                                              | chr19                               | protein_coding       |                |
| ENSG00000158711.12 | 1.66700214 | 2.3575000  | 1.786-07  | 1.156-06   | 0.13   | 0.22   | 0.64       | 0.87 ELKA                                                 | ELK4, ETS-domain protein (SRF accessory protein 1)                                                   | chr1                                | protein_coding       |                |
| ENSG00000145362.15 | 1.3564486  | -1.1891145 | 0.0165825 | 0.0452583  | 0.01   | 0.02   | 0.03       | 0.04 ANK2                                                 | ankyrin 2, neuronal                                                                                  | chr1                                | protein_coding       |                |
| ENSG00000145308.15 | 1.3564486  | -1.1891145 | 0.0165825 | 0.0452583  | 0.01   | 0.02   | 0.03       | 0.04 ANK2                                                 | ankyrin 2, neuronal                                                                                  | chr1                                | protein_coding       |                |
| ENSG00000105978.5  | -6.2420973 | -0.5480314 | 2.411-16  | 4.696-16   | 0.13   | 0.14   | 0          | 0 NYNRN                                                   | NYN domain and retroviral integrase containing                                                       | chr14                               | protein_coding       |                |
| ENSG00000105996.1  | 1.0736291  | 1.6623716  | 3.596-24  | 1.176-22   | 0.5    | 0.06   | 6.63       | 6.23 C10orf1-AT                                           | C10orf1 antisense RNA 1                                                                              | chr10                               | antisense            |                |
| ENSG00000147699.15 | -3.9323991 | 3.5176808  | 1.246-29  | 5.646-28   | 2.86   | 1.88   | 0.62       | 0.02 FAM83A                                               | family with sequence similarity 83, member A                                                         | chr19                               | protein_coding       |                |
| ENSG00000104865.12 | 5.1174737  | 1.936-09   | 1.836-09  | 1.836-09   | 5.13   | 5.45   | RELB       | v-vi avian reticuloendotheliosis virus oncogene homolog B | chr18                                                                                                | protein_coding                      |                      |                |
| ENSG00000177728.13 | -1.1106752 | 5.1877603  | 0.0001377 | 0.00053979 | 7.29   | 7.47   | 4.85       | 4.26 KAA0195                                              | KIA0195                                                                                              | chr19                               | protein_coding       |                |
| ENSG00000135946.12 | 1.9332929  | 3.2963287  | 0.002353  | 0.00119766 | 0.84   | 0.65   | 1.69       | 2.56 C6orf93                                              | 6-phosphofructo-2-kinase/fructose-2,6-bisphosphatase 3                                               | chr7                                | protein_coding       |                |
| ENSG00000279900.1  | 5.45007274 | -2.7494288 | 0.0001377 | 0.00053979 | 7.29   | 7.47   | 4.85       | 4.26 KAA0195                                              | KIA0195                                                                                              | chr19                               | protein_coding       |                |
| ENSG00000186931.11 | -1.1602242 | 5.6624906  | 6.236-05  | 0.00026157 | 51.49  | 40.32  | 29.87      | 24.8 DTYMK                                                | deoxythymine kinase (thymidine kinase)                                                               | chr19                               | protein_coding       |                |
| ENSG00000181791.7  | 5.7988939  | 5.7988939  | 0.000384  | 0.0011597  | 12.65  | 11.73  | 7.57       | 0.47 KAA0414                                              | KIA0414                                                                                              | chr19                               | protein_coding       |                |
| ENSG00000158711.12 | 1.66700214 | 2.3575000  | 1.786-07  | 1.156-06   | 0.13   | 0.22   | 0.64       | 0.87 ELKA                                                 | ELK4, ETS-domain protein (SRF accessory protein 1)                                                   | chr1                                | protein_coding       |                |
| ENSG00000145362.15 | 1.3564486  | -1.1891145 | 0.0165825 | 0.0452583  | 0.01   | 0.02   | 0.03       | 0.04 ANK2                                                 | ankyrin 2, neuronal                                                                                  | chr1                                | protein_coding       |                |
| ENSG00000145308.15 | 1.3564486  | -1.1891145 | 0.0165825 | 0.0452583  | 0.01   | 0.02   | 0.03       | 0.04 ANK2                                                 | ankyrin 2, neuronal                                                                                  | chr1                                | protein_coding       |                |
| ENSG00000105978.5  | -6.2420973 | -0.5480314 | 2.411-16  | 4.696-16   | 0.13   | 0.14   | 0          | 0 NYNRN                                                   | NYN domain and retroviral integrase containing                                                       | chr14                               | protein_coding       |                |
| ENSG00000105996.1  | 1.0736291  | 1.6623716  | 3.596-24  | 1.176-22   | 0.5    | 0.06   | 6.63       | 6.23 C10orf1-AT                                           | C10orf1 antisense RNA 1                                                                              | chr10                               | antisense            |                |
| ENSG00000147699.15 | -3.9323991 | 3.5176808  | 1.246-29  | 5.646-28   | 2.86   | 1.88   | 0.62       | 0.02 FAM83A                                               | family with sequence similarity 83, member A                                                         | chr19                               | protein_coding       |                |
| ENSG00000104865.12 | 5.1174737  | 1.936-09   | 1.836-09  | 1.836-09   | 5.13   | 5.45   | RELB       | v-vi avian reticuloendotheliosis virus oncogene homolog B | chr18                                                                                                | protein_coding                      |                      |                |
| ENSG00000177728.13 | -1.1106752 | 5.1877603  | 0.0001377 | 0.00053979 | 7.29   | 7.47   | 4.85       | 4.26 KAA0195                                              | KIA0195                                                                                              | chr19                               | protein_coding       |                |
| ENSG00000135946.12 | 1.9332929  | 3.2963287  | 0.002353  | 0.00119766 | 0.84   | 0.65   | 1.69       | 2.56 C6orf93                                              | 6-phosphofructo-2-kinase/fructose-2,6-bisphosphatase 3                                               | chr7                                | protein_coding       |                |
| ENSG00000279900.1  | 5.45007274 | -2.7494288 | 0.0001377 | 0.00053979 | 7.29   | 7.47   | 4.85       | 4.26 KAA0195                                              | KIA0195                                                                                              | chr19                               | protein_coding       |                |
| ENSG00000186931.11 | -1.1602242 | 5.6624906  | 6.236-05  | 0.00026157 | 51.49  | 40.32  | 29.87      | 24.8 DTYMK                                                | deoxythymine kinase (thymidine kinase)                                                               | chr19                               | protein_coding       |                |
| ENSG00000181791.7  | 5.7988939  | 5.7988939  | 0.000384  | 0.0011597  | 12.65  | 11.73  | 7.57       | 0.47 KAA0414                                              | KIA0414                                                                                              | chr19                               | protein_coding       |                |
| ENSG00000158711.12 | 1.66700214 | 2.3575000  | 1.786-07  | 1.156-06   | 0.13   | 0.22   | 0.64       | 0.87 ELKA                                                 | ELK4, ETS-domain protein (SRF accessory protein 1)                                                   | chr1                                | protein_coding       |                |
| ENSG00000145362.15 | 1.3564486  | -1.1891145 | 0.0165825 | 0.0452583  | 0.01   | 0.02   | 0.03       | 0.04 ANK2                                                 | ankyrin 2, neuronal                                                                                  | chr1                                | protein_coding       |                |
| ENSG00000145308.15 | 1.3564486  | -1.1891145 | 0.0165825 | 0.0452583  | 0.01   | 0.02   | 0.03       | 0.04 ANK2                                                 | ankyrin 2, neuronal                                                                                  | chr1                                | protein_coding       |                |
| ENSG00000105978.5  | -6.2420973 | -0.5480314 | 2.411-16  | 4.696-16   | 0.13   | 0.14   | 0          | 0 NYNRN                                                   | NYN domain and retroviral integrase containing                                                       | chr14                               | protein_coding       |                |
| ENSG00000105996.1  | 1.0736291  | 1.6623716  | 3.596-24  | 1.176-22   | 0.5    | 0.06   | 6.63       | 6.23 C10orf1-AT                                           | C10orf1 antisense RNA 1                                                                              | chr10                               | antisense            |                |
| ENSG00000147699.15 | -3.9323991 |            |           |            |        |        |            |                                                           |                                                                                                      |                                     |                      |                |

|                    |            |             |            |            |        |        |        |        |              |                                                                                             |      |
|--------------------|------------|-------------|------------|------------|--------|--------|--------|--------|--------------|---------------------------------------------------------------------------------------------|------|
| ENSG0000017083.3   | 262245609  | 0.266536    | 1.07E-09   | 9.33E-09   | 0.02   | 0.17   | 0.92   | 0.62   | CEL          | carboxyl ester lipase                                                                       | ch9  |
| ENSG0000015339.3   | 1.1467196  | 1.1467196   | 0.000000   | 0.000000   | 0.00   | 0.00   | 0.00   | 1.27   | MARVELD2     | MARVEL domain containing 2                                                                  | ch9  |
| ENSG00000168439.5  | -1.0375901 | 9.33434769  | 0.0030502  | 0.0010887  | 235.46 | 157.97 | 238.96 | 150.08 | STIP1        | stress-induced phosphatase                                                                  | ch11 |
| ENSG00000266953.5  | -37199094  | 1.74394202  | 5.22E-23   | 1.57E-21   | 8.03   | 7.42   | 4.09   | 1.04   | RP11-618P1.1 | --                                                                                          | ch19 |
| ENSG0000024680.8   | -1.5454848 | 0.000000    | 2.55E-06   | 2.98E-05   | 0.01   | 0.11   | 0.00   | 0.0    | ZNF6583      | zinc finger protein 5583                                                                    | ch19 |
| ENSG00000174501.3  | 802970686  | -0.7757139  | 3.61E-13   | 4.73E-12   | 0      | 0      | 0.05   | 0.21   | ANKRD36C     | ankyrin repeat domain 36C                                                                   | ch19 |
| ENSG00000204386.9  | 122876597  | 5.79131048  | 2.28E-05   | 0.00010343 | 14.24  | 11.92  | 41.87  | 39.84  | NEU1         | sialidase 1 (lysosomal sialidase)                                                           | ch16 |
| ENSG0000015326.9   | 5.99861408 | 6.39E-06    | 3.19E-05   | 3.19E-05   | 14.47  | 7.99   | 14.47  | 0.27   | CAPRIN3      | calpain 15                                                                                  | ch16 |
| ENSG00000169071.1  | 11741841   | 1.59516326  | 0.0003923  | 0.00140048 | 0.35   | 0.29   | 0.62   | 1.32   | CXAP2L       | cytoskeleton associated protein 2-like                                                      | ch16 |
| ENSG00000252646.1  | -1.456584  | 1.94103217  | 6.59E-06   | 3.31E-05   | 0      | 0      | 0.64   | 0.35   | CYLR1        | citrate lyase beta like                                                                     | ch13 |
| ENSG0000017544.12  | -1.5550004 | 0.000000    | 0.0010265  | 0.0069522  | 0.54   | 0.00   | 0.00   | 0.38   | CABP4        | calmodulin binding protein 4                                                                | ch16 |
| ENSG00000212496.6  | 7.100136   | -1.5594428  | 7.18E-09   | 5.62E-08   | 0      | 0      | 0.32   | 0.42   | L13BR2       | interleukin 13 receptor, alpha 2                                                            | chX  |
| ENSG0000012496.6   | -1.4666799 | 6.7180264   | 4.53E-07   | 7.5E-06    | 23.9   | 19.5   | 10.91  | 9.75   | PTP1         | protein tyrosine kinase 7 (trachea)                                                         | ch6  |
| ENSG0000047133.14  | 151091483  | 4.78262696  | 3.07E-07   | 1.92E-06   | 1.35   | 15.3   | 4.79   | 6.15   | TA1          | TAF1 RNA polymerase I, TATA box binding protein (TBP)-associated factor, 250kDa             | ch15 |
| ENSG00000168613.3  | 123684844  | 701234436   | 1.85E-05   | 8.57E-05   | 13.26  | 14.09  | 42.95  | 42.95  | KMT7         | kissin family member 7                                                                      | ch15 |
| ENSG00000255916.1  | 1.4666799  | -2.0781831  | 0.000000   | 0.000000   | 0.00   | 0.00   | 0.00   | 0.86   | RP13-895J2.1 | --                                                                                          | ch12 |
| ENSG00000168613.3  | -2.7718226 | 427054555   | 6.94E-19   | 1.54E-17   | 8.9    | 8.15   | 16.7   | 1.65   | FGFR4        | fibroblast growth factor receptor 4                                                         | ch15 |
| ENSG00000189416.6  | 301014089  | -1.3229891  | 9.84E-06   | 4.79E-05   | 0.03   | 0.03   | 0.32   | 0.28   | SPAT1A1      | spatiotemporal associated 41 (non-protein coding)                                           | ch15 |
| ENSG00000144306.12 | 1.9182077  | 0.74807942  | 1.38E-06   | 7.65E-06   | 0.16   | 0.21   | 0.5    | 1.26   | SCRN2        | sequestin 2                                                                                 | ch12 |
| ENSG000002013318.4 | -1.7236872 | 5.19048842  | 5.04E-09   | 4.03E-08   | 9.27   | 7.91   | 3.53   | 3.4    | ARAP3        | ARFgap with RHGAP domain, ankyrin repeat and PH domain 3                                    | ch12 |
| ENSG00000161835.9  | 253627021  | -2.3705245  | 0.0077015  | 0.0197584  | 0      | 0      | 0.03   | 0.06   | GRASP        | GRP1 (general receptor for phosphoinositides 1)-associated scaffold protein                 | ch12 |
| ENSG00000227357.2  | 3.89863134 | -0.9391869  | 7.94E-12   | 8.35E-11   | 0.03   | 0.02   | 0.39   | 0.69   | RP11-475J2.4 | --                                                                                          | ch12 |
| ENSG000002061071.1 | 1.12583411 | -0.5143489  | 0.0510105  | 0.0370772  | 0.26   | 0.35   | 0.4    | 1.36   | RP11-223E5.4 | --                                                                                          | ch16 |
| ENSG00000255918.14 | -1.1829426 | 1.11477743  | 0.0004924  | 0.0017292  | 0.67   | 0.69   | 0.36   | 0.43   | KCNQ1        | potassium channel, voltage gated KOT-like subfamily O, member 1                             | ch11 |
| ENSG00000145020.8  | 5.6311557  | 1.9785988   | 0.0003929  | 0.00140167 | 0.09   | 0.11   | 0.02   | 0.02   | CCO-3L1      | coiled-coil domain containing R1                                                            | ch16 |
| ENSG00000165775.16 | -1.16184   | 5.4205366   | 6.19E-05   | 0.0002903  | 7.44   | 7.4    | 3.96   | 4.89   | RUNDC2       | RUN14 domain containing 2                                                                   | chX  |
| ENSG00000259915.5  | 1.0353488  | -0.5187118  | 0.0001358  | 0.0005254  | 0.09   | 0.00   | 0.12   | 0.32   | PSD          | pleckstrin and Sec7 domain containing                                                       | ch10 |
| ENSG00000172699.3  | 221043855  | 1.62047012  | 1.74E-10   | 1.68E-09   | 0.08   | 0.07   | 0.36   | 0.58   | DMX1         | Dmx-like 1                                                                                  | ch15 |
| ENSG00000199714.9  | -2.2803732 | -0.1175828  | 1.46E-07   | 9.57E-07   | 0.6    | 0.57   | 0.19   | 0.13   | ZDHHC1       | zinc finger, DHHC-type containing 1                                                         | ch16 |
| ENSG00000147324.9  | 1.2254867  | 4.23531946  | 1.07E-05   | 0.0013804  | 3.33   | 3.32   | 1.77   | 2.02   | MHR23        | malignant fibrous histiocytoma amplified sequence 1                                         | ch16 |
| ENSG00000198883.10 | -1.6073509 | -1.3742277  | 0.0065433  | 0.01777607 | 0.12   | 0.12   | 0.07   | 0.03   | PNNM5        | pancreaticoduodenal MA antigen family member 5                                              | chX  |
| ENSG00000275234.1  | 5.05188882 | -2.9717446  | 0.010455   | 0.02582742 | 0      | 0      | 0.09   | 0.28   | CD-2396E7    | --                                                                                          | ch19 |
| ENSG00000144306.12 | 1.2298407  | 1.43031316  | 2.23E-16   | 4.00E-15   | 0.04   | 0.57   | 1.58   | 0.53   | COXOR        | coxsackievirus and adenovirus receptor                                                      | ch19 |
| ENSG00000258941.3  | 255519371  | 1.22063306  | 4.13E-14   | 5.99E-13   | 0.29   | 0.19   | 0.36   | 2.44   | RP11-407N1.1 | --                                                                                          | ch19 |
| ENSG0000026762.1   | 1.0166934  | 0.000000    | 0.0004362  | 0.00154347 | 127.04 | 144.52 | 99.02  | 1.29   | CCO-3L1      | coiled-coil domain containing R1                                                            | ch15 |
| ENSG00000134490.19 | 436744779  | 2.71090737  | 1.31E-05   | 7.93E-34   | 0.16   | 0.13   | 0.56   | 5.19   | CABP2        | calmodulin binding tyrosine-(Y)-phosphorylation regulated                                   | ch15 |
| ENSG00000151413.15 | 1.6861487  | 1.69105284  | 4.57E-07   | 2.78E-06   | 0.32   | 0.47   | 1.25   | 2.14   | NBPJL        | nucleotide binding protein-like                                                             | ch14 |
| ENSG00000149434.12 | 1.8670378  | 2.67454178  | 2.14E-04   | 3.21E-13   | 0.48   | 0.46   | 2.21   | 0.29   | SLC32A2      | solute carrier family 38, member 2                                                          | ch16 |
| ENSG00000139451.3  | 1.0254281  | 0.1974510   | 0.0067249  | 0.01821738 | 0.15   | 0.34   | 0.65   | 0.65   | ZNF221       | zinc finger protein 221                                                                     | ch19 |
| ENSG00000165983.3  | 2.1768306  | 0.9503497   | 4.80E-09   | 3.84E-08   | 0.18   | 0.1    | 0.59   | 1.13   | PFTR         | phosphotransferase related 2                                                                | ch10 |
| ENSG00000188716.10 | 2.6867821  | 1.0117129   | 0.000000   | 0.000000   | 0.00   | 0.00   | 0.00   | 0.20   | BAG4         | UDP-Galactase4-GlcNAc 4-epi-4- galactose-4-epimerase, polypeptide 6                         | ch18 |
| ENSG00000174000.16 | 7.30963459 | -1.4000165  | 4.49E-10   | 4.11E-09   | 0      | 0      | 0.08   | 0.04   | TMEM154      | transmembrane protein 154                                                                   | ch14 |
| ENSG00000174130.11 | -3.105025  | -1.663805   | 8.20E-06   | 4.05E-05   | 0.05   | 0.08   | 0      | 0.02   | LR6          | tail-1 receptor 6                                                                           | ch16 |
| ENSG00000274482.1  | 1.5347247  | -0.43487678 | 0.007536   | 0.0025504  | 0.1    | 0.3    | 0.84   | 1.75   | RP4-186P1.5  | --                                                                                          | ch10 |
| ENSG00000198954.1  | 1.6952639  | 5.1974738   | 8.99E-09   | 6.94E-08   | 6.31   | 6.06   | 23.36  | 30.18  | CASP4        | casease 4, acetoxyol-related cysteine peptidase                                             | ch11 |
| ENSG00000212057.4  | 5.45974547 | -2.7440718  | 0.0015808  | 0.0049521  | 0      | 0      | 0.07   | 0.12   | SFRP5        | secreted frizzled-related protein 5                                                         | ch10 |
| ENSG00000161220.2  | 4.8984958  | 3.5501361   | 2.91E-37   | 1.91E-35   | 21.81  | 31.05  | 0      | 0.29   | RP11-820P1   | --                                                                                          | ch19 |
| ENSG00000151012.12 | -1.2785784 | 2.63606661  | 3.42E-05   | 0.00015064 | 0.68   | 0.07   | 0.42   | 0.39   | SLC7A11      | solute carrier family 7 (anionic amino acid transporter light chain, xc- system), member 11 | ch19 |
| ENSG00000101384.10 | 2.67454178 | 1.97454178  | 2.14E-04   | 3.21E-13   | 0.48   | 0.46   | 2.21   | 0.29   | SLC32A2      | solute carrier family 38, member 2                                                          | ch16 |
| ENSG00000159715.5  | -1.3715838 | 2.99831231  | 6.94E-06   | 3.47E-05   | 3.04   | 2.37   | 1.28   | 1.52   | SLC45A3      | solute carrier family 45, member 3                                                          | ch1  |
| ENSG00000184719.10 | -6.8795944 | -1.5026795  | 1.35E-07   | 8.87E-07   | 0.12   | 0.06   | 0      | 0      | RNL5         | reninase, FAD-dependent amino oxidase                                                       | ch10 |
| ENSG00000212238.11 | 2.6864407  | 1.0312227   | 0.000000   | 0.000000   | 0      | 0      | 0.00   | 1.92   | CEP350       | centromere protein 350                                                                      | ch1  |
| ENSG00000172965.3  | -1.2688171 | -0.489059   | 0.00434978 | 0.01238249 | 0.25   | 0.5    | 0.28   | 0.13   | MMR435-1H    | --                                                                                          | ch12 |
| ENSG00000196275.12 | 22259189   | -1.8861128  | 0.0045943  | 0.0126454  | 0.01   | 0.12   | 0.05   | 0.05   | GTF2RCD      | GTF2F protein domain containing 2                                                           | ch17 |
| ENSG00000184241.10 | 3.9107013  | 1.43031316  | 2.23E-16   | 4.00E-15   | 0.04   | 0.57   | 1.58   | 0.53   | COXOR        | coxsackievirus and adenovirus receptor                                                      | ch19 |
| ENSG00000118974.3  | 1.19353241 | 2.10924339  | 0.0001585  | 0.0006152  | 0.27   | 0.31   | 0.71   | 0.44   | RAB3GAP2     | RAB3 GTPase activating protein subunit 2 (non-catalytic)                                    | ch1  |
| ENSG00000296260.1  | -4.7533727 | -1.8450712  | 8.18E-08   | 5.55E-07   | 0.55   | 0.4    | 0      | 0.03   | S100A5       | S100 calcium binding protein A5                                                             | ch19 |
| ENSG00000153071.15 | 3.2452028  | 0.000000    | 0.000000   | 0.000000   | 0      | 0      | 0.00   | 0.29   | DMX1         | Dmx-like 1                                                                                  | ch16 |
| ENSG00000199499.1  | 3.53780763 | -2.3434818  | 0.0003932  | 0.00140205 | 0      | 0.03   | 0.62   | 0.03   | RP11-1379J2  | --                                                                                          | ch15 |
| ENSG0000021890.2   | 0.0382649  | 0.000000    | 1.91E-12   | 3.21E-11   | 1.27   | 1.27   | 0.00   | 1.37   | NP7R         | neuronal pentraxin receptor                                                                 | ch12 |
| ENSG00000175832.11 | -4.7844372 | 7.09889475  | 3.67E-06   | 4.09E-44   | 78.5   | 74.25  | 4.23   | 3.14   | ETV4         | ets variant 4                                                                               | ch17 |
| ENSG00000408323.14 | -1.8664942 | 4.74769387  | 3.77E-10   | 3.50E-09   | 5.4    | 48.1   | 1.78   | 1.95   | ITPR1        | latent transforming growth factor beta binding protein 1                                    | ch12 |
| ENSG00000101610.10 | 1.8670378  | 2.67454178  | 2.14E-04   | 3.21E-13   | 0.48   | 0.46   | 2.21   | 0.29   | SLC32A2      | solute carrier family 38, member 2                                                          | ch16 |
| ENSG00000208843.1  | 1.93812338 | -1.0216093  | 0.0005219  | 0.00181847 | 0.03   | 0.05   | 0.25   | 0.15   | CHST7-9B2.1  | --                                                                                          | ch10 |
| ENSG00000107779.10 | 2.03591564 | 2.0062684   | 9.81E-10   | 8.62E-09   | 0.1    | 0.12   | 0.52   | 0.05   | MBPRIA       | bone morphogenetic protein, type IIA                                                        | ch12 |
| ENSG00000215313.8  | 1.8670378  | 2.67454178  | 2.14E-04   | 3.21E-13   | 0.48   | 0.46   | 2.21   | 0.29   | SLC32A2      | solute carrier family 38, member 2                                                          | ch16 |
| ENSG00000110700.5  | -1.3865418 | 8.06484823  | 2.23E-06   | 1.22E-05   | 528.45 | 438.21 | 25.75  | 1.14   | PCDNL1       | ribosomal protein S13                                                                       | ch19 |
| ENSG00000132000.10 | 1.34236388 | 1.66149752  | 4.65E-05   | 0.00020059 | 0.32   | 0.55   | 1.67   | 1.14   | PCDNL1       | ribosomal protein S13                                                                       | ch19 |
| ENSG00000106892.10 | 1.80727102 | 3.4270132   | 3.65E-09   | 3.11E-08   | 0.42   | 0.46   | 0.29   | 0.28   | CPD          | carboxylesterase D                                                                          | ch16 |
| ENSG00000147110.13 | 2.10857651 | -1.1676336  | 0.0002372  | 0.00080378 | 0      | 0.12   | 0.36   | 0.34   | KRT13        | keratin 13, type I                                                                          | ch17 |
| ENSG0000014448.3   | -6.7907596 | -0.0291296  | 2.24E-22   | 6.45E-21   | 0.2    | 0.15   | 0      | 0      | GREB1L       | growth regulation by estrogen in breast cancer-like                                         | ch17 |
| ENSG00000245963.3  | 1.8670378  | 2.67454178  | 2.14E-04   | 3.21E-13   | 0.48   | 0.46   | 2.21   | 0.29   | SLC32A2      | solute carrier family 38, member 2                                                          | ch16 |
| ENSG00000116254.16 | 3.2466052  | 2.52569155  | 8.18E-21   | 2.09E-19   | 0.07   | 0.11   | 1.32   | 0.96   | CHD5         | chromodomain helicase DNA binding protein 5                                                 | ch19 |
| ENSG00000215038.5  | 1.8670378  | 2.67454178  | 2.14E-04   | 3.21E-13   | 0.48   | 0.46   | 2.21   | 0.29   | SLC32A2      | solute carrier family 38, member 2                                                          | ch16 |
| ENSG0000010844.16  | 101427571  | 1.52755364  | 0.00212515 | 0.00648903 | 0.66   | 0.64   | 1.23   | 2.27   | ATG4A        | autophagy related 4A, cysteine peptidase                                                    | ch12 |
| ENSG00000179941.6  | 2.7773268  | -0.3066162  | 3.60E-08   | 2.55E-07   | 0.04   | 0.04   | 0.3    | 0.41   | BRIS10       | Barclay-Bied syndrome 10                                                                    | ch12 |
| ENSG00000138768.13 | 2.4305807  | 3.9189238   | 9.76E-14   | 1.19E-12   | 0      | 0      | 0.00   | 0.33   | USO1         | usherin transmembrane protein 1                                                             | ch13 |
| ENSG0000017124.11  | -5.205475  | -0.0371861  | 0.010455   | 0.02582742 | 0.08   | 0      | 0      | 0      | FUT3         | fucosyltransferase 3 (galactoside 3H4L-fucosyltransferase, Lewis blood group)               | ch19 |
| ENSG00000446054.18 | -2.2972375 | 5.68738873  | 1.80E-14   | 2.72E-13   | 14.73  | 13.96  | 42.5   | 35.1   | TRMT7        | tripartite motif containing 7                                                               | ch12 |
| ENSG00000106498.9  | 0.00002726 | 0.000000    | 0.0001885  | 0.00044888 | 0.17   | 0.00   | 0.00   | 0.17   | KOMT4        | lysine (K)-specific demethylase 7A                                                          | ch1  |
| ENSG00000108123.10 | 9.57471189 | 0.62945023  | 2.92E-27   | 1.18E-25   | 0      | 0      | 0.94   | 0.6    | EPH8E        | EPR receptor B8                                                                             | ch17 |
| ENSG00000104687.11 | -1.8671768 | 6.1447262   | 1.23E-08   | 9.30E-08   | 27.11  | 28.75  | 5.28   | 14.27  | SGF          | glutathione S-transferase                                                                   | ch19 |
| ENSG00000152465.5  | 3.2172314  | -0.8941202  | 2.42E-08   | 1.56E-06   | 0.94   | 0.96   | 0.16   | 0.06   | CCO-3L1      | coiled-coil domain containing R1                                                            | ch15 |
| ENSG00000110442.10 | -1.0761891 | 4.04080931  | 0.00024045 | 0.00080974 | 8.23   | 7.59   | 5.28   | 4.58   | COMMD9       | COMMD domain containing 9                                                                   | ch11 |
| ENSG00000223474.5  | 2.6864407  | -1.2660733  |            |            |        |        |        |        |              |                                                                                             |      |

|                    |            |            |            |            |          |        |       |                     |       |                                                                                                      |
|--------------------|------------|------------|------------|------------|----------|--------|-------|---------------------|-------|------------------------------------------------------------------------------------------------------|
| ENSG00000280302.1  | -5.2091082 | -3.0548822 | 0.0053865  | 0.01488851 | 0.03     | 0.03   | 0     | RP11-64C12 --       | chr18 | TEC                                                                                                  |
| ENSG0000017146.1   | 1.5318404  | 1.5238464  | 0.0018474  | 0.00081    | 0.02     | 0.02   | 0     | 002 ACV0101 --      | chr2  | Myo10 RISC complex RNA helicase like 1                                                               |
| ENSG00000292646.1  | -1.5224124 | -2.9258645 | 1.31566    | 6.556      | 0.06     | 1.44   | 0.67  | 0.69 ITGB3          | chr17 | integrin, beta 3 (platelet glycoprotein IIIa, antigen CD61)                                          |
| ENSG0000024171.7   | 3.3113174  | 5.0073502  | 1.011-13   | 1.41E-12   | 0.02     | 0.06   | 0.55  | 0.55 PAR6DB         | chr20 | par-6 family cell polarity regulator beta                                                            |
| ENSG0000017930.5   | 1.1310124  | 2.0085865  | 1.0000000  | 1.17E-24   | 0.03     | 0.03   | 0     | 0 CPYF113           | chr19 | cytochrome P450, family 4, subfamily 1, polypeptide 11                                               |
| ENSG00000165617.3  | -3.2700954 | -2.5418727 | 1.28E-21   | 3.52E-20   | 1.75     | 2.15   | 0.27  | 1.27 DACT1          | chr14 | dishevelled-binding antagonist of beta-catenin 1                                                     |
| ENSG0000011799.9   | 1.32211457 | 8.0305661  | 4.75E-06   | 2.46E-05   | 9.76     | 10.29  | 30.51 | 36.42 COL12A1       | chr16 | collagen, type XII, alpha 1                                                                          |
| ENSG0000017455.13  | 1.21840326 | 2.19480326 | 3.00E-26   | 1.17E-24   | 0.03     | 0.03   | 0     | 1.16 CTX214         | chr16 | colloid-coupled protein containing 14                                                                |
| ENSG00000183386.8  | -3.2131869 | -4.5596516 | 4.79E-24   | 1.55E-22   | 22.47    | 19.36  | 3.23  | 2.78 FH3L3          | chr19 | four and a half LIM domains 3                                                                        |
| ENSG0000023220.2   | -1.7529945 | -1.3869791 | 7.65E-11   | 7.77E-10   | 1.96     | 0.67   | 0     | 0 AC039405          | chr16 | antisense                                                                                            |
| ENSG00000242349.4  | 3.1606219  | 1.2051455  | 4.45E-05   | 2.24E-05   | 1.22E-05 | 0.05   | 0.52  | 0.52 NPRA-AS1       | chr19 | NPRA antisense RNA 1                                                                                 |
| ENSG00000108406.8  | 2.5757804  | 2.6716131  | 4.07E-15   | 6.88E-14   | 0.42     | 0.37   | 2.28  | 4.1 DPK40           | chr17 | DEAH (Asp-Glu-Ala-His) box polypeptide 40                                                            |
| ENSG00000107079.13 | 1.4652605  | 2.620309   | 1.97E-05   | 1.00E-05   | 0.26     | 0.3    | 0.78  | 13 TEAD1            | chr17 | TEA domain member 1 (SV40 transcriptional enhancer factor)                                           |
| ENSG00000187608.7  | -1.1319719 | 6.2914329  | 5.53E-06   | 2.72E-05   | 99.86    | 92.27  | 53.08 | 49.4 IGS15          | chr17 | IGS15 ubiquitin-like modifier                                                                        |
| ENSG00000143452.14 | 16.2369259 | -0.9062787 | 0.0021697  | 0.0066013  | 0.01     | 0.18   | 0.2   | 0.58 HORMAD1        | chr1  | HORM domain containing 1                                                                             |
| ENSG00000154031.11 | 1.36109785 | 4.2232317  | 4.27E-06   | 2.22E-05   | 2.01     | 2.23   | 7.36  | 7.14 RUCV           | chr17 | RUCV                                                                                                 |
| ENSG00000204267.12 | -1.3103288 | 4.49376745 | 8.32E-06   | 4.10E-05   | 3.32     | 4.49   | 2.34  | 2.17 TAP2           | chr6  | transporter 2, ATP-binding cassette, sub-family B (MDR/TAP)                                          |
| ENSG00000143971.7  | 2.7662454  | 0.4625149  | 5.44E-11   | 5.52E-10   | 0.02     | 0.14   | 0.52  | 0.89 ETAA1          | chr2  | Ewing tumor-associated antigen 1                                                                     |
| ENSG00000106698.10 | -2.0021328 | 2.6349824  | 2.54E-10   | 2.05E-09   | 7.09     | 2.23   | 0.17  | 1.07 SLC11A1        | chr19 | solute carrier family 11 (neuronal/splial high affinity glutamate transporter, system Xag), member 1 |
| ENSG00000112406.4  | 2.2187967  | 0.80205255 | 6.43E-09   | 5.08E-08   | 0.06     | 0.11   | 0.42  | 0.62 HECA           | chr6  | headcase homologue (Drosophila)                                                                      |
| ENSG00000181061.12 | 1.77601599 | 2.1862011  | 4.22E-08   | 2.96E-07   | 0.96     | 1      | 1.46  | 5.51 HIGD1A         | chr11 | HIG1 hypoxia inducible domain family, member 1A                                                      |
| ENSG00000163960.10 | -1.464651  | 7.0313167  | 4.16E-13   | 5.42E-12   | 0.03     | 0.61   | 0.1   | 1.84 UNK07          | chr19 | unclassified protein                                                                                 |
| ENSG0000075043.16  | 4.4579597  | 1.0626448  | 4.03E-16   | 7.08E-15   | 0.01     | 0.01   | 0.01  | 0.24 KCNQ2          | chr20 | potassium channel, voltage gated KQT-like subfamily Q, member 2                                      |
| ENSG00000202222.1  | -1.0579688 | 0.94712338 | 0.047011   | 0.0132891  | 3.3      | 2.8    | 0.27  | 1.57 CTC-338M12 --  | chr3  | antisense                                                                                            |
| ENSG00000446218.28 | -1.2484651 | 1.8103167  | 0.0000000  | 0.0000000  | 151.1    | 171.84 | 46.5  | 50.58 NOP16         | chr16 | NOP16 nucleolar protein                                                                              |
| ENSG00000279347.1  | 2.3904218  | -2.0719026 | 0.0061421  | 0.0167895  | 0        | 0.05   | 0.14  | 0.23 RP11-851J17 -- | chr8  | antisense                                                                                            |
| ENSG00000245701.1  | -7.9071019 | -1.0554499 | 2.44E-13   | 3.25E-12   | 0.79     | 1.38   | 0     | 0 RP11-369H4 --     | chr4  | antisense                                                                                            |
| ENSG00000170161.6  | 1.10731684 | 1.55075268 | 0.0084567  | 0.0028309  | 0.56     | 0.59   | 1.46  | 1.84 RP11-262H1 --  | chr9  | antisense                                                                                            |
| ENSG00000174669.10 | -2.8569627 | 3.2682927  | 7.72E-19   | 1.70E-17   | 5.4      | 4.81   | 1.04  | 0.84 SLC29A2        | chr11 | solute carrier family 29 (equilibrative nucleoside transporter), member 2                            |
| ENSG00000140187.16 | 1.5493133  | 4.8936602  | 1.59E-07   | 1.03E-06   | 3.26     | 4      | 1.57  | 1.75 MRR5           | chr16 | chondrial ribosome recycling factor                                                                  |
| ENSG00000298041.1  | 2.24612679 | -1.2351597 | 0.0001323  | 0.00051985 | 0.12     | 0.09   | 0.86  | 0.55 CTD-201K1 --   | chr16 | antisense                                                                                            |
| ENSG00000138104.1  | 1.72697617 | 3.0873822  | 2.41E-08   | 1.75E-07   | 0.86     | 1.54   | 3.62  | 7 CEP35             | chr10 | centrosomal protein 59kDa                                                                            |
| ENSG00000139711.13 | 2.6809044  | 2.9173313  | 3.67E-11   | 3.85E-10   | 1.59     | 1.89   | 0.59  | 0.65 KLU2B          | chr10 | leish-like family member 29                                                                          |
| ENSG00000108510.8  | 2.67134597 | 2.2156379  | 4.66E-15   | 7.49E-14   | 0.07     | 0.12   | 0.73  | 0.89 MED13          | chr17 | mediator complex subunit 13                                                                          |
| ENSG00000208533.1  | 1.192751   | 0.613636   | 0.0012554  | 0.0036638  | 0.32     | 0.46   | 0.36  | 0.65 ARHGFP23       | chr2  | Rho guanine nucleotide exchange factor (GEF) 33                                                      |
| ENSG0000027947.12  | -1.569652  | 0.939346   | 6.22E-05   | 0.0026302  | 13.17    | 12.26  | 7.21  | 7.81 BAPG1          | chr2  | xyloxyprotein beta 1.4-palmitoyltransferase, polypeptide 7                                           |
| ENSG00000186918.15 | 3.45329856 | 0.18439355 | 6.00E-13   | 7.70E-12   | 0.05     | 0.01   | 0.26  | 0.7 ZNF195          | chr11 | zinc finger protein 195                                                                              |
| ENSG00000187222.14 | -2.9680882 | -2.4476239 | 0.0012121  | 0.0036442  | 0.05     | 0.04   | 0     | 0.01 ZBTB20         | chr3  | zinc finger and BTB domain containing 20                                                             |
| ENSG00000206260.1  | 2.3826329  | -0.9718626 | 1.73E-06   | 8.03E-05   | 0.52     | 0.33   | 3.27  | 2.88 SCANT1         | chr3  | SCAT/ATXN1 antisense RNA 1                                                                           |
| ENSG00000205131.1  | 2.0927191  | -1.961514  | 0.0004059  | 0.0000000  | 0.29     | 0.91   | 1.38  | 0.29 RP11-138F1 --  | chr3  | antisense                                                                                            |
| ENSG0000010092.19  | 1.22750117 | 2.2724943  | 9.29E-05   | 0.00037553 | 0.75     | 0.86   | 2.73  | 2.3 XSHBP1          | chr22 | SH3-domain binding protein 1                                                                         |
| ENSG00000134002.14 | 1.3317674  | 0.5264453  | 0.0004005  | 0.00155496 | 0.09     | 0.29   | 0.36  | 0.88 STK26          | chrX  | serine/threonine protein kinase 26                                                                   |
| ENSG00000147496.12 | 1.04688341 | 0.4688341  | 6.18E-22   | 2.55E-20   | 2.49     | 24.92  | 0     | 0.3 THY1            | chr1  | Thy-1 cell surface antigen                                                                           |
| ENSG0000008954.13  | 6.81539267 | -1.7863963 | 1.35E-07   | 8.87E-07   | 0        | 0      | 0.01  | 1.16 IGSF9B         | chr11 | immunoglobulin superfamily, member 9B                                                                |
| ENSG00000168624.3  | 3.7043917  | -1.5596214 | 5.39E-06   | 7.9E-05    | 0.01     | 0.01   | 0.11  | 0.14 CAS24E         | chr4  | protein                                                                                              |
| ENSG0000018591.8   | 1.8730449  | 5.4934413  | 4.33E-09   | 0.0003797  | 0        | 0      | 0     | 8.84 SPI            | chr4  | SP1 transcription factor                                                                             |
| ENSG00000258953.2  | 2.3042305  | -1.289741  | 0.01384632 | 0.0439494  | 0.08     | 0      | 0.06  | 0.47 CTD-305J12 --  | chr14 | antisense                                                                                            |
| ENSG00000156374.13 | 1.1291419  | 2.6854929  | 0.0000000  | 0.0000000  | 0.41     | 0.07   | 0.07  | 2.2 PCG10           | chr10 | polcomb argona rino finger 6                                                                         |
| ENSG00000178947.8  | 7.6252369  | -1.1215563 | 9.11E-12   | 1.03E-10   | 0        | 0      | 0     | 0.23 UNCC0086       | chr1  | antisense                                                                                            |
| ENSG00000179314.12 | 4.3084975  | -1.7933077 | 2.62E-06   | 1.42E-05   | 0        | 0      | 0.07  | 0.08 WSCD1          | chr17 | WSC domain containing 1                                                                              |
| ENSG0000006188.15  | 1.4603196  | 2.9823362  | 0.000455   | 0.00262162 | 0.01     | 0.03   | 0.02  | 0.02 CCK2           | chr1  | schick cell adhesion molecule 2                                                                      |
| ENSG00000109501.12 | 1.42528617 | 5.77447162 | 1.01E-06   | 5.83E-06   | 6.27     | 6.92   | 25.24 | 2.185 WFS1          | chr17 | Wolfram syndrome 1 (wolfram)                                                                         |
| ENSG00000157110.14 | -2.3991215 | 4.68654324 | 7.03E-15   | 1.11E-13   | 6.74     | 7.47   | 1.87  | 1.87 RBPMS          | chr17 | RNA binding protein with multiple splicing                                                           |
| ENSG0000016862.13  | 1.4242467  | 6.4440415  | 8.91E-11   | 3.32E-08   | 2.49     | 24.92  | 0     | 0.23 NDI1           | chr2  | ND1                                                                                                  |
| ENSG00000266903.1  | -1.5282059 | 1.48321202 | 4.76E-06   | 2.46E-05   | 2        | 2.74   | 1.11  | 1.08 CTD-171A8.1 -- | chr19 | antisense                                                                                            |
| ENSG00000108210.12 | 2.3003657  | -0.1311664 | 2.19E-06   | 1.20E-05   | 0.02     | 0.1    | 0.14  | 0.58 PACB2          | chr4  | cholesterol/histidinol-4-kinase type 2 beta                                                          |
| ENSG00000230104.2  | 1.2694426  | 2.9173313  | 3.14E-05   | 0.00013904 | 9.11     | 8.34   | 1.49  | 5.13 ZBTB22         | chr1  | zinc finger and BTB domain containing 22                                                             |
| ENSG00000174827.7  | -1.4269185 | 5.1577068  | 1.08E-06   | 6.15E-06   | 24.1     | 18.79  | 0.16  | 9.58 POLC4          | chr11 | polychrome (DNA-directed), delta 4, accessory subunit                                                |
| ENSG00000214317.8  | -1.5310717 | 5.534448   | 1.11E-07   | 7.43E-07   | 20.36    | 22.03  | 0     | 2.14 ACAT2          | chr6  | acyl-CoA acetyltransferase 2                                                                         |
| ENSG00000269533.4  | 2.87474344 | -2.7426684 | 0.0615662  | 0.0399166  | 0        | 0.04   | 0.15  | 0.35 AC003002.6     | chr19 | antisense                                                                                            |
| ENSG00000146426.16 | -3.5356771 | -0.6257216 | 1.89E-10   | 1.81E-09   | 0.07     | 0.17   | 0.01  | 0.01 TMAM2          | chr6  | T-cell lymphoma invasion and metastasis 2                                                            |
| ENSG00000164651.12 | 1.4603196  | 2.9823362  | 0.000455   | 0.00262162 | 0.01     | 0.03   | 0.02  | 0.02 SLC12A2        | chr1  | solute carrier family 12 (sodium/potassium/chloride transporter), member 2                           |
| ENSG00000143494.14 | 1.69982226 | -1.4476937 | 0.00497703 | 0.0139196  | 0.01     | 0.03   | 0.02  | 0.12 VASH2          | chr2  | vasohistin-2                                                                                         |
| ENSG00000130762.13 | -1.4395201 | 6.93278011 | 1.76E-07   | 4.32E-06   | 29.21    | 29.23  | 13.86 | 1.487 ARHGFP16      | chr1  | Rho guanine nucleotide exchange factor (GEF) 16                                                      |
| ENSG0000016435.14  | 1.8730449  | 5.4934413  | 4.33E-09   | 0.0003797  | 0        | 0      | 0     | 0.83 E1F3           | chr1  | E1-4-like factor 3 (5' end domain transcription factor, epithelial-specific)                         |
| ENSG00000156374.13 | 1.79379596 | 1.66797458 | 9.32E-08   | 6.27E-07   | 0.13     | 0.14   | 0.58  | 0.67 THR9           | chr1  | throid hormone receptor, beta                                                                        |
| ENSG00000108624.17 | 2.8826551  | 1.6851387  | 3.29E-21   | 8.73E-20   | 12.32    | 15.71  | 99.34 | 177.92 HSP90AA1     | chr14 | heat shock protein 90kDa alpha (cytosolic), class A member 1                                         |
| ENSG00000234968.11 | 1.0313403  | 0.4682372  | 0.0000000  | 0.0000000  | 0.1      | 0.03   | 0.03  | 0.89 CTD-345H17 --  | chr1  | antisense                                                                                            |
| ENSG00000103227.17 | 2.23435631 | 3.98239556 | 3.54E-13   | 4.65E-12   | 1.83     | 1.55   | 10.71 | 10.56 LMF1          | chr16 | lipase maturation factor 1                                                                           |
| ENSG00000101752.10 | 2.8747028  | 1.49880878 | 7.56E-15   | 1.15E-13   | 0.03     | 0.08   | 0.51  | 0.51 LMB1           | chr18 | limb1/endob 83 ubiquitin protein ligase 1                                                            |
| ENSG0000010557.14  | 1.7307447  | 3.8990351  | 8.76E-11   | 2.59E-07   | 6.81     | 6.81   | 0.55  | 4.55 MYH14          | chr1  | myosin, heavy chain 14, non-muscle                                                                   |
| ENSG00000103453.10 | 1.8955108  | 1.07759562 | 1.45E-07   | 9.50E-07   | 0.19     | 0.32   | 1.26  | 1.24 ASTE1          | chr1  | asteroid homology 1 (Drosophila)                                                                     |
| ENSG00000119929.11 | 1.653867   | 1.653867   | 1.05E-10   | 2.16E-09   | 0.19     | 0.19   | 0.19  | 0.83 CUTC1          | chr10 | CutC cooperates with CutC                                                                            |
| ENSG00000164826.16 | -1.2911768 | 6.7606888  | 8.07E-06   | 4.00E-05   | 25.92    | 26.97  | 11.81 | 17.08 SUN1          | chr1  | Sun1 and UNC59 domain containing 1                                                                   |
| ENSG00000207902.1  | 8.8893782  | -0.085973  | 2.39E-20   | 5.90E-19   | 0        | 0      | 33.41 | 21.79 SNORD41       | chr19 | small nucleolar RNA, C/D box 41                                                                      |
| ENSG00000204003.7  | 1.739114   | 1.3217686  | 0.0020074  | 0.0030882  | 0.13     | 0.21   | 0     | 0.11 RP11-21H1 --   | chr9  | antisense                                                                                            |
| ENSG0000029793.1   | -5.523229  | -2.862669  | 0.0018808  | 0.0049521  | 0.06     | 0.06   | 0     | 0 RP11-400N9 --     | chr1  | antisense                                                                                            |
| ENSG00000108513.13 | -4.7371347 | 7.32176148 | 7.50E-41   | 6.04E-39   | 35.08    | 35.32  | 2.96  | 1.95 STGAL3         | chr1  | STG beta-galactosidase alpha-2,3-sialyltransferase 1                                                 |
| ENSG00000182233.7  | 1.0315153  | 2.3888148  | 0.0017761  | 0.0018719  | 0.04     | 0.04   | 0.04  | 0.04 ZNF1           | chr1  | antisense                                                                                            |
| ENSG00000265303.1  | 1.52883328 | 0.52894552 | 6.81E-05   | 0.00028389 | 1.01     | 1.02   | 1.51  | 3.91 CTD-2510F5 --  | chr17 | antisense                                                                                            |
| ENSG00000162086.13 | 2.03511577 | 2.1322299  | 5.73E-10   | 5.16E-09   | 0.42     | 0.36   | 1.18  | 2.51 ZNF37A         | chr16 | zinc finger protein 75a                                                                              |
| ENSG00000182795.12 | 1.0315153  | 2.3888148  | 0.0017761  | 0.0018719  | 0.04     | 0.04   | 0.04  | 0.04 CTD-111B       | chr16 | chromosome 1 open reading frame 116                                                                  |
| ENSG00000208153.1  | 2.79456999 | -2.2994901 | 0.0014589  | 0.00541921 | 0.02     | 0      | 0.11  | 0.11 RP11-878N2 --  | chr16 | antisense                                                                                            |
| ENSG00000103895.4  | 1.44119177 | 3.1096339  | 0.0000000  | 0.0000000  | 0.06     | 0.06   | 1.11  | 22. CCL             | chr1  | CCL protein oncogene, 83 ubiquitin protein ligase                                                    |
| ENSG00000102891.10 | 2.4055129  | 2.3692904  | 1.33E-13   | 1.82E-12   | 0.31     | 0.28   | 1.27  | 3.08 TW5G1          | chr18 | twisted actuation BMP signaling modulator 1                                                          |
| ENSG00000164548.18 | 1.4603196  | 2.9823362  | 0.000455   | 0.00262162 | 0.01     | 0.03   | 0.02  | 0.12 VASH2          | chr2  | vasohistin-2                                                                                         |
| ENSG00000188385.10 | 1.4603196  | 2.9823362  | 0.000455   | 0.00262162 | 0.0      |        |       |                     |       |                                                                                                      |

|                    |            |            |            |            |        |        |                 |                                                    |                                                                                                                  |                                              |                |                |
|--------------------|------------|------------|------------|------------|--------|--------|-----------------|----------------------------------------------------|------------------------------------------------------------------------------------------------------------------|----------------------------------------------|----------------|----------------|
| ENSG00000149970.13 | 6.1603826  | -2.2802665 | 2.70E-05   | 0.0012094  | 0      | 0      | 0.07            | CNCRS2                                             | connector enhancer of kinase suppressor of Ras 2                                                                 | chrX                                         | protein_coding |                |
| ENSG00000259463.3  | 2.6213356  | -0.832694  | 3.04E-05   | 0.002148   | 0      | 0.01   | 2.49 RP1-261D10 | ---                                                | chr14                                                                                                            | antisense                                    |                |                |
| ENSG00000178173.13 | 2.17912678 | -0.510717  | 8.25E-06   | 4.07E-05   | 0.02   | 0.01   | 0.15 LCOLR      | ligand dependent nuclear receptor corepressor-like | chr14                                                                                                            | protein_coding                               |                |                |
| ENSG0000010367.14  | 4.2799496  | 1.1661876  | 5.60E-22   | 1.57E-20   | 0.02   | 0.17   | 0.66 EDCXS      | exocyst complex component 5                        | chr14                                                                                                            | protein_coding                               |                |                |
| ENSG0000010104.10  | 1.12299467 | 6.8875133  | 0.00017    | 0.0004352  | 6.07   | 0.01   | 37.16 CCCC98    | colicd-coiled coil domain containing 86            | chr14                                                                                                            | protein_coding                               |                |                |
| ENSG00000239656.5  | -4.688302  | -0.321712  | 1.76E-15   | 2.94E-14   | 1.2    | 1.11   | 0.06 E0X        | RP1-462L8 --                                       | chr14                                                                                                            | lncRNA                                       |                |                |
| ENSG0000045025.2   | -1.743031  | -0.452226  | 5.82E-05   | 0.0004531  | 0.34   | 0.42   | 0.01            | 0.28 RP1-87501 --                                  | chr18                                                                                                            | antisense                                    |                |                |
| ENSG00000175512.1  | 2.24540499 | -2.1039184 | 0.0023116  | 0.0242959  | 0.1    | 0.15   | 0.09 RP1-3212E1 | ---                                                | chr18                                                                                                            | lncRNA                                       |                |                |
| ENSG00000105948.12 | 1.19309632 | 1.88757536 | 0.0002258  | 0.00048533 | 0.33   | 0.43   | 0.98            | 1.35 TTC26                                         | tetrahydropterid repeat domain 26                                                                                | chr17                                        | protein_coding |                |
| ENSG00000139493.9  | 2.68794908 | 2.6769844  | 4.46E-16   | 8.14E-15   | 0.29   | 0.31   | 0.20            | 3.13 CTGV                                          | cathenin V                                                                                                       | chr19                                        | protein_coding |                |
| ENSG0000055539.14  | -0.853454  | -0.0074442 | 0.0074442  | 0.0204577  | 0.2    | 0.15   | 0.01            | 0.01 SEMAG4                                        | sema domain, immunoglobulin domain (Ig), transmembrane domain (TM) and short cytoplasmic domain, (semaphorin) 4G | chr16                                        | protein_coding |                |
| ENSG0000040986.7   | 5.9746286  | -2.4149021 | 8.36E-05   | 0.0004062  | 0      | 0      | 0.16            | 0.07 RP1L3L                                        | ribosomal protein L3L                                                                                            | chr16                                        | protein_coding |                |
| ENSG0000070081.4   | 2.4002053  | 3.9544141  | 1.11E-14   | 4.75E-13   | 0.15   | 1.59   | 6.61            | 12.76 NUCB2                                        | nucleobindin 2                                                                                                   | chr19                                        | protein_coding |                |
| ENSG00000105699.15 | 3.12462756 | 6.4762981  | 5.26E-24   | 1.68E-22   | 5.8    | 5.85   | 73.47           | 61.61 LSR                                          | lysokins stimulated lipoprotein receptor                                                                         | chr18                                        | lncRNA         |                |
| ENSG00000263884.1  | 3.06343599 | -2.0291067 | 0.0002605  | 0.00096399 | 0.03   | 0      | 0.14            | 0.18 RP11-70501 --                                 | crotonolipid protein 2 (colonic epithelium-enriched)                                                             | chrX                                         | protein_coding |                |
| ENSG00000102007.9  | -2.269668  | 8.871227   | 1.09E-05   | 2.05E-12   | 0.08   | 0.89   | 546.67          | 14.63 RP2                                          | 3.061 CTPase family protein                                                                                      | chr11                                        | protein_coding |                |
| ENSG00000168016.5  | -3.021065  | 5.46393648 | 2.31E-22   | 6.64E-21   | 12.01  | 13.98  | 1.93            | 2.33 ABT2                                          | anaphase repeat and BTB (POZ) domain containing 2                                                                | chr11                                        | protein_coding |                |
| ENSG00000197448.12 | 1.07239445 | 5.75384056 | 0.00019183 | 0.00076549 | 77.73  | 73.98  | 222.5           | 219.19 GSTK1                                       | glutathione S-transferase kappa 1                                                                                | chr17                                        | protein_coding |                |
| ENSG00000163007.7  | 6.564685   | -2.3220103 | 8.95E-06   | 4.39E-05   | 0.18   | 0.15   | 0               | 0                                                  | 1 TKT4                                                                                                           | tdk4                                         | chr2           | protein_coding |
| ENSG00000169967.15 | 2.90047708 | 1.65416808 | 1.56E-15   | 2.61E-14   | 0.06   | 0.04   | 0.32            | 0.74 MAP3K2                                        | mitogen-activated protein kinase kinase kinase 2                                                                 | chr2                                         | protein_coding |                |
| ENSG00000198672.9  | 8.88696753 | 5.11166306 | 7.03E-29   | 4.43E-27   | 0.03   | 0.06   | 18.52           | 19.96 KIAA1211L                                    | KIAA1211-like                                                                                                    | chr2                                         | protein_coding |                |
| ENSG00000147677.9  | -1.0517471 | 6.1178719  | 0.00026318 | 0.0003747  | 13.69  | 18.13  | 1.81            | 11.69 EF3H                                         | eukaryotic translation initiation factor 3, subunit H                                                            | chr8                                         | protein_coding |                |
| ENSG00000181031.14 | -2.1017841 | 2.0849922  | 1.82E-10   | 1.76E-09   | 1.81   | 1.87   | 0.03            | 0.52 RPH3AL                                        | ratp3lin 3A-like (without C2 domains)                                                                            | chr17                                        | protein_coding |                |
| ENSG00000444304.13 | 1.15183742 | 0.74079159 | 0.00140003 | 0.00446529 | 1.1    | 0.87   | 1.38            | 4 TRNB                                             | TP53R binding protein                                                                                            | chr2                                         | protein_coding |                |
| ENSG00000233930.3  | 4.72703895 | -3.141721  | 0.0188973  | 0.04519567 | 0      | 0      | 0.07            | 0.01 KETAPAS-AS1                                   | KETAPAS-1/KETAPAS-2 antisense RNA 1                                                                              | chr17                                        | antisense      |                |
| ENSG00000134318.12 | 4.0803389  | 2.8153781  | 2.41E-29   | 1.08E-27   | 0.05   | 0.1    | 1.14            | 2.09 ROCK2                                         | Rho-associated, coiled-coil containing protein kinase 2                                                          | chr17                                        | protein_coding |                |
| ENSG0000023835.4   | -3.3212961 | -2.7885037 | 0.00043694 | 0.02469951 | 0.34   | 0.09   | 0               | 0.04 LPH1-AS1                                      | LPH1 antisense RNA 1 (head to head)                                                                              | chr12                                        | antisense      |                |
| ENSG00000189184.5  | -5.069216  | 4.4442049  | -5.069216  | 5.96E-44   | 4.43   | 4.64   | 0.1             | 0.2 MN1                                            | meningioma (disrupted in balanced translocation) 1                                                               | chr22                                        | protein_coding |                |
| ENSG00000132485.11 | 1.02172173 | 3.29551329 | 0.00066865 | 0.00228173 | 1.47   | 1.83   | 2.93            | 6.06 ZRANB2                                        | zinc finger, RAN-binding domain containing 2                                                                     | chr17                                        | protein_coding |                |
| ENSG0000010228.11  | 0.10498364 | 0.8005492  | 1.45E-13   | 2.05E-12   | 0.08   | 0.08   | 0.89            | 0.63 RAB35                                         | RAB35, member RAS-oncogene family                                                                                | chr22                                        | protein_coding |                |
| ENSG00000167705.10 | 2.12082829 | 4.43990755 | 2.54E-12   | 3.06E-11   | 3.44   | 3.34   | 3.94            | 21.07 RILP                                         | Rab interacting lysosomal protein                                                                                | chr17                                        | protein_coding |                |
| ENSG00000157214.12 | 3.66067347 | -1.59144   | 8.20E-06   | 4.05E-05   | 0      | 0.01   | 0.06            | 0.08 STEAP2                                        | STEAP family member 2, metallothioneinase                                                                        | chr7                                         | protein_coding |                |
| ENSG00000172752.5  | 7.31987163 | 1.3907382  | 4.48E-10   | 1.11E-09   | 0.12   | 0.03   | 0.33            | 0.87 HRAUSL5                                       | HRAUSL5-like suppressor                                                                                          | chr19                                        | protein_coding |                |
| ENSG00000000419.11 | 1.23003252 | 4.37498372 | 2.92E-05   | 0.00013027 | 7.07   | 10.18  | 2.64            | 33.49 DPM1                                         | dolichyl-phosphate mannosyltransferase polypeptide 1, catalytic subunit                                          | chr20                                        | protein_coding |                |
| ENSG00000263307.1  | 5.27261161 | -0.260399  | 0.0209502  | 0.00656312 | 0.01   | 0.08   | 0.46            | 0                                                  | 0.11 RP11-16862                                                                                                  | ---                                          | chr18          | antisense      |
| ENSG00000242515.4  | 0.52529893 | 2.0405916  | 2.14E-35   | 1.29E-33   | 0.01   | 0.08   | 0.06            | 2.19 UGT1A10                                       | UDP glucuronosyltransferase 1 family, polypeptide A10                                                            | chr18                                        | protein_coding |                |
| ENSG00000185963.11 | 1.8509613  | 0.43886313 | 2.82E-06   | 1.52E-05   | 0.06   | 0.23   | 0.47            | 0.93 CDB                                           | cydin-phosphatidyl-inositol-dependent kinase B                                                                   | chr13                                        | protein_coding |                |
| ENSG00000241939.7  | 2.8313104  | -0.1843661 | 3.81E-06   | 2.68E-15   | 0.12   | 0.12   | 0.38            | 16 HCAAI1                                          | hydroxy-2-oxoglutarate aldolase 1                                                                                | chr16                                        | protein_coding |                |
| ENSG00000119865.7  | 1.9777973  | 2.9885384  | 3.72E-10   | 3.46E-09   | 0.68   | 0.65   | 3.07            | 3.92 CNRIP1                                        | carminaprotein interacting protein 1                                                                             | chr16                                        | protein_coding |                |
| ENSG00000230438.6  | -3.0209797 | -0.1477375 | 5.21E-11   | 5.39E-10   | 0.78   | 1.07   | 0.12            | 0.18 SERPINF1                                      | serpin peptidase inhibitor, domain 8 (ovalbumin), member 9, pseudogene 1                                         | chr16                                        | lncRNA         |                |
| ENSG0000018168.13  | 1.9201707  | 7.7836218  | 6.80E-10   | 6.07E-09   | 0.12   | 0.12   | 0.12            | 0.12 UNCL05                                        | un-5 homolog C (C. elegans)                                                                                      | chr4                                         | protein_coding |                |
| ENSG00000102390.9  | -3.7020023 | 1.57624072 | 3.72E-22   | 1.05E-20   | 3.18   | 4.29   | 0.37            | 0.39 PRDC1                                         | pyruvate carboxylase biosynthesis domain containing 1                                                            | chr16                                        | protein_coding |                |
| ENSG0000059122.15  | -1.2609946 | 0.33090097 | 1.33E-06   | 6.31E-05   | 19.39  | 17.1   | 10.77           | 9.49 RLYWCH1                                       | RLYWCH-like zinc finger 1                                                                                        | chr16                                        | protein_coding |                |
| ENSG0000038944.9   | 1.14143065 | 0.00019441 | 0.00019441 | 0.00073758 | 0.32   | 0.38   | 0.38            | 0.85 ZNF394                                        | zinc finger protein 394                                                                                          | chr22                                        | antisense      |                |
| ENSG00000273076.1  | 2.60022538 | -1.9342871 | 0.0017973  | 0.00556364 | 0      | 0.2    | 1               | 0.72 RP3-50815.1                                   | ---                                                                                                              | chr22                                        | antisense      |                |
| ENSG00000174013.7  | 1.73153031 | 2.40905125 | 5.56E-08   | 3.86E-07   | 0.6    | 0.29   | 1.31            | 1.59 RBK045                                        | R-box protein 45                                                                                                 | chr17                                        | protein_coding |                |
| ENSG00000151806.12 | 1.04002026 | 1.04002026 | 2.46E-08   | 0.0001369  | 0.13   | 0.12   | 0.04            | 0.19 GUPT                                          | GUPT family homolog (S. cerevisiae)                                                                              | chr17                                        | protein_coding |                |
| ENSG00000198855.5  | 2.1275706  | 1.84338902 | 1.60E-10   | 1.55E-09   | 0.18   | 0.38   | 1.46            | 1.17 PCD                                           | PC domain containing                                                                                             | chr17                                        | protein_coding |                |
| ENSG00000161405.15 | 4.7981891  | 0.1251262  | 4.51E-11   | 1.51E-16   | 0.2    | 0.12   | 0.12            | 0.21 KZFB                                          | KAROS family zinc finger 3 (Aicoli)                                                                              | chr12                                        | protein_coding |                |
| ENSG00000254402.1  | 3.2324222  | -0.141339  | 1.39E-10   | 1.37E-09   | 0.04   | 0.05   | 0.48            | 0.65 AP00062.4                                     | ---                                                                                                              | chr11                                        | sense_intronic |                |
| ENSG0000011485.13  | -1.1666437 | 8.718662   | 5.02E-05   | 0.0002143  | 231.54 | 216.21 | 136.63          | 130.03 PPP3C                                       | protein phosphatase 5, catalytic subunit                                                                         | chr19                                        | protein_coding |                |
| ENSG0000026840.4   | 1.926107   | 2.87866218 | 6.80E-10   | 6.07E-09   | 1.83   | 1.12   | 0.12            | 0.82 CTD-2521M                                     | ---                                                                                                              | chr19                                        | lncRNA         |                |
| ENSG00000136997.13 | -3.2801382 | 7.20848149 | 4.44E-26   | 1.64E-24   | 71.89  | 72.84  | 9.48            | 10.39 MYC                                          | v-myc avian myelocytomatous viral oncogene homolog                                                               | chr10                                        | protein_coding |                |
| ENSG00000256855.5  | -7.4624228 | -1.4457573 | 1.84E-10   | 1.77E-09   | 0.24   | 0.22   | 0               | 0                                                  | 0 ZNF350                                                                                                         | zinc finger protein 350                      | chr19          | protein_coding |
| ENSG00000168488.7  | 1.0737518  | 1.0737518  | 1.0737518  | 1.0737518  | 10.4   | 10.4   | 10.4            | 75.39 ATAD3A                                       | ATAD3 family, AAA domain containing 3A                                                                           | chr19                                        | protein_coding |                |
| ENSG00000140497.15 | 1.23273732 | 5.22739309 | 2.30E-05   | 0.00010461 | 6.92   | 7.78   | 2.492           | 20.98 SCAMP2                                       | secretory carrier membrane protein 2                                                                             | chr15                                        | protein_coding |                |
| ENSG00000277728.3  | 3.8712652  | -1.214597  | 8.40E-05   | 0.00039145 | 0      | 0.02   | 0.2             | 0.17 TARDBP                                        | TAR DNA binding protein                                                                                          | chr1                                         | protein_coding |                |
| ENSG00000263152.1  | 0.57763328 | -2.7695282 | 0.0047781  | 0.00167191 | 0.13   | 0.12   | 0.04            | 0                                                  | 0 UNCL00602                                                                                                      | long interspersed non-protein coding RNA 602 | chr1           | antisense      |
| ENSG00000254243.1  | 6.6682088  | -1.9087382 | 6.25E-07   | 0.732E-06  | 0      | 0      | 0.23            | 0.26 EBN2                                          | embryonic Bonavirus-like nucleoprotein 2                                                                         | chr3                                         | protein_coding |                |
| ENSG00000163138.15 | 2.9166515  | -1.572572  | 0.010362   | 0.02630329 | 7.58   | 6.61   | 1.21            | 1.35 ANKRD1                                        | ankyrin repeat and sterile alpha motif domain containing 6                                                       | chr19                                        | protein_coding |                |
| ENSG0000059673.14  | 1.19530134 | 4.71102222 | 4.36E-05   | 0.00018907 | 1.29   | 1.74   | 4.36            | 4.89 C23H1A                                        | zinc finger CCHC-type containing 11A                                                                             | chr1                                         | protein_coding |                |
| ENSG00000239663.2  | 7.348517   | -1.5431557 | 7.05E-10   | 6.28E-09   | 0.07   | 0.07   | 0               | 0                                                  | 0 CTD-23452                                                                                                      | ---                                          | chr1           | antisense      |
| ENSG00000137088.12 | -2.5408169 | 1.572572   | 4.51E-11   | 9.01E-05   | 0.05   | 0.05   | 0.05            | 0.03 SPAG8                                         | spERM associated antigen 8                                                                                       | chr9                                         | protein_coding |                |
| ENSG00000167766.17 | 2.23417531 | 1.85947138 | 5.72E-11   | 5.89E-10   | 0.09   | 0.22   | 0.54            | 1.38 ZNF83                                         | zinc finger protein 83                                                                                           | chr19                                        | protein_coding |                |
| ENSG00000273486.1  | 4.1434817  | -1.1548203 | 1.13E-05   | 5.42E-05   | 0.02   | 0      | 0.15            | 0.31 RP11-731C1 --                                 | ---                                                                                                              | chr1                                         | antisense      |                |
| ENSG00000254338.1  | 5.4046937  | 2.1671824  | 1.33E-05   | 0.00021369 | 0.13   | 0.04   | 0.04            | 0.08 CTD-25894                                     | ---                                                                                                              | chr19                                        | lncRNA         |                |
| ENSG0000023537.2   | -5.474398  | -0.0412647 | 1.22E-16   | 2.23E-15   | 0.16   | 0.25   | 0.01            | 0                                                  | 0 PCDHGA7                                                                                                        | protocadherin gamma family A7                | chr5           | protein_coding |
| ENSG00000129033.14 | 3.9914294  | 2.08476115 | 1.29E-20   | 3.25E-19   | 0.04   | 0.03   | 0.41            | 0.52 VPS3C                                         | vacuolar protein sorting 13, homolog C (S. cerevisiae)                                                           | chr15                                        | protein_coding |                |
| ENSG00000145984.12 | 1.46730658 | -1.525722  | 0.010362   | 0.02630329 | 7.58   | 6.61   | 1.21            | 0.35 ARHDI1                                        | arh domain containing 1                                                                                          | chr1                                         | protein_coding |                |
| ENSG00000164327.11 | 3.17989024 | 1.737323   | 1.76E-17   | 3.47E-16   | 0.04   | 0.06   | 0.38            | 0.81 RICTOR                                        | RICTOR independent component of mTORC, complex 2                                                                 | chr5                                         | protein_coding |                |
| ENSG0000013689.15  | 1.15340933 | 5.5618036  | 6.99E-05   | 0.00029249 | 2.85   | 2.06   | 1.22            | 7.37 HELZ2                                         | helix zinc finger 2, transcriptional coactivator                                                                 | chr20                                        | protein_coding |                |
| ENSG00000145916.7  | 1.9379665  | 1.9379665  | 3.96E-11   | 5.07E-13   | 0.13   | 0.12   | 0.17            | 7.76 WNT9A                                         | wingless-type MMV integration site family, member 9A                                                             | chr1                                         | protein_coding |                |
| ENSG0000021104.6   | 6.61967026 | 1.88235775 | 1.07E-37   | 7.15E-36   | 0.02   | 0.02   | 3.1             | 3.09 FAM117A                                       | family with sequence similarity 117, member A                                                                    | chr17                                        | protein_coding |                |
| ENSG0000013452.18  | 0.012867   | -1.572572  | 4.51E-11   | 9.01E-05   | 0.05   | 0.05   | 0.05            | 0.56 LEST1                                         | leukemia E6 fusion transcript 1                                                                                  | chr17                                        | protein_coding |                |
| ENSG00000237976.1  | 1.37024287 | -1.0836347 | 0.0122403  | 0.03060662 | 0.35   | 0.23   | 0.67            | 1.32 RP11-126K1                                    | ---                                                                                                              | chr1                                         | antisense      |                |
| ENSG00000102981.8  | 2.1839453  | 1.88185245 | 1.14E-10   | 1.13E-09   | 0.89   | 0.76   | 5.47            | 4.54 PAR6D6                                        | par-6 family cell polarity regulator alpha                                                                       | chr16                                        | protein_coding |                |
| ENSG0000022496.12  | 0.1013883  | 3.2423694  | 0.0001944  | 0.0023967  | 2.9    | 2.64   | 0.66            | 0.18 RP11-517F6                                    | ---                                                                                                              | chr1                                         | protein_coding |                |
| ENSG00000128311.5  | 5.06203318 | -2.9716376 | 0.010405   | 0.02582742 | 0      | 0      | 0.07            | 0.07 TXLINB                                        | TXLINB                                                                                                           | chr10                                        | protein_coding |                |
| ENSG00000196128.9  | 7.09975508 | 1.44788259 | 6.72E-35   | 3.91E-33   | 0      | 0.04   | 1.62            | 3.95 HLA-DRB1                                      | major histocompatibility complex, class II, DR beta 1                                                            | chr6                                         | protein_coding |                |
| ENSG00000164888.7  | 1.505555   | 7.84988887 | 1.07E-05   | 0.0001369  | 56.7   | 34.92  | 0.42            | 30.17 ATAD1                                        | ataxin 1-like domain containing 1                                                                                | chr16                                        | protein_coding |                |
| ENSG00000168733.11 | -1.2656626 | 0.05226385 | 0.00149552 | 0.00471519 | 0.37   | 0.28   | 0.1             | 0.16 LINGO1                                        | leucine rich repeat and Ig domain containing 1                                                                   | chr15                                        | protein_coding |                |
| ENSG00000198697.4  | 1.111298   | 1.64549983 | 1.09E-06   | 6.20E-06   | 1.73   | 1.93   | 0.71            | 0.88 C10L4                                         | chromatin component 1, a subcomponent-like 4                                                                     | chr12                                        | protein_coding |                |

ENSG0000023931.4 8.14272985 -0.6721839 4.35E-14 6.30E-13 0 0 0 0.67 LINC00342 long intergenic non-protein coding RNA 342  
ENSG00000239291.1 0.00575175 -2.122527 1.02E-06 6.0E-05 0.11 0.01 0.2 0 RP11-150J01 --  
ENSG0000047168.11 -1.8341332 -0.0827609 1.07E-05 5.16E-05 1.06 0.42 0.29 027 LRK2G interleukin 2 receptor, gamma chain  
ENSG00000238786.1 247110292 -0.1942084 8.27E-08 5.70E-07 0.22 0.32 2.6 141 RP11-649A01 --  
ENSG00000168803.13 32175122 1.8181174 1.27E-05 1.32E-06 1.12 0.44 0.2 017 FAM212B antisense RNA 5  
ENSG0000025276.1 6.6271731 -1.945154 6.29E-07 3.72E-06 0 0 0 11 RRM1-AS1 RRM1 antisense RNA 1  
ENSG0000016889.4 -1.584549 0.0684507 0.0011265 0.0004408 1.71 1.81 0.93 087 VAMP5 vesicle-associated membrane protein 5  
ENSG00000227811.2 1.1352788 0.0404388 0.0138678 0.0138678 0.09 0.09 0.12 037 FAM212B antisense RNA 5  
ENSG0000018035.9 -1.26582 5.0853442 1.41E-16 6.68E-05 10.12 11.2 0.95 585 ZNF48 zinc finger protein 48  
ENSG0000027424.1 -6.645897 -2.1103563 1.05E-06 6.02E-06 0.61 0.71 0.43 0 C17A-23H9.1 --  
ENSG0000017698.16 1.55164432 1.0414457 0.001051 0.00042187 0.17 0.21 0.08 081 ARL1 arylglycerol ether phosphatase 1  
ENSG0000079337.14 -6.0127459 385992526 8.04E-53 1.33E-50 2.42 2.76 0.06 005 RABGEF3 Rap guanine nucleotide exchange factor (GEF) 3  
ENSG0000027296.1 4.9099898 -1.2560165 9.32E-07 5.05E-07 0.17 0.15 0.14 015 RP3-405J01 --  
ENSG0000016463.11 3.1318625 -0.2254758 6.27E-10 5.63E-09 0.02 0.01 0.11 023 CREBRF CREBB3 regulatory factor  
ENSG00000134569.8 -1.8978365 48730874 1.92E-10 1.85E-09 4.46 4.48 0.01 163 LRPA long density lipoprotein receptor-related protein 4  
ENSG0000010389.13 1.2086468 2.97823525 7.05E-06 9.20E-02 1.23 1.74 4.68 443 ELMO3 ena and cdc1201  
ENSG00000157259.6 0.07005184 3.76683846 0.0003709 0.0011716 2.02 2.18 0.21 658 GATAD1 GATA zinc finger domain containing 1  
ENSG0000027507.1 1.79818704 1.40558697 2.00E-07 1.29E-06 0.15 0.17 0.85 062 RP11-150J01 --  
ENSG0000017261.8 7.7471595 1.2961932 6.01E-12 6.93E-11 0.07 0.15 0 0 LRRC15 leucine rich repeat containing 15  
ENSG00000163848.17 349786466 1.0414625 7.68E-19 1.69E-17 0.04 0.03 0.46 057 ZNF148 zinc finger protein 148  
ENSG0000017457.3 1.8631947 2.7449665 3.55E-09 2.90E-08 0.42 0.53 1.8 283 MSU2 male-specific lethal 2 homolog (Drosophila)  
ENSG00000277200.1 2.6125327 -2.8400256 0.0523173 0.0483895 0.08 0.02 0.02 0 RP11-742Z01 --  
ENSG00000164542.11 2.16589548 -0.022613 7.83E-07 2.48E-07 0.03 0.05 0.16 032 KIAA0895 KIAA0895  
ENSG0000014127.9 3.8504859 0.9775949 9.88E-11 5.26E-17 0.03 0.01 0.28 041 RRM1 5'-3' exonuclease 1  
ENSG00000161544.8 3.3084212 -0.3991727 1.04E-09 9.04E-09 0 0 0 048 CUGBP cytoplasmic  
ENSG0000018907.12 9.94074378 4.75947298 4.99E-81 3.42E-78 0.01 0.03 29.41 2452 VTN vitronectin  
ENSG0000010389.13 1.6974622 6.3201273 1.95E-09 3.56E-08 13.81 15.69 5.21 703 TSC2D1 TSC22 domain family, member 1  
ENSG00000188342.10 107190177 2.27004177 0.0006513 0.00222977 0.49 1.73 2.19 403 GTF2F2 general transcription factor, II, polypeptide 2, 30kDa  
ENSG00000162542.12 4.09283183 0.74476242 6.63E-19 1.48E-17 0.01 0.02 0.29 028 REL v-rel avian reticuloendotheliosis virus oncoprotein homolog  
ENSG0000013446.7 1.329429 3.6689213 6.92E-06 9.98E-06 16.37 14.13 8.06 14 SPAL1  
ENSG0000010795.7 2.14054805 1.34847687 1.50E-09 1.28E-08 0.1 0.11 0.49 075 RABGEF2 Rap guanine nucleotide exchange factor (GEF) 2  
ENSG0000015217.15 -9.2152067 0.17699174 1.59E-24 5.30E-23 0.17 0.16 0 0 SETBP1 SET binding protein 1  
ENSG00000126719.1 4.8989381 -3.0561133 0.0889063 0.0451857 0.07 0.04 0.04 004 RP11-159H18 --  
ENSG0000015311.11 -1.644927 -0.6959825 0.00042865 0.00015894 0.11 0.05 0.03 004 CDH6 cadherin 6, type 2, K-cadherin (fetal kidney)  
ENSG00000153790.1 1.7839284 0.7179966 0.0010606 0.0004253 0.03 0.03 0.3 032 CTNBL3 chromosome 7 open reading frame 31  
ENSG0000024067.6 1.2526931 0.0791876 1.47E-09 5.52E-22 0.19 0.15 0 0 SPB22 SC-like with four mitr domains 2  
ENSG00000130207.3 303022471 0.5783872 8.63E-12 9.76E-11 0.04 0.05 0.46 048 ZNF611 zinc finger protein 611  
ENSG0000028095.6 1.463929 2.8542079 0.00000000 0.00000000 0.12 0.12 0.42 819 ZSABR9 proteasome (prosome, macropain) subunit, beta type, 9  
ENSG0000013993.5 2.23630613 -0.469451 3.89E-06 2.04E-05 0.08 0.03 0.23 048 ALG10 ALG10, alpha-1,2-glucosyltransferase  
ENSG0000013584.9 1.22289508 1.47181053 0.00021399 0.00069549 0.29 0.02 0.73 079 ZBTB46 zinc finger and BTB domain containing 46  
ENSG0000014115.15 4.52226 1.696466 4.71E-15 6.66E-06 0.01 0.01 0.2 484 THSLD2 thymocyte-specific leucine-rich repeat domain containing 2  
ENSG0000015943.12 1.81757579 1.05831499 3.01E-08 2.15E-07 0.13 0.29 0.78 121 ORC4 origin recognition complex, subunit 4  
ENSG0000046089.3 -1.9624798 1.7588929 3.98E-09 3.24E-08 1.46 1.5 0.05 046 RP11-115CZ --  
ENSG0000021776.9 3.7534616 4.18837472 1.21E-07 8.84E-07 0.07 0.08 2.73 321 ACR8 aquarius intron-binding splicingfactor  
ENSG000004628.5 -7.095607 -1.758715 1.16E-08 8.76E-08 0.11 0.24 0 0 CASC8 cancer susceptibility candidate 8 (non-protein coding)  
ENSG00000238429 1.2653701 1.4120381 0.00017745 0.00070659 1.13 0.98 3.21 357 PFD ATP synthase (F1) subunit 6  
ENSG0000017524.13 1.3317683 0.19719 1.97E-19 4.54E-07 0.07 0.08 0.4 078 ATRF1 ATRF and PZD domain containing 1  
ENSG0000074960.18 5.97010963 2.4417479 8.84E-05 0.00034052 0 0 0.06 003 FRMPD1 FERM and PZD domain containing 1  
ENSG0000018546.10 1.46397586 3.3358923 0.00000000 0.00000000 0.01 0.01 0.2 299 PNB1A AMP response element binding protein 2  
ENSG0000018260.13 1.41048259 1.55452776 2.56E-05 0.00011523 0.11 0.22 0.44 071 RERL1 AMP response element binding protein 2  
ENSG0000073926.5 2.14135787 1.42248008 1.34E-09 1.15E-08 0.17 0.18 0.14 115 088 3-Mar membrane-associated ring finger (CHC4) 3, E3 ubiquitin protein ligase  
ENSG0000014127.13 1.62680297 0.00000000 0.00000000 0.00000000 2.17 2.32 7.02 1137 RRP25A ribonuclease P, subunit 5  
ENSG0000023123.9 -2.2186603 -0.6129171 2.53E-06 1.37E-05 1.19 1.26 0.25 045 CTXK1D2 Ctxk1 domain containing 2  
ENSG0000019753.1 -1.506015 -0.065979 0.00028988 0.0105871 17.96 13.36 6.86 778 SNOHD104 small nuclear RNA, C/D box 104  
ENSG00000180015.6 2.0718142 0.0130386 0.03477346 0.01 0.01 0.3 001 CA13 carbonic dehydratase XII  
ENSG0000018171.15 1.1660985 2.28062667 0.00021888 0.00081477 0.3 0.43 0.71 147 SCP2 sterol carrier protein 2  
ENSG0000012526.13 1.1281029 1.60022213 0.0006127 0.00210918 0.68 0.47 1.41 197 NSG52 insulin induced gene 2  
ENSG0000017595.14 3.848511 2.388366 8.84E-06 0.00034052 0.01 0.01 0.3 012 ZNF225 zinc finger protein 225  
ENSG0000017819.12 -1.6689676 2.7234904 5.24E-26 1.92E-24 1.68 1.77 0.16 02 PAQR5 progestin and androQ receptor family member V  
ENSG0000017595.14 1.6991484 1.6561305 0.00000000 0.00000000 484.42 210.29 210.29 210.29 ZNF213 ZNF213  
ENSG0000026990.2 2.6377892 -2.176959 0.0050654 0.0152094 0 0.02 0.03 02 RP11-228H13 --  
ENSG0000015453.12 3.811697 5.94221362 2.09E-08 1.52E-07 33.81 33.97 14.85 1399 APM1 acetylerylenolase O-methyltransferase-like  
ENSG0000018701.13 -7.9601882 1.94306132 3.05E-46 3.43E-44 2.13 2.96 0 0 NCF2 neurokinin cytosolic factor 2  
ENSG00000194216.10 -0.263891 9.8304671 2.67E-12 3.02E-11 333.95 301.25 100.77 10177 RAK1 interleukin 1 receptor-associated kinase 1  
ENSG0000046768.11 1.3549776 2.061461 1.76E-06 1.05E-05 1.18 0.29 0.13 013 RRP13A1 ribonuclease P, subunit 3A  
ENSG0000021093.1 -3.313687 -2.795589 0.0043894 0.02469931 2.14 0 0.26 0 SNOART7 small nuclear RNA, H/ACA box 77  
ENSG0000016801.10 4.33011328 -1.0518339 6.30E-09 4.98E-08 0.01 0.01 0.16 045 CDDC126 coiled-coil domain containing 126  
ENSG00000159175.17 1.2358614 3.2883263 1.75E-06 2.26E-05 0.09 0.25 0.3 219 TMEM423 transmembrane protein 23  
ENSG0000017459.5 -5.6565858 -2.783992 0.0008568 0.0028128 0.09 0.06 0 0 TRAM1L1 translocation-associated membrane protein 1-like 1  
ENSG0000010559.1 1.9473469 1.85111738 6.22E-09 4.52E-08 0.77 0.57 3.23 366 RASD1 RAS, desmethionine-induced 1  
ENSG00000254863.15 3.616357 1.8076493 1.97E-06 3.09E-07 1.84 1.94 0.4 184 GAL4 galactose 4-epimerase  
ENSG0000026149.1 3.39014446 -2.4342036 0.0019023 0.00894723 0 0.01 0.02 011 RP11-446G1 --  
ENSG0000012218.8 1.6253111 -1.8224941 0.00000000 0.00000000 0.01 0.01 0.08 026 GRP93 G protein-coupled receptor 63  
ENSG0000021854.6 3.58952926 -2.368871 0.0003832 0.00140265 0 0.01 0.08 006 LRRC4 leucine rich repeat containing 4  
ENSG00000134463.13 10.044905 4.03872903 5.32E-75 2.77E-72 18.12 14.23 0.04 0 ECHOC3 enoyl CoA hydratase domain containing 3  
ENSG0000023297.3 2.86168 2.587724 0.010923 0.00584723 0.12 0.02 0.44 012 CCL22 C-C motif ligand 27  
ENSG0000027470.1 2.0798147 0.379546 2.30E-07 1.46E-06 0.03 0.26 0 0 RP11-34F20 --  
ENSG0000015482.15 -1.2443925 4.655844 1.29E-06 7.28E-06 5.65 6.4 3.16 281 TCER1 transcription elongation factor (B) SII, polypeptide 1 (15kDa, elongin C)  
ENSG0000017766.14 1.785886 1.881401 1.09E-06 1.10E-05 0.67 0.63 0.21 2431 PNR1A2 protein kinase, domain containing 2  
ENSG000009370.18 1.34609062 -1.0113928 0.00917505 0.0241697 0.06 0.03 0.12 01 SH2D3C SH2 domain containing 3C  
ENSG0000016825.12 -11.164362 8.6466478 1.99E-129 1.59E-125 172.46 178.9 0.13 007 ANRP6 arylamidase related aminocyclotriase  
ENSG0000017453.6 0.0947819 1.43131 4.31E-10 4.31E-10 0 0.1 0.1 033 NMMLK1 NM1 serine/threonine protein kinase  
ENSG0000074317.9 6.04022639 2.3981409 8.36E-05 0.00034052 0 0 0.16 017 SDCB synendrin, beta  
ENSG0000025437.7 1.82929025 3.1279859 0.00000000 0.00000000 0.1 0.36 0.1 066 SPAT45 spermatogenesis associated 5  
ENSG0000018837.13 -1.7292191 3.1867309 1.86E-08 1.37E-07 4.67 4.23 2.12 145 P29 zona pellucida glycoprotein 3 (apern receptor)  
ENSG0000022657.1 1.86989634 -1.068158 0.0009149 0.00303221 1.11 2.76 11.22 794 SNOHD57 small nuclear RNA, C/D box 57  
ENSG0000025687.5 0.4358926 2.092632 2.97E-05 0.00012385 0.44 0.37 0.17 216 ZNF432 zinc finger protein 432  
ENSG0000017159.14 -2.2566697 3.2382533 4.29E-12 5.01E-11 1.03 1.2 0.36 026 FRMP1 FERM domain containing 3  
ENSG0000017027.13 -2.4758137 1.48181787 1.88E-12 2.30E-11 0.29 0.33 0.07 008 KIAA1549L KIAA1549-like 2  
ENSG0000020254.9 1.4949491 3.8117819 0.0045484 0.0116026 1.47 2.26 0.26 233 TMEM423 transmembrane protein 231  
ENSG0000017425.9 1.46560163 3.58833538 1.14E-06 6.47E-06 0.43 0 0.7 267 PAWR PRKC, apoptosis, WT1, regulator  
ENSG0000013011.7 5.4507274 -2.7484288 0.0015808 0.00495521 0.07 0 0.02 077 HNSL2 HNS-like 2  
ENSG0000016447.16 1.7446619 4.13185294 6.01E-09 4.78E-08 1.73 1.73 0.17 045 TNKS2 telomerase Xb  
ENSG0000018118.14 1.11930314 2.6765157 0.0027482 0.0010781 0.33 0.46 0.95 133 CSNK1G1 casein kinase 1, gamma 1  
ENSG0000012897.14 1.163381 1.7477784 1.44E-07 2.15E-07 0.33 0.33 0.13 071 TMEM50A transmembrane protein 50A  
ENSG0000023967.6 -1.458404 8.6487584 4.84E-07 2.93E-06 268.2 213.77 118.8 11502 NMEL1 NMEN/ME2 nucleoside diphosphate kinase 1  
ENSG00000145416.12 -5.3742332 -2.946728 0.0290522 0.00856312 0.02 0.02 0 0 0 1-Mar membrane-associated ring finger (CHC4) 1, E3 ubiquitin protein ligase  
ENSG0000023423.11 0.2861839 0.7418822 2.00E-06 6.47E-07 0.57 0.54 0.1 053 KCHN1A1 KCHN1 intronic transcript 1  
ENSG0000042619.4 -6.5075175 -2.212527 3.03E-06 1.62E-05 0.08 0.09 0 0 PAD03 peptidyl arginine deiminase, type III  
ENSG00000258137.4 -5.5249898 -2.861856 0.0005888 0.00495521 0.09 0.21 0 0 RP11-753H1 --  
ENSG0000023194.7 3.9407355 2.4158472 1.701E-10 9.29E-09 0.16 0.16 0.1 017 PPP1R3B protein phosphatase 1, regulatory subunit 3B  
ENSG0000016407.11 2.3770096 3.6134462 2.76E-14 4.10E-13 0.8 0.52 4.8 439 MST1R macrophage stimulating 1 receptor  
ENSG0000013843.15 2.1201336 3.5235326 7.07E-12 8.05E-11 0.59 0.71 2.68 495 SFA2 sperin specific antigen 2  
ENSG0000013807.9 1.6317929 1.64683389 2.42E-05 0.0001088 0.01 0.01 0.46 012 ZNF189 zinc finger protein 189  
ENSG0000013998.13 1.6763717 2.57329044 1.16E-07 7.74E-07 0.35 0.85 2.6 247 RAB15 RAB15, sperm specific antigen 2  
ENSG0000013459.7 1.919099 1.333843 4.06E-06 2.12E-05 0.12 0.18 0.6 11 SLC5A5 solute carrier family 35, member A5  
ENSG0000017435.11 1.9258516 1.42961536 1.29E-06 1.03E-05 0.08 0.14 0.08 118 RAB12 RAB12, small GTPase family 1, group D, member 2  
ENSG0000012288.11 1.34538921 4.07806813 5.84E-06 2.96E-05 2.89 2.25 7.88 994 PAH41 poly(A)-hydroxylase, alpha polypeptide 1  
ENSG0000023386.9 5.1570205 0.00000000 0.00000000 0.00000000 0.5 0.7 0.1 005 ARHGAP10 ARHGAP10, GTPase-activating protein 10  
ENSG0000015430.11 8.50015883 -0.356803 6.57E-17 1.23E-15 0 0 0.34 045 PGM5 phosphocholyltransferase 5  
ENSG0000027509.1 -2.624084 -2.645415 0.00552196 0.01522223 0.22 0.05 0.01 005 RP11-421M1 --  
ENSG0000016289.9 1.0103788 1.0533246 1.02E-06 6.93E-06 0.01 0.02 0.1 010 LR2 leucine-rich repeat domain containing 2  
ENSG0000013030.8 8.9552119 -2.4689818 0.00014842 0.00057423 0 0 0.12 003 CACR2A calcium release activated channel regulator 2A  
ENSG0000027987.2 5.60914027 -2.654552 0.0004761 0.00167191 0 0 0.02 002 LINC01126 long intergenic non-protein coding RNA 1126  
ENSG0000015710.10 1.63489174 4.85E-05 1.32E-05 1.13 1.1 0.1 017 SPANL1 tetraspanin 1  
ENSG0000023390.2 1.0989546 -0.668128 0.02038174 0.0423885 0.26 2.17 0.9 29 ZNF851.4 --  
ENSG0000013181.16 3.877173 -0.352004 5.51E-12 6.39E-11 0.03 0.03 0.4 005 EDC1 endothelial acid induced 2  
ENSG0000017040.16 -4.2182524 -0.228042 2.25E-15 3.83E-14 0.03 0.03 0.1 005 EDN1 endothelin 1  
ENSG0000015171.17 2.3642369 2.97934365 1.46E-13 1.99E-12 0.33 0.49 1.88 377 ZMYND11 zinc finger, MYND-type containing 11  
ENSG0000024200.5 1.9421391 0.1449685 1.98E-07 2.7E-06 0.54 0.16 0.48 088 RP11-378F4 --  
ENSG0000022602.9 1.14341949 -0.7801409 0.00340877 0.00991568 0.07 0.07 0.2 029 RPA-78A10.1 --  
ENSG0000023675.4 7.06681771 -1.59382 7.81E-09 5.62E-08 0 0 0.26 029 AC009013.3 --  
ENSG0000016872.8 2.9042005 -2.7238075 0.0043981 0.02468949 0.04 0.01 0.1 0 GRIK3 glutamate receptor, ionotropic, kainate 3  
ENSG000002367.2 -2.6256661 -1.5270823 6.51E-05 0.00027249 0.51 0.06 0.07 006 RP11-26AB1 --  
ENSG0000010306.1 2.4803157 4.6633869 5.95E-16 1.03E-14 1.41 1.82 12.64 1137 ESRP2 epithelial splicing regulatory protein 2  
ENSG0000013097.15 2.4839207 -2.404448 0.0077015 0.01377884 0.05 0.12 0.14 003 PCOLCE phospholipase C, epsilon (DNA directed)  
ENSG0000024000.1 4.87917439 -3.067869 0.0188873 0.04519557 0 0 0 0 RP11-200A1 --  
ENSG0000019714.9 6.9672829 -1.882574 3.73E-07 2.30E-06 0 0 0.02 02 GPR98 G protein-coupled receptor 68  
ENSG0000027452.1 3.139633 2.6266272 0.00000000 0.00000000 0.06 0.06 0.1 88 RP5-115E3.1 --  
ENSG0000016609.13 22.079923 1.12610947 6.82E-10 6.90E-09 0.31 0.3 0.23 157 ATP6V1B1 ATPase, H+ transporting, isoform 56/58kDa, V1 subunit B1  
ENSG0000013792.13 2.2877363 1.5706068 1.03E-06 1.37E-06 0.08 0.08 0.2 125 RBT RBT, small GTPase family 1, group D, member 2  
ENSG0000016851.16 1.7592317 3.93799174 1.83E-11 6.9E-10 35.4 28.6 11.6 1073 GINS1 glycerol inducible 3 (beta, meido)  
ENSG0000021270.10 1.14374474 0.7993205 7.09E-05 0.00029385 0.3 0.53 0.12 014 RECK reversion-inducing-cysteine-rich protein with kazal motifs  
ENSG0000027449.1 3.3942655 -0.514572 1.95E-11 9.1E-10 0.83 1.11 0.01 011 RP3-395M2 --  
ENSG0000018308.11 1.5837784 2.76190026 3.79E-07 2.34E-06 0.39 0.63 2.15 186 GDRGPI GDP-D-glucose phosphorilase 1  
ENSG0000013867.9 1.3024129 2.14569398 4.45E-05 0.00019373 1.11 1.16 3.5 397 SLC12A2 solute carrier family 13 (copper transporter), member 2  
ENSG0000013292.10 2.7187825 3.0487442 2.86E-10 2.24E-09 0 0.26 0.13 113 VSTML1 vesicle trafficking modulator 1  
ENSG0000013449.12 -1.0482178 2.99505046 0.0004412 0.00189066 3.2 2.45 2.32 231 TMEM421 transmembrane protein 241  
ENSG0000026079.2 2.39261217 -0.161008 2.77E-07 1.73E-06 0.03 0.18 0.01 055 RP5-882C2.2 --  
ENSG0000023017.5 1.0304248 2.6562433 0.0043894 0.02468921 0.04 0.01 0.1 008 AS44829.2 --  
ENSG00000119514.6 -2.0400849 -2.128309 0.0061421 0.01678995 0.08 0.09 0 005 GALNT12 polypeptide N-acetylglucosaminyltransferase 12  
ENSG0000014842.15 2.6523634 0.21571516 1.68E-09 1.44E-08 0.13 0.1 0.46 15 GLAN1 glutamine 19 open reading frame 33  
ENSG0000016744.10 -1.634801 1.844

|                    |             |            |            |            |        |       |       |       |              |                                                                              |       |                |
|--------------------|-------------|------------|------------|------------|--------|-------|-------|-------|--------------|------------------------------------------------------------------------------|-------|----------------|
| ENSG0000080707.10  | -1.0654649  | 751.295626 | 0.00021033 | 0.00079194 | 101.57 | 88.23 | 0.11  | 59.78 | TRIP6        | thyroid hormone receptor interactor 6                                        | chr7  | protein_coding |
| ENSG0000080802.1   | -0.9437013  | -0.8540328 | 1.70E-16   | 1.0E-15    | 0.4    | 0.44  | 0.1   | 0     | CTD-202421   | CTD-202421                                                                   | chr7  | lncRNA         |
| ENSG0000075783.1   | 5.46945885  | -2.7387023 | 0.0018008  | 0.0049521  | 0      | 0     | 1.07  | 0.91  | FP236383.5   | mRNA                                                                         | chr21 | mRNA           |
| ENSG0000018887.14  | -5.6764839  | 1.16227789 | 8.97E-30   | 4.10E-28   | 1.59   | 1.97  | 0.06  | 0.03  | MP2          | myelin protein zero                                                          | chr7  | protein_coding |
| ENSG0000060877.1   | -2.4717321  | -2.1147493 | 0.0017351  | 0.0001306  | 0.3    | 0.57  | 0.04  | 0.07  | RP11-221621  | RP11-221621                                                                  | chr11 | lncRNA         |
| ENSG0000024964.1   | 5.4645977   | -2.7413886 | 0.0018008  | 0.0049521  | 0      | 0     | 0.34  | 0.04  | RP11-28801   | RP11-28801                                                                   | chr18 | lncRNA         |
| ENSG0000018032.19  | 2.1552047   | 2.7039542  | 1.70E-11   | 1.88E-10   | 0.36   | 0.35  | 1.72  | 2.51  | PFM18        | protein phosphatase, Mg <sup>2+</sup> /Mn <sup>2+</sup> -dependent, 18       | chr2  | protein_coding |
| ENSG0000015365.1   | 2.9554497   | -2.0718498 | 0.0018074  | 0.0058243  | 0.38   | 0.57  | 0.04  | 0.14  | RP11-332215  | RP11-332215                                                                  | chr5  | lncRNA         |
| ENSG00000164251.4  | 1.86451     | 0.7813657  | 6.28E-07   | 3.73E-06   | 0.13   | 0.26  | 0.97  | 0.93  | FZRL1        | coagulation factor II (thrombin) receptor-like 1                             | chr5  | protein_coding |
| ENSG0000015396.15  | 1.4792567   | 2.5945439  | 2.32E-06   | 1.27E-05   | 0.42   | 0.28  | 0.93  | 1.69  | HCS21        | heparan sulfate 2-O-sulfotransferase 1                                       | chr9  | protein_coding |
| ENSG0000022786.18  | 4.5929657   | 4.5929657  | 7.74E-01   | 6.02E-08   | 1.57   | 0.41  | 0.04  | 7.98  | CALD1        | caldesmon                                                                    | chr7  | protein_coding |
| ENSG0000008773.13  | 2.5762952   | 0.96367071 | 2.46E-11   | 2.63E-10   | 0.04   | 0.04  | 0.22  | 0.4   | ADAM22       | ADAM metalloproteinase domain 22                                             | chr7  | protein_coding |
| ENSG0000013214.12  | 1.79227752  | -0.8642871 | 7.40E-09   | 4.48E-11   | 0.03   | 0     | 0.41  | 0.99  | CTRB         | chaperonin containing TCP1, subunit 8B (beta 2)                              | chr17 | protein_coding |
| ENSG00000221909.2  | 1.9918374   | -0.4646058 | 6.23E-05   | 0.00026157 | 0.08   | 0.07  | 0.12  | 0.65  | FAM200A      | family with sequence similarity 200, member A                                | chr7  | protein_coding |
| ENSG00000272217.1  | 6.03134248  | -2.373212  | 8.36E-05   | 0.00034052 | 0      | 0     | 0.32  | 0.55  | Xbaec-2P1G2  | family with sequence similarity 200, member A                                | chr7  | lncRNA         |
| ENSG00000215018.9  | 3.0011668   | 2.8722499  | 0.0043844  | 0.02469031 | 0.01   | 7.04  | 0.03  | 0.05  | COL3A1       | collagen, type XVIII, alpha 1                                                | chr7  | protein_coding |
| ENSG00000265967.1  | -5.3733592  | -2.9472019 | 0.00290522 | 0.00856312 | 0.29   | 0.15  | 0     | --    | AC100830.4   | --                                                                           | chr19 | antisense      |
| ENSG00000148346.10 | -1.03959371 | 2.42531572 | 1.11E-19   | 2.60E-18   | 5.83   | 9.94  | 1.12  | 1.12  | LCN2         | lipocalin 2                                                                  | chr5  | protein_coding |
| ENSG00000166333.18 | 1.9847875   | 5.7076074  | 1.69E-06   | 9.45E-06   | 1.9    | 2.1   | 7.8   | 6.14  | NANV2        | neuron navigator 2                                                           | chr16 | protein_coding |
| ENSG00000104976.10 | -1.0848489  | 4.6862633  | 0.0001986  | 0.0007508  | 15.74  | 18.51 | 11.38 | 10.09 | SNAPC2       | small nuclear RNA activator complex, polypeptide 2, 45kDa                    | chr19 | protein_coding |
| ENSG0000015750.15  | 3.30345321  | 0.4960372  | 5.69E-14   | 8.14E-13   | 0.13   | 0.02  | 0.85  | 1.25  | YAF18        | TATA box binding protein (TBP)-associated factor, RNA polymerase I, B, 63kDa | chr19 | protein_coding |
| ENSG00000184441.4  | 4.9302098   | 3.2289176  | 8.40E-39   | 6.00E-37   | 0.15   | 0.07  | 4.65  | 4.19  | AP001052.7   | --                                                                           | chr1  | antisense      |
| ENSG00000126709.13 | 1.6989505   | 5.51111022 | 7.80E-09   | 6.06E-08   | 20.01  | 20.12 | 90.88 | 82.42 | IF6          | interferon, alpha-inducible protein 6                                        | chr1  | protein_coding |
| ENSG0000043375.13  | 3.2538894   | 1.7534549  | 1.76E-23   | 5.47E-22   | 0.44   | 0.52  | 0.72  | 4.4   | CGN          | cuticular                                                                    | chr2  | protein_coding |
| ENSG00000121864.8  | 2.40171484  | 1.7196427  | 8.01E-11   | 1.03E-10   | 0.03   | 0.5   | 0.72  | 0.82  | DNFB39       | zinc finger protein 639                                                      | chr2  | protein_coding |
| ENSG00000207697.11 | 1.27321211  | 2.88729426 | 3.21E-05   | 0.00014208 | 1.45   | 1.79  | 3.5   | 6.99  | FNCR1        | interferon gamma receptor 1                                                  | chr2  | protein_coding |
| ENSG00000171634.15 | 2.808275    | 4.0308127  | 5.67E-19   | 2.7E-17    | 0.21   | 0.28  | 2.32  | 3.16  | PTP          | broctodomain PTP finger transcription factor                                 | chr17 | protein_coding |
| ENSG00000153310.17 | 1.0221895   | 3.48231201 | 0.00518674 | 0.00196697 | 1.17   | 1.52  | 0.66  | 4.69  | FAM49B       | family with sequence similarity 49, member B                                 | chr6  | protein_coding |
| ENSG00000081721.10 | -1.0717759  | 3.83790167 | 0.00017905 | 0.00068195 | 12.99  | 11.85 | 7.21  | 8.17  | DUSP12       | dual specificity phosphatase 12                                              | chr7  | protein_coding |
| ENSG0000026380.6   | 0.0256946   | 0.0188949  | 4.62E-14   | 6.87E-13   | 0.04   | 0.03  | 0.35  | 0.23  | AC068781.1   | --                                                                           | chr7  | lncRNA         |
| ENSG00000152133.13 | 2.76880712  | 1.6072993  | 1.72E-14   | 2.61E-13   | 0.14   | 0.17  | 0.91  | 1.93  | GPATCH11     | G patch domain containing 11                                                 | chr7  | protein_coding |
| ENSG0000023479.1   | -2.085359   | -1.89688   | 0.00030791 | 0.00892022 | 0.18   | 0.48  | 0.07  | 0.12  | AP000656.6   | --                                                                           | chr21 | antisense      |
| ENSG00000112742.8  | 4.9838229   | 0.285716   | 6.10E-09   | 4.83E-08   | 0.04   | 0.3   | 0.25  | 0.82  | TKT          | protein kinase                                                               | chr6  | protein_coding |
| ENSG00000187908.14 | -1.0565521  | 1.60021249 | 1.14E-41   | 9.44E-40   | 0.69   | 0.53  | 0     | 0     | DMBT1        | deleted in malignant brain tumors 1                                          | chr6  | protein_coding |
| ENSG0000017448.14  | 1.7758456   | 0.153807   | 7.89E-06   | 3.91E-05   | 0.24   | 0.15  | 0.94  | 0.09  | CFEB2        | cytoplasmic polyadenylation element binding protein 2                        | chr1  | protein_coding |
| ENSG0000013961.13  | 1.6947465   | 2.76315979 | 2.03E-08   | 1.49E-07   | 0.58   | 0.83  | 2.35  | 3.75  | ATP2B1       | ATPase, Ca++ transporting, plasma membrane 1                                 | chr12 | protein_coding |
| ENSG00000125952.10 | 2.2193899   | 0.21179251 | 1.95E-07   | 1.26E-06   | 0.04   | 0.08  | 0.04  | 0.42  | USPL1        | ubiquitin specific peptidase like 1                                          | chr13 | protein_coding |
| ENSG00000122139.16 | -0.7834041  | 0.011111   | 2.12E-29   | 2.12E-29   | 0      | 0     | 0     | 0     | EYAA         | eyaminophen coactivator and phosphatase 4                                    | chr6  | protein_coding |
| ENSG0000033328.3   | -5.36045    | -1.3272891 | 5.48E-10   | 4.95E-09   | 1.01   | 0.53  | 0.04  | 0     | HRASL2       | HRAS-like suppressor 2                                                       | chr11 | protein_coding |
| ENSG00000119900.7  | 1.2943869   | 0.0250967  | 0.0002545  | 0.0003987  | 0.07   | 0.15  | 0.23  | 0.48  | OGFR1        | onco growth factor receptor-like 1                                           | chr6  | protein_coding |
| ENSG00000198730.6  | 1.6302729   | 0.0696213  | 1.27E-07   | 1.27E-07   | 2.61   | 2.61  | 1.8   | 18    | CTRP         | CTRP RNA polymerase II core component                                        | chr16 | protein_coding |
| ENSG00000117411.15 | -1.968073   | 5.8989449  | 2.93E-11   | 3.11E-10   | 27.28  | 24.54 | 8.92  | 8.73  | BGALG12      | UDP-Galactose 4-epimerase 1, 4-galactose-3-epimerase, polypeptide 2          | chr7  | protein_coding |
| ENSG00000094313.4  | 3.0209163   | 1.0439251  | 2.04E-14   | 3.07E-13   | 0.02   | 0.04  | 0.26  | 0.4   | REV3L        | REV3-like, polymerase (DNA directed), zeta, catalytic subunit                | chr6  | protein_coding |
| ENSG00000122910.13 | 1.0251681   | 1.8789328  | 0.0001384  | 0.00106734 | 12.56  | 12.56 | 23.32 | 23.32 | GGH          | gamma-glutamyl hydrolase (conjugase, folylpolyglutaminylation hydrolase)     | chr1  | protein_coding |
| ENSG00000260257.2  | 1.8172673   | 0.3166494  | 5.40E-06   | 2.75E-05   | 0.19   | 0.12  | 0.96  | 0.87  | RPS-1085F1   | zinc finger protein 630                                                      | chr20 | lncRNA         |
| ENSG00000221994.9  | 1.6549446   | 0.1066655  | 6.51E-05   | 0.00027249 | 0.16   | 0.11  | 0.31  | 0.81  | ZNFB50       | zinc finger protein 630                                                      | chrX  | protein_coding |
| ENSG0000018561.7   | -1.3759579  | 4.9197181  | 1.27E-07   | 8.44E-07   | 0.48   | 0.69  | 0.12  | 4.11  | TNFAIP8L1    | tumor necrosis factor, alpha-induced protein 8-like 1                        | chr1  | protein_coding |
| ENSG00000055513.9  | 3.7539263   | -1.1764002 | 1.38E-11   | 1.53E-10   | 0      | 0     | 0.3   | 0.21  | SOXB         | SRY (sex determining region Y)-box 8                                         | chr16 | protein_coding |
| ENSG0000024783.2   | 0.01891     | -0.0350838 | 2.70E-05   | 0.00148851 | 0.06   | 0.07  | 0     | 0     | RP11-437A1   | --                                                                           | chr12 | lncRNA         |
| ENSG00000134326.10 | 8.8471319   | 1.9602138  | 5.66E-43   | 5.10E-41   | 0      | 0.01  | 1.44  | 2.71  | CMPK2        | cytidine monophosphate (UMP-CMP) kinase 2, mitochondrial                     | chr7  | protein_coding |
| ENSG0000018496.4   | 3.1063973   | 1.2781481  | 1.27E-15   | 2.15E-14   | 0.02   | 0.06  | 0.3   | 0.7   | FBXO30       | F-box protein 30                                                             | chr6  | protein_coding |
| ENSG00000252119.17 | 4.638948    | 1.8789527  | 6.49E-07   | 2.54E-06   | 0.45   | 0.49  | 0.19  | 1.51  | ARMDA4       | AT rich interactive domain 4A (RPI)-like 4                                   | chr2  | protein_coding |
| ENSG00000204387.11 | -1.2123684  | 5.16736124 | 1.40E-12   | 1.73E-11   | 29.3   | 23.18 | 7.45  | 8.65  | C6orf48      | chromosome 6 open reading frame 48                                           | chr6  | protein_coding |
| ENSG00000197978.9  | 4.1201672   | -1.2269365 | 9.32E-08   | 6.27E-07   | 0.02   | 0.06  | 0.3   | 0.59  | GOLGA9L      | golgin A6 family-like 9                                                      | chr16 | protein_coding |
| ENSG0000012467.15  | 7.7194601   | 1.753541   | 1.27E-09   | 1.27E-09   | 11.13  | 12.7  | 0.19  | 60.7  | SLC12A4      | solute carrier family 12 (potassium/chloride transporter), member 4          | chr1  | protein_coding |
| ENSG00000167981.5  | 1.78921672  | -0.1145621 | 3.43E-05   | 0.00015114 | 0.06   | 0.05  | 0.12  | 0.39  | ZNFS97       | zinc finger protein 597                                                      | chr15 | protein_coding |
| ENSG00000108448.19 | -1.3444642  | 4.6359991  | 7.07E-27   | 2.77E-25   | 36.63  | 33.19 | 4.5   | 4.5   | TRIM18       | triadite motif containing 18-like                                            | chr17 | protein_coding |
| ENSG0000013022.9   | 1.4944029   | 5.74E-09   | 4.56E-08   | 4.56E-08   | 0.12   | 0.09  | 0.89  | 0.66  | CACD2455     | growth arrest and DNA-damage-inducible, gamma                                | chr10 | protein_coding |
| ENSG00000128212.9  | -2.3541673  | 5.88227906 | 4.28E-15   | 6.87E-14   | 29.04  | 24.67 | 6.97  | 6.97  | STK32C       | serine/threonine kinase 32C                                                  | chr17 | protein_coding |
| ENSG00000268012.2  | 1.9463963   | -2.2627078 | 2.93E-05   | 0.0002094  | 0      | 0     | 0     | 0     | AC005822.12  | --                                                                           | chr1  | lncRNA         |
| ENSG00000224962.2  | 1.25301579  | 5.7876796  | 1.59E-05   | 7.41E-05   | 4.83   | 5.42  | 14.91 | 17.69 | DXSOS6       | exosome component 6                                                          | chr16 | protein_coding |
| ENSG0000042669.12  | -1.309037   | 6.9349614  | 6.91E-06   | 3.46E-05   | 79.38  | 78.89 | 4.07  | 38.33 | SH3BGRL3     | SH3 domain binding glutamate-rich protein kinase 3                           | chr1  | protein_coding |
| ENSG00000176024.15 | 1.6308996   | 0.0496214  | 1.27E-13   | 1.27E-13   | 0.36   | 0.36  | 0.36  | 0.69  | DNFB13       | SH3 finger protein 613                                                       | chr5  | protein_coding |
| ENSG0000033781.3   | -3.4479797  | -2.711395  | 0.00552196 | 0.0152223  | 0.44   | 0     | 0.05  | 0     | RP11-544A-2  | --                                                                           | chr1  | antisense      |
| ENSG00000172915.17 | 2.4178245   | 0.2348775  | 1.30E-08   | 9.76E-08   | 0.03   | 0.02  | 0.17  | 0.17  | NBEA         | neurabin                                                                     | chr13 | protein_coding |
| ENSG0000027789.1   | 1.9842929   | 0.0545217  | 6.25E-06   | 9.76E-05   | 0.48   | 0.48  | 0.04  | 1.04  | RP11-498B11  | --                                                                           | chr1  | lncRNA         |
| ENSG00000160188.8  | 1.99965494  | -0.379867  | 0.00010694 | 0.00010694 | 0.07   | 0.24  | 0.12  | 0.55  | RSPH1        | radial spoke head 1 homolog (Chlamydomonas)                                  | chr21 | protein_coding |
| ENSG00000259738.1  | 2.8955362   | -2.743604  | 0.01615662 | 0.03950166 | 0      | 0.03  | 0.2   | 0.14  | CR1C3-AS1    | CR1C3 antisense RNA 1                                                        | chr15 | antisense      |
| ENSG0000014527.10  | 2.9262746   | 4.5982532  | 1.27E-07   | 1.98E-12   | 1.4    | 1.4   | 0.2   | 14.2  | NTRV         | netrin 4                                                                     | chr1  | protein_coding |
| ENSG0000013899.16  | 3.11656881  | 1.4694317  | 1.74E-16   | 3.16E-15   | 0.13   | 0.17  | 1.38  | 2.08  | FASTKD1      | FAST kinase domains 1                                                        | chr2  | protein_coding |
| ENSG0000012319.8   | 3.72614052  | 5.1461679  | 1.27E-30   | 6.03E-29   | 1.55   | 1.68  | 27.46 | 29.47 | ICEA3        | transcription elongation factor A (SII) 3                                    | chr1  | protein_coding |
| ENSG0000044661.11  | 2.0468163   | 0.8618293  | 0.0002894  | 0.00089959 | 0.12   | 0.09  | 0.89  | 0.39  | NHPH1        | neurohypophyseal 1 (overline)                                                | chr2  | protein_coding |
| ENSG00000263008.1  | 3.2609881   | -1.128465  | 5.22E-07   | 3.15E-06   | 0.01   | 0.01  | 0.09  | 0.08  | AC011474.4   | --                                                                           | chr2  | lncRNA         |
| ENSG0000010774.16  | 1.02381     | 2.8593434  | 1.27E-07   | 0.00091028 | 0.33   | 0.33  | 0.12  | 0.39  | CNTNAP3      | contactin associated protein-like 3                                          | chr9  | protein_coding |
| ENSG0000015861.16  | 2.7854139   | 0.7897262  | 4.15E-12   | 4.86E-11   | 0.02   | 0.09  | 0.55  | 0.45  | EDA          | ectodysplasin A                                                              | chr7  | protein_coding |
| ENSG00000096812.10 | -3.3055798  | 2.59106911 | 4.95E-22   | 1.39E-20   | 1.92   | 1.35  | 0.22  | 0.22  | HES2         | hes family bHLH transcription factor 2                                       | chr1  | protein_coding |
| ENSG0000013504.18  | 1.3738977   | 0.0581772  | 2.70E-05   | 0.0002768  | 75.72  | 75.72 | 6.67  | 6.67  | SLC12AT      | solute carrier family 12 (potassium/chloride transporter), member 7          | chr1  | protein_coding |
| ENSG0000026328.1   | -1.2360316  | 1.7895445  | 6.58E-05   | 0.00027499 | 1.37   | 1.18  | 0.75  | 0.64  | RP11-416B2.1 | --                                                                           | chr17 | lncRNA         |
| ENSG0000016050.13  | -1.1210356  | 5.07482793 | 6.05E-06   | 3.08E-05   | 24.56  | 22.29 | 10.9  | 11.9  | CDC2B8       | coiled-coil domain containing 28B                                            | chr1  | protein_coding |
| ENSG0000016115.13  | -0.0146335  | 0.00013825 | 1.39E-13   | 0.00013825 | 0.4    | 0.4   | 0.02  | 0.21  | KE           |                                                                              |       |                |

|                    |            |            |            |            |        |        |        |        |               |                                                                         |       |                       |                |
|--------------------|------------|------------|------------|------------|--------|--------|--------|--------|---------------|-------------------------------------------------------------------------|-------|-----------------------|----------------|
| ENSG00000271157.1  | -5.377832  | -2.945107  | 0.029052   | 0.00856312 | 0.09   | 0.73   | 0      | 0      | HIST1H4D      | histone duster 1, H4d                                                   | chr6  | protein_coding        |                |
| ENSG00000108797.10 | -1.682118  | 0.854608   | 0.786707   | 0.000000   | 12.7   | 13.68  | 0      | 0      | 0             | centriac associated protein 1                                           | chr17 | protein_coding        |                |
| 21782481           | 1.57760707 | 0.459210   | 4.16E-09   | 0.000000   | 0.04   | 0.06   | 0.04   | 0      | 0.37 RPAP2    | RNA polymerase II associated protein 2                                  | chr1  | protein_coding        |                |
| ENSG0000025458.5   | -1.313646  | 3.7169298  | 5.55E-06   | 0.82E-05   | 143.45 | 136.08 | 78.49  | 0      | 71.17 NIT5C   | 5, S'-nucleotidase, cytosolic                                           | chr17 | protein_coding        |                |
| ENSG0000017240.12  | -1.330189  | 3.3354488  | 1.39E-11   | 0.000000   | 1.52   | 1.33   | 0.41   | 0.32   | 0.49 DYRK2B1  | dystrin cytoplasmic 2, brain chain 1                                    | chr1  | protein_coding        |                |
| ENSG0000013470.12  | 2.12671358 | 1.86E-12   | 2.27E-11   | 1.56       | 248    | 8.18   | 1548   | 8.18   | 1542 RKF23    | kinasin family member 23                                                | chr15 | protein_coding        |                |
| ENSG0000018451.1   | -2.865798  | -2.508961  | 0.0019023  | 0.0084733  | 0.04   | 0.11   | 0      | 0      | 0.02 SPAT1A2  | spermatogenesis associated 12                                           | chr2  | protein_coding        |                |
| ENSG0000011734.16  | -4.899172  | 2.451825   | 5.95E-37   | 3.80E-35   | 2.21   | 1.94   | 0.02   | 0.15   | 0.07 RNP1F    | BC12Z/adenovirus E1B 19kDa interacting protein                          | chr5  | protein_coding        |                |
| ENSG00000196723.9  | -1.603999  | -1.861355  | 0.00183219 | 0.04519657 | 0.04   | 0.08   | 0.08   | 0.08   | 0.08 C15orf45 | melanophilin                                                            | chr2  | protein_coding        |                |
| -1.4639524         | 3.026814   | 5.29E-07   | 3.18E-06   | 73.4       | 57.14  | 0.02   | 0.02   | 0.02   | 0.02 NUDT17   | chromosome 19 open reading frame 45                                     | chr19 | protein_coding        |                |
| ENSG00000204435.12 | -1.132414  | 7.492471   | 8.37E-05   | 0.00034109 | 133.92 | 145.32 | 90.69  | 78.39  | CNNK2B        | nucleic (nucleoside diphosphate linked moiety X)-type motif 1           | chr3  | protein_coding        |                |
| ENSG0000014454.18  | 1.967495   | 3.1767349  | 1.63E-07   | 1.58E-09   | 0.28   | 0.24   | 1.14   | 0.44   | PHL02B        | casein kinase 2, beta polypeptide                                       | chr6  | protein_coding        |                |
| ENSG00000273449.1  | 4.72703895 | 1.411721   | 0.0088973  | 0.04519657 | 0      | 0      | 0.21   | 0.03   | RP11-218F11   | pleckstrin homology-like domain, family 8, member 2                     | chr19 | protein_coding        |                |
| ENSG00000103490.16 | -1.831004  | 6.93442135 | 4.76E-10   | 4.34E-09   | 19.99  | 15.55  | 6.46   | 6.87   | WDR13         | Wdr repeat domain 13                                                    | chr4  | protein_coding        |                |
| ENSG0000026951.1   | 3.755543   | -1.874785  | 0.002536   | 0.00240222 | 0      | 0.02   | 0.06   | 0.15   | RP11-37010.1  | ...                                                                     | chr12 | lncRNA                |                |
| ENSG00000267165.1  | 5.33435105 | -2.818525  | 0.0029522  | 0.00856312 | 0      | 0      | 0.17   | 0.39   | RP11-78A19    | ...                                                                     | chr18 | antisense             |                |
| ENSG00000134108.11 | 1.65160345 | 2.77350211 | 1.16E-07   | 7.73E-07   | 0.8    | 0.95   | 2.87   | 4.5    | ARL8B         | ADP-ribosylation factor-like 8B                                         | chr3  | protein_coding        |                |
| ENSG00000202932.12 | -1.3673459 | 3.257407   | 5.87E-06   | 2.98E-05   | 4.54   | 3.83   | 2.24   | 2.08   | FLEKBP1       | pleckstrin homology domain containing, family O member 1                | chr1  | protein_coding        |                |
| ENSG00000137841.10 | -2.6389467 | 2.58037926 | 9.45E-16   | 1.61E-14   | 1.34   | 1.67   | 0.29   | 0.35   | PLCB2         | phospholipase C, beta 2                                                 | chr15 | protein_coding        |                |
| ENSG0000013448.13  | 2.49591172 | 3.81785738 | 1.25E-15   | 2.11E-14   | 1.29   | 1.43   | 10.61  | 9.89   | SEC14L4       | SEC14-like 4 (S. cerevisiae)                                            | chr22 | protein_coding        |                |
| ENSG0000018165.16  | 1.22188216 | 2.01871412 | 0.0013804  | 0.00535777 | 2.22   | 2.29   | 1.42   | 6.59   | TPST1G1       | TP53 target 1 (non-protein coding)                                      | chr12 | lncRNA                |                |
| ENSG00000163681.13 | 1.95033844 | 3.03828734 | 4.44E-10   | 4.08E-09   | 0.17   | 0.32   | 0.92   | 1.63   | SLMAP         | sarcolemmal associated protein                                          | chr12 | protein_coding        |                |
| ENSG00000189120.1  | 1.46389542 | -0.5389478 | 0.00170514 | 0.00531058 | 0.04   | 0.09   | 0.3    | 0.18   | SPB           | Scf transcription factor                                                | chr17 | protein_coding        |                |
| ENSG00000187101.13 | -2.543679  | 7.0626567  | 2.53E-12   | 2.95E-11   | 1.44   | 1.68   | 0.93   | 0.58   | SPN           | spinnin                                                                 | chr1  | protein_coding        |                |
| ENSG00000196369.9  | 1.46941901 | 0.894393   | 1.91E-05   | 0.00017073 | 0.07   | 0.14   | 0.37   | 0.42   | SRGA2B        | SLIT-ROBO Rho GTPase activating protein 2B                              | chr1  | protein_coding        |                |
| ENSG0000014265.12  | 2.5984034  | 0.6303688  | 1.44E-10   | 1.43E-09   | 0.02   | 0.07   | 0.24   | 0.45   | TP14          | TP14 zinc finger protein                                                | chr19 | protein_coding        |                |
| ENSG00000279742.1  | 2.08648906 | 0.52735659 | 1.64E-07   | 1.07E-06   | 0.11   | 0.24   | 0.85   | 1.13   | RP11-700A2    | ...                                                                     | chr11 | TEC                   |                |
| ENSG00000170316.6  | 5.12073474 | -0.380343  | 2.47E-14   | 3.69E-13   | 0.04   | 0      | 0.85   | 1.12   | EPHX4         | epoxide hydrolase 4                                                     | chr1  | protein_coding        |                |
| ENSG00000270571.1  | 1.292324   | 1.0313748  | 0.001755   | 0.0241887  | 1.05   | 1.63   | 0.34   | 1.07   | CTB-40154     | ...                                                                     | chr1  | protein_coding        |                |
| ENSG00000237862.1  | 7.15635911 | -1.52743   | 2.80E-09   | 2.31E-08   | 0      | 0      | 0      | 0.25   | RP11-63G57    | ...                                                                     | chr22 | sense_intronic        |                |
| ENSG00000008988.8  | -1.1591347 | 9.2508398  | 5.56E-05   | 0.0002582  | 29.77  | 24.41  | 143.12 | 156.96 | RPS20         | ribosomal protein S20                                                   | chr8  | protein_coding        |                |
| ENSG00000169230.8  | -1.478982  | 8.9252663  | 3.8E-19    | 8.32E-16   | 460.57 | 28.44  | 0      | 0.18   | PRLED1        | PR1 domain containing 1                                                 | chr9  | protein_coding        |                |
| ENSG00000270372.1  | -5.3787292 | -2.9446861 | 0.0029522  | 0.00856312 | 0      | 2.62   | 0      | 0      | 0             | RP11-109M1                                                              | ...   | chr8                  | antisense      |
| ENSG00000265800.1  | 1.8077201  | -0.985187  | 0.0318259  | 0.0433739  | 0.27   | 1.07   | 0      | 0.27   | RP11-645A1    | ...                                                                     | chr17 | sense_intronic        |                |
| ENSG00000178914.4  | 7.102992   | 4.341413   | 4.34E-06   | 1.59E-62   | 8.93   | 7.34   | 0.08   | 0.07   | OPH4X         | 5-oxoprolinase (ATP-hydrolyzing)                                        | chr7  | protein_coding        |                |
| ENSG0000018409.14  | 5.4282042  | 3.1419567  | 1.27E-42   | 1.11E-40   | 0.07   | 0.1    | 5.58   | 4.12   | ATP1A3        | ATPase, Na+/K+-transporting, alpha 3 polypeptide                        | chr19 | protein_coding        |                |
| ENSG00000156471.11 | -1.281647  | 0.945403   | 0.0013149  | 0.0026718  | 0.15   | 0.15   | 0.15   | 0.15   | 518 SAM68     | alpha alpha motif domain containing 8                                   | chr18 | protein_coding        |                |
| ENSG00000227372.9  | -6.7325666 | 4.50952147 | 1.63E-63   | 4.88E-61   | 4.86   | 5.3    | 0.06   | 0.07   | TP73-AS1      | TP73 antisense RNA 1                                                    | chr1  | lncRNA                |                |
| ENSG00000231566.1  | -1.925045  | -1.530873  | 0.0018575  | 0.00571918 | 1.14   | 0.91   | 0.34   | 0.36   | RPS11-118E1   | ...                                                                     | chr1  | antisense             |                |
| ENSG0000013506.13  | 1.4780689  | 1.83105928 | 7.15E-16   | 3.42E-14   | 0.09   | 0.12   | 0.02   | 1.07   | SEKIP1        | SEK1-interacting protein 1                                              | chr5  | protein_coding        |                |
| ENSG00000139049.9  | 3.87670736 | 2.04430996 | 1.21E-24   | 4.08E-23   | 0.13   | 0.03   | 1.73   | 1.47   | BAGALNT3      | beta-1.4-N-acetyl-galactosaminyl transferase 3                          | chr12 | protein_coding        |                |
| ENSG00000085563.13 | -3.986132  | -1.175739  | 6.44E-08   | 4.44E-07   | 0.16   | 0.09   | 0      | 0.03   | ABCB1         | ATP-binding cassette, sub-family B (MDR/TAP), member 1                  | chr17 | protein_coding        |                |
| ENSG00000177352.6  | -2.546489  | 2.0628243  | 1.92E-29   | 2.05E-27   | 8.9    | 1.07   | 0.47   | 0.55   | ZNF534C       | zinc finger protein 534C                                                | chr1  | protein_coding        |                |
| ENSG00000108511.9  | 1.27139859 | 4.2793115  | 1.63E-05   | 7.60E-05   | 3.89   | 5.48   | 14.33  | 15.78  | H0XB6         | hemoxibin                                                               | chr17 | protein_coding        |                |
| ENSG00000185187.11 | -5.2381342 | 3.5572572  | 4.12E-44   | 4.00E-42   | 10.23  | 7.34   | 0.36   | 0.26   | SGIRX         | single immunoglobulin-like and twin-interleukin 1 receptor (TIR) domain | chr11 | protein_coding        |                |
| ENSG00000174425.5  | -0.0936975 | 0.021343   | 0.0036781  | 0.000000   | 0.23   | 0.38   | 0.58   | 0.23   | VP53D         | vaccinia protein ICP3 homolog 3 (S. cerevisiae)                         | chr16 | protein_coding        |                |
| ENSG00000261130.4  | -7.479966  | 1.47660733 | 2.30E-38   | 1.60E-36   | 7.22   | 5.66   | 0      | 0      | 0             | RP11-1021N                                                              | ...   | chr16                 | protein_coding |
| ENSG0000025780.11  | 1.2951896  | 2.7011117  | 8.30E-05   | 0.0004087  | 0.28   | 0      | 0      | 1.63   | TM6A3         | transmembrane protein 6A3                                               | chr1  | protein_coding        |                |
| ENSG00000261373.1  | -7.35197   | 3.02040068 | 4.97E-55   | 9.38E-53   | 6.96   | 7.99   | 0.05   | 0.06   | VP59D1-AS1    | VP59D1 antisense RNA 1                                                  | chr16 | antisense             |                |
| ENSG0000027102.1   | 6.11073974 | -2.318297  | 4.74E-05   | 0.0020301  | 0      | 0      | 0.41   | 0.6    | RPS-355.5.5   | ...                                                                     | chr6  | lncRNA                |                |
| ENSG0000018823.15  | 1.842755   | 1.8370451  | 0.000000   | 0.000000   | 0.13   | 0.7    | 0.03   | 0.03   | CEP250        | centrosomal protein 63kDa                                               | chr4  | protein_coding        |                |
| ENSG00000189157.12 | 2.0273339  | -1.538621  | 0.0022775  | 0.00961373 | 0.05   | 0.03   | 0      | 0.17   | FAM4E7        | family with sequence similarity 47, member E                            | chr12 | protein_coding        |                |
| ENSG00000141753.6  | 1.50291452 | 0.90872465 | 1.97E-07   | 1.27E-06   | 108.25 | 100    | 399.55 | 390.27 | KIF84         | human-like growth factor binding domain 4                               | chr17 | protein_coding        |                |
| ENSG0000017327.4   | -1.478982  | 8.9252663  | 3.8E-19    | 8.32E-16   | 460.57 | 28.44  | 0      | 0.18   | PRLED1        | PR1 domain containing 1                                                 | chr9  | protein_coding        |                |
| ENSG00000110756.16 | 2.11784046 | 2.75799298 | 3.28E-11   | 3.46E-10   | 0.26   | 0.24   | 1.65   | 2.34   | HPS1          | Insulin-like growth factor binding domain 4                             | chr11 | protein_coding        |                |
| ENSG0000025959.1   | -2.864188  | -2.509774  | 0.0019023  | 0.0084733  | 0.27   | 0.33   | 0      | 0.09   | CT2-165B2     | ...                                                                     | chr15 | 3prime overlappn ncma |                |
| ENSG00000100625.8  | 1.5336335  | 0.1189871  | 0.0016219  | 0.0003217  | 0.02   | 0.04   | 0.02   | 0.29   | SOX4          | SOX homeobox 4                                                          | chr17 | protein_coding        |                |
| ENSG00000258474.4  | 3.8680795  | -1.216267  | 8.40E-05   | 0.0003415  | 0.02   | 0      | 0.23   | 0.23   | RP11-26718    | ...                                                                     | chr11 | antisense             |                |
| ENSG00000241557.1  | 6.037811   | -2.732777  | 0.000000   | 0.000000   | 0.19   | 0.17   | 0.19   | 0.19   | RP11-759P1    | ...                                                                     | chr11 | antisense             |                |
| ENSG00000189045.13 | 1.23456952 | 0.9505163  | 0.0013849  | 0.00450201 | 0.05   | 0.06   | 0.31   | 0.07   | USH1G         | Usher syndrome 1G (autosomal recessive)                                 | chr17 | protein_coding        |                |
| ENSG00000102531.15 | 1.44412102 | 1.6175607  | 1.45E-05   | 6.85E-05   | 0.16   | 0.18   | 0.63   | 0.61   | INDC3A        | fibronectin type III domain containing 3A                               | chr13 | protein_coding        |                |
| ENSG0000006363.18  | -2.894882  | 0.9531964  | 0.000000   | 0.000000   | 0.17   | 0.17   | 0.17   | 0.17   | CACNA1G       | calcium channel, voltage-dependent, L type, alpha 1G subunit            | chr1  | protein_coding        |                |
| ENSG0000017485.6   | 2.3119631  | -0.138006  | 5.38E-07   | 3.24E-06   | 0.04   | 0.05   | 0.17   | 0.38   | ZBTB33        | zinc finger and BTB domain containing 33                                | chr1  | protein_coding        |                |
| ENSG00000108723.15 | 1.7776942  | 3.21749054 | 5.47E-06   | 2.79E-05   | 0.94   | 1.99   | 6.21   | 3.64   | SPIN1         | spindlin 1                                                              | chr1  | protein_coding        |                |
| ENSG0000011246.15  | 1.6325455  | 1.6598278  | 3.63E-08   | 2.57E-07   | 1.88   | 1.99   | 2.78   | 4.9    | FBCO9         | F-box protein 9                                                         | chr9  | protein_coding        |                |
| ENSG0000017151.1   | 1.57068129 | 2.785879   | 0.000666   | 0.00283128 | 0      | 0.05   | 0.05   | 0.05   | RP11-380B4    | ...                                                                     | chr13 | lncRNA                |                |
| ENSG0000027908.1   | 6.11073974 | -2.318297  | 4.74E-05   | 0.0020301  | 0      | 0      | 0.07   | 0.1    | RP11-481C4    | ...                                                                     | chr17 | TEC                   |                |
| ENSG00000262690.3  | 4.726828   | -0.7185229 | 2.05E-11   | 2.2E-10    | 0.07   | 0.02   | 0.21   | 0.28   | SCARNA15      | small Cajal body-specific RNA 15                                        | chr15 | processed_transcript  |                |
| ENSG0000026086.1   | 2.8829912  | 0.90872465 | 1.97E-07   | 1.27E-06   | 108.25 | 100    | 399.55 | 390.27 | KIF84         | human-like growth factor binding domain 4                               | chr17 | protein_coding        |                |
| ENSG0000016299.5   | -1.3977476 | -0.6368678 | 0.0026113  | 0.0078496  | 0.13   | 0.28   | 0.11   | 0.09   | AAIA324       | KIAA324                                                                 | chr1  | protein_coding        |                |
| ENSG00000224940.7  | 0.940405   | 0.000000   | 0.000000   | 0.000000   | 0.17   | 0.17   | 0.17   | 0.17   | PRRT4         | proline-rich transmembrane protein 4                                    | chr1  | protein_coding        |                |
| ENSG0000016351.13  | 1.04835658 | 0.47963185 | 0.0003719  | 0.0013301  | 3.01   | 2.16   | 7.93   | 6.28   | HADC11        | histone deacetylase 11                                                  | chr1  | protein_coding        |                |
| ENSG00000272741.1  | 2.4906156  | -2.4026582 | 0.0077015  | 0.0197784  | 0.03   | 0      | 0.26   | 0.03   | RP11-536C5    | ...                                                                     | chr1  | antisense             |                |
| ENSG0000015460.11  | 2.091398   | 2.7943108  | 8.30E-05   | 0.0004087  | 0.28   | 0      | 0      | 1.63   | TM6A3         | transmembrane protein 6A3                                               | chr1  | protein_coding        |                |
| ENSG0000018538.4   | 2.49184735 | 0.00288529 | 3.28E-08   | 2.33E-07   | 0.09   | 0.28   | 1.49   | 1.24   | SCC51         | suppressor of cortikine signaling 1                                     | chr16 | protein_coding        |                |
| ENSG00000152684.10 | -1.135567  | 4.6852958  | 4.37E-05   | 0.00018966 | 7.25   | 6.05   | 0.36   | 4.21   | PELO          | pelota homology (Drosophila)                                            | chr1  | protein_coding        |                |
| ENSG0000011236.13  | 5.430815   | 1.8370451  | 0.000000   | 0.000000   | 0.13   | 0.7    | 0.03   | 0.03   | CEP250        | centrosomal protein 63kDa                                               | chr4  | protein_coding        |                |
| ENSG00000089031.8  | -1.8185957 | -0.390206  | 4.48E-05   | 0.00019447 | 0.18   | 0.31   | 0.08   | 0.1    | PTPRH         | protein tyrosine phosphatase, receptor type, H                          | chr19 | protein_coding        |                |
| ENSG0000017740.8   | 1.1363097  | 4.2999937  | 0.0001444  | 0.00049376 | 4.49   | 4.59   | 13.73  | 14.32  | CYB5D2        | cytochrome b5 domain containing 2                                       | chr17 | protein_coding        |                |
| ENSG0000027478.9   | -0.059124  | 0.000000   | 0.000000   | 0.000000   | 0.4    | 0.02   | 0.02   | 0.02   | CHD4R2        | chromatin-related family member 2                                       | chr1  | protein_coding        |                |
| ENSG0000025895.1   | 5.87712165 |            |            |            |        |        |        |        |               |                                                                         |       |                       |                |



ENSG0000070214.1 1.5520842 3.20928024 3.696E-07 2.28E-06 0.28 0.38 0.1 1.59 SL4C4A1 solute carrier family 44 (choline transporter), member 1

ENSG0000019838.6 1.2891812 1.2891812 1.11E-06 1.11E-06 0.0 0.0 0.0 0 CACD11 caspase recruitment domain family, member 11

ENSG0000011816.7 5.48410531 -2.7306244 0.0018808 0.0049521 0 0 0.02 0.01 FRK fyn-related Src family tyrosine kinase

ENSG0000022966.12 1.12041812 5.66712145 0.0001940 0.0003483 2.68 3.27 0.89 8.25 CTN c14orf102 c14orf102 protein/threonine kinase

ENSG0000010533.14 1.8177329 1.8177329 2.05E-09 2.05E-09 0.11 0.11 0.02 3.83 UBE1D1 UBE1 family domain containing 1

ENSG0000014413.11 2.35266725 2.02195406 3.60E-12 4.26E-11 0.1 0.1 0.01 0.96 ZNF462 zinc finger protein 462

ENSG00000106263.18 -1.6703734 9.5023077 9.93E-09 7.54E-08 29.98 286.59 120.82 12393 EF3B8 eukaryotic translation initiation factor 3, subunit B

ENSG0000016557.7 1.1469783 1.1469783 1.03E-09 1.03E-09 0.11 0.11 0.02 0.51 ETRD6B leish repeat and ETR (C2) domain containing

ENSG0000020153.13 1.44232114 0.04310512 0.00016327 0.0002582 0.1 0.06 0.28 0.3 ANR112 aryl hydrocarbon receptor nuclear translocator-like 2

ENSG0000015987.13 2.33458985 -0.112187 2.48E-07 2.10E-06 0.06 0.1 0.53 0.55 LYPO5 LY6PLAUR domain containing 5

ENSG0000018698.10 7.1103499 7.1103499 1.50E-19 1.50E-19 4.8 4.8 0.02 8.92 RASAS3 RAS protein activator 3

ENSG00000132424.13 1.8770365 4.0453612 5.37E-10 4.87E-09 1.02 1.19 3.21 7.72 PMSR PNN-interactor serine/arginine-rich protein

ENSG0000014442.8 1.5524461 1.4529008 8.48E-09 0.04E-08 0.37 0.3 0.91 1.96 ARMC1 armadillo repeat containing 1

ENSG00000261270.1 0.9064771 -1.6468393 0.0046979 0.0137154 0.27 0 0.59 0.82 RP11-325K4 --

ENSG0000028258.1 -5.2109276 -0.3043637 0.00536165 0.0148861 0.07 0.22 0 0 0 RP11-34021 --

ENSG0000011186.11 -2.0419079 3.11728607 1.036E-19 1.036E-19 5.38 4.76 0.86 0.78 WNT59 wntless-type MMTV intron spacer site family, member 5B

ENSG00000170989.8 -4.8907605 0.76810751 5.88E-25 2.02E-23 0.64 1.2 0 0.07 S1PR1 sphingosine-1-phosphate receptor 1

ENSG00000170786.11 -2.9156446 1.80555176 1.28E-16 2.35E-15 1.61 1.43 0.24 0.29 SORL16C5 short chain dehydrogenase/reductase family 16C, member 5

ENSG0000024562.12 1.7583514 1.7587729 0.0684441 0.00185289 0.06 0.03 0.03 0.01 MUTM2D NUT family member 2D

ENSG0000006199.5 1.9773852 2.34815125 9.14E-10 8.04E-09 0.39 0.27 1.46 1.98 SPA17 sperm autoantigenic protein 17

ENSG00000132870.1 1.76990303 1.25704528 4.26E-07 2.61E-06 0.06 0.09 0.33 0.35 KCHH1 ring finger and COOH-type domains 1

ENSG00000163017.12 -1.807773 1.1974073 0.0367167 0.0251905 0.19 0.02 0.01 0.08 ACT152 actin, gamma 2, smooth muscle, enteric

ENSG00000119669.4 -1.2616562 1.06680707 1.26E-05 6.01E-05 37.59 38.08 20.83 20.1 RFBPBL interferon regulatory factor 2 binding protein-like

ENSG00000212537 -2.13794 1.7144793 5.58E-13 7.13E-12 169.41 138.69 45.43 47.99 RSL1 ferritin 1 (mitochondrial outer membrane) homolog (S. cerevisiae)

ENSG0000015852.14 -1.0295315 8.5534378 0.0002287 0.0011891 29.22 30.93 19.68 184.2 PSMO4 proteasome (prosome, macroprosome) 26S subunit, non-ATPase 4

ENSG0000075624.12 -1.6268177 12.8267327 2.23E-08 1.62E-07 4668.73 4601.87 2038.42 1958.86 ACTB actin, beta

ENSG00000154114.11 2.1267493 1.49427271 1.27E-05 1.06E-08 0.16 0.15 0.08 0.4 TRC11 tubulin folding cofactor E-like

ENSG0000012787.11 -1.2136563 6.46635847 2.69E-05 0.00012094 16.98 18.97 11.41 9.17 FRSL1 fibronectin-like 1

ENSG00000250742.1 1.51283126 0.05069248 4.0005756 0.00095903 0.27 0.31 1.06 1.15 RP11-834C1 --

ENSG00000164674.14 1.78274301 1.0272168 6.48E-16 4.47E-08 0.22 0.28 1.26 0.97 SYTL1 synaptotagmin-like 3

ENSG00000189545 1.36921149 3.90041388 4.39E-06 2.28E-05 2.29 2.99 7.66 10.55 KAA1279 --

ENSG00000196417.1 1.30119646 0.98174658 4.03E-14 5.85E-13 401 0.04 0.29 0.32 ZNF765 zinc finger protein 765

ENSG00000103945.7 1.874511 8.45382026 1.64E-10 1.26E-09 163.9 401.87 16.69 146.2 RP11-325K4 --

ENSG00000234546.2 1.5730477 -0.0608001 0.001608 0.00061833 0.62 0.09 1.56 1.33 RP3-510D11 --

ENSG00000174567.7 2.70518459 -1.291469 2.93E-05 0.00013652 0.15 0.09 0.04 0.99 GOLTA1 golgi transport 1A

ENSG0000010361.12 4.5324823 3.09526035 2.25E-12 8.02E-12 6.07 8.06 0.94 0.88 CLIP1 clipin planar cell polarity protein

ENSG0000017567.11 -1.3787861 10.3823684 1.83E-06 1.01E-05 67.45 61.29 336.26 32.18 CLIP1 ring finger and COOH-type domains 1

ENSG00000169429.9 -1.347612 5.5292612 7.42E-12 4.46E-12 0.6 0.6 0.02 0.03 CXCL8 chemokine (C-X-C motif) ligand 8

ENSG00000107951.11 1.32209683 1.39071169 9.96E-05 0.00040127 0.19 0.23 0.69 0.71 MTPAP mitochondrial poly(A) polymerase

ENSG0000020250.7 1.3537187 7.7817548 2.87E-06 1.55E-05 47.49 48.09 167.65 157.53 E2F2 E2F transcription factor 4, p107/p130-binding

ENSG00000120837.6 8.33325 2.403263 6.54E-07 9.95E-08 2.72 2.72 0.01 4.31 MYB2 nuclear transcription factor Y, beta

ENSG00000120686.10 2.0487503 5.64E-12 6.53E-11 0.33 0.32 0.06 1.31 UFM1 ubiquitin-fold modifier 1

ENSG00000171989.1 5.1974851 -2.8969679 0.0003165 0.0148861 0.07 0.22 0 0.02 RPL4-738L20.2 --

ENSG00000178952.7 1.4398467 10.357822 6.54E-07 3.87E-07 764.01 735.06 370.6 366.06 TUFM1 Tu translation elongation factor, mitochondrial

ENSG00000145088.7 2.68467611 -1.8749565 0.0012927 0.00385709 0.05 0.02 0.16 0.47 EAF2 ELL associated factor 2

ENSG00000171203.9 2.8216825 5.04528441 8.31E-10 1.97E-18 1.5 1.36 11.8 13.8 TFAP2A transcription factor AP-2, alpha (activating enhancer binding protein 2, alpha)

ENSG0000027274.11 1.1452763 1.1452763 3.65E-06 0.00010000 0.04 0.04 0.06 0.04 ZBTB88 zinc finger and BTB domain containing 88

ENSG00000109534.15 -1.1639642 6.06679549 2.11E-08 1.54E-07 61.33 68.84 25.39 30.36 GAR1 GAR1 ribonucleoprotein

ENSG0000019122.10 4.5454936 4.5454936 1.74E-12 4.48E-11 11.39 13.29 13.08 11.39 S29 SRC oncogene, non-receptor tyrosine kinase

ENSG00000274191.1 2.2823474 -1.8451984 0.0003791 0.00829022 0 0 1 0.4 RP11-324E6 --

ENSG00000254761.1 -6.5730459 -2.1628269 1.78E-06 9.85E-06 0.51 0.17 0 0 0 RP11-672A2 --

ENSG00000188786.9 3.354125 2.45328729 2.05E-15 9.98E-05 0.05 0.04 0.01 0.01 MTF1 mitogen-activated protein kinase

ENSG00000116871.14 -1.2842727 9.5677708 8.39E-06 4.13E-05 220.53 253.82 136.34 122.49 MAP7D1 MAP7 domain containing 1

ENSG00000140284.9 1.4283335 4.1205032 1.59E-06 8.89E-06 2.31 2.33 1.78 12.11 SLC27A2 solute carrier family 27 (fatty acid transporter), member 2

ENSG0000011483.13 10.23167 1.9341308 1.51E-11 6.57E-10 84.7 93.3 10.4 0.12 SLC35A5 solute carrier family 35, member 5

ENSG0000019761.10 5.06203158 -2.9716376 0.010455 0.02582742 0 0 0 0.05 PPOX peptidic acid oxidase

ENSG0000025822.4 5.04175262 -2.9626714 0.010405 0.02582742 0 0 0 0.03 UBXN1-AT1 UBXN1 transmembrane RNA 1

ENSG0000010351.12 1.8395521 1.8395521 5.87E-07 3.31E-06 17.22 19.07 8.75 9.15 STK12C1 serine/threonine kinase 24

ENSG0000017865.13 1.8396293 -0.6666883 0.00018637 0.00070726 0.05 0.06 0.21 0.31 ZNF713 zinc finger protein 713

ENSG00000170113.16 2.83046489 2.83046489 1.03E-06 1.03E-06 3.12 3.12 0.18 0.66 NUPA1 nucleoporin 1, cytoplasmic repeat domain-Wiik/Angelman syndrome 1

ENSG00000133401.14 1.6270721 1.81220509 8.97E-07 5.20E-06 0.1 0.14 0.46 0.55 PDZD2 peptidyl domain containing 2

ENSG00000174953.12 2.0615644 2.6405251 1.31E-10 1.23E-09 0.26 0.31 1.24 1.95 DHX36 DEAH (Asp-Glu-His) box polypeptide family 3

ENSG0000010790.15 1.1547459 1.1547459 2.66E-17 2.66E-17 182 182 0.01 0.71 ANKRD26 ankyrin repeat domain 26

ENSG00000215474.1 -1.6857206 2.5234284 1.04E-08 7.97E-08 7.05 7.42 3.33 2.65 NUB1L18 neutralized E3 ubiquitin protein ligase 18

ENSG00000261187.1 1.9968488 -2.0252992 0.0139746 0.0347796 0.07 0.02 0.17 0.36 RP11-1007D --

ENSG0000016686.9 1.7082747 1.5205192 0.0001404 0.0003882 0.07 0.07 0.01 0.07 TMPSR1 transmembrane protease, serine 5

ENSG00000109647.1 4.87917439 0.3067869 0.0188873 0.0431957 0 0 0 0.16 RP11-680F8 --

ENSG00000262332 -1.6333767 2.3672726 7.44E-08 5.08E-07 18.89 18.14 7.71 8.22 RP11-157P1 --

ENSG0000017654.12 4.8717525 5.0220014 6.54E-07 3.37E-06 11.81 11.81 0.4 0.36 LPA24 lysophosphatidylcholine acyltransferase 4

ENSG00000162520.16 1.34821297 1.32657209 7.72E-05 0.00031861 0.12 0.14 0.26 0.62 ATP7A ATPase, Cu+ with transporting, alkaline polypeptide

ENSG00000169245.12 2.8197763 3.5988986 7.64E-11 7.77E-10 0.03 0.09 0.23 0.91 ESNALNT1 epsilon-N-ethyl-L-histidine aminyltransferase 1 (glucoside blood group)

ENSG0000016351.2 5.0018692 0.072923 1.29E-12 1.59E-12 0.09 0.04 0.06 0.21 C10orf205 C10orf205

ENSG00000200434.8 -1.6551901 3.9068355 3.36E-08 2.39E-07 8.92 10.75 3.59 4.39 DDO deacplying enoxunibacase

ENSG00000166140.4 2.2952678 2.8327216 1.25E-14 4.47E-13 182 182 0.01 0.71 VASN vasodilator-stimulated phosphatase

ENSG00000171960.9 -1.1100701 6.01040035 0.00021279 0.00048122 70.26 70.24 42.99 49.95 PHH peptidylprolyl isomerase H (cyclophilin H)

ENSG0000013863.7 1.660151 1.8666442 5.08E-07 3.07E-06 4.48 0.57 0.20 3.23 COP5A COP9 signalosome subunit 5

ENSG00000146942.13 3.7891583 3.7891583 1.03E-06 1.03E-06 0.06 0.06 0.01 0.27 SLC12A12 solute carrier family 5 (sodium/magnesium/calcium cotransporter), member 12

ENSG00000112237.11 1.08221748 1.9633905 0.00072199 0.00244975 0.51 0.42 0.84 0.81 CNOC cyclin C

ENSG00000267745.1 -5.018782 -1.3115465 0.0188873 0.0431957 0.15 0 0 0 0 RP11-686D2 --

ENSG00000156510.12 4.770343 0.2869539 3.8E-20 3.81E-19 2.43 2.43 0.03 0.03 HNDK1 hecokinease domain containing 1

ENSG00000239948.1 -1.7111467 -0.0006757 0.00049952 0.00174477 1.83 1.64 0.84 0.57 RP11-410L1 --

ENSG0000015977.1 2.5337985 -2.3736362 0.0077015 0.01977584 0.08 0 0 0.14 0.51 RP11-571M1 --

ENSG00000102933.9 1.8904072 5.8740888 1.98E-06 0.00017407 2.42 2.42 0.31 3.17 EP2002 E1A binding protein p300

ENSG00000128427.1 0.20600302 2.81188903 1.33E-10 1.31E-09 0.28 0.35 1.1 2.17 LGA5L8 lectin, galactose-binding, soluble, 8

ENSG00000108863.13 0.3886874 -0.086113 1.33E-11 5.01E-10 0.19 0.18 0.04 0.18 ZNF538A zinc finger protein 538A

ENSG00000169620.10 1.8498785 -0.192577 0.0021058 0.00391053 0.01 0.04 0.1 0.12 RGF08B RANBP2-like and GRP domain containing 8

ENSG0000012381.7 -1.3248577 5.45572626 5.53E-06 2.72E-05 34.46 38.88 18.27 20.77 TDT1 T-DNA/RNA-lyase deacylase 1

ENSG00000198680.4 1.4587615 4.5360144 1.77E-11 1.18E-10 5.14 5.14 0.02 4.34 TUSC1 tumor suppressor candidate 1

ENSG00000150078.1 2.96218896 4.4714996 5.74E-12 6.64E-11 0.03 0.04 0.26 0.46 TMEM56 transmembrane protein 56

ENSG00000111863.11 2.6504083 -1.901033 0.0012927 0.00385709 0.03 0.01 0.17 0.18 ATDRP androgen-dependent TP1-regulating protein

ENSG00000176244.6 1.4594962 -0.3862927 0.0001404 0.0003882 0.07 0.07 0.01 1.13 ACTC2 actin, cytoplasmic 2

ENSG00000107999.11 1.50924856 4.3985204 3.65E-07 2.26E-06 2.65 3.21 10.85 1.14 VP59D1 VP59 domain containing 1

ENSG00000179388.8 5.2175213 -2.886033 0.0003165 0.0148861 0 0 0 0.04 ORC1 origin recognition complex 1

ENSG0000025758.14 1.5700485 3.7338631 4.29E-07 2.58E-06 2.99 3.39 0.03 1.39 CD3A3 collagen, alpha X (alpha 3)

ENSG00000106031.7 1.3539761 1.10338434 0.0001274 0.00044836 0.17 0.2 0.02 0.8 HMOX1A3 hemoglobin A13

ENSG00000251603.1 1.5894747 -1.5345313 0.025055 0.0003886 0.35 0.37 0.02 0.42 RP11-184P1 --

ENSG0000015107.9 11.010214 2.0073245 4.46E-05 4.79E-43 0 0 0 0.52 0.44 CACNA1C calcium channel, voltage-dependent, L type, alpha 1C subunit

ENSG00000147096.12 2.4896006 -2.402267 0.0077015 0.01977584 0 0 0 0.04 0.01 SLC24A4 solute carrier family 24 (sodium/calcium/calcium exchanger), member 4

ENSG00000157778.7 1.2994352 3.7527294 9.91E-09 6.09E-08 85.4 84.1 33.05 27.79 PSM43 proteasome (prosome, macroprosome) assembly chaperone 3

ENSG00000137216.7 -1.0364371 5.6443951 0.00033596 0.001214 15.42 17.06 10.8 10.18 TMEM38B transmembrane protein 38B

ENSG00000167996.14 -1.0208328 3.7110702 0.00036793 0.00132135 9606.64 8968.24 5711.34 6109.36 FH1 ferritin, heavy polypeptide 1

ENSG000001280196.1 0.0109177 -2.087142 0.010405 0.0047247 0.04 0.04 0.01 0.31 RP11-384M2 --

ENSG00000138590.12 2.4927201 3.8195316 1.38E-15 2.32E-14 0.55 0.68 3.53 5.77 TAOK3 TAO kinase 3

ENSG00000147852.14 1.1959664 3.0243404 7.16E-10 6.36E-09 0.97 1.3 0.29 0.51 VLDLR very low density lipoprotein receptor

ENSG00000136836.11 1.1871881 2.7454433 6.33E-07 3.28E-06 0.12 0.13 0.69 5.88 ACTD3 actin domain containing protein containing 3

ENSG00000167466.12 2.62341577 2.33550003 7.08E-15 1.22E-13 0.51 0.43 3.65 4.06 DNAF3F3 dynein, axonemal, assembly factor 3

ENSG0000024676.5 -4.80699 3.2210194 0.0188873 0.0431957 0.04 0.04 0.06 0.06 ANKRD1 ankyrin repeat domain 6

ENSG0000015828.15 4.6370263 0.76104624 1.49E-12 1.27E-19 0.4 0.46 0.16 0.61 FOXO6 forkhead box O6

ENSG00000204060.5 -2.4088157 2.64200544 1.14E-13 1.57E-12 3.27 3.82 0.17 0 0 PKOX1 protein kinase, cAMP-dependent, type I

ENSG0000018532.13 1.749012 1.1519541 1.70E-11 1.71E-09 0.13 0.02 0.28 0.75 MFJ1 myeloid leukemia factor 1

ENSG0000017835.16 1.8238948 1.17846428 2.58E-07 1.63E-06 0.28 0.28 0.09 0.97 0.78 RFS1 Kruoid-like factor 8

ENSG00000102349.13 7.6335157 1.1272865 5.64E-07 2.89E-30 0.01 0 0.17 0.78 RFS1 Kruoid-like factor 8

ENSG00000166180.10 1.4639952 6.8193467 1.09E-05 2.89E-06 0.13 0.02 0.28 12.73 FOXO6 forkhead box O6

ENSG00000140416.18 -1.9130288 7.44533007 7.77E-11 7.88E-10 26.44 34.47 9.55 12.04 TPM1 tropomyosin 1 (alpha)

ENSG0000013453.18 1.0603656 6.0400023 0.00023217 0.0006787 7.7 8.08 19.88 24.06 EMP1 epithelial membrane protein 1

ENSG00000165015.15 5.45971424 2.0044224 0.00049252 0.00189754 5.23 5.23 0.06 5.86 ADCY2L2 adenylyl cyclase 2, long isoform

ENSG00000183914.13 0.5963867 2.22585404 4.11E-34 2.30E-32 0.01 0.02 0.69 0.5 0.05 DNADH2 dynein, axonemal, heavy chain 2

ENSG0000011405.12 4.1360741 1.7377963 1.37E-24 4.59E-23 0.02 0.05 0.5 1.04 PKCZCA phosphatidylinositol-4-phosphate 3-kinase, catalytic subunit type 2, alpha

ENSG00000124596.15 1.3768529 3.6456412 1.82E-07 1.18E-06 3.4 0.02 0.13 1.94 O-acyl-ADP-ribose deacetylase 1

ENSG00000279608.1 -2.1195631 -2.0806693 0.00048095 0.01167544 0.05 0.03 0 0 0.02 RP11-182N2 --

ENSG00000205208.16 1.1197174 2.88618258 0.00000005 0.00000005 1.85 1.85 0.02 1.19 TAB2 TGF-beta-activated kinase 1/MAP3K7 binding protein 2

ENSG00000187837.3 2.33335038 6.77390317 6.06E-15 9.65E-14 45.78 45.51 315.39 29.17 HST1H1C histone dUT1, H1c

ENSG00000233593.5 3.33546502 1.37024783 9.68E-18 1.95E-16 0.29 0.58 5.92 5.82 RPA-66523.3 --

ENSG00000209219.12 1.9520181 4.2048652 6.52E-12 9.28E-10 2.82 2.82 0.07 1.66 GRM1 glutamate receptor 1

ENSG00000234857.2 -1.078961 8.8279315 0.00017177 0.000656 117.64 132.15 77.41 80.1 HNRNPUL2 HNRNPUL2-BCL2L metalloprotein (NMD candidate)

ENSG0000045248.6 2.0873311 -1.97352 0.0056863 0.0249748 0.03 0.03 0.21 0.15 SLC10A4 solute carrier family 10, member 4

ENSG00000127467.3 3.8169494 3.8169494 5.39E-12 2.8E-29 0.03 0.07 0 0 0 UNO10337 UNO domain containing 10

ENSG00000188217.1 1.2072623 2.42327305 0.00010611 0.00042542 0.3 0.51 1.27 1.21 NCRG1L1 natural killer cell cytotoxicity receptor 3 ligand 1

ENSG00000167635.10 2.04317825 2.888783 9.92E-11 9.94E-10 0.48 0.97 2.51 4.09 ZNF146 zinc finger protein 146

ENSG00000107515.14 2.7854043 2.7854043 6.33E-07 3.28E-06 0.12 0.13 0.69 5.88 ACTD3 actin domain containing protein containing 3

ENSG00000188004.7 2.0306204 2.68559598 1.77E-10 1.70E-09 0.28 0.34 1.33 2.05 OPA1 oitic acid transferase 1

ENSG00000165489.9 1.2023729 1.18276958 1.77E-11 1.28E-10 0.02 0.02 0.19 0.19 TMEM45C transmembrane protein 45C

ENSG0000010000.16 1.9107319 8.0111124 3.54E-06 1.87E-05 60.18 50.39 30.42 27.42 TSP1

[illegible]

|       |                |
|-------|----------------|
| chr15 | protein_coding |
| chr16 | protein_coding |
| chr19 | protein_coding |
| chr22 | protein_coding |
| chr9  | protein_coding |
| chr11 | protein_coding |
| chrM  | Mt_rRNA        |
| chr6  | protein_coding |
| chr15 | protein_coding |
| chr19 | protein_coding |
| chr8  | protein_coding |
| chr6  | protein_coding |
| chr17 | protein_coding |
| chr19 | lincRNA        |
| chr16 | protein_coding |
| chr9  | protein_coding |
| chr12 | protein_coding |
| chr6  | protein_coding |
| chr1  | protein_coding |
| chr6  | protein_coding |
| chr2  | protein_coding |
| chr12 | protein_coding |
| chr4  | protein_coding |
| chr2  | protein_coding |
| chr15 | lincRNA        |
| chr1  | lincRNA        |
| chr1  | antisense      |
| chr13 | protein_coding |
| chr14 | protein_coding |
| chr4  | protein_coding |
| chr3  | protein_coding |
| chr1  | protein_coding |
| chr17 | protein_coding |
| chr20 | snoRNA         |
| chr12 | protein_coding |
| chr8  | protein_coding |
| chr3  | protein_coding |
| chr9  | antisense      |
| chr16 | protein_coding |
| chr14 | protein_coding |
| chr3  | protein_coding |
| chr2  | protein_coding |
| chr21 | protein_coding |
| chr16 | protein_coding |
| chr17 | protein_coding |
| chr3  | TEC            |
| chr10 | protein_coding |
| chr13 | protein_coding |
| chr15 | antisense      |
| chr17 | protein_coding |
| chr1  | antisense      |
| chr6  | protein_coding |
| chr19 | protein_coding |
| chr19 | lincRNA        |
| chr5  | protein_coding |
| chr17 | protein_coding |
| chr2  | protein_coding |
| chr6  | protein_coding |
| chr14 | protein_coding |
| chr22 | protein_coding |
| chr14 | sense_intronic |
| chr1  | protein_coding |
| chr7  | protein_coding |
| chr8  | protein_coding |
| chr15 | lincRNA        |
| chr9  | protein_coding |
| chr10 | lincRNA        |
| chr1  | protein_coding |
| chr1  | protein_coding |
| chr19 | protein_coding |
| chr5  | protein_coding |
| chr19 | protein_coding |
| chr3  | protein_coding |
| chr1  | sense_intronic |
| chr16 | protein_coding |
| chr16 | protein_coding |
| chr6  | protein_coding |
| chr1  | protein_coding |
| chr6  | protein_coding |
| chr7  | protein_coding |
| chr2  | protein_coding |
| chr6  | lincRNA        |
| chr14 | protein_coding |
| chr11 | protein_coding |
| chr15 | protein_coding |
| chr2  | protein_coding |
| chr6  | lincRNA        |
| chr11 | protein_coding |
| chr5  | protein_coding |
| chr5  | protein_coding |
| chr17 | antisense      |
| chr3  | protein_coding |
| chr10 | protein_coding |
| chr19 | protein_coding |
| chr7  | protein_coding |
| chr11 | protein_coding |
| chr15 | protein_coding |
| chr20 | protein_coding |
| chr8  | protein_coding |
| chr14 | protein_coding |
| chr3  | protein_coding |
| chrX  | protein_coding |
| chr21 | protein_coding |
| chr4  | protein_coding |
| chr3  | lincRNA        |
| chr19 | protein_coding |
| chrX  | protein_coding |
| chr18 | protein_coding |
| chr1  | protein_coding |
| chr8  | protein_coding |
| chr6  | protein_coding |
| chr6  | protein_coding |
| chr3  | protein_coding |
| chr13 | protein_coding |
| chr2  | protein_coding |
| chr18 | antisense      |
| chr8  | protein_coding |
| chr6  | protein_coding |
| chr20 | protein_coding |
| chr19 | protein_coding |
| chr10 | protein_coding |
| chr15 | lincRNA        |
| chr11 | protein_coding |
| chr1  | protein_coding |
| chrX  | protein_coding |
| chr19 | protein_coding |
| chr15 | protein_coding |
| chr5  | protein_coding |
| chr7  | protein_coding |
| chr3  | protein_coding |
| chr8  | protein_coding |
| chr17 | protein_coding |
| chr2  | protein_coding |
| chr1  | protein_coding |
| chr2  | protein_coding |
| chr1  | sense_intronic |
| chr20 | lincRNA        |
| chr3  | protein_coding |
| chr1  | protein_coding |
| chr3  | protein_coding |
| chr18 | antisense      |
| chr11 | protein_coding |
| chr8  | misc RNA       |
| chrM  | protein_coding |
| chr14 | protein_coding |
| chr7  | sense_intronic |
| chr14 | protein_coding |
| chr1  | protein_coding |
| chr1  | protein_coding |
| chr10 | protein_coding |
| chr12 | protein_coding |
| chr5  | protein_coding |
| chrX  | protein_coding |
| chr3  | antisense      |
| chr3  | antisense      |
| chr3  | protein_coding |
| chr14 | protein_coding |
| chr19 | lincRNA        |
| chr15 | lincRNA        |
| chr16 | protein_coding |
| chr6  | protein_coding |
| chr1  | lincRNA        |
| chr8  | protein_coding |
| chr1  | protein_coding |
| chr6  | protein_coding |
| chr21 | protein_coding |
| chr20 | lincRNA        |
| chr19 | protein_coding |

|                    |            |            |            |            |        |        |         |         |             |                                                                                               |       |                |
|--------------------|------------|------------|------------|------------|--------|--------|---------|---------|-------------|-----------------------------------------------------------------------------------------------|-------|----------------|
| ENSG00000210756.11 | 4.31394882 | -0.2449548 | 1.22E-13   | 1.68E-12   | 0.01   | 0.02   | 0.29    | 0.44    | PLS1        | plastin 1                                                                                     | chr3  | protein_coding |
| ENSG00000168931.14 | 7.13711947 | -1.7204166 | 1.74E-18   | 5.61E-08   | 0.07   | 0.07   | 0.42    | 0.4     | AR          | arrestin receptor                                                                             | chr3  | protein_coding |
| ENSG00000261789.1  | 3.09310043 | -2.6178507 | 0.0043894  | 0.02469931 | 0.02   | 0      | 0       | 0.21    | RP11-709D2  | --                                                                                            | chr16 | antisense      |
| ENSG00000074016.16 | 1.20497689 | 2.50144837 | 0.00010952 | 0.00034673 | 0.55   | 0.63   | 1.23    | 2.4     | DNM1L       | dynamitin 1-like                                                                              | chr12 | protein_coding |
| ENSG00000145415.15 | 1.69674474 | -0.8903269 | 0.00000000 | 0.00000000 | 0.40   | 0.10   | 2528.76 | 2956.61 | RP11-133A   | ribosomal protein L13a                                                                        | chr19 | protein_coding |
| ENSG00000176811.11 | -1.2219005 | 0.6969637  | 2.43E-05   | 0.00010979 | 78.82  | 88.72  | 39.28   | 56.68   | TOMM5       | translocase of outer mitochondrial membrane 5 homolog (yeast)                                 | chr9  | protein_coding |
| ENSG00000163395.15 | -9.4019307 | 0.3586235  | 1.75E-26   | 6.66E-25   | 0.08   | 0.27   | 0       | 0       | IGFN1       | immunoglobulin-like and fibronectin type III domain containing 1                              | chr11 | protein_coding |
| ENSG00000185057.18 | 1.78713173 | -0.1165767 | 3.43E-05   | 0.00015114 | 0.08   | 0.07   | 0.2     | 0.47    | CCN1        | cellular communication network factor 1                                                       | chr10 | protein_coding |
| ENSG00000107443.14 | 1.78713173 | -0.1165767 | 3.43E-05   | 0.00015114 | 0.08   | 0.07   | 0.2     | 0.47    | CCN1        | cyclin 1                                                                                      | chr10 | protein_coding |
| ENSG00000144728.13 | -0.4451879 | -1.6099575 | 4.63E-07   | 2.61E-06   | 0.03   | 0.14   | 0.01    | 0       | GALNT13     | polypeptide N-acetylgalactosaminyltransferase 13                                              | chr10 | protein_coding |
| ENSG00000156201.8  | 1.8444646  | 0.7827319  | 0.00000000 | 0.00000000 | 0.55   | 0.59   | 2.42    | 3.54    | ABHD3       | aldehyde dehydrogenase domain containing 3                                                    | chr11 | protein_coding |
| ENSG00000205659.9  | 1.2917214  | 2.8237549  | 2.64E-05   | 0.00011887 | 1.06   | 1.32   | 4.04    | 3.67    | UNSL2       | lin-52 DREAM MuvB core complex component                                                      | chr14 | protein_coding |
| ENSG00000110992.3  | -0.511143  | 6.75595242 | 5.08E-07   | 1.75E-03   | 35.97  | 42.51  | 0.65    | 0.14    | CCND1       | cyclin D1                                                                                     | chr12 | protein_coding |
| ENSG00000196632.9  | 8.72647188 | -0.1475639 | 8.15E-19   | 1.79E-17   | 0      | 0      | 0.1     | 0.2     | WNK3        | WNK lysine deficient protein kinase 3                                                         | chr15 | protein_coding |
| ENSG00000104129.8  | -1.2563116 | 5.59621616 | 1.47E-05   | 6.96E-05   | 16.83  | 20.55  | 11.27   | 9.48    | DNAIC17     | DnaI (Hsp40) homolog, subfamily C, member 17                                                  | chr15 | protein_coding |
| ENSG00000244578.11 | 1.66674474 | -0.8903269 | 0.00000000 | 0.00000000 | 0.07   | 0.03   | 0.11    | 0.32    | UNC119B1    | long interspersed non-protein coding RNA 1391                                                 | chr15 | lincRNA        |
| ENSG00000174531.16 | -1.0817226 | 5.34045639 | 0.00018936 | 0.00071756 | 27.25  | 25.36  | 15.92   | 17.24   | POLR1C      | polymerase (RNA) I polypeptide C, 30kDa                                                       | chr1  | protein_coding |
| ENSG00000197106.6  | 3.0728205  | 3.6344885  | 2.62E-21   | 7.02E-20   | 0.24   | 0.24   | 3.94    | 3.43    | SLC6A17     | solute carrier family 6 (neural amino acid transporter), member 17                            | chr1  | protein_coding |
| ENSG00000276353.5  | 2.31964219 | -1.1521486 | 4.32E-07   | 2.94E-06   | 0.07   | 0.05   | 0.08    | 0.42    | CTC-206E66  | --                                                                                            | chr19 | antisense      |
| ENSG00000131395.10 | 1.0259303  | 2.9304444  | 0.00070966 | 0.00021098 | 1.54   | 1.07   | 3.33    | 3.77    | SLC39A11    | solute carrier family 39, member 11                                                           | chr17 | protein_coding |
| ENSG00000128165.8  | -2.2460312 | 4.2872228  | 1.79E-13   | 2.43E-12   | 5.9    | 6.42   | 1.92    | 1.15    | ADMT2       | adenomucin-2                                                                                  | chr22 | protein_coding |
| ENSG00000186211.8  | 1.52539376 | 6.7169601  | 1.59E-07   | 1.04E-06   | 20.77  | 17.05  | 69.74   | 75.81   | TUBB3       | tubulin, beta 3 class III                                                                     | chr16 | protein_coding |
| ENSG00000274671.1  | -5.3778332 | -2.9451057 | 0.00290522 | 0.00056312 | 0.04   | 0.37   | 0       | 0       | RP11-505K9  | --                                                                                            | chr16 | antisense      |
| ENSG00000195720.10 | 1.88074633 | 7.0229933  | 1.36E-11   | 1.34E-09   | 27.21  | 24.4   | 114.0   | 120.25  | PRKVD01     | ATPase, H+ translocating, 38kDa: V0 subunit d1                                                | chr16 | protein_coding |
| ENSG00000000891.4  | 3.31798901 | 1.89164313 | 2.18E-19   | 4.99E-19   | 0.05   | 0.09   | 0.74    | 1.02    | CT7         | zinc finger protein, X-linked                                                                 | chr16 | protein_coding |
| ENSG00000056060.15 | 1.12920599 | 3.76175457 | 0.00014408 | 0.00055146 | 0.74   | 0.65   | 1.8     | 2.26    | UHRF1BP1    | UHRF1 binding protein 1                                                                       | chr14 | protein_coding |
| ENSG00000270308.11 | -5.3724655 | -2.924208  | 0.00290522 | 0.00056312 | 0.26   | 0.08   | 0       | 0       | RP11-1071N  | --                                                                                            | chr14 | lincRNA        |
| ENSG00000197563.8  | 1.2465895  | 2.80388813 | 5.47E-05   | 0.00021634 | 0.55   | 0.65   | 1.5     | 2.31    | PIGN        | cholesterylidyltransferase 1 (cholesterol biosynthesis, class N)                              | chr18 | protein_coding |
| ENSG00000178015.4  | 1.6651007  | 0.1613428  | 4.17E-05   | 0.00018165 | 0.14   | 0.25   | 0.87    | 0.78    | GRP150      | G protein-coupled receptor 150                                                                | chr5  | protein_coding |
| ENSG00000136531.1  | 4.37769882 | -1.5844702 | 1.73E-07   | 1.02E-06   | 0.06   | 0      | 0       | 1.02    | RP11-178C3  | --                                                                                            | chr17 | protein_coding |
| ENSG00000137938.9  | -1.7766837 | -1.6845418 | 4.48E-09   | 3.59E-08   | 0.06   | 0.06   | 0       | 0       | PRDM5       | PR domain containing 5                                                                        | chr5  | protein_coding |
| ENSG00000163238.11 | 0.6043808  | -0.3474003 | 1.15E-15   | 1.94E-14   | 0.01   | 0      | 0.57    | 0.59    | TDRD10      | tudor domain containing 10                                                                    | chr1  | protein_coding |
| ENSG00000118922.14 | 1.9424299  | 5.9374026  | 0.00039429 | 0.00110537 | 8.17   | 8.01   | 3.42    | 5.12    | PRND1A      | DENRMAAD domain containing 1A                                                                 | chr1  | protein_coding |
| ENSG00000132970.11 | 0.2869985  | 0.6741603  | 2.91E-25   | 1.03E-23   | 0.01   | 0      | 0.06    | 0.7     | WASF3       | WASF family member, 3                                                                         | chr13 | protein_coding |
| ENSG00000121274.11 | 1.14798717 | 1.0769538  | 1.14E-07   | 6.50E-06   | 0.08   | 0.05   | 0.76    | 0.76    | PAPDS       | PAT associated domain containing 5                                                            | chr16 | protein_coding |
| ENSG00000104541.13 | 3.1917612  | 0.0259786  | 0.00012625 | 0.00050965 | 0.06   | 0.09   | 0.21    | 0.29    | DTWD1       | DTW domain containing 1, non-receptor tyrosine kinase                                         | chr15 | protein_coding |
| ENSG00000120814.4  | -5.098757  | 5.1807819  | 4.10E-48   | 5.14E-46   | 25.38  | 23.17  | 0.99    | 0.89    | LXK1L       | lyxin oxidase-like 1                                                                          | chr15 | protein_coding |
| ENSG00000130181.13 | 1.0247122  | 4.9445044  | 1.70E-12   | 1.74E-11   | 0.41   | 0.31   | 1.41    | 1.5     | CHD3        | CH domain containing 3                                                                        | chr1  | protein_coding |
| ENSG00000106636.8  | -4.6264859 | 7.6431356  | 1.51E-44   | 1.51E-42   | 101.63 | 93.35  | 4.78    | 5.76    | SERPINE1    | serpin peptidase inhibitor, clade E (nexin), plasminogen activator inhibitor type 1, member 1 | chr19 | protein_coding |
| ENSG00000104129.8  | 2.7436444  | 3.80423578 | 4.68E-18   | 9.66E-17   | 3.9    | 5.78   | 48.13   | 37.89   | CNFR        | conformational change factor                                                                  | chr19 | protein_coding |
| ENSG00000161396.11 | 1.05214039 | 8.1043832  | 0.00000000 | 0.00000000 | 0.45   | 0.45   | 0.92    | 4.15    | KACAB1      | case GRI attachment to proteins 3                                                             | chr17 | protein_coding |
| ENSG00000157107.12 | 1.84911396 | -0.1891986 | 3.53E-05   | 0.00015536 | 0.04   | 0.07   | 0.4     | 0.46    | FCOXC2      | FCM domain only 2                                                                             | chr17 | protein_coding |
| ENSG00000179078.11 | 1.20458075 | -1.4865887 | 1.76E-09   | 1.50E-08   | 0.7    | 0      | 0.32    | 0.16    | SNDR1-IT1   | SNDR1 intronic transcript 1                                                                   | chr17 | lincRNA        |
| ENSG00000161408.9  | 0.86911719 | 0.00000000 | 0.00000000 | 0.00000000 | 0.09   | 0.23   | 0       | 0.37    | PRKAC2      | protein kinase, AMP-activated, alpha 2 catalytic subunit                                      | chr17 | protein_coding |
| ENSG00000164574.14 | -1.6380231 | 5.9948612  | 2.20E-08   | 1.60E-07   | 7.97   | 9.19   | 3.54    | 3.81    | GALNT10     | polypeptide N-acetylgalactosaminyltransferase 10                                              | chr12 | protein_coding |
| ENSG00000108619.11 | 3.55949786 | -2.2348717 | 0.0006294  | 0.00226478 | 0.01   | 0      | 0.03    | 0.13    | AQP6        | aquaporin 6, kidney specific                                                                  | chr12 | protein_coding |
| ENSG00000197077.16 | 1.52116019 | 0.9259788  | 6.50E-08   | 4.48E-07   | 63.4   | 59.2   | 2.92    | 25.53   | ABL1        | ABL proto-oncogene 1, non-receptor tyrosine kinase                                            | chr1  | protein_coding |
| ENSG00000232231.1  | 1.44558113 | 0.33321996 | 0.00020676 | 0.00079926 | 0.22   | 0.34   | 0.94    | 1.09    | RP11-573D1  | --                                                                                            | chr1  | lincRNA        |
| ENSG00000179501.14 | -0.5328082 | 2.9831753  | 0.00000000 | 0.00000000 | 0.45   | 0.45   | 0.92    | 1.32    | ACPOC2      | acetylcholinesterase B mRNA editing enzyme, catalytic polypeptide-like 38                     | chr22 | protein_coding |
| ENSG00000130495.5  | 1.1792486  | 1.95367475 | 0.00024014 | 0.00091931 | 0.29   | 0.4    | 0.75    | 1.32    | ZWIM6       | zinc finger, SWIM-type domain 6                                                               | chr1  | protein_coding |
| ENSG00000183723.11 | 1.15445995 | 4.33787685 | 9.11E-07   | 5.28E-06   | 2.3    | 2.28   | 7.64    | 6.16    | CMTM4       | KUHL-like MARVEL transmembrane domain containing 4                                            | chr16 | protein_coding |
| ENSG00000166145.13 | 6.3102415  | 4.9140536  | 2.32E-01   | 1.74E-01   | 0.66   | 0.68   | 2.14    | 38.7    | SPN11       | serine peptidase inhibitor, Kunitz type 1                                                     | chr1  | protein_coding |
| ENSG00000263506.6  | -1.6709882 | 3.8259013  | 2.77E-08   | 2.00E-07   | 4.64   | 5.08   | 2.98    | 2.07    | KKIK        | inhibitor of kappa light polypeptide gene enhancer in B-cells, kinase epsilon                 | chr1  | protein_coding |
| ENSG00000274370.1  | -5.633126  | -2.7855467 | 0.0006964  | 0.00289128 | 0.48   | 0      | 0       | 0       | AC14831.3   | --                                                                                            | chr17 | lincRNA        |
| ENSG00000162428.2  | 1.511381   | 4.184367   | 0.00000000 | 0.00000000 | 0.37   | 0.37   | 0.85    | 3.87    | SCX         | scavenger basic helix-loop-helix transcription factor                                         | chr18 | protein_coding |
| ENSG00000120820.11 | 1.02057941 | 2.5104013  | 0.0010061  | 0.00330431 | 1.14   | 1.08   | 2.31    | 3.74    | GLTB02      | glycosyltransferase 2                                                                         | chr12 | protein_coding |
| ENSG00000119782.12 | -1.610712  | -0.5532145 | 0.0004671  | 0.00126553 | 0.97   | 0.47   | 0.33    | 0.3     | KPFBP1      | KPFB binding protein 18, 12.6 kDa                                                             | chr1  | protein_coding |
| ENSG00000184616.11 | 1.1829581  | 0.3388984  | 0.00010811 | 0.00034522 | 1.39   | 1.73   | 0.98    | 1.73    | ZNF897      | zinc finger protein 587                                                                       | chr19 | protein_coding |
| ENSG00000248405.8  | 4.30853741 | 0.6412632  | 4.86E-19   | 1.09E-17   | 0.01   | 0.08   | 1.27    | 0.99    | PRRS-ARHGAP | PRRS-ARHGAP readthrough                                                                       | chr22 | protein_coding |
| ENSG00000164940.15 | 1.2713869  | 0.00000000 | 0.00000000 | 0.00000000 | 0.76   | 0.76   | 0.09    | 1.64    | PRKAC2      | protein kinase, AMP-activated, alpha 2 catalytic subunit                                      | chr17 | protein_coding |
| ENSG00000138643.13 | 2.31138621 | 1.1902783  | 2.93E-10   | 2.75E-09   | 0.2    | 0.1    | 0.89    | 1.12    | HERC6       | HECT and RLD domain containing E3 ubiquitin protein ligase family member 6                    | chr1  | protein_coding |
| ENSG00000208217.15 | -1.738375  | 2.85595761 | 2.05E-08   | 1.50E-07   | 2.5    | 2.37   | 1.06    | 0.88    | NFRSF18     | tumor necrosis factor receptor superfamily, member 18                                         | chr1  | protein_coding |
| ENSG00000142211.12 | -1.7252774 | 1.5745894  | 0.00000000 | 0.00000000 | 0.09   | 0.09   | 0.4     | 0.04    | PRPF38A     | pre-mRNA processing factor 38A                                                                | chr4  | protein_coding |
| ENSG00000122547.9  | -1.4314799 | 2.4035394  | 4.63E-06   | 2.40E-05   | 1.21   | 1.41   | 0.63    | 0.67    | EPD1        | endonuclease/exonuclease/phosphatase family domain containing 1                               | chr7  | protein_coding |
| ENSG00000178567.7  | 3.9854402  | 1.5923149  | 8.82E-23   | 2.59E-21   | 0.04   | 0.03   | 0.42    | 0.14    | EMDZAP1     | EMDZA (aforsin) interacting protein 1                                                         | chr1  | protein_coding |
| ENSG00000208101.11 | 1.54854929 | 0.3074468  | 0.00015685 | 0.00030382 | 0.53   | 0.53   | 0.92    | 1.24    | RP11-546D6  | --                                                                                            | chr12 | TEC            |
| ENSG00000116321.14 | 1.1819017  | 0.6821269  | 4.26E-05   | 0.00018903 | 9.68   | 13.11  | 28.01   | 41.13   | E4F4E2      | erythroid transcription initiation factor 4 gamma, 2                                          | chr11 | protein_coding |
| ENSG00000197622.14 | 1.30410221 | 1.66474423 | 7.61E-05   | 0.00014036 | 0.31   | 0.52   | 0.97    | 1.74    | SNCS        | sorking nuclear protein                                                                       | chr14 | protein_coding |
| ENSG00000184515.9  | 6.3102415  | 2.1686721  | 8.95E-08   | 4.38E-05   | 0.4    | 0.66   | 1.26    | 0.38    | REX5        | brain expressed X-linked 5                                                                    | chr11 | protein_coding |
| ENSG00000198772.2  | 1.4830553  | 1.0047514  | 3.10E-07   | 1.93E-06   | 290.15 | 503.53 | 1621.61 | 1317.96 | MT-CYB      | mitochondrially encoded cytochrome b                                                          | chr10 | protein_coding |
| ENSG00000204147.8  | 1.9106115  | -0.766969  | 0.00013355 | 0.00052381 | 0.01   | 0.09   | 0.24    | 0.25    | AC2B        | N-acylglucosamine amidohydrolase (non-lysosomal ceramidase) 2B                                | chr10 | protein_coding |
| ENSG00000175279.20 | 1.58297911 | 1.7878941  | 0.0168621  | 0.04052361 | 2.3    | 2.71   | 5.22    | 0.43    | APTD1L      | apoptosis-inducing, TAP3-like domain 1                                                        | chr1  | protein_coding |
| ENSG00000171155.7  | 1.20736381 | 3.1686908  | 6.77E-05   | 0.00028025 | 2.17   | 2.71   | 5.22    | 0.9     | CIGAL1C1    | CIGAL1-specific chaperone 1                                                                   | chr1  | protein_coding |
| ENSG00000232771.1  | -6.7975844 | -1.8133737 | 1.32E-07   | 1.07E-07   | 0.2    | 0      | 0       | 0       | AF127578    | --                                                                                            | chr1  | antisense      |
| ENSG00000134152.9  | 1.44967607 | -0.355843  | 0.00138295 | 0.00443091 | 0.13   | 0.09   | 0.99    | 0.71    | KATNB1L     | katanin p80 subunit B-like 1                                                                  | chr15 | protein_coding |
| ENSG00000134298.8  | -5.7564407 | 0.3005988  | 5.37E-23   | 1.61E-21   | 1.13   | 1.77   | 0.02    | 0.04    | POPCD3      | poupeye domain containing 3                                                                   | chr1  | protein_coding |
| ENSG00000127880.5  | 1.05214039 | 8.1043832  | 0.00000000 | 0.00000000 | 0.45   | 0.45   | 0.92    | 4.15    | KACAB1      | case GRI attachment to proteins 3                                                             | chr17 | protein_coding |
| ENSG00000209042.1  | 3.41854287 | -2.4190721 | 0.00112121 | 0.00364442 | 0.3    | 0      | 2.88    | 2.45    | SNORD12C    | small nucleolar RNA, C/D box 12C                                                              | chr20 | snoRNA         |
| ENSG00000111101.10 | 3.55243626 | 3.91551696 | 6.45E-27   | 2.54E-25   | 0.29   | 0.31   | 4.32    | 0.57    | PMH1H       | protein phosphatase, Mg2+/Mn2+-dependent, 1H                                                  |       |                |

|                    |             |            |            |            |        |        |        |                |                                                                                                                  |       |                |
|--------------------|-------------|------------|------------|------------|--------|--------|--------|----------------|------------------------------------------------------------------------------------------------------------------|-------|----------------|
| ENSG00000149179.12 | 1804587     | 4.96048401 | 1.10E-09   | 9.52E-09   | 17.87  | 0.64   | 6.88   | C11orf49       | chromosome 11 open reading frame 49                                                                              | chr11 | protein_coding |
| ENSG0000017086.7   | 12650204    | 0.00000000 | 0.00000000 | 0.00000000 | 0.00   | 0.00   | 0.03   | SCN4B          | sodium channel, voltage gated, type IV, beta subunit                                                             | chr11 | protein_coding |
| ENSG00000143434.14 | 112669922   | 0.1736026  | 0.0074897  | 0.02009224 | 0.26   | 0.12   | 0.63   | 047 SEMA6C     | sema domain, transmembrane domain (TM), and cytoplasmic domain, (semaphorin) 6C                                  | chr11 | protein_coding |
| ENSG00000103319.10 | 13309483    | 5.6423494  | 4.75E-06   | 2.45E-05   | 7.62   | 8.05   | 417    | EF2K2          | eukaryotic elongation factor 2 kinase                                                                            | chr16 | protein_coding |
| ENSG0000017783.5   | 43309568    | 4.3783541  | 8.85E-17   | 7.63E-06   | 0.48   | 0.00   | 0.59   | ETDR           | ectodermal dysplasia receptor 8                                                                                  | chr16 | protein_coding |
| ENSG00000279122.1  | 656572038   | 1.9847127  | 1.05E-06   | 6.02E-06   | 0      | 0      | 0.31   | 03 RP11-394B2  | --                                                                                                               | chr16 | TEC            |
| ENSG00000260011.2  | 54694885    | 2.7387023  | 0.0013008  | 0.00495621 | 0      | 0      | 0.53   | 045 RP13-2014  | --                                                                                                               | chr17 | lncRNA         |
| ENSG000001019.14   | 46525141    | 3.2429535  | 1.39E-06   | 7.63E-06   | 0.57   | 0.00   | 0.00   | 214 DCMBD2     | disconsin, CUB and LCC1 domain containing 2                                                                      | chr17 | protein_coding |
| ENSG00000278112.1  | 193235425   | 0.2131509  | 1.72E-05   | 8.02E-05   | 0.86   | 0.24   | 0.37   | 198 RP11-972P1 | --                                                                                                               | chr17 | sense_intronic |
| ENSG00000196151.9  | 116820694   | 0.31501803 | 0.0025175  | 0.0058532  | 0.23   | 0.32   | 0.56   | 107 WD50B1     | WD repeat, sterile alpha motif and U-box domain containing 1                                                     | chr17 | protein_coding |
| ENSG0000017944.1   | 333853663   | 2.4705837  | 0.0073663  | 0.00584723 | 0.17   | 0.00   | 0.00   | 091 RP11-27A41 | --                                                                                                               | chr16 | TEC            |
| ENSG00000254268.1  | 325115021   | 2.18001492 | 9.97E-20   | 2.34E-18   | 0.39   | 0.93   | 0.83   | 819 RP11-398H6 | --                                                                                                               | chr18 | lncRNA         |
| ENSG0000014967.6   | 43593138    | 2.406293   | 0.0011611  | 0.00364442 | 0.00   | 0.00   | 0.05   | 001 NCV4A2     | neuro-oncological ventral antigen 2                                                                              | chr19 | protein_coding |
| ENSG00000101012.12 | 765250091   | 1.97725187 | 5.03E-42   | 4.23E-40   | 0.03   | 0      | 4.68   | 398 CD40       | CD40 molecule, TNF receptor superfamily member 5                                                                 | chr20 | protein_coding |
| ENSG00000101012.12 | 2.0461034   | 1.3810257  | 1.97E-11   | 2.14E-10   | 4.16   | 3.96   | 1.4    | 122 FAM131A    | family with sequence similarity 131, member A                                                                    | chr20 | protein_coding |
| ENSG0000026036.1   | 13395459    | 2.7702297  | 0.0043889  | 0.0046901  | 0.47   | 0      | 0.05   | RP11-452E15    | --                                                                                                               | chr19 | antisense      |
| ENSG0000025867.1   | 362073853   | 1.6221396  | 1.25E-05   | 5.96E-05   | 0      | 0.04   | 0.34   | 042 DENND5B-A  | DENND5B antisense RNA 1                                                                                          | chr12 | antisense      |
| ENSG0000018917.15  | 296649567   | 0.3569188  | 8.36E-09   | 6.48E-08   | 0.01   | 0.04   | 0.16   | 035 CMT2C      | cmt methyltransferase 2                                                                                          | chr16 | protein_coding |
| ENSG00000105260.10 | 126986365   | 6.0001092  | 1.22E-05   | 5.81E-05   | 10.21  | 9.59   | 32.64  | 3032 ARF1      | arfohead box C1                                                                                                  | chr19 | protein_coding |
| ENSG00000260837.1  | 417213804   | 3.1445547  | 0.0188973  | 0.00419557 | 0      | 0      | 0.1    | 004 RP11-434B1 | --                                                                                                               | chr2  | lncRNA         |
| ENSG0000022725.5   | -5.210976   | -0.304387  | 0.0053165  | 0.0148851  | 0.04   | 0.13   | 0      | 0 ACJ08795     | --                                                                                                               | chr2  | antisense      |
| ENSG00000179958.7  | 410511882   | 5.0774571  | 0.0029043  | 0.00102963 | 29.52  | 21.4   | 15.6   | 1685 DTPP1     | dCTP pyrophosphatase 1                                                                                           | chr16 | protein_coding |
| ENSG00000198781.1  | 13566699    | 1.9770073  | 1.25E-24   | 4.20E-23   | 182.37 | 193.28 | 28.72  | 2621 LAMB3     | lambin, beta 3                                                                                                   | chr1  | protein_coding |
| ENSG0000016538.15  | 15479168    | 1.2896474  | 0.0110768  | 0.0286937  | 0.02   | 0.08   | 0.08   | 008 HECTD2     | HECT domain containing E3 ubiquitin protein ligase 2                                                             | chr20 | protein_coding |
| ENSG0000054598.6   | 132417822   | 4.0272083  | 4.18E-05   | 0.0018169  | 3.95   | 5.44   | 2.96   | 253 FOW1       | forhead box C1                                                                                                   | chr17 | protein_coding |
| ENSG00000261324.2  | 471103305   | 0.1046705  | 5.00E-17   | 9.48E-16   | 0.01   | 0.01   | 0.32   | 042 RP11-174G6 | --                                                                                                               | chr12 | sense_intronic |
| ENSG0000017668.15  | 63787808    | 2.9678907  | 8.54E-46   | 9.27E-44   | 0.00   | 0.01   | 2.26   | 198 MYO1D      | myosin ID                                                                                                        | chr17 | protein_coding |
| ENSG0000011452.11  | -91300322   | 2.28521803 | 5.91E-31   | 7.32E-49   | 1.4    | 1.45   | 0.01   | 0 GPR133       | --                                                                                                               | chr12 | protein_coding |
| ENSG00000179242.14 | -5.589964   | -1.137072  | 1.76E-12   | 2.16E-11   | 0.11   | 0.08   | 0      | 0 CDH4         | cadherin 4, type 1, R-cadherin (retinal)                                                                         | chr20 | protein_coding |
| ENSG0000017276.17  | 303224159   | 0.6835922  | 3.74E-13   | 4.88E-12   | 0.04   | 0.07   | 0      | 085 NAA15      | Nat10-like acetyltransferase 15, Naa1 auxiliary subunit                                                          | chr13 | protein_coding |
| ENSG0000007420.14  | 142857968   | 1.39872052 | 2.55E-05   | 0.0001448  | 0.29   | 0.33   | 1      | 123 ABEB1P     | amyloid beta (A4) precursor protein-binding, family B, member 1 interacting protein                              | chr20 | protein_coding |
| ENSG00000279764.1  | 374453497   | 2.2034493  | 0.0001396  | 0.00054609 | 0.02   | 0      | 0.26   | 015 RP11-441F2 | --                                                                                                               | chr16 | TEC            |
| ENSG0000016438.5   | 86920113    | 3.1974465  | 1.92E-32   | 5.54E-40   | 8.76   | 2.9    | 0.05   | TLX3           | T-cell leukemia homeobox 3                                                                                       | chr1  | protein_coding |
| ENSG0000013862.5   | 14620318    | 8.9962286  | 4.51E-07   | 2.75E-06   | 69.04  | 84.92  | 35     | 395 LAMC1      | laminin, gamma 1 (formerly LAMB2)                                                                                | chr1  | protein_coding |
| ENSG0000013267.12  | 8292939     | 1.8601404  | 0.0003012  | 0.0010965  | 0.07   | 0.00   | 0.00   | 001 NCAN       | neurocan                                                                                                         | chr19 | protein_coding |
| ENSG0000024649.7   | 296625556   | 1.2592662  | 9.88E-06   | 4.79E-05   | 0.01   | 0.02   | 0.17   | 006 ZNF266B    | zinc finger protein 266B                                                                                         | chr19 | protein_coding |
| ENSG0000018566.9   | 216726927   | 2.5817366  | 0.0021375  | 0.0049365  | 0      | 0.03   | 0.22   | 0 SNA3         | small family zinc finger 3                                                                                       | chr16 | protein_coding |
| ENSG0000015858.5   | 11727600    | 1.5782867  | 0.01213    | 0.001076   | 0.25   | 0.00   | 0.55   | LSM11          | LSM11 U7 small nuclear RNA associated                                                                            | chr17 | protein_coding |
| ENSG0000013769.17  | 143931803   | 1.85140648 | 1.09E-05   | 5.27E-05   | 0.16   | 0.21   | 0.36   | 098 METTL8     | methyltransferase like 8                                                                                         | chr2  | protein_coding |
| ENSG0000013690.15  | 13382816    | 7.1178766  | 5.18E-24   | 1.67E-22   | 4.45   | 4.18   | 53.24  | 4651 TRIM29    | trypsin motif containing 29                                                                                      | chr11 | protein_coding |
| ENSG0000016776.14  | 1876499     | 1.676499   | 0.0188973  | 0.0041955  | 0.00   | 0.00   | 0.15   | ACE1           | alkaline aminidase                                                                                               | chr19 | protein_coding |
| ENSG00000105329.8  | 14092632    | 6.9246787  | 1.19E-06   | 6.74E-06   | 52.12  | 51.07  | 28.89  | 272 TGFBI      | transforming growth factor, beta 1                                                                               | chr1  | protein_coding |
| ENSG0000017727.10  | -3.610469   | 1.3124693  | 7.47E-20   | 1.78E-18   | 5.02   | 3.69   | 0.61   | 035 CMHR-22P1  | --                                                                                                               | chr11 | lncRNA         |
| ENSG0000010732.10  | 2.0802875   | 1.7468812  | 5.88E-40   | 4.43E-38   | 1.67   | 1.9    | 0.19   | EXP1           | echinoplus 5                                                                                                     | chr19 | protein_coding |
| ENSG0000010928.12  | -1.058621   | 3.6701894  | 0.0003502  | 0.0012172  | 5.91   | 4.22   | 3.24   | 325 DNAAF5     | deafness, autosomal dominant 5                                                                                   | chr7  | protein_coding |
| ENSG0000016598.10  | 4.39366316  | 6.1530126  | 4.54E-40   | 3.46E-38   | 0.32   | 0.34   | 3.95   | 871 RYR1       | ryanodine receptor 1 (skeletal)                                                                                  | chr19 | protein_coding |
| ENSG0000016294.12  | 2.9397387   | 1.5732867  | 1.93E-07   | 0.00034047 | 0.71   | 0.13   | 0.71   | 133 EXT1       | extensin-like glycosyltransferase 1                                                                              | chr19 | protein_coding |
| ENSG0000025479.7   | -1.5074374  | 7.9898782  | 2.08E-07   | 6.41E-06   | 234.43 | 276.9  | 136.92 | 10155 CHCHD10  | coiled-coil helix-coiled-coil helix domain containing 10                                                         | chr22 | protein_coding |
| ENSG0000014684.14  | 4.055821    | 2.2141471  | 1.67E-26   | 1.34E-25   | 0.05   | 0.03   | 0.65   | 102 BOP1       | B double prime 1, subunit of RNA polymerase II transcription initiation factor IIB                               | chr10 | protein_coding |
| ENSG0000012126.11  | -5.7027271  | 4.2282997  | 5.18E-52   | 7.96E-50   | 4.52   | 4.98   | 0.11   | 013 ADCY7      | adenylate cyclase 7                                                                                              | chr16 | protein_coding |
| ENSG0000026468.12  | 4.078467    | -0.6937876 | 3.46E-16   | 6.11E-15   | 0.1    | 0.00   | 0      | 0 CTU1         | --                                                                                                               | chr16 | sense_intronic |
| ENSG00000234284.5  | 2.0735054   | -2.2724913 | 0.0134986  | 0.0331641  | 0.02   | 0      | 0.01   | 013 ZNF879     | zinc finger protein 879                                                                                          | chr19 | protein_coding |
| ENSG0000008997.15  | -1.0770927  | 10.5075584 | 0.0001454  | 0.0006685  | 47.89  | 41.35  | 26.14  | 26206 GANAB    | glucosylase, alpha; neutral AB                                                                                   | chr11 | protein_coding |
| ENSG00000104476.7  | 1.647446    | 0.955308   | 1.51E-08   | 1.13E-07   | 176.1  | 176.1  | 76.1   | 7414 NRP4      | fibronectin type III domain containing protein 4, NRP4                                                           | chr17 | protein_coding |
| ENSG0000010513.12  | -1.2270705  | 8.18571892 | 1.04E-05   | 5.03E-05   | 38.14  | 31.77  | 19.76  | 20233 CHCHD2   | coiled-coil helix-coiled-coil helix domain containing 2                                                          | chr17 | protein_coding |
| ENSG00000184261.4  | 5.5959543   | -2.845919  | 0.0025052  | 0.00565312 | 0      | 0      | 0.04   | 001 KNCN12     | potassium channel, type 2, core domain subfamily K, member 12                                                    | chr19 | protein_coding |
| ENSG0000016599.10  | 2.39861702  | 1.9396871  | 1.93E-06   | 0.00034047 | 0.00   | 0.07   | 0.00   | 0.66 CMT4C     | calpain (calmodulin-like, transmembrane)                                                                         | chr12 | protein_coding |
| ENSG0000012083.12  | 3.0447374   | 0.45070164 | 3.05E-12   | 6.33E-11   | 0.02   | 0.05   | 0.38   | 039 SCS2C      | suppressor of cytokine signaling 2                                                                               | chr14 | protein_coding |
| ENSG0000016678.10  | 1.2673334   | -1.1197256 | 9.98E-06   | 0.0003699  | 0.33   | 0.00   | 0.05   | 055 S100A1     | S100 calcium binding protein A1                                                                                  | chr12 | protein_coding |
| ENSG00000277440.1  | 2.7221039   | -2.2552204 | 0.0028199  | 0.0004087  | 0      | 0.1    | 0.5    | 042 RP11-295D4 | --                                                                                                               | chr16 | sense_intronic |
| ENSG00000163104.16 | 182781073   | 0.5762941  | 2.00E-06   | 1.10E-05   | 0.09   | 0.09   | 0.23   | 062 SMARCA1    | SMN/SMN-related, matrix-associated actin-dependent regulator of chromatin, subfamily a, containing DEAD/DF box 1 | chr16 | protein_coding |
| ENSG0000013769.15  | 18747473    | 1.9387867  | 1.93E-06   | 1.10E-05   | 0.11   | 0.19   | 0.11   | 019 TGA11      | transglutaminase 1                                                                                               | chr19 | protein_coding |
| ENSG0000017829.13  | 2.3053537   | 0.6147698  | 8.52E-09   | 6.59E-08   | 0.02   | 0.06   | 0.15   | 037 GINK       | Ginkgo-Holliday junction 5 flap endonuclease                                                                     | chr2  | protein_coding |
| ENSG0000010526.9   | 2.1802121   | 0.9921538  | 4.64E-09   | 3.72E-08   | 0.23   | 0.37   | 1.96   | 1.66 WAS       | Wiskott-Aldrich syndrome                                                                                         | chr1  | protein_coding |
| ENSG0000023696.2   | 2.00021504  | 2.9353484  | 9.88E-06   | 2.44E-08   | 0.00   | 0.00   | 0.15   | 15 RP11-5407.1 | --                                                                                                               | chr19 | lncRNA         |
| ENSG0000015329.13  | 2.39961508  | 0.59557437 | 5.03E-14   | 7.24E-13   | 0.02   | 0.04   | 0.18   | 059 TRAPPC8    | trafficking protein particle complex 8                                                                           | chr18 | protein_coding |
| ENSG00000154864.10 | -8.370774   | 2.5526498  | 6.11E-52   | 9.28E-50   | 0.66   | 1.01   | 0      | 001 PEZC2      | piezo-type mechanosensitive ion channel component 2                                                              | chr18 | protein_coding |
| ENSG0000027957.1   | 1.699976    | -2.1259922 | 0.0033181  | 0.0045221  | 0.23   | 0.00   | 0.09   | 020 CTG-221P1  | --                                                                                                               | chr1  | antisense      |
| ENSG0000066827.14  | -1.1784165  | 4.2917597  | 6.13E-05   | 0.00025765 | 4.3    | 4.7    | 2.63   | 266 ZFAT       | zinc finger and AT hook domain containing                                                                        | chr8  | protein_coding |
| ENSG0000017131.11  | 1.4883079   | 1.131209   | 2.20E-05   | 0.00010032 | 0.11   | 0.17   | 0.41   | 056 CCDC25     | C2 calcium-dependent domain containing 5                                                                         | chr12 | protein_coding |
| ENSG0000016240.13  | 1.8609127   | 1.319613   | 1.93E-12   | 5.55E-10   | 0.00   | 0.00   | 0.23   | 226 TRAPPC8B   | trafficking protein particle complex 8B                                                                          | chr12 | protein_coding |
| ENSG0000012087.5   | -1.1272795  | 6.0279353  | 9.58E-05   | 0.0003897  | 10.26  | 9.7    | 5.92   | 627 DUSP4      | dual specificity phosphatase 4                                                                                   | chr14 | protein_coding |
| ENSG0000027563.11  | 3.0545458   | -2.823992  | 0.0001345  | 0.00034047 | 0.00   | 0.00   | 0.08   | RP11-480C1     | --                                                                                                               | chr19 | lncRNA         |
| ENSG0000014002.8   | 2.20623622  | 1.54536401 | 2.94E-10   | 2.76E-09   | 0.2    | 0.16   | 0.18   | 105 STON2      | stomatin 2                                                                                                       | chr14 | protein_coding |
| ENSG0000019526.11  | 3.10644653  | 0.1205751  | 2.14E-11   | 2.30E-10   | 0.08   | 0      | 0.43   | 047 MORC3      | MORC family CW-type zinc finger 3                                                                                | chr21 | protein_coding |
| ENSG0000026756.11  | 1.7746854   | -1.827538  | 0.0033181  | 0.0045221  | 0.11   | 0.00   | 0.17   | 012 AC034534.2 | --                                                                                                               | chr1  | antisense      |
| ENSG00000248890.1  | -7.6014249  | -1.3520822 | 2.11E-11   | 2.27E-10   | 0.43   | 0.33   | 0      | 0 RHP-AS1      | RHP antisense RNA 1                                                                                              | chr4  | antisense      |
| ENSG00000197442.9  | 2.0523873   | 2.1566734  | 4.64E-10   | 4.23E-09   | 0.21   | 0.32   | 0.07   | 152 MAPK9S     | mitogen-activated protein kinase kinase 5                                                                        | chr16 | protein_coding |
| ENSG0000015727.11  | 1.583087    | 1.158282   | 1.78E-07   | 1.17E-07   | 0.00   | 0.00   | 0.07   | 008 ARHGAP20   | Rho GTPase activating protein 20                                                                                 | chr16 | protein_coding |
| ENSG00000505444.9  | 1.37178615  | 4.72070525 | 2.99E-06   | 1.61E-05   | 4.51   | 7.11   | 14.31  | 2594 NOP58     | NOP58 ribonucleoprotein                                                                                          | chr10 | protein_coding |
| ENSG0000015246.16  | 1.2132948   | 2.9474247  | 6.95E-05   | 0.0003893  | 0.94   | 1.59   | 3.55   | 426 NM12       | N-methyltransferase 2                                                                                            | chr10 | protein_coding |
| ENSG0000017286.10  | 1.8096913   | 2.8099871  | 8.52E-32   | 3.38E-30   | 0.00   | 0.00   | 0.00   | 031 SH3 domain | SH3 domain containing zinc finger 3                                                                              | chr10 | protein_coding |
| ENSG0000012833.11  | -5.1447423  | 0.09489614 | 1.35E-20   | 3.41E-19   | 0.82   | 0.93   | 0.00   | 0.06 APOBEC3A  | apolipoprotein B RNA editing enzyme, catalytic polypeptide-like 3A                                               | chr22 | protein_coding |
| ENSG0000025578.11  | 1.200225578 | 2.4096964  | 0.001221   | 0.004145   | 0.63   | 0.05   | 0.05   | 014 NCBP2-AS1  | NCBP2 antisense RNA 1                                                                                            | chr1  | antisense      |
| ENSG00000118       |             |            |            |            |        |        |        |                |                                                                                                                  |       |                |

|                 |             |             |            |            |        |        |               |               |                                        |                                                        |                |                    |                |
|-----------------|-------------|-------------|------------|------------|--------|--------|---------------|---------------|----------------------------------------|--------------------------------------------------------|----------------|--------------------|----------------|
| ENS00000026979  | 1-4079387   | 3-2306674   | 010889873  | 004519557  | 0.03   | 0.07   | 0             | 0.94          | ITFA                                   | lymphotxin alpha                                       | chr6           | protein_coding     |                |
| ENS00000026980  | 1-1282396   | 3-4887280   | 1.187E-05  | 8.64E-05   | 2.11   | 2.04   | 133           | 0             | 0                                      | intermediate filament family orphan Z                  | chr1           | protein_coding     |                |
| ENS00000026981  | 1-1943949   | 3-4636350   | 0.0004302  | 0.0015520  | 1.01   | 0.87   | 274           | 242           | PDCHAP41                               | proteohexan gamma subunit A.1                          | chr1           | protein_coding     |                |
| ENS00000026982  | 1-111110    | 3-1088695   | 1.29E-09   | 1.22E-09   | 2.98   | 2.98   | 111           | 238           | ABRGEST3                               | Rho guanine nucleotide exchange factor (GEF) 37        | chr5           | protein_coding     |                |
| ENS00000026983  | 1-13982397  | 3-15721537  | 3.09E-05   | 0.00031712 | 0.22   | 0.27   | 057           | 116           | SEC24B                                 | SEC24 family member B                                  | chr4           | protein_coding     |                |
| ENS000000275023 | 2-3623219   | 2-7681163   | 8.93E-11   | 8.98E-10   | 0.36   | 0.4    | 155           | 172           | SMR2C                                  | SMK homolog 2, suppressor of mek1 (Drosophila)         | chr4           | protein_coding     |                |
| ENS000000275024 | 1-1082765   | 1-1058627   | 1.00E-04   | 1.00E-04   | 1.00   | 1.00   | 1031          | 1036          | RL1-1                                  | RL1-1                                                  | chr10          | lncRNA             |                |
| ENS000000275025 | 1-11554769  | 3-76861225  | 0.0015036  | 0.0047425  | 0.25   | 0.33   | 701           | 12            | RP11-81A11L-1                          | RP11-81A11-1                                           | chr15          | sense_intronic     |                |
| ENS000000275026 | 1-120303627 | 1-120303627 | 0.0000000  | 0.0000000  | 0.07   | 0.17   | 275           | 10            | LOC100288192                           | LIQ and tumor necrosis factor related protein 2        | chr15          | protein_coding     |                |
| ENS00000033588  | 1-14753278  | 1-12068025  | 0.00007    | 0.0009098  | 0.06   | 0.17   | 027           | 055           | FBXL2                                  | F-box and leucine-rich repeat protein 2                | chr2           | protein_coding     |                |
| ENS00000033589  | 1-10797985  | 2-3021027   | 0.00072854 | 0.0024692  | 0.59   | 0.56   | 126           | 194           | UBA5                                   | ubiquitin-like modifier activating enzyme 5            | chr3           | protein_coding     |                |
| ENS00000034099  | 1-9718106   | 1-1002966   | 0.0000000  | 0.0000000  | 0.4    | 0.4    | 140           | 1             | POK4                                   | prostate derived homeobox like kinase, isoform 4       | chr1           | protein_coding     |                |
| ENS00000034098  | 1-20931812  | 3-28554285  | 2.04E-11   | 2.21E-10   | 0.07   | 0.17   | 237           | 458           | MOB1A                                  | MOB kinase activator 1                                 | chr2           | protein_coding     |                |
| ENS00000034099  | 1-12308425  | 1-1083324   | 0.0003282  | 0.0013948  | 0.82   | 0.07   | 03            | 07            | ASB9                                   | ASB family and SOCS box containing 9                   | chr1           | protein_coding     |                |
| ENS00000034098  | 1-20975007  | 2-408811    | 0.0003525  | 0.0003525  | 0.9    | 0.05   | 0             | 0             | ADPR-antennae RNA                      | ADPR-antennae RNA                                      | chr2           | antisense          |                |
| ENS00000034098  | 1-2790159   | 1-2617502   | 0.0014675  | 0.0046747  | 0.45   | 0.24   | 009           | 0.04          | ADP17014.6                             | ADP17014.6                                             | chr2           | crossed_transcript |                |
| ENS00000032389  | 1-6575035   | 1-2610225   | 1.78E-06   | 9.85E-06   | 0.14   | 0.11   | 01            | 0             | CA8PA                                  | complement component 4 binding protein, alpha          | chr1           | protein_coding     |                |
| ENS00000032389  | 1-20978179  | 3-183444    | 0.0000000  | 0.0000000  | 0.11   | 0.35   | 0             | 0             | KCNAC2                                 | potassium channel, two pore domain subunit A, member 2 | chr7           | protein_coding     |                |
| ENS000000341533 | 1-755588405 | 1-1180946   | 2.11E-11   | 2.27E-10   | 0      | 0      | 027           | 0             | NOTO                                   | notochord homeobox                                     | chr7           | protein_coding     |                |
| ENS000000341534 | 1-22543573  | 1-2581978   | 0.0011926  | 0.0011926  | 0.08   | 0.21   | 082           | 234           | ACTR6                                  | homeobox A2                                            | chr2           | protein_coding     |                |
| ENS000000341535 | 1-3103021   | 1-1478666   | 6.52E-15   | 1.53E-13   | 0.08   | 0.21   | 082           | 234           | ACTR6                                  | actin related protein 6 homolog (yeast)                | chr2           | protein_coding     |                |
| ENS000000341536 | 1-1132374   | 1-74877804  | 8.69E-05   | 0.0003489  | 93.17  | 76.48  | 5365          | 4945          | TSTA3                                  | tissue specific translocation antigen P58              | chr1           | protein_coding     |                |
| ENS000000341537 | 1-20959819  | 1-7710515   | 0.0000000  | 0.0000000  | 0.25   | 0.25   | 188           | SNAP23        | synaptosomal-associated protein, 23kDa | chr2                                                   | protein_coding |                    |                |
| ENS00000034524  | 1-12619405  | 1-4664661   | 1.65E-06   | 7.74E-05   | 1.58   | 4.58   | 1163          | 162           | AKR1A1                                 | akrin 1                                                | chr1           | protein_coding     |                |
| ENS000000344918 | 1-1608174   | 1-99674565  | 6.68E-08   | 2.60E-07   | 280.36 | 280.14 | 12667         | 11615         | RP515A                                 | ribosomal protein S15a                                 | chr1           | protein_coding     |                |
| ENS000000344919 | 1-5492920   | 1-59952015  | 0.0000000  | 0.0000000  | 0.15   | 0.15   | 07            | 0             | LOC100288192                           | prostate derived homeobox like kinase, isoform 2       | chr15          | protein_coding     |                |
| ENS000000344918 | 1-2594265   | 1-1557207   | 3.51E-05   | 0.0002749  | 0.11   | 0.17   | 002           | 0.04          | MCOLN2                                 | mucopolysaccharide receptor subunit 2                  | chr1           | protein_coding     |                |
| ENS000000340471 | 1-5226735   | 1-2777768   | 0.0009502  | 0.0009502  | 0.0    | 0.21   | 02            | 0.02          | KRT2P                                  | keratin (chemosensory) transporter protein 2           | chr1           | protein_coding     |                |
| ENS000000340472 | 1-32195931  | 1-5427774   | 0.000327   | 0.000327   | 0.04   | 0.26   | 0.04          | 0.06          | 0.04                                   | LOC11-33311L-1                                         | LOC11-33311L-1 | chr1               | protein_coding |
| ENS000000340473 | 1-5245479   | 1-1000000   | 0.0000000  | 0.0000000  | 0.9    | 0.9    | 0             | 0             | LOC11-33311L-1                         | LOC11-33311L-1                                         | chr1           | lncRNA             |                |
| ENS000000340474 | 1-1209702   | 1-2863714   | 7.70E-05   | 0.0003179  | 0.96   | 0.96   | 198           | 379           | AB1                                    | ab-tubulin                                             | chr10          | protein_coding     |                |
| ENS000000340475 | 1-11339912  | 1-2561621   | 0.0011926  | 0.0011926  | 0.08   | 0      | 0             | 0             | GALT3                                  | polypeptide N-acetylglucosaminyltransferase 3          | chr2           | protein_coding     |                |
| ENS000000340476 | 1-4609028   | 1-1000000   | 0.0000000  | 0.0000000  | 23.46  | 23.46  | 483           | 483           | APRCL                                  | actin related protein 2/3 complex, subunit 5           | chr2           | protein_coding     |                |
| ENS000000340477 | 1-4581239   | 1-31159061  | 2.71E-15   | 1.61E-13   | 0.32   | 0.32   | 815           | 847           | USP1F                                  | ubiquitin specific peptidase 18                        | chr22          | protein_coding     |                |
| ENS000000340478 | 1-10078864  | 1-10928756  | 1.30E-07   | 1.59E-07   | 0.07   | 0.21   | 0.05          | 0.04          | PTC7                                   | PTC7 protein specific translocation homolog G, 5kDa    | chr1           | protein_coding     |                |
| ENS000000340479 | 1-1314629   | 1-800789    | 0.0003094  | 0.0048051  | 0.11   | 0.11   | RP11-187N1L-1 | RP11-187N1L-1 | chr1                                   | protein_coding                                         |                |                    |                |
| ENS000000340480 | 1-1262805   | 1-3480442   | 1.28E-05   | 6.11E-05   | 19.28  | 17.5   | 1002          | 1042          | RP11-287D1L-1                          | RP11-287D1L-1                                          | chr1           | protein_coding     |                |
| ENS000000340481 | 1-4884317   | 1-3005059   | 0.0089873  | 0.0319557  | 0      | 0      | 0.18          | 0.18          | LOC11-34502L-1                         | LOC11-34502L-1                                         | chr1           | TEC                |                |
| ENS000000340482 | 1-1809513   | 1-2383359   | 2.62E-07   | 1.02E-06   | 0.44   | 1.04   | 0.04          | 1.04          | LOC11-34502L-1                         | LOC11-34502L-1                                         | chr1           | protein_coding     |                |
| ENS000000340483 | 1-31217081  | 1-06501781  | 2.85E-13   | 3.78E-12   | 0.05   | 0.05   | 0.05          | 0.05          | LOC11-34502L-1                         | LOC11-34502L-1                                         | chr1           | protein_coding     |                |
| ENS000000340484 | 1-35181437  | 1-018048745 | 1.00E-09   | 1.00E-11   | 0.48   | 0.48   | 0.48          | 0.48          | LOC11-34502L-1                         | LOC11-34502L-1                                         | chr1           | protein_coding     |                |
| ENS000000340485 | 1-13981198  | 1-031472845 | 0.0001313  | 0.0021994  | 0.72   | 1.0    | 0.52          | 0.52          | LOC11-34502L-1                         | LOC11-34502L-1                                         | chr1           | protein_coding     |                |
| ENS000000340486 | 1-1060305   | 1-57064965  | 0.0002503  | 0.0003383  | 14.68  | 12.67  | 833           | 913           | Chor3                                  | chromosome 9 open reading frame 3                      | chr9           | protein_coding     |                |
| ENS000000340487 | 1-26161524  | 1-1000000   | 0.0000000  | 0.0000000  | 2.08   | 2.08   | 2.08          | 2.08          | EPASBP2                                | epithelial specific protein 2                          | chr1           | protein_coding     |                |
| ENS000000340488 | 1-53770238  | 2-90133968  | 1.60E-10   | 1.26E-38   | 0.07   | 0.07   | 205           | 251           | FAM111A                                | family with sequence similarity 111, member A          | chr1           | protein_coding     |                |
| ENS000000340489 | 1-19624080  | 1-2269191   | 1.80E-09   | 1.52E-08   | 0.54   | 1.32   | 249           | 303           | NMD3                                   | NMD3 ribosome export adaptor                           | chr1           | protein_coding     |                |
| ENS000000340490 | 1-1311131   | 1-1000000   | 0.0000000  | 0.0000000  | 0.46   | 0.46   | 1.04          | 1.04          | LOC11-34502L-1                         | LOC11-34502L-1                                         | chr1           | protein_coding     |                |
| ENS000000340491 | 1-33115145  | 1-1869843   | 0.0002363  | 0.0004222  | 0      | 0.03   | 0.24          | 0.24          | NDP1A                                  | speedy/RINGO cell cycle regulator family member A      | chr3           | protein_coding     |                |
| ENS000000340492 | 1-1359366   | 1-9440235   | 2.54E-06   | 3.8E-05    | 49.45  | 40.01  | 252.34        | 214.71        | RP515A                                 | ribosomal protein S9                                   | chr1           | protein_coding     |                |
| ENS000000340493 | 1-21545298  | 1-8868743   | 0.0003655  | 0.0013124  | 0.79   | 0.81   | 212           | 298           | CHN1                                   | chimerin 1                                             | chr1           | protein_coding     |                |
| ENS000000340494 | 1-1256867   | 1-2578753   | 0.0012315  | 0.045865   | 0.05   | 0.15   | 0             | 0             | CALR3                                  | calreticulin 3                                         | chr1           | protein_coding     |                |
| ENS000000340495 | 1-2604252   | 1-2604252   | 5.16E-22   | 1.06E-21   | 29.36  | 52.2   | 0.05          | 0.05          | LOC11-34502L-1                         | LOC11-34502L-1                                         | chr1           | protein_coding     |                |
| ENS000000340496 | 1-3407173   | 1-0518211   | 1.03E-10   | 1.03E-09   | 0.28   | 0.46   | 0             | 0             | SM1                                    | serpin, alpha 1, angiotensin inhibitor                 | chr1           | protein_coding     |                |
| ENS000000340497 | 1-1000000   | 1-1000000   | 0.0000000  | 0.0000000  | 0.48   | 0.48   | 0.48          | 0.48          | LOC11-34502L-1                         | LOC11-34502L-1                                         | chr1           | protein_coding     |                |
| ENS000000340498 | 1-3561489   | 1-0219214   | 4.26E-15   | 6.86E-14   | 0.5    | 0.24   | 0.04          | 0.04          | TYH2                                   | twisted family member 2                                | chr17          | protein_coding     |                |
| ENS000000340499 | 1-1058732   | 1-1315465   | 0.0089873  | 0.0319557  | 0.05   | 0      | 0             | 0             | PHB2                                   | proteohexan beta 2                                     | chr1           | protein_coding     |                |
| ENS000000340500 | 1-20347876  | 1-2986124   | 0.0000000  | 0.0000000  | 0.5    | 0.5    | 17            | 0.07          | LOC11-34502L-1                         | LOC11-34502L-1                                         | chr1           | protein_coding     |                |
| ENS000000340501 | 1-19437064  | 1-8314326   | 0.0067596  | 0.0128445  | 0.01   | 0.23   | 0.02          | 0.02          | LOC11-34502L-1                         | LOC11-34502L-1                                         | chr1           | sense_intronic     |                |
| ENS000000340502 | 1-1881768   | 1-6841924   | 1.70E-10   | 1.64E-09   | 105.11 | 93.52  | 43.69         | 27.75         | RASL                                   | related Ras viral r-ras oncogene homolog               | chr19          | protein_coding     |                |
| ENS000000340503 | 1-2310323   | 1-1742422   | 1.00E-08   | 1.00E-08   | 0.78   | 0.78   | 0.78          | 0.78          | LOC11-34502L-1                         | LOC11-34502L-1                                         | chr1           | protein_coding     |                |
| ENS000000340504 | 1-2033038   | 1-1265976   | 0.0061421  | 0.0167895  | 3.22   | 2.39   | 0.39          | 0.39          | LOC11-34502L-1                         | LOC11-34502L-1                                         | chr1           | protein_coding     |                |
| ENS000000340505 | 1-1062398   | 1-2695944   | 0.0012315  | 0.046803   | 0.58   | 0.58   | 0.58          | 0.58          | LOC11-34502L-1                         | LOC11-34502L-1                                         | chr1           | protein_coding     |                |
| ENS000000340506 | 1-3304172   | 1-458904    | 1.00E-09   | 1.00E-09   | 45.24  | 37.4   | 0.05          | 0.05          | LOC11-34502L-1                         | LOC11-34502L-1                                         | chr1           | protein_coding     |                |
| ENS000000340507 | 1-1973735   | 1-05943612  | 2.11E-10   | 2.02E-09   | 6.21   | 6.69   | 233           | 204           | TWIST1                                 | twist family BHLH transcription factor 1               | chr3           | protein_coding     |                |
| ENS000000340508 | 1-1000000   | 1-1000000   | 0.0000000  | 0.0000000  | 1.19   | 1.19   | 0.16          | 0.16          | LOC11-34502L-1                         | LOC11-34502L-1                                         | chr1           | protein_coding     |                |
| ENS000000340509 | 1-2046028   | 1-0944362   | 8.80E-07   | 5.11E-06   | 1.11   | 0.97   | 0.49          | 0.2           | TPR1                                   | TPR1                                                   | chr1           | protein_coding     |                |
| ENS000000340510 | 1-1826151   | 1-53771142  | 6.38E-10   | 5.72E-09   | 15.95  | 12.33  | 57            | 492           | RP11-3300H-1                           | RP11-3300H-1                                           | chr1           | protein_coding     |                |
| ENS000000340511 | 1-8370667   | 1-0001928   | 1.00E-09   | 1.00E-09   | 0.49   | 0.49   | 0.49          | 0.49          | LOC11-34502L-1                         | LOC11-34502L-1                                         | chr1           | protein_coding     |                |
| ENS000000340512 | 1-62302796  | 1-6175577   | 1.10E-24   | 3.71E-23   | 0      | 0.02   | 1.06          | 0.69          | ATG9B                                  | atrophin related 9B                                    | chr7           | protein_coding     |                |
| ENS000000340513 | 1-32271569  | 1-2543599   | 0.000327   | 0.0094516  | 0      | 0.06   | 0.53          | 0.34          | LOC11-34502L-1                         | LOC11-34502L-1                                         | chr1           | protein_coding     |                |
| ENS000000340514 | 1-2327223   | 1-481933    | 1.38E-05   | 5.44E-05   | 0.28   | 0.17   | 0.35          | 0.17          | LOC11-34502L-1                         | LOC11-34502L-1                                         | chr1           | lncRNA             |                |
| ENS000000340515 | 1-1089992   | 1-0051799   | 0.0003957  | 0.0007892  | 3.25   | 4.29   | 199           | 27            | RP11-51195-1                           | RP11-51195-1                                           | chr1           | lncRNA             |                |
| ENS000000340516 | 1-3287513   | 1-0410395   | 4.32E-09   | 4.94E-08   | 0.05   | 0.05   | 0.43          | 0.43          | CEP90                                  | centromere protein 9                                   | chr1           | protein_coding     |                |
| ENS000000340517 | 1-340022    | 1-340022    | 1.00E-09   | 1.00E-09   | 0.25   | 0.32   | 132           | 132           | LOC11-34502L-1                         | LOC11-34502L-1                                         | chr1           | protein_coding     |                |
| ENS000000340518 | 1-39791075  | 1-03441384  | 2.02E-15   | 3.54E-14   | 0.04   | 0.92   | 19            | 19            | LOC11-34502L-1                         | LOC11-34502L-1                                         | chr1           | protein_coding     |                |
| ENS000000340519 | 1-1000000   | 1-1000000   | 0.0000000  | 0.0000000  | 14.14  | 14.14  | 14.14         | 14.14         | BAH2P1                                 | BAH2P1                                                 | chr1           | protein_coding     |                |
| ENS000000340520 | 1-19681302  | 1-0574376   | 4.25E-05   | 0.0001846  | 0.05   | 0.23   | 0.13          | 0.13          | PD7E                                   | phosphatidylesterase 7B                                | chr1           | protein_coding     |                |
| ENS000000340521 | 1-1373975   | 1-3025896   | 2.00E-06   | 1.15E-05   | 91.99  | 85.98  | 4337          | 4826          | EXOSC2                                 | exosome component 2                                    | chr9           | protein_coding     |                |
| ENS000000340522 | 1-1000000   | 1-1000000   | 0.0000000  | 0.0000000  | 0.01   | 0.16   | 0.06          | 0.16          | LOC11-34502L-1                         | LOC11-34502L-1                                         | chr1           | protein_coding     |                |
| ENS000000340523 | 1-12007121  | 1-1215900   | 0.0056625  | 0.0002383  | 0.32   | 0.47   | 198           | 0.71          | SCARN2                                 | small Caudal-like protein 2                            | chr1           | protein_coding     |                |
| ENS000000340524 | 1-29047127  | 1-1100789   | 1.10E-13   | 1.53E-12   | 0.07   | 0.16   | 0.05          | 0.16          | LOC11-34502L-1                         | LOC11-34502L-1                                         |                |                    |                |

|                    |            |            |            |            |         |         |         |         |              |                                                                                                                        |       |                      |
|--------------------|------------|------------|------------|------------|---------|---------|---------|---------|--------------|------------------------------------------------------------------------------------------------------------------------|-------|----------------------|
| ENSG0000018865.9   | 1.4674989  | 0.15364897 | 0.00032853 | 0.00181768 | 0.14    | 0.26    | 0.05    | 0.82    | DUS4L        | dihydropyridine synthase 4-like (S. cerevisiae)                                                                        | chr7  | protein_coding       |
| ENSG0000018402.13  | 1.1652922  | 0.2584344  | 0.00017683 | 0.001578   | 0.7     | 0.03    | 0.02    | 2.44    | ESR1B1       | estrogen receptor, beta, nuclear hormone receptor                                                                      | chr20 | protein_coding       |
| ENSG0000018406.17  | 2.403999   | 0.2584344  | 0.00017683 | 0.001578   | 0.7     | 0.03    | 0.02    | 0.35    | EDM3         | ER degradation enhancer, mannosidase alpha-like 1                                                                      | chr1  | protein_coding       |
| ENSG0000015661.12  | 1.9090453  | 5.53995746 | 1.166-10   | 1.15E-09   | 16.33   | 15.67   | 0.62    | 5.31    | STK16        | serine/threonine kinase 16                                                                                             | chr1  | protein_coding       |
| ENSG00000204874.4  | 1.9789579  | 1.981781   | 0.00017683 | 0.001578   | 0.7     | 0.03    | 0.02    | 0.05    | AC0222182    | ...                                                                                                                    | chr1  | lncRNA               |
| ENSG00000166454.8  | 2.00053076 | 3.54607282 | 8.27E-11   | 8.34E-10   | 0.61    | 0.64    | 2.68    | 4       | ATMIN        | ATM interactor                                                                                                         | chr16 | protein_coding       |
| ENSG00000181908.5  | 2.44195762 | 1.7364555  | 0.00095666 | 0.00015336 | 0       | 0.05    | 0.25    | 0.12    | AR0073744    | ...                                                                                                                    | chr11 | lncRNA               |
| ENSG0000018711.9   | 1.3276757  | 0.01736278 | 6.09E-13   | 7.70E-12   | 0.1     | 0.07    | 0.16    | 0.08    | PLA2G4A      | phospholipase A2, group IVA (cytosolic, calcium-dependent)                                                             | chr1  | protein_coding       |
| ENSG00000266112.1  | 6.19050648 | 2.2628719  | 2.70E-05   | 0.00012904 | 0       | 0       | 0.57    | 0.59    | RP11-62H20-- | ...                                                                                                                    | chr14 | antisense            |
| ENSG00000267280.4  | 1.8131795  | 2.490403   | 1.24E-09   | 5.66E-08   | 6.21    | 5.52    | 3.24    | 2.05    | TRIC-AS1     | TBK2 antisense RNA 1                                                                                                   | chr1  | antisense            |
| ENSG00000207817.1  | 1.0547418  | 2.253411   | 7.15E-10   | 6.39E-09   | 0.49    | 0.53    | 0.49    | 3.78    | GLA17B       | discl. large (Drosophila) homolog-associated protein 5                                                                 | chr14 | protein_coding       |
| ENSG00000179846.8  | 5.4500894  | 0.77686591 | 1.97E-24   | 6.54E-23   | 0.02    | 0       | 0.63    | 0.79    | NP0P1        | NTPase, KAP family P-loop domain containing 1                                                                          | chr19 | protein_coding       |
| ENSG0000017592.7   | 1.7930495  | 1.8907756  | 1.08E-07   | 7.21E-07   | 0.55    | 0.87    | 1.71    | 4.91    | LACTB2       | lactamase, beta 2                                                                                                      | chr1  | protein_coding       |
| ENSG00000083312.6  | 1.6309344  | 4.31362762 | 4.46E-08   | 3.12E-07   | 0.69    | 0.7     | 2.16    | 3.61    | TNP01        | transcriptin 1                                                                                                         | chr1  | protein_coding       |
| ENSG00000278671.1  | 1.42717934 | 1.483649   | 2.19E-05   | 9.98E-05   | 2.18    | 3.89    | 12.72   | 8.94    | HST1H2AM     | histone H2A1, H2am                                                                                                     | chr5  | protein_coding       |
| ENSG00000165311.8  | 1.27400367 | 1.3891183  | 0.0001614  | 0.00030959 | 0.56    | 4.6     | 1.54    | 2.22    | ANKRD2       | ankyrin repeat family A (RFXANK-like), 2                                                                               | chr5  | protein_coding       |
| ENSG0000019565.7   | 1.3200222  | 7.2734949  | 5.03E-06   | 2.59E-05   | 29.45   | 26.87   | 87.59   | 99.51   | NPC2         | Niemann-Pick disease, type C2                                                                                          | chr14 | protein_coding       |
| ENSG00000214063.9  | 1.1136984  | 6.5768363  | 8.12E-05   | 0.00033385 | 60.17   | 50.87   | 35.87   | 31.34   | TPSN4N       | tetraspanin 4                                                                                                          | chr11 | protein_coding       |
| ENSG00000140447.19 | 4.4159877  | 4.14402792 | 1.08E-37   | 7.20E-35   | 0.06    | 0.12    | 0.25    | 0.25    | CCN1         | Gli family zinc finger 2                                                                                               | chr2  | protein_coding       |
| ENSG00000173951.1  | 1.6337282  | 0.27561626 | 5.18E-05   | 0.00020246 | 0.16    | 0.19    | 0.58    | 0.89    | RP11-521B2-- | WD repeat containing planar cell polarity effector                                                                     | chr14 | TEC                  |
| ENSG00000149451.4  | 1.9595662  | 0.35801741 | 6.19E-07   | 4.78E-06   | 0.02    | 0.07    | 0.22    | 0.27    | WDRCP        | WD repeat containing planar cell polarity effector                                                                     | chr12 | protein_coding       |
| ENSG00000082497.10 | 1.27400367 | 1.3891183  | 0.0001614  | 0.00030959 | 0.56    | 4.6     | 1.54    | 2.22    | ANKRD2       | ankyrin repeat family A (RFXANK-like), 2                                                                               | chr5  | protein_coding       |
| ENSG00000101336.11 | 3.49920679 | 1.7117103  | 4.49E-05   | 0.00019431 | 0.02    | 0       | 0.22    | 0.22    | HCK          | HCK proto-oncogene, Src family tyrosine kinase                                                                         | chr20 | protein_coding       |
| ENSG00000138291.12 | 1.47669914 | 1.44809352 | 1.17E-05   | 5.59E-05   | 0.21    | 0.15    | 0.05    | 0.07    | MEM13        | transmembrane protein 13                                                                                               | chr12 | protein_coding       |
| ENSG0000026531.11  | 6.7654536  | 2.2259794  | 8.86E-45   | 8.92E-43   | 7.51    | 2.98    | 0.05    | 0.07    | RSL1         | rat guanine nucleotide dissociation stimulator-like 3                                                                  | chr1  | protein_coding       |
| ENSG00000251095.5  | 2.401895   | 1.3025998  | 0.0001901  | 0.00043503 | 0.02    | 0.01    | 0.08    | 0.11    | RP11-115D1-- | ...                                                                                                                    | chr1  | antisense            |
| ENSG00000144217.10 | 2.0372318  | 0.0166327  | 9.73E-05   | 0.00061818 | 0.04    | 0.07    | 0.26    | 0.33    | CCN1         | zinc finger, C2HC-type containing 1A                                                                                   | chr9  | protein_coding       |
| ENSG0000027362.12  | 2.42293196 | 0.02764436 | 6.50E-08   | 4.48E-07   | 0.09    | 0.07    | 0.42    | 0.72    | ABHD17B      | abhydrolase domain containing 17B                                                                                      | chr9  | protein_coding       |
| ENSG00000214562.8  | 1.1151766  | 6.67954056 | 0.0001917  | 0.00043559 | 104.33  | 96.99   | 64.95   | 58.75   | SNRPC        | snRNP core protein, ribonucleoprotein polypeptide C                                                                    | chr6  | protein_coding       |
| ENSG0000016488.7   | 1.0789235  | 2.018793   | 0.0004461  | 0.0012013  | 0       | 0.03    | 0.2     | 0.13    | CTNBP1       | cytoskeleton-associated protein 1                                                                                      | chr1  | protein_coding       |
| ENSG00000178904.17 | 1.71461973 | 0.59997958 | 5.94E-06   | 3.01E-05   | 0.06    | 0.08    | 0.23    | 0.34    | DPY19L3      | day-19 like 3 (C. elegans)                                                                                             | chr19 | protein_coding       |
| ENSG00000197415.10 | 1.68912621 | 1.3238696  | 0.0036829  | 0.0103682  | 0.05    | 0       | 0.08    | 0.12    | VEPFI        | ventricular zone expressed PH domain-containing 1                                                                      | chr1  | protein_coding       |
| ENSG00000166664.12 | 1.26802129 | 2.8845113  | 0.0151667  | 0.032166   | 0.05    | 0.04    | 0.15    | 0.27    | CHRNA7       | cholinergic receptor, nicotinic, alpha 7 (alpha 5-10) and FAM7A (family with sequence similarity 7A, exons A-E) fusion | chr1  | protein_coding       |
| ENSG0000011432.4   | 4.4771703  | 3.67400489 | 4.67E-40   | 3.55E-38   | 6.14    | 6.02    | 2.29    | 0.73    | CZD10        | fizzled class receptor 10                                                                                              | chr12 | protein_coding       |
| ENSG00000167202.10 | 1.2905995  | 5.7651172  | 8.86E-45   | 8.92E-43   | 7.51    | 2.98    | 0.05    | 0.07    | RSL1         | TBK2 domain family, member 2B                                                                                          | chr1  | protein_coding       |
| ENSG0000010241.6   | 1.0547418  | 2.253411   | 7.15E-10   | 6.39E-09   | 0.49    | 0.53    | 0.49    | 3.78    | GLA17B       | discl. large (Drosophila) homolog-associated protein 5                                                                 | chr14 | protein_coding       |
| ENSG0000017493.19  | 2.24793601 | 4.05281879 | 2.39E-13   | 3.15E-12   | 0.46    | 0.49    | 2.7     | 3.36    | AFI1         | AFI4/RN2 family, member 1                                                                                              | chr4  | protein_coding       |
| ENSG00000105979.13 | 1.3202492  | 0.0166327  | 9.73E-05   | 0.00061818 | 0.04    | 0.07    | 0.26    | 0.33    | CCN1         | zinc finger, C2HC-type containing 1A                                                                                   | chr9  | protein_coding       |
| ENSG00000106999.28 | 2.19117588 | 0.06999928 | 4.22E-07   | 2.59E-06   | 0.02    | 0.06    | 0.11    | 0.39    | CEP135       | centrosomal protein 135kDa                                                                                             | chr10 | protein_coding       |
| ENSG00000166866.11 | 2.3267993  | 2.4471895  | 0.0024943  | 0.0485277  | 0.07    | 0.02    | 0.02    | 0.02    | MYO1A        | myosin IA                                                                                                              | chr12 | protein_coding       |
| ENSG00000130203.8  | 2.44244904 | 3.44549616 | 6.51E-13   | 8.45E-12   | 16.86   | 14.79   | 49.07   | 14.79   | AFK1         | afadin-like protein E                                                                                                  | chr1  | protein_coding       |
| ENSG00000104971.11 | 1.829989   | 0.0496673  | 2.10E-06   | 1.15E-05   | 0.02    | 0.36    | 0.73    | 0.13    | DHX58        | DEKH (Arg-Glu-X-His) box polypeptide 58                                                                                | chr17 | protein_coding       |
| ENSG0000016525.16  | 2.39542799 | 2.66895082 | 1.81E-13   | 2.43E-12   | 0.23    | 0.27    | 1.1     | 2.46    | MEM          | neuronal growth modulator                                                                                              | chr14 | protein_coding       |
| ENSG00000128395.1  | 1.8982462  | 2.3832028  | 0.0003332  | 0.00140078 | 0.01    | 0.02    | 0.11    | 0.02    | RP11-216B9-- | ...                                                                                                                    | chr1  | antisense            |
| ENSG00000175348.8  | 1.148531   | 4.7049899  | 8.26E-05   | 0.00033936 | 25.37   | 25.33   | 1463    | 15.86   | LSM1         | LSM1, U6 small nuclear RNA associated                                                                                  | chr8  | protein_coding       |
| ENSG00000184028.11 | 1.4934981  | 1.71596612 | 5.20E-06   | 2.66E-05   | 1.43    | 1.73    | 0.73    | 0.58    | TBX1         | T-box 1                                                                                                                | chr22 | protein_coding       |
| ENSG00000121967.7  | 4.05281879 | 1.45293984 | 3.90E-46   | 3.00E-38   | 0.45    | 0.22    | 0.1     | 0       | MKCA5A       | melanoma antigen family A3                                                                                             | chr1  | protein_coding       |
| ENSG00000133475.15 | 0.8029278  | 0.9428312  | 5.27E-14   | 7.56E-13   | 0.42    | 0.25    | 0       | 0       | GGT2         | gamma-glutamyltransferase 2                                                                                            | chr22 | protein_coding       |
| ENSG00000109139.12 | 7.9454447  | 1.0451986  | 1.29E-05   | 7.33E-34   | 0.1     | 0.43    | 0       | 0.43    | PCSK5        | proprotein convertase subtilisin/kexin type 5                                                                          | chr9  | protein_coding       |
| ENSG0000016752.13  | 1.073003   | 8.7838777  | 0.00018633 | 0.00070721 | 307.01  | 280.14  | 185.37  | 186.65  | PP2S         | farnebsyl diphosphate synthase                                                                                         | chr1  | protein_coding       |
| ENSG0000024125.3   | 1.1760525  | 4.72243982 | 5.67E-05   | 0.00023954 | 11.56   | 11.08   | 7.72    | 5.58    | SHHG3        | small nuclear RNA host gene 3                                                                                          | chr1  | sense_intronic       |
| ENSG00000106211.8  | 1.868307   | 1.0166327  | 2.00E-10   | 1.31E-09   | 0.9     | 0.9     | 147.89  | 13.38   | HPSP1        | HPSP1 (72kDa protein)                                                                                                  | chr1  | protein_coding       |
| ENSG00000198162.11 | 2.39905902 | 3.57766831 | 1.96E-14   | 2.94E-13   | 0.3     | 0.42    | 2.16    | 2.82    | MAN1A2       | mannosidase, alpha class 1A, member 2                                                                                  | chr1  | protein_coding       |
| ENSG0000027631.1   | 2.6856927  | 0.5261302  | 1.54E-10   | 1.50E-09   | 0.03    | 0.06    | 0.31    | 0.46    | RP11-359E3-- | ...                                                                                                                    | chr1  | antisense            |
| ENSG00000171789.1  | 1.9148957  | 2.886879   | 0.0001614  | 0.00030959 | 0.56    | 4.6     | 1.54    | 2.22    | ANKRD2       | ankyrin repeat family A (RFXANK-like), 2                                                                               | chr5  | protein_coding       |
| ENSG00000166263.12 | 4.4601438  | 0.1256314  | 6.12E-15   | 9.74E-14   | 0.01    | 0       | 0.12    | 0.08    | STXBPA       | syntaxin binding protein 4                                                                                             | chr17 | protein_coding       |
| ENSG0000013263.14  | 2.8125874  | 3.38980257 | 2.72E-18   | 5.74E-17   | 1.03    | 0.82    | 0.9     | 7.76    | REF2         | refectin accessory protein 2                                                                                           | chr1  | protein_coding       |
| ENSG00000103212.12 | 4.05281879 | 1.45293984 | 3.90E-46   | 3.00E-38   | 0.45    | 0.22    | 0.1     | 0.29    | ELTV         | ectodermless variant 1                                                                                                 | chr1  | protein_coding       |
| ENSG0000018263.12  | 2.62578    | 2.6445964  | 0.0052196  | 0.01522223 | 0.02    | 0.01    | 0       | 0       | FIGN         | figetin                                                                                                                | chr1  | protein_coding       |
| ENSG00000125434.9  | 1.2938007  | 2.849439   | 1.29E-05   | 0.00033936 | 25.37   | 25.33   | 1463    | 15.86   | LSM1         | LSM1, U6 small nuclear RNA associated                                                                                  | chr8  | protein_coding       |
| ENSG00000162913.9  | 1.1440536  | 1.5146779  | 0.0020374  | 0.0303863  | 0.3     | 0.51    | 0       | 0.37    | C1orf45      | chromosome 1 open reading frame 145                                                                                    | chr1  | protein_coding       |
| ENSG0000027702.11  | 1.2329154  | 0.632739   | 0.00010345 | 0.029499   | 0.83    | 0.47    | 2.67    | 1.49    | RP11-44N22-- | ...                                                                                                                    | chr1  | processed_transcript |
| ENSG00000166564.12 | 2.5649071  | 0.0166327  | 9.73E-05   | 0.00061818 | 0.04    | 0.07    | 0.26    | 0.33    | CCN1         | zinc finger, C2HC-type containing 1A                                                                                   | chr9  | protein_coding       |
| ENSG00000102587.12 | 1.50455234 | 0.00587526 | 1.28E-06   | 7.22E-06   | 1534.18 | 3064.91 | 9104.66 | 6958.95 | NP-ATP8      | mitochondrially encoded ATP synthase 8                                                                                 | chrM  | protein_coding       |
| ENSG00000182580.2  | 2.9231967  | 1.1639002  | 4.46E-14   | 6.45E-13   | 0.06    | 0.13    | 0.91    | 1.02    | EPH3         | Eph receptor B3                                                                                                        | chr1  | protein_coding       |
| ENSG00000128708.11 | 1.034452   | 2.8862943  | 2.00E-10   | 1.31E-09   | 0.9     | 0.9     | 147.89  | 13.38   | HPSP1        | HPSP1 (72kDa protein)                                                                                                  | chr1  | protein_coding       |
| ENSG00000162881.1  | 5.5046016  | 2.38012583 | 6.11E-37   | 3.89E-35   | 0       | 0       | 0.09    | 0.13    | KNK1071      | KNK1, opposite strand/antisense transcript 1 (non-protein coding)                                                      | chr11 | antisense            |
| ENSG00000199194.5  | 1.0459956  | 9.45244001 | 0.0027832  | 0.0101954  | 67.01   | 75.22   | 183.79  | 206.98  | SD2          | SD2 (delta-9-desaturase)                                                                                               | chr10 | protein_coding       |
| ENSG00000192341.1  | 1.9869703  | 0.7901529  | 0.0333023  | 0.0434343  | 0.4     | 0.19    | 0.5     | 0.36    | AROD3-AS1    | AROD3 antisense RNA 1                                                                                                  | chr1  | protein_coding       |
| ENSG00000163129.2  | 2.0843976  | 0.1035679  | 1.24E-06   | 7.02E-06   | 0.04    | 0.13    | 0.4     | 0.56    | HELO         | helix, POLQ-like                                                                                                       | chr1  | protein_coding       |
| ENSG00000163521.14 | 1.0459956  | 2.7201128  | 0.0060735  | 0.0203939  | 2.23    | 2.92    | 0.3     | 1.45    | GLB1         | galactosylase, beta 1-like                                                                                             | chr2  | protein_coding       |
| ENSG00000147863.10 | 1.0459956  | 2.7201128  | 0.0060735  | 0.0203939  | 2.23    | 2.92    | 0.3     | 1.45    | GLB1         | galactosylase, beta 1-like                                                                                             | chr2  | protein_coding       |
| ENSG00000138967.11 | 4.8079387  | 3.2306674  | 0.00189873 | 0.04519567 | 0.01    | 0.03    | 0       | 0       | ACVRL1       | activin A receptor type II-like 1                                                                                      | chr12 | protein_coding       |
| ENSG00000101505.5  | 1.0459956  | 2.7201128  | 0.0060735  | 0.0203939  | 2.23    | 2.92    | 0.3     | 1.45    | GLB1         | galactosylase, beta 1-like                                                                                             | chr2  | protein_coding       |
| ENSG00000128340.13 | 4.6158336  | 1.9252317  | 2.62E-06   | 1.42E-05   | 0.26    | 0.07    | 0.02    | 0       | RAC2         | ras-related G3 botulinum toxin substrate 2 (rho family, small GTP binding protein Rac2)                                | chr22 | protein_coding       |
| ENSG00000174920.8  | 3.3469108  | 0.4070533  | 1.98E-11   | 2.15E-10   | 0.1     | 0.05    | 0.86    | 1.18    | RND1         | Rho family GTPase 1                                                                                                    | chr12 | protein_coding       |
| ENSG00000197038.4  | 1.0529475  | 1.0459956  | 2.7201128  | 0.0060735  | 2.23    | 2.92    | 0.3     | 1.45    | GLB1         | galactosylase, beta 1-like                                                                                             | chr2  | protein_coding       |
| ENSG00000149909.9  | 1.0459956  | 2.7201128  | 0.0060735  | 0.0203939  | 2.23    | 2.92    | 0.3     | 1.45    | GLB1         | galactosylase, beta 1-like                                                                                             | chr2  | protein_coding       |
| ENSG0000023194.1   | 5.8924048  | 2.8371288  | 0.00026535 | 0.0009747  | 0.34    | 0.16    | 0       | 0       | RP11-31343-3 | ...                                                                                                                    | chr1  | antisense            |
| ENSG00000133441.14 | 3.5454022  | 2.1966889  | 1.98E      |            |         |         |         |         |              |                                                                                                                        |       |                      |

|                    |            |            |            |            |          |        |        |       |            |                                                                                       |       |                      |
|--------------------|------------|------------|------------|------------|----------|--------|--------|-------|------------|---------------------------------------------------------------------------------------|-------|----------------------|
| ENSG0000013953.15  | 1331684    | 1.06768314 | 0.00016048 | 0.00061731 | 0.09     | 0.1    | 0.17   | 0.46  | XPC4       | exportin 4                                                                            | chr13 | protein_coding       |
| ENSG0000013538.17  | -4574104   | 4.2671864  | 0.00000000 | 0.00000000 | 0.01     | 0.07   | 0.01   | 1.07  | DNAH10     | discs, large homolog 4 (Drosophila)                                                   | chr17 | protein_coding       |
| ENSG0000018577.14  | -8809534   | 3.99858158 | 1.01E-11   | 4.40E-69   | 7.04     | 6.16   | 0      | 0.03  | C6orf223   | chromosome 6 open reading frame 223                                                   | chr6  | protein_coding       |
| ENSG0000016644.11  | -1.9863444 | 9.7074936  | 1.58E-11   | 1.73E-10   | 190.17   | 149.36 | 58.33  | 56.12 | RPL27A     | ribosomal protein L27a                                                                | chr11 | protein_coding       |
| ENSG0000018507.15  | 1.8629623  | 1.4357635  | 3.60335447 | 1.01E-16   | 8.98E-15 | 0.48   | 0.48   | 0.37  | HBP2       | hsp70-binding protein 2                                                               | chr2  | protein_coding       |
| ENSG0000012737.11  | 1.38593297 | 0.00989383 | 0.02503712 | 0.03       | 0.03     | 0.1    | 0.12   | 0.12  | CTD-228P1  | --                                                                                    | chr1  | antisense            |
| ENSG00000254788.5  | 2.18513157 | -1.4561386 | 0.00061439 | 0.00211279 | 0.02     | 0.11   | 0.44   | 0.4   | CKLF-CDMTM | CKLF-CDMTM readthrough                                                                | chr16 | protein_coding       |
| ENSG0000016734.12  | 6.3623166  | 3.9587691  | 4.04E-55   | 7.70E-53   | 0.03     | 0.37   | 23.15  | 1.61  | DNTPB2     | de novo nucleotide transferase, terminal, interacting protein 2                       | chr12 | protein_coding       |
| ENSG0000013375.8   | 1.8629623  | 1.4357635  | 8.23E-08   | 5.68E-07   | 0.19     | 0.23   | 0.66   | 1.38  | CAPP7      | calpain 7                                                                             | chr12 | protein_coding       |
| ENSG0000025675.5   | 1.55236896 | 1.3726916  | 8.42E-05   | 0.0004174  | 0.1      | 0.18   | 0.13   | 1.8   | ILK1       | integrin-like kinase 1                                                                | chr9  | protein_coding       |
| ENSG00000076010.13 | -1.8539481 | 5.8938278  | 3.22E-10   | 3.01E-09   | 18.21    | 18.18  | 6.93   | 6.47  | GBA2       | glucosylase, beta feta acid 2                                                         | chr9  | protein_coding       |
| ENSG0000016174.10  | -2.2512212 | 3.9782907  | 3.65E-07   | 0.00000000 | 72.73    | 72.13  | 20.22  | 20.62 | PLCGB3     | phospholipase C, beta 3                                                               | chr17 | protein_coding       |
| ENSG00000181619.11 | 1.2423803  | -0.482905  | 0.00634804 | 0.0177626  | 0.02     | 0.12   | 0.19   | 0.23  | GRP135     | G protein-coupled receptor 135                                                        | chr14 | protein_coding       |
| ENSG00000198067.7  | 2.28173045 | 0.48633568 | 1.62E-08   | 1.20E-07   | 0.03     | 0.1    | 0.44   | 0.43  | CD2AP      | CD2-associated protein                                                                | chr6  | protein_coding       |
| ENSG0000019996.12  | -1.3673335 | 9.74086104 | 1.26E-05   | 2.39E-05   | 5.48     | 6.5    | 3.17   | 3.02  | STB16      | zinc finger and BTB domain containing 16                                              | chr11 | protein_coding       |
| ENSG00000279594.1  | 5.36404116 | -2.8022277 | 0.02905622 | 0.00856312 | 0        | 0      | 0.18   | 0.03  | RP11-950C1 | --                                                                                    | chr14 | TEC                  |
| ENSG00000008830.10 | -1.2980563 | 4.64001754 | 9.45E-06   | 4.61E-05   | 6.07     | 5.68   | 3.4    | 2.97  | POMT2      | protein-O-mannosyltransferase 2                                                       | chr14 | protein_coding       |
| ENSG0000025426.9   | -2.197335  | 1.98055537 | 1.07E-11   | 2.96E-10   | 3.33     | 2.08   | 0.6    | 0.97  | KRT81      | keratin 81, type 2                                                                    | chr12 | protein_coding       |
| ENSG00000197647.10 | -6.9339742 | -1.8836908 | 8.18E-08   | 5.55E-07   | 0.19     | 0.12   | 0.1    | 0     | ZNF433     | zinc finger protein 433                                                               | chr19 | protein_coding       |
| ENSG00000141232.4  | 2.24980024 | 4.71796022 | 1.17E-13   | 1.62E-12   | 2.76     | 3.11   | 7.61   | 19.63 | TBR1       | transducer of ERBB2, 1                                                                | chr17 | protein_coding       |
| ENSG00000167653.4  | 4.9418235  | 9.92541176 | 1.10E-42   | 9.95E-41   | 31.93    | 31.77  | 100.33 | 90.39 | PSCA       | prostate stem cell antigen                                                            | chr8  | protein_coding       |
| ENSG00000235560.3  | -1.1202169 | 1.66373092 | 0.00050856 | 0.00177434 | 2.08     | 1.72   | 1.73   | 0.06  | CTD-203P2  | --                                                                                    | chr16 | antisense            |
| ENSG00000249196.16 | 1.8143929  | 5.57602767 | 2.26E-12   | 2.15E-09   | 21.01    | 19.4   | 7.06   | 6.93  | TGDC       | TOX high mobility group box family member 2                                           | chr20 | protein_coding       |
| ENSG00000277423.1  | 2.9596882  | -2.0731952 | 0.0014075  | 0.00467247 | 0        | 0.14   | 0.62   | 0.92  | RP11-173P1 | --                                                                                    | chr16 | protein_coding       |
| ENSG00000088954.4  | -2.416431  | -1.3457308 | 2.93E-05   | 0.00013052 | 0.84     | 0.6    | 0.1    | 0.25  | PAGE1      | P antigen family member 1 (prostate associated)                                       | chr17 | protein_coding       |
| ENSG00000147889.15 | 1.5913636  | 9.2360303  | 4.38E-06   | 3.07E-07   | 239.55   | 251.66 | 112.59 | 85.25 | CNDNA      | cyclic-dependent kinase inhibitor 2A                                                  | chr9  | protein_coding       |
| ENSG00000131747.13 | 2.28006451 | 5.3488427  | 3.25E-14   | 4.77E-13   | 1.78     | 2.12   | 9.39   | 16.03 | TOP2A      | topoisomerase (DNA) II alpha 170kDa                                                   | chr17 | protein_coding       |
| ENSG0000016929.12  | 1.07076168 | 1.28331543 | 0.00299627 | 0.00881199 | 0.42     | 0.32   | 0.77   | 1.22  | FGM2       | phosphoglucomutase 2                                                                  | chr4  | protein_coding       |
| ENSG0000054218.10  | 6.9869844  | -1.658032  | 3.05E-08   | 2.18E-07   | 0        | 0.13   | 1.75   | 0.13  | LY75       | glycosylase antigen 75                                                                | chr2  | protein_coding       |
| ENSG00000278989.1  | -5.5276337 | -2.8606046 | 0.0018008  | 0.0049521  | 0        | 0.12   | 0      | 0     | RP11-762L8 | --                                                                                    | chr11 | TEC                  |
| ENSG00000254358.1  | 3.99971871 | -2.0224751 | 3.06E-05   | 0.00013563 | 0        | 0.01   | 0.19   | 0.11  | RP11-466F5 | --                                                                                    | chr1  | antisense            |
| ENSG0000017189.11  | 1.1587181  | 2.8803892  | 0.0002562  | 0.00059219 | 0.47     | 0.48   | 1.11   | 1.61  | SPRMA3     | ribosomal protein S6 kinase, 90kDa, polypeptide 3                                     | chr2  | protein_coding       |
| ENSG00000153823.17 | -1.9625894 | 3.51612542 | 1.37E-10   | 1.34E-09   | 5.16     | 4.91   | 1.46   | 1.99  | PDI        | phospholipase transfer domain containing 1, pseudogene                                | chr1  | protein_coding       |
| ENSG00000219067.7  | -2.072323  | -2.551704  | 0.00081266 | 0.00282882 | 0.23     | 0.23   | 0.14   | 0.02  | FAM228P    | family with sequence similarity 228, member B                                         | chr16 | protein_coding       |
| ENSG0000025940.2   | -2.5797546 | -2.038771  | 0.0006978  | 0.00209711 | 0.02     | 0.06   | 0.27   | 0.06  | CTD-302P2  | --                                                                                    | chr16 | antisense            |
| ENSG00000152223.11 | 1.0050855  | 2.661707   | 0.0016814  | 0.00347011 | 0.25     | 0.28   | 0.72   | 0.7   | EPGS       | ectopic P-granules autophagy protein 5 homolog (C. elegans)                           | chr18 | protein_coding       |
| ENSG00000178542.5  | 2.2824910  | 7.7852764  | 1.61E-15   | 2.04E-14   | 2.4      | 2.4    | 1.2    | 1.65  | SEPRIN9    | serpin peptidase inhibitor 5A, member 9 (ovalbumin), member 9                         | chr6  | protein_coding       |
| ENSG00000139674.5  | -6.4909185 | 3.35560292 | 1.42E-04   | 1.39E-43   | 3.55     | 3.91   | 0.11   | 0.11  | STR1       | somatostatin receptor 1                                                               | chr10 | protein_coding       |
| ENSG00000154493.16 | -1.9062571 | -1.3979174 | 0.0014233  | 0.00439562 | 0.11     | 0.11   | 0.06   | 0.01  | CLORF9     | chromosome 10 open reading frame 90                                                   | chr14 | protein_coding       |
| ENSG00000168237.16 | 1.27278326 | 1.3983262  | 1.33E-07   | 2.06E-06   | 1.42     | 1.62   | 0.19   | 0.63  | GLYCK7     | glycylglycyl transferase 7                                                            | chr3  | protein_coding       |
| ENSG00000278644.2  | -3.1758553 | -2.0664402 | 0.0161562  | 0.0399186  | 0.15     | 0.19   | 0      | 0.04  | HCG17      | HML complex group 17 (non-protein-coding)                                             | chr6  | lncRNA               |
| ENSG00000281033.4  | 5.7738545  | -2.5463609 | 0.0026535  | 0.00309747 | 0        | 0      | 0.04   | 0.7   | FAM181B    | family with sequence similarity 181, member B                                         | chr11 | protein_coding       |
| ENSG00000121414.13 | 4.4622845  | 0.40424925 | 0.0018285  | 0.0008922  | 0.09     | 0.04   | 0.03   | 0.38  | CPRL26     | chromosome 16 open reading frame 26                                                   | chr11 | protein_coding       |
| ENSG00000186577.10 | -1.2063248 | 3.6023315  | 5.31E-05   | 0.00022541 | 10.41    | 7.23   | 0.64   | 4.13  | C6orf1     | chromosome 6 open reading frame 1                                                     | chr6  | protein_coding       |
| ENSG00000185950.8  | -2.0269318 | 4.98979342 | 1.22E-11   | 1.35E-10   | 1.49     | 1.57   | 1.35   | 1.98  | RSK3       | ribulin receptor substrate 2                                                          | chr13 | protein_coding       |
| ENSG00000186496.11 | 0.0009826  | 0.0009826  | 0.0009826  | 0.0009826  | 0.75     | 0.75   | 0.08   | 2.32  | PDZDC2P    | pyridoxal-dependent decarboxylase domain containing 2, pseudogene                     | chr13 | processed_transcript |
| ENSG00000215915.8  | -1.8875184 | -0.0492325 | 9.82E-06   | 4.77E-05   | 0.34     | 0.27   | 0.15   | 0.08  | ATA3C      | ATPase family, AAA domain containing 3C                                               | chr19 | protein_coding       |
| ENSG00000173432.9  | 1.6546     | 5.643      | 3.76E-07   | 3.76E-06   | 1.64     | 1.64   | 0.03   | 1.65  | GAL3       | galactose 3-epimerase                                                                 | chr11 | protein_coding       |
| ENSG0000017275.15  | 1.2925496  | 3.76601287 | 7.75E-06   | 3.85E-05   | 25.25    | 26.92  | 81.18  | 89.23 | FAM132A    | family with sequence similarity 132, member A                                         | chr16 | protein_coding       |
| ENSG00000255153.1  | 2.2428903  | 0.2880184  | 8.03E-08   | 5.47E-07   | 0.37     | 0.3    | 0.29   | 1.91  | TOLLIP-AS1 | TOLLIP antisense RNA 1 (head to head)                                                 | chr11 | antisense            |
| ENSG0000017025.3   | 8.3404453  | 1.56E-14   | 1.33E-15   | 5.6E-14    | 0        | 0      | 0      | 1.31  | CTD183     | chromosome 18 open reading frame 18                                                   | chr11 | protein_coding       |
| ENSG0000007502.16  | 1.38693951 | 1.81067149 | 2.44E-05   | 0.00010504 | 0.31     | 0.3    | 0.57   | 1.56  | ERGIC2     | ERGIC and colic 2                                                                     | chr12 | protein_coding       |
| ENSG00000108622.9  | -0.6017817 | 2.01330648 | 1.50E-45   | 1.58E-43   | 4.55     | 3.96   | 0.06   | 0     | ICAM2      | intercellular adhesion molecule 2                                                     | chr17 | protein_coding       |
| ENSG00000138363.13 | 1.1978411  | 2.1057144  | 0.0000000  | 0.0000000  | 42.32    | 44.51  | 4.01   | 44.51 | ATC1       | 5-aminolevulinic acid-carboxamide ribonucleotide formyltransferase/IMP cyclohydrolase | chr17 | protein_coding       |
| ENSG00000162714.11 | -1.1442871 | 1.62605285 | 7.04E-07   | 4.15E-06   | 17.44    | 16.57  | 8.34   | 8.3   | ZNF496     | zinc finger protein 496                                                               | chr1  | protein_coding       |
| ENSG00000282720.1  | -1.3744002 | 1.5839893  | 2.81E-05   | 0.00012546 | 1.74     | 1.84   | 0.83   | 1.01  | CTD-524C3  | --                                                                                    | chr17 | antisense            |
| ENSG00000179543.13 | 2.6151491  | -2.6387997 | 0.0003315  | 0.00059219 | 0.02     | 0.04   | 0.03   | 0.03  | SCSD       | scavenger receptor cysteine rich family, 5 domains                                    | chr19 | protein_coding       |
| ENSG00000163410.10 | -1.278178  | 1.31565714 | 0.00013065 | 0.00051368 | 0.87     | 0.6    | 0.27   | 0.54  | SH2DS5     | SH2 domain containing 5                                                               | chr1  | protein_coding       |
| ENSG0000024307.6   | 2.8278895  | 1.21231025 | 0.000111   | 0.000111   | 0.02     | 0.02   | 0.03   | 0.15  | HALLS3     | HALLS3/haemagglutinin-like complex, subunit 3                                         | chr10 | protein_coding       |
| ENSG00000075891.20 | 8.6880676  | -0.1883369 | 1.90E-18   | 4.07E-17   | 0        | 0      | 0      | 0.39  | PAC2       | paired box 2                                                                          | chr10 | protein_coding       |
| ENSG00000113657.11 | -6.5221543 | 4.18269106 | 4.61E-54   | 8.13E-52   | 4.84     | 5      | 0.11   | 0.11  | DYPSL3     | dihydropyrimidinase-like 3                                                            | chr15 | protein_coding       |
| ENSG0000014738.12  | 1.5714232  | 1.5714232  | 1.43E-05   | 2.91E-05   | 0.49     | 0.49   | 0.04   | 7.66  | GRB7       | growth factor receptor-bound protein 7                                                | chr10 | protein_coding       |
| ENSG00000126091.18 | -1.3571465 | 3.4101395  | 6.58E-06   | 3.30E-05   | 5.09     | 4.48   | 2.77   | 2.37  | STGAL3     | ST3 beta-galactosidase alpha-2,3-sialyltransferase 3                                  | chr11 | protein_coding       |
| ENSG00000140945.14 | -2.1901671 | 6.14977371 | 1.92E-13   | 2.59E-12   | 9.62     | 9.83   | 2.38   | 3.22  | CDH13      | cadherin 13                                                                           | chr16 | protein_coding       |
| ENSG00000185269.10 | 1.1086202  | 3.1717938  | 4.88E-06   | 6.23E-05   | 11.25    | 11.25  | 0.03   | 0.36  | NOTUM      | protein pectinacetyltransferase homolog (Drosophila)                                  | chr16 | protein_coding       |
| ENSG00000268951.2  | 4.87917439 | -3.0678699 | 0.0189743  | 0.00419557 | 0        | 0      | 0      | 0.36  | AD000912.1 | --                                                                                    | chr19 | lncRNA               |
| ENSG00000270717.1  | 4.1047632  | -1.2454106 | 9.32E-08   | 6.27E-07   | 0        | 0.03   | 0.43   | 0.29  | RP11-348P1 | --                                                                                    | chr19 | lncRNA               |
| ENSG00000125317.9  | 3.3963624  | 2.7094767  | 2.13E-05   | 9.81E-05   | 0.10     | 0.05   | 0.03   | 0.35  | PF4A1      | pseudopodium-enriched atypical kinase 1                                               | chr15 | protein_coding       |
| ENSG00000385307.7  | 7.31156115 | -1.3924071 | 4.49E-10   | 4.11E-09   | 0        | 0      | 0.26   | 0.31  | CYP46A1    | cytochrome P450, family 4, subfamily A, polypeptide 1                                 | chr14 | protein_coding       |
| ENSG0000021931.4   | -6.6539187 | -0.162226  | 5.55E-12   | 1.91E-19   | 0.21     | 0.01   | 0.03   | 0.01  | IRIF1      | ligand dependent nuclear receptor interacting factor 1                                | chr1  | protein_coding       |
| ENSG0000015461.18  | 1.8444273  | 3.168796   | 3.48E-07   | 3.16E-06   | 0.76     | 0.76   | 0.26   | 3.24  | UPF2       | UPF2 regulator of nonsense transcripts homolog (yeast)                                | chr10 | protein_coding       |
| ENSG00000174007.7  | 2.83693372 | 1.34638324 | 2.99E-14   | 4.41E-13   | 0.21     | 0.23   | 1.63   | 2.57  | CEP19      | centrosomal protein 19kDa                                                             | chr19 | protein_coding       |
| ENSG00000189645.15 | 1.8201075  | 4.4947895  | 1.90E-05   | 3.08E-08   | 4.49     | 4.49   | 0.04   | 0.94  | TEAAB      | TEA domain containing protein A/B-like 8                                              | chr1  | protein_coding       |
| ENSG0000026878.1   | 2.24911714 | -2.5414026 | 0.01923175 | 0.0458365  | 0.21     | 0.23   | 1.03   | 1.96  | SNORA51    | small nucleolar RNA, H/ACA box 51                                                     | chr18 | snoRNA               |
| ENSG00000254815.4  | 2.46189393 | -1.4675292 | 0.0025672  | 0.00059219 | 0.21     | 0.23   | 1.03   | 0.28  | RP11-496B1 | --                                                                                    | chr11 | antisense            |
| ENSG00000176225.11 | 1.1336312  | 2.34158392 | 0.0000000  | 0.0000000  | 0.73     | 0.73   | 0.03   | 0.64  | RTTN       | reticulon                                                                             | chr19 | protein_coding       |
| ENSG00000257183.1  | -1.0738288 | 5.17031444 | 0.00021426 | 0.00080555 | 20.03    | 21.21  | 12.57  | 13.54 | LENG9      | leukocyte receptor cluster (LRC) member 9                                             | chr11 | protein_coding       |
| ENSG00000149537.7  | 5.29735717 | 1.17142887 | 1.02E-26   | 3.97E-25   | 0.02     | 0.04   | 0.05   | 1.76  | MP212      | myelin protein zero-like 2                                                            | chr11 | protein_coding       |
| ENSG00000169666.17 | 0.00019819 | 0.00019819 | 0.00019819 | 0.00019819 | 0.05     | 0.07   | 0.03   | 3.09  | CNBR1      | cellular nucleotide binding protein (G protein), beta 5                               | chr11 | protein_coding       |
| ENSG00000278309.1  | -4.3760883 | 3.81488629 | 5.16E-36   | 3.21E-34   | 4.08     | 3.2    | 0.33   | 0.1   | RP11-102K1 | --                                                                                    |       |                      |

|                       |             |            |            |             |        |        |       |        |                                   |                                                                       |                |                      |
|-----------------------|-------------|------------|------------|-------------|--------|--------|-------|--------|-----------------------------------|-----------------------------------------------------------------------|----------------|----------------------|
| ENSG0000017157.14     | 5.45007274  | -2.7494288 | 000495621  | 0           | 0      | 0.033  | 0.113 | LRRC34 | leucine rich repeat containing 34 | chr3                                                                  | protein_coding |                      |
| ENSG00000083565       | 1.57454955  | 2.0683464  | 11356      | 1.352       | 0.10   | 15.9   | 87.11 | 0.11   | p53 and DNA-damage regulated 1    | chr3                                                                  | protein_coding |                      |
| ENSG00000149880.10    | -8.4767682  | 579880.16  | 8756.87    | 8.39E-84    | 40.67  | 36.22  | 0.14  | 0.14   | PAH43                             | prolyl 4-hydroxylase, alpha polypeptide III                           | chr11          | protein_coding       |
| ENSG00000134864.9     | -2.1186201  | 9.5244857  | 7762.13    | 9.84E-12    | 299.16 | 299.58 | 89.01 | 89.54  | VARS                              | tyrosyl-L-tyrosine synthase                                           | chr1           | protein_coding       |
| ENSG00000172712.1     | -0.0488238  | 6.8085455  | 0.002899   | 0.00100864  | 13.85  | 13.85  | 0.00  | 0.00   | MDXAP                             | X-irradiation protein                                                 | chr12          | protein_coding       |
| ENSG00000179428.2     | -5.9983854  | -2.9693515 | 0.00014482 | 0.00057423  | 0.22   | 0.06   | 0     | 0      | AC0730725                         | transcript                                                            | chr7           | antisense            |
| ENSG00000105821.3     | 2.60619134  | 3.1073593  | 5.12E-16   | 8.92E-15    | 0.24   | 0.04   | 1.92  | 5.23   | DNAIC2                            | DnaI (Hsp40) homolog, subfamily C, member 2                           | chr7           | protein_coding       |
| ENSG00000171614.1     | -1.1467454  | 0.0014718  | 0.0001708  | 0.00020708  | 0.04   | 0.04   | 0.09  | 0.09   | UNC00386                          | long intergenic non-protein coding RNA 586                            | chr12          | lincRNA              |
| ENSG00000153525.12    | -1.17931667 | 4.1460372  | 2.28E-09   | 1.91E-08    | 7.83   | 8.63   | 3.4   | 2.91   | DOK1                              | docking protein 1, G2bDa (downstream of tyrosine kinase 1)            | chr7           | protein_coding       |
| ENSG00000105827.12    | 3.597320    | 0.5476857  | 4.00E-15   | 6.46E-14    | 0.04   | 0.04   | 0.51  | 0.43   | CAD17                             | DBP1 and CUL4 associated factor 17                                    | chr1           | protein_coding       |
| ENSG00000176784.14    | -2.9562095  | 0.0002254  | 5.34E-72   | 0.0002254   | 0.04   | 0.04   | 0.14  | 0.14   | AC048672                          | adenosine deaminase, RNA-specific (non-functional)                    | chr5           | antisense            |
| ENSG00000267121.1     | 1.0449567   | 1.08334761 | 0.0021959  | 0.00814315  | 0.45   | 0.65   | 1.28  | 1.76   | RP11-295D4                        | transcript                                                            | chr16          | sense_intronic       |
| ENSG00000108725.6     | 1.2964954   | 2.0015939  | 5.44E-10   | 0.00020268  | 0.63   | 0.64   | 1.11  | 3.07   | SNM15                             | small integral membrane protein 15                                    | chr5           | protein_coding       |
| ENSG00000201431.1     | -2.7573045  | -1.2535356 | 4.95E-06   | 2.55E-05    | 0.26   | 0.32   | 0.05  | 0.06   | GQVQW1                            | GVQW motif containing 1                                               | chr2           | protein_coding       |
| ENSG00000125945.3     | 1.0870107   | 2.59061307 | 0.00042969 | 0.00152217  | 0.61   | 0.79   | 1.64  | 2.34   | ZNF436                            | zinc finger protein 436                                               | chr1           | protein_coding       |
| ENSG00000126089.9     | 1.57454955  | 2.0683464  | 11356      | 1.352       | 0.10   | 15.9   | 87.11 | 0.11   | MDM1                              | p15-inhibitor of Rb1 interaction                                      | chr2           | protein_coding       |
| ENSG00000104043.3     | 7.52281736  | -1.2094832 | 3.23E-11   | 3.41E-10    | 0      | 0      | 0.07  | 0.19   | ATPB84                            | ATPase, class I, type 8B, member 4                                    | chr15          | protein_coding       |
| ENSG00000202057.1     | -9.4869357  | 0.4260014  | 3.19E-27   | 1.28E-25    | 1.72   | 2.33   | 0     | 0      | NEF4                              | nuclear factor, erythroid 4                                           | chr7           | antisense            |
| ENSG00000161734.4     | 4.7446734   | 3.1426722  | 8.21E-57   | 1.74E-54    | 13.51  | 13     | 0.09  | 0.1    | CXCL3                             | chemokine (C-X-C motif) ligand 3                                      | chr4           | protein_coding       |
| ENSG00000204588.5     | -1.8031011  | 3.7708096  | 2.49E-09   | 2.07E-08    | 7.3    | 6.78   | 2.63  | 2.75   | UNC01123                          | long intergenic non-protein coding RNA 1123                           | chr2           | lincRNA              |
| ENSG00000116005.10    | 2.01490792  | 5.33099708 | 1.25E-11   | 1.43E-10    | 2.44   | 2.28   | 10.44 | 15.67  | PCYC3                             | phenylethanolamine oxidase 1                                          | chr2           | protein_coding       |
| ENSG00000167260.14    | -5.3526884  | -0.9660265 | 1.11E-15   | 1.98E-14    | 0.49   | 0.43   | 0.03  | 0      | WDNR8                             | WD repeat domain 86                                                   | chr7           | protein_coding       |
| ENSG00000204397.4     | -5.1633981  | 0.6467021  | 1.55E-24   | 5.17E-23    | 1.33   | 1.31   | 1.02  | 0.07   | UNC01272                          | long intergenic non-protein coding RNA 1272                           | chr20          | lincRNA              |
| ENSG00000128883.2     | 3.2660551   | 1.1554681  | 3.41E-16   | 6.02E-15    | 0.16   | 0.06   | 1.03  | 1.06   | GAD1                              | glutamate decarboxylase 1 (brain, 67kDa)                              | chr2           | protein_coding       |
| ENSG00000182864.4     | 1.2809342   | 5.3366628  | 8.75E-06   | 4.73E-05    | 1.16   | 0.92   | 3.05  | 31.72  | TG02                              | transducer of ERBB2, 2                                                | chr2           | protein_coding       |
| ENSG00000201495.1     | 5.3294093   | -2.821228  | 0.00290522 | 0.00856312  | 0      | 0      | 0.21  | 0.79   | RP4-535B20                        | transcript                                                            | chr2           | lincRNA              |
| ENSG00000202164.1     | 4.9616816   | -0.0277626 | 1.25E-16   | 2.30E-15    | 0.02   | 0.03   | 0.04  | 1.44   | AC026693                          | transcript                                                            | chr2           | lincRNA              |
| ENSG00000205856.2     | 2.24810695  | -2.5410053 | 0.01923175 | 0.0458365   | 0      | 0.07   | 0.16  | 0.3    | RP11-87C12                        | transcript                                                            | chr12          | lincRNA              |
| ENSG00000205920.1     | -1.7978245  | -0.9898937 | 1.13E-13   | 1.56E-12    | 1.11   | 0.65   | 0     | 0      | RP11-297J1                        | transcript                                                            | chr2           | lincRNA              |
| ENSG00000156883.14    | 1.566738    | 6.8696373  | 0.0024077  | 0.0089826   | 28.37  | 27.43  | 17.54 | 16.76  | BRP1                              | brionomycin and PHD finger containing, 1                              | chr2           | protein_coding       |
| ENSG00000238843.3     | 3.9923335   | -2.0276299 | 3.06E-05   | 0.00013563  | 0.01   | 0.11   | 0.11  | 0.11   | RMDN2-AS1                         | RMDN2 antisense RNA 1                                                 | chr2           | antisense            |
| ENSG00000173087.7     | -1.9426462  | 6.5986856  | 4.48E-11   | 4.67E-10    | 46.31  | 43.89  | 14.96 | 16.34  | TMEM261                           | transmembrane protein 261                                             | chr2           | protein_coding       |
| ENSG00000189624.14    | 2.9687691   | -0.0328438 | 2.89E-12   | 2.39E-10    | 0.1    | 0.05   | 1.36  | 0.29   | GALNT6                            | polypeptide N-acetylglucosaminyltransferase 6                         | chr2           | protein_coding       |
| ENSG000001140045      | 2.80484667  | -1.481136  | 6.51E-05   | 0.00027249  | 0.04   | 0      | 0.27  | 0.15   | NRROS                             | negative regulator of reactive oxygen species                         | chr2           | protein_coding       |
| ENSG00000207600.1     | 2.9643669   | 3.385862   | 0.003366   | 0.0331641   | 0.12   | 0.12   | 0.08  | 0.11   | RP11-60C22                        | transcript                                                            | chr15          | lincRNA              |
| ENSG00000179185.1     | 3.0244969   | -2.6868137 | 0.0943894  | 0.0246891   | 0      | 0      | 0.01  | 0      | CTA-925C3                         | transcript                                                            | chr12          | sense_intronic       |
| ENSG00000201584.12    | -1.2260198  | 5.4647315  | 2.44E-05   | 0.000101039 | 15.66  | 13.28  | 8.77  | 7.71   | SLC48A1                           | solute carrier family 48 (heme transporter), member 1                 | chr12          | protein_coding       |
| ENSG00000174807.16    | 1.9264728   | 0.0002295  | 2.91E-12   | 2.39E-10    | 0.12   | 0.12   | 0.17  | 0.13   | ZCWPV1                            | zinc finger, CW type with zinc finger domain 1                        | chr1           | protein_coding       |
| ENSG00000108876.7     | 5.3772961   | 0.1753143  | 7.59E-23   | 2.24E-21    | 0.02   | 0.02   | 0.58  | 1.33   | ANKRD49                           | ankyrin repeat domain 49                                              | chr11          | protein_coding       |
| ENSG00000162125.1     | -2.546173   | 2.0510705  | 5.06E-14   | 7.28E-13    | 1.98   | 1.51   | 0.49  | 0.31   | RP11-195F11                       | transcript                                                            | chr9           | processed_transcript |
| ENSG00000108811.11    | 2.68744983  | 4.9127     | 0.2        | 2.6E-09     | 0.15   | 0.15   | 0.17  | 0.14   | HNRK3                             | NHL repeat containing 3                                               | chr1           | protein_coding       |
| ENSG00000105310.15    | -1.1313248  | 5.0842228  | 1.11E-92   | 1.56E-89    | 9.89   | 10.4   | 0     | 0      | FTSL4                             | folistatin-like 4                                                     | chr5           | protein_coding       |
| ENSG00000106019.10    | -1.6920666  | 5.3945049  | 8.82E-09   | 6.82E-08    | 22.9   | 22.11  | 9.48  | 9.07   | WR04                              | WD repeat domain 4                                                    | chr21          | protein_coding       |
| ENSG00000149486.12    | 2.8565912   | 0.1422244  | 2.68E-12   | 5.13E-10    | 0.18   | 0.18   | 0.17  | 0.01   | MMAC2                             | high mobility group domain containing 2                               | chr2           | protein_coding       |
| ENSG00000201966.6     | -10.093682  | 5.3041087  | 1.61E-90   | 1.76E-87    | 34.01  | 29.42  | 0.06  | 0.01   | CXCR4                             | chemokine (C-X-C motif) receptor 4                                    | chr2           | protein_coding       |
| ENSG00000204324.1     | -1.537465   | -1.9868187 | 0.00653791 | 0.0177646   | 0.18   | 0.18   | 0.06  | 0.1    | RP5-1157M2                        | transcript                                                            | chr2           | antisense            |
| ENSG00000105133.175.2 | 2.5172838   | 0.2718475  | 7.39E-12   | 8.49E-10    | 0.15   | 0.15   | 0.18  | 0.1    | CTD-202031                        | transcript                                                            | chr17          | antisense            |
| ENSG00000203280.2     | 6.37984316  | -1.244774  | 5.19E-06   | 2.66E-05    | 0      | 0      | 0.36  | 0.57   | MCFL2L-AS1                        | MCFL2 antisense RNA 1                                                 | chr13          | antisense            |
| ENSG00000166736.10    | -9.91512    | -1.2       | 0.0001234  | 0.0001234   | 17.23  | 12.55  | 8.21  | 8.81   | CNBB1P1                           | 5-hydroxytryptamine (serotonin) receptor 3A, ionotropic               | chr14          | protein_coding       |
| ENSG00000108014.16    | -1.224785   | -4.7718874 | 2.74E-05   | 0.0012274   | 17.23  | 12.55  | 8.21  | 8.81   | CNBB1P1                           | cydin II interacting protein 1, E3 ubiquitin protein ligase           | chr14          | protein_coding       |
| ENSG00000143919.13    | -1.0071448  | 1.98661783 | 0.00143604 | 0.00458202  | 1.69   | 1.5    | 0.88  | 1.24   | CAMMOT                            | calmodulin-lysine N-methyltransferase                                 | chr2           | protein_coding       |
| ENSG00000103134.10    | 4.3642661   | 8.31E-15   | 2.1E-13    | 0.1         | 4.68   | 28.62  | 0     | 31.84  | BE3                               | transcript                                                            | chr8           | protein_coding       |
| ENSG00000171033.11    | -3.7886039  | -1.8821375 | 1.61E-05   | 7.52E-05    | 0.04   | 0.13   | 0.02  | 0      | PKA                               | protein kinase (cAMP-dependent, catalytic) inhibitor alpha            | chr2           | protein_coding       |
| ENSG00000074657.12    | -1.416889   | 3.3294794  | 2.44E-06   | 1.33E-15    | 0.38   | 0.17   | 0.57  | 0.99   | ZNF532                            | zinc finger protein 532                                               | chr18          | protein_coding       |
| ENSG00000166966.11    | -1.517381   | 0.7314926  | 1.75E-12   | 1.75E-10    | 13.11  | 11.1   | 0.89  | 60.45  | MMAR                              | methionine RNA synthase                                               | chr2           | protein_coding       |
| ENSG00000207664.1     | -3.3398809  | -2.1622272 | 0.002605   | 0.0096399   | 0.12   | 0.02   | 0.02  | 0.02   | RP5-858L17                        | transcript                                                            | chr2           | antisense            |
| ENSG00000184678.9     | 2.46241452  | 0.1089294  | 1.90E-15   | 3.10E-14    | 1.66   | 2.12   | 14.37 | 13.3   | HIST2H2BE                         | histone cluster 2, H2be                                               | chr1           | protein_coding       |
| ENSG00000105947.13    | 1.8570769   | 0.0003513  | 0.0003111  | 0.00035059  | 50.08  | 49.3   | 0.47  | 32.5   | PKCIB2                            | phosphoinositide-3-kinase, regulatory subunit 2 (beta)                | chr1           | protein_coding       |
| ENSG00000136866.11    | 2.0636654   | 4.7381489  | 7.00E-12   | 7.97E-11    | 3.99   | 3.65   | 21.36 | 21.23  | RHLH36                            | leukine-like family member 36                                         | chr16          | protein_coding       |
| ENSG00000151332.17    | 2.9517919   | 2.7600368  | 8.35E-15   | 1.13E-06    | 1.23   | 0.86   | 1.23  | 0.86   | MB1                               | MB12 binding inhibitory protein 1                                     | chr14          | protein_coding       |
| ENSG00000137076.17    | -1.8173798  | 9.6103683  | 2.33E-10   | 2.22E-09    | 112.71 | 112.22 | 4.932 | 38.65  | TUN1                              | tail domain 1                                                         | chr1           | protein_coding       |
| ENSG00000185127.6     | 1.17974706  | 0.7627243  | 0.0096449  | 0.00317723  | 0.34   | 0.27   | 0.77  | 1.07   | Gor120                            | chromosome 6 open reading frame 120                                   | chr6           | protein_coding       |
| ENSG00000120786.15    | 2.9869153   | 0.0000000  | 2.98E-12   | 2.56E-06    | 0.01   | 0.01   | 0.01  | 0.04   | MRG1                              | nuclear receptor subfamily 2, group C, member 1                       | chr12          | protein_coding       |
| ENSG00000149311.16    | 4.9621207   | 2.0992605  | 2.46E-32   | 1.27E-30    | 0.01   | 0.01   | 0.38  | 0.57   | ATM                               | ATM serine/threonine kinase                                           | chr11          | protein_coding       |
| ENSG00000146476.9     | 3.09087049  | 0.50237261 | 1.22E-12   | 1.52E-11    | 0.08   | 0.09   | 0.43  | 1.52   | Gcor121                           | transcript                                                            | chr6           | protein_coding       |
| ENSG00000105316.10    | 2.48342638  | 5.2529819  | 4.91E-07   | 2.56E-06    | 2.89   | 2.89   | 0.18  | 0.36   | CWC15                             | CWC15 spliceosome-associated protein                                  | chr1           | protein_coding       |
| ENSG00000201582.1     | -1.229445   | 5.3744263  | 2.02E-05   | 9.24E-05    | 10.12  | 76.61  | 50.74 | 49.83  | RP4-6104C1                        | transcript                                                            | chr2           | antisense            |
| ENSG00000114346.12    | 2.8590762   | 2.4478007  | 3.48E-17   | 6.67E-16    | 0.26   | 0.19   | 1.51  | 2.96   | KCT2                              | epithelial cell transforming 2                                        | chr2           | protein_coding       |
| ENSG00000136968.16    | 6.735752    | 0.0000000  | 6.73E-17   | 4.42E-06    | 0.18   | 0.18   | 0.19  | 0.11   | CEB2                              | pregnancy specific beta-1 glycoprotein 9                              | chr19          | protein_coding       |
| ENSG00000106710.1     | 3.5644089   | -1.6623614 | 2.93E-05   | 0.0013031   | 0      | 0.01   | 0.03  | 0.06   | PSD1                              | fibronectin type III and SPRY domain containing 1-like                | chr9           | protein_coding       |
| ENSG00000145174.13    | -1.2036391  | 3.6510662  | 5.31E-05   | 0.00022556  | 1.6    | 1.51   | 0.9   | 0.19   | GRP161                            | G-protein-coupled receptor 161                                        | chr1           | protein_coding       |
| ENSG00000170771.9     | 4.9820659   | -0.611096  | 0.00465    | 0.0258219   | 0.13   | 0.13   | 0.17  | 0.02   | PAOC2                             | lipoic acid hydroxylase domain containing 2                           | chr1           | protein_coding       |
| ENSG00000183044.10    | 5.37731176  | -0.921847  | 6.98E-11   | 7.14E-10    | 0      | 0      | 0.12  | 0.19   | ABAT                              | 4-aminobutyrate aminotransferase                                      | chr16          | protein_coding       |
| ENSG00000109794.12    | 1.01073094  | 0.0000000  | 1.01E-12   | 4.46E-11    | 1.7    | 1.7    | 0     | 0      | FAM149A                           | transcript                                                            | chr4           | antisense            |
| ENSG00000159140.16    | 1.2197071   | 1.79969748 | 2.38E-05   | 0.00010789  | 6.15   | 6.71   | 19.69 | 20.25  | SON                               | SON DNA binding protein                                               | chr21          | protein_coding       |
| ENSG00000168216.9     | 1.25544781  | 1.68477369 | 0.00014387 | 0.00560616  | 0.46   | 0.09   | 1.05  | 2.92   | LMBRD1                            | LMBR1 domain containing 1                                             | chr16          | protein_coding       |
| ENSG00000100311.15    | 2.1299443   | 0.0000000  | 2.89E-19   | 6.3E-18     | 0.15   | 0.15   | 0.18  | 0.25   | CTD19B                            | cyclin-dependent growth factor beta polypeptide                       | chr22          | protein_coding       |
| ENSG00000167077.11    | -7.0314087  | 2.68517788 | 3.40E-15   | 4.85E-49    | 2.68   | 2.43   | 0     | 0.05   | MEI1                              | meiotic inhibitor 1                                                   | chr22          | protein_coding       |
| ENSG00000168243.9     | 1.1228144   | -0.363231  | 0.016849   | 0.0296561   | 0.05   | 0.09   | 0.15  | 0.25   | GN44                              | guanine nucleotide binding protein (G protein), gamma 4               | chr1           | protein_coding       |
| ENSG00000136938.8     | 1.1194508   | 0.0000000  | 1.11E-12   | 2.76E-10    | 337.24 | 227.54 | 0.18  | 248.89 | ANP228                            | basic leucine zipper nuclear transcription factor 32 family, member B | chr1           | protein_coding       |
|                       |             |            |            |             |        |        |       |        |                                   |                                                                       |                |                      |



|                    |            |            |            |            |        |        |        |        |              |                                                                                       |       |                |
|--------------------|------------|------------|------------|------------|--------|--------|--------|--------|--------------|---------------------------------------------------------------------------------------|-------|----------------|
| ENSG00000188452.1  | -6.7478987 | 3.1896739  | 356E-53    | 6.01E-51   | 2.69   | 2.6    | 0.05   | 0.02   | COL3A1       | collagen, type II, alpha 1                                                            | chr2  | protein_coding |
| ENSG00000154320.15 | 1.3804979  | 1.454045   | 7.54E-09   | 1.45E-05   | 0.71   | 0.4    | 0.34   | 0.44   | MA3          | muscle inhibitory activity family, member 3                                           | chr2  | protein_coding |
| ENSG0000008666.17  | 1.7273292  | 4.32951046 | 754E-09    | 5.88E-08   | 3.32   | 3.15   | 10.79  | 1793   | ZFAND6       | zinc finger, AN1-type domain 6                                                        | chr15 | protein_coding |
| ENSG00000261761.1  | 3.34534836 | 1.47613418 | 3.30E-08   | 6.41E-17   | 0.12   | 0.05   | 0.93   | 1.4    | RP11-196G1-- | --                                                                                    | chr1  | sense_intronic |
| ENSG0000137831.13  | 1.4898613  | 2.5741265  | 1.45E-06   | 4.54E-06   | 0.18   | 0.18   | 0.28   | 0.1    | UAC1         | ubiquitin-associated with coiled-coil domains and ankyrin repeats                     | chr15 | protein_coding |
| ENSG00000158066.14 | 1.4736609  | 5.78860968 | 4.43E-07   | 2.70E-06   | 5.43   | 5.39   | 20.75  | 1925   | BAAIP2       | BAL1-associated protein 2                                                             | chr17 | protein_coding |
| ENSG0000059564.12  | 2.1889442  | 2.36779316 | 2.04E-11   | 2.21E-10   | 0.24   | 0.17   | 1.55   | 155    | BTAF1        | BAT1 RNA polymerase II, B-TFIIID transcription factor-associated, 170kDa              | chr10 | protein_coding |
| ENSG0000028424.1   | -1.1380027 | -0.173961  | 0.040067   | 0.0179879  | 0.18   | 0.28   | 0.1    | 0.1    | CTC222-324E  | --                                                                                    | chr3  | TEC            |
| ENSG00000618146.1  | -2.2977849 | 6.00104492 | 1.61E-14   | 2.45E-13   | 14.13  | 13.38  | 3.82   | 3.63   | CCDC1        | CUB domain containing protein 1                                                       | chr3  | protein_coding |
| ENSG0000171218.8   | 2.2371719  | 4.88498434 | 1.45E-13   | 1.97E-12   | 1.26   | 0.66   | 8.61   | 9.71   | CCDC42BP     | CCDC42 binding protein kinase gamma (DMPK-like)                                       | chr11 | protein_coding |
| ENSG00000164813.4  | 5.45604514 | 1.48948314 | 0.0001067  | 2.47E-06   | 1.26   | 0.66   | 8.61   | 7.02   | DNAAF5       | dynactin, axonemal, assembly factor 5                                                 | chr15 | protein_coding |
| ENSG00000154760.12 | -3.1776452 | -2.8656583 | 0.0015662  | 0.0359916  | 0.01   | 0.02   | 0      | 0      | SLFN13       | schlafen family member 13                                                             | chr17 | protein_coding |
| ENSG0000025251.2   | 6.7823207  | -1.8145495 | 2.24E-06   | 4.45E-06   | 0      | 0      | 0.09   | 0      | CTC-53A42.1  | --                                                                                    | chr2  | TEC            |
| ENSG0000019997.9   | 1.1001514  | 7.09634802 | 0.0013291  | 0.00052188 | 60.43  | 65.78  | 42.5   | 35.71  | ZNF768       | zinc finger protein 768                                                               | chr16 | protein_coding |
| ENSG00000189334.7  | -6.0690914 | 3.20863762 | 1.99E-49   | 2.63E-47   | 12.69  | 10.43  | 0.15   | 0.3    | S100A14      | S100 calcium binding protein A14                                                      | chr14 | protein_coding |
| ENSG00000186166.7  | 1.06118071 | 3.2884983  | 0.0004069  | 0.0144247  | 3.29   | 5.14   | 11.01  | 12.42  | CCDC34       | coiled-coil domain containing 34                                                      | chr11 | protein_coding |
| ENSG00000126365.1  | -1.3818611 | 4.51212784 | 2.75E-06   | 1.48E-05   | 9.49   | 9.75   | 5.55   | 4.26   | NR1D1        | nuclear receptor subfamily 1, group D, member 1                                       | chr17 | protein_coding |
| ENSG0000016307.12  | 2.79569914 | 1.84140707 | 2.61E-15   | 4.29E-14   | 0.13   | 0.21   | 0.74   | 2.42   | MAA1524      | KIAA1524                                                                              | chr17 | protein_coding |
| ENSG00000404991.15 | 1.05644413 | 3.59431108 | 0.0038507  | 0.0113753  | 1.16   | 1.04   | 1.01   | 0.41   | KCHD1M1      | KCH domain containing 1                                                               | chr19 | protein_coding |
| ENSG00000138129    | 2.9480954  | -0.5634035 | 2.53E-06   | 1.37E-05   | 0.08   | 0.07   | 0.59   | 0.52   | ANGPTL6      | angiopoietin-like 6                                                                   | chr19 | protein_coding |
| ENSG00000178726.1  | -1.9667097 | 1.49540319 | 6.63E-09   | 5.23E-08   | 1.03   | 0.72   | 0.23   | 0.38   | THBD         | thrombospondin                                                                        | chr20 | protein_coding |
| ENSG00000102523.13 | 1.9763629  | 1.46001139 | 1.59E-08   | 1.18E-07   | 0.05   | 0.08   | 0.27   | 0.44   | DOPD1        | DOPD domain containing 1                                                              | chr19 | protein_coding |
| ENSG00000099954.17 | 6.04913687 | -2.3636061 | 4.74E-05   | 0.00200301 | 0      | 0      | 0.03   | 0.02   | CECR2        | cat eye syndrome chromosome region, candidate 2                                       | chr22 | protein_coding |
| ENSG0000274933.3   | 4.4030E-06 | -2.7636061 | 4.25E-15   | 7.46E-15   | 0      | 0      | 0      | 0.42   | TBC1D3       | TBC1 domain family, member 3                                                          | chr19 | protein_coding |
| ENSG0000025797.2   | 2.05419295 | 0.95708127 | 3.10E-08   | 2.21E-07   | 0.11   | 0.1    | 2.06   | 0.64   | UTPFL4C      | UTPFL4, US small nuclear ribonucleoprotein, homolog C (yeast)                         | chr13 | protein_coding |
| ENSG0000013595.13  | 4.3486864  | -1.0295638 | 4.03E-09   | 3.50E-08   | 0      | 0.01   | 0.1    | 0.29   | TRIM23       | triglycane motif containing 23                                                        | chr19 | protein_coding |
| ENSG0000007620.3   | -1.0543495 | 8.42159591 | 0.0003407  | 0.00309725 | 310.51 | 292.42 | 192.97 | 153.95 | TRSL         | TRSL3, 20S RNA accumulation, homolog (S. cerevisiae)                                  | chr16 | protein_coding |
| ENSG0000013291.11  | 1.17125539 | 2.77353565 | 0.0003357  | 0.00053844 | 0.71   | 0.73   | 1.91   | 2.41   | DC1N4        | dynactin 4 (c62)                                                                      | chr5  | protein_coding |
| ENSG00000173557.13 | 1.25741954 | -0.494791  | 0.0003841  | 0.01727626 | 0.07   | 0.07   | 0.04   | 1.67   | Covr70       | chromosome 2 open reading frame 70                                                    | chr19 | protein_coding |
| ENSG00000106317.14 | 1.818299   | -0.551789  | 0.070412   | 0.0294377  | 0.14   | 0.05   | 0.27   | 0.33   | SLC6A1E      | solute carrier family 6, member 1E                                                    | chr19 | protein_coding |
| ENSG00000237232.6  | 3.35527459 | -1.8234775 | 0.00010631 | 0.0004256  | 0.06   | 0      | 0.47   | 0.4    | ZNF295-AS1   | ZNF295 antisense RNA 1                                                                | chr21 | lincRNA        |
| ENSG00000149150.7  | -3.1040161 | 2.9914365  | 1.21E-20   | 3.06E-19   | 4.7    | 3.82   | 0.91   | 0.41   | SLC43A1      | solute carrier family 43 (amino acid system L transporter), member 1                  | chr11 | protein_coding |
| ENSG00000187301.7  | 5.1610289  | 0.71836473 | 2.38E-10   | 2.27E-09   | 0.9    | 0.9    | 1.38   | 0.92   | TNOC16       | thiosulfonate domain containing 16                                                    | chr14 | protein_coding |
| ENSG00000266338.5  | -1.186184  | 3.72946165 | 6.39E-05   | 0.0002678  | 2.77   | 3.19   | 1.44   | 2.06   | NBP15        | neuroblastoma breakpoint family, member 15                                            | chr1  | protein_coding |
| ENSG0000027815.2   | 1.2012014  | 2.83305829 | 2.97E-06   | 1.60E-05   | 1.02   | 1.02   | 1.42   | 4.14   | GLUD2        | glutamate decarboxylase 2                                                             | chr9  | lincRNA        |
| ENSG00000096717.1  | 3.18966039 | 2.41460209 | 5.53E-20   | 1.33E-18   | 0.16   | 0.2    | 0.21   | 2.45   | ZAR1         | zinc finger protein 245                                                               | chr10 | protein_coding |
| ENSG00000100485.10 | 2.3707099  | 1.31277767 | 7.28E-11   | 1.46E-06   | 0.07   | 0.16   | 0.59   | 0.98   | SCS2         | son of sevenless homolog 2 (Drosophila)                                               | chr14 | protein_coding |
| ENSG00000101204.14 | 1.3449486  | 1.4634606  | 1.37E-10   | 2.56E-06   | 0.06   | 0.06   | 0.14   | 0      | CHRNA4       | cholinergic receptor, nicotinic, alpha 4 (neuronal)                                   | chr14 | protein_coding |
| ENSG0000014586.13  | 2.01112896 | 1.27630241 | 1.80E-08   | 1.33E-07   | 0.08   | 0.14   | 0.4    | 0.8    | METTL14      | methyltransferase like 14                                                             | chr20 | protein_coding |
| ENSG00000145996.6  | -1.3244258 | 4.44657582 | 5.39E-23   | 1.61E-21   | 5.33   | 5.34   | 0.68   | 0.95   | PH2          | juncophilin 2                                                                         | chr10 | protein_coding |
| ENSG0000026527.8   | 4.47781405 | 4.1265448  | 6.73E-05   | 2.5E-05    | 0.9    | 0.9    | 0.17   | 9.82   | PTPR         | protein tyrosine phosphatase, receptor type                                           | chr3  | protein_coding |
| ENSG00000278709.1  | -1.160054  | 1.37849167 | 0.0004641  | 0.0016411  | 1.37   | 0.8    | 0.52   | 0.78   | RPS-1059L7-- | --                                                                                    | chr20 | antisense      |
| ENSG00000102854.13 | -1.2468393 | 7.61826671 | 1.55E-05   | 7.28E-05   | 99.97  | 80.87  | 51.53  | 47.73  | MSLN         | mesothelin                                                                            | chr16 | protein_coding |
| ENSG00000135960.12 | 1.82041141 | 3.45768337 | 0.0002182  | 0.0003188  | 2.06   | 2.06   | 0.35   | 3.35   | KAL1         | retinoic acid induced 1                                                               | chr4  | protein_coding |
| ENSG00000164683.15 | -3.032897  | 3.26953211 | 1.18E-20   | 2.98E-19   | 4.9    | 5.91   | 0.8    | 0.96   | HEY1         | hls-related family bHLH transcription factor with YRPW motif 1                        | chr8  | protein_coding |
| ENSG0000027572.1   | 1.3861834  | -0.463332  | 0.0024974  | 0.00752149 | 0.2    | 0.16   | 0.45   | 0.78   | RP11-1798Z-- | --                                                                                    | chr10 | antisense      |
| ENSG00000168910.7  | 2.7493937  | 5.501319   | 6.06E-14   | 8.66E-13   | 20.17  | 20.19  | 0.3    | 6.43   | CH3          | gap junction protein, beta 3, 33kDa                                                   | chr1  | protein_coding |
| ENSG00000103154.8  | -2.592401  | 0.54842342 | 1.75E-10   | 1.69E-09   | 1.29   | 0.43   | 0.32   | 0.07   | NECAB2       | N-terminal EF-hand calcium binding protein 2                                          | chr16 | protein_coding |
| ENSG00000266801.1  | 7.511115   | 1.0792445  | 2.21E-12   | 7.2E-11    | 0      | 0      | 0      | 0      | RPS-1146A2   | --                                                                                    | chr16 | antisense      |
| ENSG00000231856.2  | 1.56098716 | 3.358995   | 7.98E-05   | 0.00032858 | 0.23   | 0.16   | 0.7    | 0.84   | RP11-327P2-- | --                                                                                    | chr13 | antisense      |
| ENSG00000141905.16 | 1.1743993  | 8.83403087 | 4.48E-05   | 0.0019402  | 17.89  | 21.38  | 63.54  | 54.24  | NRC          | nuclear factor I/C (CAAT-binding transcription factor)                                | chr19 | protein_coding |
| ENSG00000253671.1  | 6.5400313  | -2.011813  | 6.03E-06   | 6.03E-06   | 0.01   | 0.01   | 0.01   | 0.24   | RP11-80C01   | --                                                                                    | chr8  | protein_coding |
| ENSG0000008546.12  | 2.38429867 | 0.104516   | 2.53E-09   | 2.10E-08   | 0.17   | 0.01   | 0.43   | 0.88   | SESN1        | sestrin 1                                                                             | chr8  | protein_coding |
| ENSG00000134905.15 | -1.1502791 | 7.21264122 | 3.57E-05   | 0.00015694 | 88.36  | 89.44  | 51.13  | 52.58  | CARS2        | cysteine(-)RNA synthetase 2, mitochondrial (putative)                                 | chr13 | protein_coding |
| ENSG00000138413.14 | 1.3814442  | -2.1618208 | 1.07E-06   | 9.85E-06   | 0.05   | 0.05   | 0.1    | 0      | CTCK3        | serine/threonine kinase 3                                                             | chr1  | protein_coding |
| ENSG00000111252.9  | -1.7672004 | 3.09753734 | 9.28E-09   | 7.14E-08   | 1.77   | 2.08   | 0.7    | 0.8    | SH2B3        | SH2B adaptor protein 3                                                                | chr13 | protein_coding |
| ENSG00000185065.6  | -1.4494566 | 0.52368078 | 5.24E-05   | 0.0002267  | 0.82   | 0.78   | 0.35   | 0.4    | AC100085.5   | --                                                                                    | chr22 | antisense      |
| ENSG0000012551.11  | 1.3449895  | 1.7389246  | 1.47E-06   | 1.33E-05   | 26.68  | 26.68  | 0.19   | 13.9   | TRIM13       | thryoid hormone receptor, alpha                                                       | chr1  | protein_coding |
| ENSG00000168661.4  | -1.333277  | 7.28703417 | 4.05E-06   | 2.12E-05   | 41.29  | 38.6   | 1981   | 22.51  | GSOX2        | C10orf46, human alpha                                                                 | chr9  | protein_coding |
| ENSG00000182935.5  | -1.892424  | -1.030987  | 2.13E-13   | 1.2E-12    | 0      | 0      | 0      | 0      | GLI1         | glioma-like protein member 1                                                          | chr19 | protein_coding |
| ENSG0000009250.16  | -2.5301791 | 5.50641415 | 7.78E-17   | 3.40E-15   | 5.1    | 6.51   | 1.22   | 1.46   | NRP1         | neuroxin1                                                                             | chr10 | protein_coding |
| ENSG0000016821.7   | 2.02918419 | 4.0582409  | 3.71E-11   | 3.90E-10   | 2      | 1.71   | 8.99   | 10.99  | PEX11A       | peroxisomal biogenesis factor 11 alpha                                                | chr15 | protein_coding |
| ENSG00000239041.1  | 2.123279   | -2.4437676 | 0.00000001 | 0.00000001 | 0.01   | 0.01   | 0      | 0      | RPS-804P4.6  | --                                                                                    | chr19 | antisense      |
| ENSG00000140043.10 | 1.40702428 | 1.42134395 | 3.49E-05   | 0.00015372 | 0.22   | 0.35   | 0.71   | 1.31   | PTGR2        | prostaglandin synthase related 2                                                      | chr19 | protein_coding |
| ENSG0000008573.6   | -2.067288  | 2.96279794 | 3.90E-11   | 4.09E-10   | 1.81   | 1.53   | 0.52   | 0.54   | COL5A3       | collagen, type V, alpha 3                                                             | chr14 | protein_coding |
| ENSG0000016968.7   | 2.61724245 | 0.9307977  | 1.78E-06   | 1.29E-07   | 1.4    | 1.48   | 0.1    | 4.54   | TAMM58L      | transmembrane protein 58L                                                             | chr1  | protein_coding |
| ENSG00000105176.16 | 1.0713851  | 3.9775683  | 0.0001802  | 0.00085958 | 1.99   | 2.54   | 5.14   | 7.91   | URL1         | proteobion-like chaperone                                                             | chr19 | protein_coding |
| ENSG0000013770.12  | 1.9716149  | 1.81341147 | 0.00128    | 2.18E-07   | 0.15   | 0.1    | 0.49   | 0.79   | C10SP2L2     | C10orf46, terminal domain, RNA polymerase II, polypeptide A) small phosphatase like 2 | chr15 | protein_coding |
| ENSG0000012454.12  | 4.3894716  | 1.92412941 | 1.37E-10   | 2.98E-17   | 0.02   | 0.02   | 0.1    | 0.78   | MSLBP1       | MSLB binding protein 1                                                                | chr1  | protein_coding |
| ENSG00000229152.2  | 5.0564572  | -2.9744029 | 0.010455   | 0.02582742 | 0      | 0      | 0.12   | 0.2    | ANKRD10-IT1  | ANKRD10 intronic transcript 1                                                         | chr13 | sense_intronic |
| ENSG00000076539.8  | 2.46366218 | 1.53552229 | 4.84E-11   | 5.63E-11   | 0.09   | 0.09   | 0.47   | 0.88   | MBP2         | RNA binding motif protein 2                                                           | chr11 | protein_coding |
| ENSG00000138182.12 | 1.5082285  | 1.7265E-10 | 2.15E-09   | 2.15E-09   | 0.36   | 0.69   | 2.49   | 3.52   | ATAD1        | ATPase family AAA domain containing 1                                                 | chr1  | protein_coding |
| ENSG00000117000.8  | 3.38409276 | 0.66166139 | 8.89E-15   | 1.39E-13   | 0.05   | 0.01   | 0.28   | 0.65   | RIF          | rearranged L-myc fusion                                                               | chr1  | protein_coding |
| ENSG0000025900.9   | 1.3608204  | 1.72770474 | 0.00000001 | 0.00000001 | 0.19   | 0.16   | 0.1    | 0.6    | ANAPC4       | anaplastic promitotic complex subunit 4                                               | chr4  | protein_coding |
| ENSG0000023396.6   | 2.0126032  | -2.018611  | 0.01397446 | 0.03477946 | 0      | 0.06   | 0.16   | 0.15   | RP11-458D2   | --                                                                                    | chr1  | -cRNA          |
| ENSG00000116106.10 | 6.2203954  | -2.2453676 | 1.55E-05   | 7.26E-05   | 0      | 0      | 0.08   | 0.02   | EPHA4        | EPH receptor A4                                                                       | chr2  | protein_coding |
| ENSG00000196939.8  | 1.61139675 | 0.3200008  | 0.00000001 | 0.00000001 | 0.06   | 0.06   | 0.1    | 0.67   | CTDZ77       | CTDZ77                                                                                | chr4  | protein_coding |
| ENSG00000129128.11 | 1.42729046 | 3.339959   | 2.57E-06   | 1.39E-05   | 1.05   | 0.88   | 2.73   | 4.19   | SPC53        | spinal oncofetal complex subunit 3 (H. cerevisiae)                                    | chr7  | protein_coding |
| ENSG0000015855.13  | -1.3700281 | 3.02033396 | 6.82E-06   | 3.42E-05   | 1.64   | 1.38   | 0.8    | 0.75   | GDPD5        | glycerophosphatidyl phosphodiesterase domain containing 5                             | chr11 | protein_coding |
| ENSG0000015925.8   | 1.363613   | 1.761526   | 6.91E-11   | 8.81E-12   | 0.1    | 0.1    | 0.18   | 1.68   | PKOX1        | protein kinase OX1                                                                    | chr1  | protein_coding |
|                    |            |            |            |            |        |        |        |        |              |                                                                                       |       |                |

|                    |            |            |           |            |       |        |        |         |                                                              |                                                        |                                                                                    |                |                |      |      |     |      |      |     |      |      |     |      |      |     |      |      |     |      |      |     |      |      |     |      |      |     |      |      |     |      |      |     |      |      |     |      |      |     |      |      |     |      |      |     |      |      |     |      |      |     |      |      |     |      |      |     |      |      |     |      |      |     |      |      |     |      |      |     |      |      |     |      |      |     |      |      |     |      |      |     |      |      |     |      |      |     |      |      |     |      |      |     |      |      |     |      |      |     |      |      |     |      |      |     |      |      |     |      |      |     |      |      |     |      |      |     |      |      |     |      |      |     |      |      |     |      |      |     |      |      |     |      |      |     |      |      |     |      |      |     |      |      |     |      |      |     |      |      |     |      |      |     |      |      |     |      |      |     |      |      |     |      |      |     |      |      |     |      |      |     |      |      |     |      |      |     |      |      |     |      |      |     |      |      |     |      |      |     |      |      |     |      |      |     |      |      |     |      |      |     |      |      |     |      |      |     |      |      |     |      |      |     |      |      |     |      |      |     |      |      |     |      |      |     |      |      |     |      |      |     |      |      |     |      |      |     |      |      |     |      |      |     |      |      |     |      |      |     |      |      |     |      |      |     |      |      |     |      |      |     |      |      |     |      |      |     |      |      |     |      |      |     |      |      |     |      |      |     |      |      |     |      |      |     |      |      |     |      |      |     |      |      |     |      |      |     |      |      |     |      |      |     |      |      |     |      |      |     |      |      |     |      |      |     |      |      |     |      |      |     |      |      |     |      |      |     |      |      |     |      |      |     |      |      |     |      |      |     |      |      |     |      |      |     |      |      |     |      |      |     |      |      |     |      |      |     |      |      |     |      |      |     |      |      |     |      |      |     |      |      |     |      |      |     |      |      |     |      |      |     |      |      |     |      |      |     |      |      |     |      |      |     |      |      |     |      |      |     |      |      |     |      |      |     |      |      |     |      |      |     |      |      |     |      |      |  |
|--------------------|------------|------------|-----------|------------|-------|--------|--------|---------|--------------------------------------------------------------|--------------------------------------------------------|------------------------------------------------------------------------------------|----------------|----------------|------|------|-----|------|------|-----|------|------|-----|------|------|-----|------|------|-----|------|------|-----|------|------|-----|------|------|-----|------|------|-----|------|------|-----|------|------|-----|------|------|-----|------|------|-----|------|------|-----|------|------|-----|------|------|-----|------|------|-----|------|------|-----|------|------|-----|------|------|-----|------|------|-----|------|------|-----|------|------|-----|------|------|-----|------|------|-----|------|------|-----|------|------|-----|------|------|-----|------|------|-----|------|------|-----|------|------|-----|------|------|-----|------|------|-----|------|------|-----|------|------|-----|------|------|-----|------|------|-----|------|------|-----|------|------|-----|------|------|-----|------|------|-----|------|------|-----|------|------|-----|------|------|-----|------|------|-----|------|------|-----|------|------|-----|------|------|-----|------|------|-----|------|------|-----|------|------|-----|------|------|-----|------|------|-----|------|------|-----|------|------|-----|------|------|-----|------|------|-----|------|------|-----|------|------|-----|------|------|-----|------|------|-----|------|------|-----|------|------|-----|------|------|-----|------|------|-----|------|------|-----|------|------|-----|------|------|-----|------|------|-----|------|------|-----|------|------|-----|------|------|-----|------|------|-----|------|------|-----|------|------|-----|------|------|-----|------|------|-----|------|------|-----|------|------|-----|------|------|-----|------|------|-----|------|------|-----|------|------|-----|------|------|-----|------|------|-----|------|------|-----|------|------|-----|------|------|-----|------|------|-----|------|------|-----|------|------|-----|------|------|-----|------|------|-----|------|------|-----|------|------|-----|------|------|-----|------|------|-----|------|------|-----|------|------|-----|------|------|-----|------|------|-----|------|------|-----|------|------|-----|------|------|-----|------|------|-----|------|------|-----|------|------|-----|------|------|-----|------|------|-----|------|------|-----|------|------|-----|------|------|-----|------|------|-----|------|------|-----|------|------|-----|------|------|-----|------|------|-----|------|------|-----|------|------|-----|------|------|-----|------|------|-----|------|------|-----|------|------|-----|------|------|-----|------|------|-----|------|------|-----|------|------|-----|------|------|-----|------|------|-----|------|------|-----|------|------|-----|------|------|-----|------|------|-----|------|------|-----|------|------|-----|------|------|-----|------|------|-----|------|------|--|
| ENSG000002596.11   | -1.129272  | 761427905  | 3.201259  | 0.00049644 | 3.36  | 207.44 | 136.34 | 14356   | HSD17B8                                                      | hydroxytestosterone (17-beta) hydroxylase D10          |                                                                                    | chrM           | protein_coding |      |      |     |      |      |     |      |      |     |      |      |     |      |      |     |      |      |     |      |      |     |      |      |     |      |      |     |      |      |     |      |      |     |      |      |     |      |      |     |      |      |     |      |      |     |      |      |     |      |      |     |      |      |     |      |      |     |      |      |     |      |      |     |      |      |     |      |      |     |      |      |     |      |      |     |      |      |     |      |      |     |      |      |     |      |      |     |      |      |     |      |      |     |      |      |     |      |      |     |      |      |     |      |      |     |      |      |     |      |      |     |      |      |     |      |      |     |      |      |     |      |      |     |      |      |     |      |      |     |      |      |     |      |      |     |      |      |     |      |      |     |      |      |     |      |      |     |      |      |     |      |      |     |      |      |     |      |      |     |      |      |     |      |      |     |      |      |     |      |      |     |      |      |     |      |      |     |      |      |     |      |      |     |      |      |     |      |      |     |      |      |     |      |      |     |      |      |     |      |      |     |      |      |     |      |      |     |      |      |     |      |      |     |      |      |     |      |      |     |      |      |     |      |      |     |      |      |     |      |      |     |      |      |     |      |      |     |      |      |     |      |      |     |      |      |     |      |      |     |      |      |     |      |      |     |      |      |     |      |      |     |      |      |     |      |      |     |      |      |     |      |      |     |      |      |     |      |      |     |      |      |     |      |      |     |      |      |     |      |      |     |      |      |     |      |      |     |      |      |     |      |      |     |      |      |     |      |      |     |      |      |     |      |      |     |      |      |     |      |      |     |      |      |     |      |      |     |      |      |     |      |      |     |      |      |     |      |      |     |      |      |     |      |      |     |      |      |     |      |      |     |      |      |     |      |      |     |      |      |     |      |      |     |      |      |     |      |      |     |      |      |     |      |      |     |      |      |     |      |      |     |      |      |     |      |      |     |      |      |     |      |      |     |      |      |     |      |      |     |      |      |     |      |      |     |      |      |     |      |      |     |      |      |  |
| ENSG000002596.11   | 1.66962897 | 0.21340707 | 0.000205  | 0.0001451  | 2.29  | 9.72   | 28.17  | MT- TK  | mitochondrially encoded tRNA Isoleucine                      |                                                        | chrX                                                                               | antisense      |                |      |      |     |      |      |     |      |      |     |      |      |     |      |      |     |      |      |     |      |      |     |      |      |     |      |      |     |      |      |     |      |      |     |      |      |     |      |      |     |      |      |     |      |      |     |      |      |     |      |      |     |      |      |     |      |      |     |      |      |     |      |      |     |      |      |     |      |      |     |      |      |     |      |      |     |      |      |     |      |      |     |      |      |     |      |      |     |      |      |     |      |      |     |      |      |     |      |      |     |      |      |     |      |      |     |      |      |     |      |      |     |      |      |     |      |      |     |      |      |     |      |      |     |      |      |     |      |      |     |      |      |     |      |      |     |      |      |     |      |      |     |      |      |     |      |      |     |      |      |     |      |      |     |      |      |     |      |      |     |      |      |     |      |      |     |      |      |     |      |      |     |      |      |     |      |      |     |      |      |     |      |      |     |      |      |     |      |      |     |      |      |     |      |      |     |      |      |     |      |      |     |      |      |     |      |      |     |      |      |     |      |      |     |      |      |     |      |      |     |      |      |     |      |      |     |      |      |     |      |      |     |      |      |     |      |      |     |      |      |     |      |      |     |      |      |     |      |      |     |      |      |     |      |      |     |      |      |     |      |      |     |      |      |     |      |      |     |      |      |     |      |      |     |      |      |     |      |      |     |      |      |     |      |      |     |      |      |     |      |      |     |      |      |     |      |      |     |      |      |     |      |      |     |      |      |     |      |      |     |      |      |     |      |      |     |      |      |     |      |      |     |      |      |     |      |      |     |      |      |     |      |      |     |      |      |     |      |      |     |      |      |     |      |      |     |      |      |     |      |      |     |      |      |     |      |      |     |      |      |     |      |      |     |      |      |     |      |      |     |      |      |     |      |      |     |      |      |     |      |      |     |      |      |     |      |      |     |      |      |     |      |      |     |      |      |     |      |      |     |      |      |     |      |      |     |      |      |     |      |      |     |      |      |  |
| ENSG0000010958.10  | -4.424784  | 0.018892   | 1.326     | 2.43E-15   | 0.31  | 0.33   | 0.04   | GALNT7  | polypeptide N-acetylglucosaminyltransferase 7                |                                                        | chr4                                                                               | protein_coding |                |      |      |     |      |      |     |      |      |     |      |      |     |      |      |     |      |      |     |      |      |     |      |      |     |      |      |     |      |      |     |      |      |     |      |      |     |      |      |     |      |      |     |      |      |     |      |      |     |      |      |     |      |      |     |      |      |     |      |      |     |      |      |     |      |      |     |      |      |     |      |      |     |      |      |     |      |      |     |      |      |     |      |      |     |      |      |     |      |      |     |      |      |     |      |      |     |      |      |     |      |      |     |      |      |     |      |      |     |      |      |     |      |      |     |      |      |     |      |      |     |      |      |     |      |      |     |      |      |     |      |      |     |      |      |     |      |      |     |      |      |     |      |      |     |      |      |     |      |      |     |      |      |     |      |      |     |      |      |     |      |      |     |      |      |     |      |      |     |      |      |     |      |      |     |      |      |     |      |      |     |      |      |     |      |      |     |      |      |     |      |      |     |      |      |     |      |      |     |      |      |     |      |      |     |      |      |     |      |      |     |      |      |     |      |      |     |      |      |     |      |      |     |      |      |     |      |      |     |      |      |     |      |      |     |      |      |     |      |      |     |      |      |     |      |      |     |      |      |     |      |      |     |      |      |     |      |      |     |      |      |     |      |      |     |      |      |     |      |      |     |      |      |     |      |      |     |      |      |     |      |      |     |      |      |     |      |      |     |      |      |     |      |      |     |      |      |     |      |      |     |      |      |     |      |      |     |      |      |     |      |      |     |      |      |     |      |      |     |      |      |     |      |      |     |      |      |     |      |      |     |      |      |     |      |      |     |      |      |     |      |      |     |      |      |     |      |      |     |      |      |     |      |      |     |      |      |     |      |      |     |      |      |     |      |      |     |      |      |     |      |      |     |      |      |     |      |      |     |      |      |     |      |      |     |      |      |     |      |      |     |      |      |     |      |      |     |      |      |     |      |      |     |      |      |     |      |      |     |      |      |     |      |      |  |
| ENSG0000010958.10  | 0.0046704  | 0.187323   | 0.000205  | 0.0001451  | 0.31  | 0.33   | 0.04   | ADAPTOR | adaptor-related protein complex 1, sigma 3 subunit           |                                                        | chr9                                                                               | antisense      |                |      |      |     |      |      |     |      |      |     |      |      |     |      |      |     |      |      |     |      |      |     |      |      |     |      |      |     |      |      |     |      |      |     |      |      |     |      |      |     |      |      |     |      |      |     |      |      |     |      |      |     |      |      |     |      |      |     |      |      |     |      |      |     |      |      |     |      |      |     |      |      |     |      |      |     |      |      |     |      |      |     |      |      |     |      |      |     |      |      |     |      |      |     |      |      |     |      |      |     |      |      |     |      |      |     |      |      |     |      |      |     |      |      |     |      |      |     |      |      |     |      |      |     |      |      |     |      |      |     |      |      |     |      |      |     |      |      |     |      |      |     |      |      |     |      |      |     |      |      |     |      |      |     |      |      |     |      |      |     |      |      |     |      |      |     |      |      |     |      |      |     |      |      |     |      |      |     |      |      |     |      |      |     |      |      |     |      |      |     |      |      |     |      |      |     |      |      |     |      |      |     |      |      |     |      |      |     |      |      |     |      |      |     |      |      |     |      |      |     |      |      |     |      |      |     |      |      |     |      |      |     |      |      |     |      |      |     |      |      |     |      |      |     |      |      |     |      |      |     |      |      |     |      |      |     |      |      |     |      |      |     |      |      |     |      |      |     |      |      |     |      |      |     |      |      |     |      |      |     |      |      |     |      |      |     |      |      |     |      |      |     |      |      |     |      |      |     |      |      |     |      |      |     |      |      |     |      |      |     |      |      |     |      |      |     |      |      |     |      |      |     |      |      |     |      |      |     |      |      |     |      |      |     |      |      |     |      |      |     |      |      |     |      |      |     |      |      |     |      |      |     |      |      |     |      |      |     |      |      |     |      |      |     |      |      |     |      |      |     |      |      |     |      |      |     |      |      |     |      |      |     |      |      |     |      |      |     |      |      |     |      |      |     |      |      |     |      |      |     |      |      |     |      |      |     |      |      |     |      |      |     |      |      |  |
| ENSG0000014833.11  | -1.0047418 | 0.67915663 | 0.0003284 | 0.00103504 | 26.85 | 25.41  | 16.88  | BMRB    | amino repeat and SOCS box containing 6                       |                                                        | chr9                                                                               | protein_coding |                |      |      |     |      |      |     |      |      |     |      |      |     |      |      |     |      |      |     |      |      |     |      |      |     |      |      |     |      |      |     |      |      |     |      |      |     |      |      |     |      |      |     |      |      |     |      |      |     |      |      |     |      |      |     |      |      |     |      |      |     |      |      |     |      |      |     |      |      |     |      |      |     |      |      |     |      |      |     |      |      |     |      |      |     |      |      |     |      |      |     |      |      |     |      |      |     |      |      |     |      |      |     |      |      |     |      |      |     |      |      |     |      |      |     |      |      |     |      |      |     |      |      |     |      |      |     |      |      |     |      |      |     |      |      |     |      |      |     |      |      |     |      |      |     |      |      |     |      |      |     |      |      |     |      |      |     |      |      |     |      |      |     |      |      |     |      |      |     |      |      |     |      |      |     |      |      |     |      |      |     |      |      |     |      |      |     |      |      |     |      |      |     |      |      |     |      |      |     |      |      |     |      |      |     |      |      |     |      |      |     |      |      |     |      |      |     |      |      |     |      |      |     |      |      |     |      |      |     |      |      |     |      |      |     |      |      |     |      |      |     |      |      |     |      |      |     |      |      |     |      |      |     |      |      |     |      |      |     |      |      |     |      |      |     |      |      |     |      |      |     |      |      |     |      |      |     |      |      |     |      |      |     |      |      |     |      |      |     |      |      |     |      |      |     |      |      |     |      |      |     |      |      |     |      |      |     |      |      |     |      |      |     |      |      |     |      |      |     |      |      |     |      |      |     |      |      |     |      |      |     |      |      |     |      |      |     |      |      |     |      |      |     |      |      |     |      |      |     |      |      |     |      |      |     |      |      |     |      |      |     |      |      |     |      |      |     |      |      |     |      |      |     |      |      |     |      |      |     |      |      |     |      |      |     |      |      |     |      |      |     |      |      |     |      |      |     |      |      |     |      |      |     |      |      |     |      |      |     |      |      |     |      |      |  |
| ENSG0000011849.13  | 2.262133   | 2.286343   | 8.07E-12  | 9.14E-11   | 0.19  | 0.13   | 0.3    | LCA     | CENP-A                                                       |                                                        | chr11                                                                              | protein_coding |                |      |      |     |      |      |     |      |      |     |      |      |     |      |      |     |      |      |     |      |      |     |      |      |     |      |      |     |      |      |     |      |      |     |      |      |     |      |      |     |      |      |     |      |      |     |      |      |     |      |      |     |      |      |     |      |      |     |      |      |     |      |      |     |      |      |     |      |      |     |      |      |     |      |      |     |      |      |     |      |      |     |      |      |     |      |      |     |      |      |     |      |      |     |      |      |     |      |      |     |      |      |     |      |      |     |      |      |     |      |      |     |      |      |     |      |      |     |      |      |     |      |      |     |      |      |     |      |      |     |      |      |     |      |      |     |      |      |     |      |      |     |      |      |     |      |      |     |      |      |     |      |      |     |      |      |     |      |      |     |      |      |     |      |      |     |      |      |     |      |      |     |      |      |     |      |      |     |      |      |     |      |      |     |      |      |     |      |      |     |      |      |     |      |      |     |      |      |     |      |      |     |      |      |     |      |      |     |      |      |     |      |      |     |      |      |     |      |      |     |      |      |     |      |      |     |      |      |     |      |      |     |      |      |     |      |      |     |      |      |     |      |      |     |      |      |     |      |      |     |      |      |     |      |      |     |      |      |     |      |      |     |      |      |     |      |      |     |      |      |     |      |      |     |      |      |     |      |      |     |      |      |     |      |      |     |      |      |     |      |      |     |      |      |     |      |      |     |      |      |     |      |      |     |      |      |     |      |      |     |      |      |     |      |      |     |      |      |     |      |      |     |      |      |     |      |      |     |      |      |     |      |      |     |      |      |     |      |      |     |      |      |     |      |      |     |      |      |     |      |      |     |      |      |     |      |      |     |      |      |     |      |      |     |      |      |     |      |      |     |      |      |     |      |      |     |      |      |     |      |      |     |      |      |     |      |      |     |      |      |     |      |      |     |      |      |     |      |      |     |      |      |     |      |      |     |      |      |     |      |      |     |      |      |  |
| ENSG0000014919.14  | 3.952019   | 0.1210907  | 6.18E-24  | 1.97E-22   | 0.11  | 0.16   | 0.18   | ZNF282  | zinc finger protein                                          |                                                        | chr11                                                                              | protein_coding |                |      |      |     |      |      |     |      |      |     |      |      |     |      |      |     |      |      |     |      |      |     |      |      |     |      |      |     |      |      |     |      |      |     |      |      |     |      |      |     |      |      |     |      |      |     |      |      |     |      |      |     |      |      |     |      |      |     |      |      |     |      |      |     |      |      |     |      |      |     |      |      |     |      |      |     |      |      |     |      |      |     |      |      |     |      |      |     |      |      |     |      |      |     |      |      |     |      |      |     |      |      |     |      |      |     |      |      |     |      |      |     |      |      |     |      |      |     |      |      |     |      |      |     |      |      |     |      |      |     |      |      |     |      |      |     |      |      |     |      |      |     |      |      |     |      |      |     |      |      |     |      |      |     |      |      |     |      |      |     |      |      |     |      |      |     |      |      |     |      |      |     |      |      |     |      |      |     |      |      |     |      |      |     |      |      |     |      |      |     |      |      |     |      |      |     |      |      |     |      |      |     |      |      |     |      |      |     |      |      |     |      |      |     |      |      |     |      |      |     |      |      |     |      |      |     |      |      |     |      |      |     |      |      |     |      |      |     |      |      |     |      |      |     |      |      |     |      |      |     |      |      |     |      |      |     |      |      |     |      |      |     |      |      |     |      |      |     |      |      |     |      |      |     |      |      |     |      |      |     |      |      |     |      |      |     |      |      |     |      |      |     |      |      |     |      |      |     |      |      |     |      |      |     |      |      |     |      |      |     |      |      |     |      |      |     |      |      |     |      |      |     |      |      |     |      |      |     |      |      |     |      |      |     |      |      |     |      |      |     |      |      |     |      |      |     |      |      |     |      |      |     |      |      |     |      |      |     |      |      |     |      |      |     |      |      |     |      |      |     |      |      |     |      |      |     |      |      |     |      |      |     |      |      |     |      |      |     |      |      |     |      |      |     |      |      |     |      |      |     |      |      |     |      |      |     |      |      |     |      |      |     |      |      |  |
| ENSG0000010367.10  | 1.2541338  | 4.41353087 | 1.41E-13  | 1.83E-12   | 0.12  | 0.13   | 0.4    | DCAF6   | CRAMP domain protein 1                                       |                                                        | chr13                                                                              | protein_coding |                |      |      |     |      |      |     |      |      |     |      |      |     |      |      |     |      |      |     |      |      |     |      |      |     |      |      |     |      |      |     |      |      |     |      |      |     |      |      |     |      |      |     |      |      |     |      |      |     |      |      |     |      |      |     |      |      |     |      |      |     |      |      |     |      |      |     |      |      |     |      |      |     |      |      |     |      |      |     |      |      |     |      |      |     |      |      |     |      |      |     |      |      |     |      |      |     |      |      |     |      |      |     |      |      |     |      |      |     |      |      |     |      |      |     |      |      |     |      |      |     |      |      |     |      |      |     |      |      |     |      |      |     |      |      |     |      |      |     |      |      |     |      |      |     |      |      |     |      |      |     |      |      |     |      |      |     |      |      |     |      |      |     |      |      |     |      |      |     |      |      |     |      |      |     |      |      |     |      |      |     |      |      |     |      |      |     |      |      |     |      |      |     |      |      |     |      |      |     |      |      |     |      |      |     |      |      |     |      |      |     |      |      |     |      |      |     |      |      |     |      |      |     |      |      |     |      |      |     |      |      |     |      |      |     |      |      |     |      |      |     |      |      |     |      |      |     |      |      |     |      |      |     |      |      |     |      |      |     |      |      |     |      |      |     |      |      |     |      |      |     |      |      |     |      |      |     |      |      |     |      |      |     |      |      |     |      |      |     |      |      |     |      |      |     |      |      |     |      |      |     |      |      |     |      |      |     |      |      |     |      |      |     |      |      |     |      |      |     |      |      |     |      |      |     |      |      |     |      |      |     |      |      |     |      |      |     |      |      |     |      |      |     |      |      |     |      |      |     |      |      |     |      |      |     |      |      |     |      |      |     |      |      |     |      |      |     |      |      |     |      |      |     |      |      |     |      |      |     |      |      |     |      |      |     |      |      |     |      |      |     |      |      |     |      |      |     |      |      |     |      |      |     |      |      |     |      |      |     |      |      |     |      |      |  |
| ENSG0000010367.10  | 2.252514   | 0.6830355  | 1.07E-12  | 1.31E-11   | 0.14  | 0.12   | 0.08   | CEP350  | cysteine rich protein 350 kDa                                |                                                        | chr13                                                                              | protein_coding |                |      |      |     |      |      |     |      |      |     |      |      |     |      |      |     |      |      |     |      |      |     |      |      |     |      |      |     |      |      |     |      |      |     |      |      |     |      |      |     |      |      |     |      |      |     |      |      |     |      |      |     |      |      |     |      |      |     |      |      |     |      |      |     |      |      |     |      |      |     |      |      |     |      |      |     |      |      |     |      |      |     |      |      |     |      |      |     |      |      |     |      |      |     |      |      |     |      |      |     |      |      |     |      |      |     |      |      |     |      |      |     |      |      |     |      |      |     |      |      |     |      |      |     |      |      |     |      |      |     |      |      |     |      |      |     |      |      |     |      |      |     |      |      |     |      |      |     |      |      |     |      |      |     |      |      |     |      |      |     |      |      |     |      |      |     |      |      |     |      |      |     |      |      |     |      |      |     |      |      |     |      |      |     |      |      |     |      |      |     |      |      |     |      |      |     |      |      |     |      |      |     |      |      |     |      |      |     |      |      |     |      |      |     |      |      |     |      |      |     |      |      |     |      |      |     |      |      |     |      |      |     |      |      |     |      |      |     |      |      |     |      |      |     |      |      |     |      |      |     |      |      |     |      |      |     |      |      |     |      |      |     |      |      |     |      |      |     |      |      |     |      |      |     |      |      |     |      |      |     |      |      |     |      |      |     |      |      |     |      |      |     |      |      |     |      |      |     |      |      |     |      |      |     |      |      |     |      |      |     |      |      |     |      |      |     |      |      |     |      |      |     |      |      |     |      |      |     |      |      |     |      |      |     |      |      |     |      |      |     |      |      |     |      |      |     |      |      |     |      |      |     |      |      |     |      |      |     |      |      |     |      |      |     |      |      |     |      |      |     |      |      |     |      |      |     |      |      |     |      |      |     |      |      |     |      |      |     |      |      |     |      |      |     |      |      |     |      |      |     |      |      |     |      |      |     |      |      |     |      |      |     |      |      |  |
| ENSG0000018700.12  | 1.48413698 | 2.0793367  | 5.44E-33  | 2.91E-31   | 0.13  | 0.13   | 0.03   | OPEA1   | platelet endothelial aggregation receptor 1                  |                                                        | chr17                                                                              | protein_coding |                |      |      |     |      |      |     |      |      |     |      |      |     |      |      |     |      |      |     |      |      |     |      |      |     |      |      |     |      |      |     |      |      |     |      |      |     |      |      |     |      |      |     |      |      |     |      |      |     |      |      |     |      |      |     |      |      |     |      |      |     |      |      |     |      |      |     |      |      |     |      |      |     |      |      |     |      |      |     |      |      |     |      |      |     |      |      |     |      |      |     |      |      |     |      |      |     |      |      |     |      |      |     |      |      |     |      |      |     |      |      |     |      |      |     |      |      |     |      |      |     |      |      |     |      |      |     |      |      |     |      |      |     |      |      |     |      |      |     |      |      |     |      |      |     |      |      |     |      |      |     |      |      |     |      |      |     |      |      |     |      |      |     |      |      |     |      |      |     |      |      |     |      |      |     |      |      |     |      |      |     |      |      |     |      |      |     |      |      |     |      |      |     |      |      |     |      |      |     |      |      |     |      |      |     |      |      |     |      |      |     |      |      |     |      |      |     |      |      |     |      |      |     |      |      |     |      |      |     |      |      |     |      |      |     |      |      |     |      |      |     |      |      |     |      |      |     |      |      |     |      |      |     |      |      |     |      |      |     |      |      |     |      |      |     |      |      |     |      |      |     |      |      |     |      |      |     |      |      |     |      |      |     |      |      |     |      |      |     |      |      |     |      |      |     |      |      |     |      |      |     |      |      |     |      |      |     |      |      |     |      |      |     |      |      |     |      |      |     |      |      |     |      |      |     |      |      |     |      |      |     |      |      |     |      |      |     |      |      |     |      |      |     |      |      |     |      |      |     |      |      |     |      |      |     |      |      |     |      |      |     |      |      |     |      |      |     |      |      |     |      |      |     |      |      |     |      |      |     |      |      |     |      |      |     |      |      |     |      |      |     |      |      |     |      |      |     |      |      |     |      |      |     |      |      |     |      |      |     |      |      |     |      |      |  |
| ENSG00000108256.7  | 2.56572954 | 3.6959306  | 3.56E-15  | 5.83E-15   | 0.22  | 0.34   | 2.02   | NUPR2   | nucleolar X mental retardation protein interacting protein 2 |                                                        | chr17                                                                              | protein_coding |                |      |      |     |      |      |     |      |      |     |      |      |     |      |      |     |      |      |     |      |      |     |      |      |     |      |      |     |      |      |     |      |      |     |      |      |     |      |      |     |      |      |     |      |      |     |      |      |     |      |      |     |      |      |     |      |      |     |      |      |     |      |      |     |      |      |     |      |      |     |      |      |     |      |      |     |      |      |     |      |      |     |      |      |     |      |      |     |      |      |     |      |      |     |      |      |     |      |      |     |      |      |     |      |      |     |      |      |     |      |      |     |      |      |     |      |      |     |      |      |     |      |      |     |      |      |     |      |      |     |      |      |     |      |      |     |      |      |     |      |      |     |      |      |     |      |      |     |      |      |     |      |      |     |      |      |     |      |      |     |      |      |     |      |      |     |      |      |     |      |      |     |      |      |     |      |      |     |      |      |     |      |      |     |      |      |     |      |      |     |      |      |     |      |      |     |      |      |     |      |      |     |      |      |     |      |      |     |      |      |     |      |      |     |      |      |     |      |      |     |      |      |     |      |      |     |      |      |     |      |      |     |      |      |     |      |      |     |      |      |     |      |      |     |      |      |     |      |      |     |      |      |     |      |      |     |      |      |     |      |      |     |      |      |     |      |      |     |      |      |     |      |      |     |      |      |     |      |      |     |      |      |     |      |      |     |      |      |     |      |      |     |      |      |     |      |      |     |      |      |     |      |      |     |      |      |     |      |      |     |      |      |     |      |      |     |      |      |     |      |      |     |      |      |     |      |      |     |      |      |     |      |      |     |      |      |     |      |      |     |      |      |     |      |      |     |      |      |     |      |      |     |      |      |     |      |      |     |      |      |     |      |      |     |      |      |     |      |      |     |      |      |     |      |      |     |      |      |     |      |      |     |      |      |     |      |      |     |      |      |     |      |      |     |      |      |     |      |      |     |      |      |     |      |      |     |      |      |     |      |      |     |      |      |  |
| ENSG0000010728.9   | 3.0568702  | 7.3454532  | 1.16E-38  | 6.38E-36   | 0.02  | 0.02   | 284.93 | COTL1   | COTL1 molecule                                               |                                                        | chr19                                                                              | protein_coding |                |      |      |     |      |      |     |      |      |     |      |      |     |      |      |     |      |      |     |      |      |     |      |      |     |      |      |     |      |      |     |      |      |     |      |      |     |      |      |     |      |      |     |      |      |     |      |      |     |      |      |     |      |      |     |      |      |     |      |      |     |      |      |     |      |      |     |      |      |     |      |      |     |      |      |     |      |      |     |      |      |     |      |      |     |      |      |     |      |      |     |      |      |     |      |      |     |      |      |     |      |      |     |      |      |     |      |      |     |      |      |     |      |      |     |      |      |     |      |      |     |      |      |     |      |      |     |      |      |     |      |      |     |      |      |     |      |      |     |      |      |     |      |      |     |      |      |     |      |      |     |      |      |     |      |      |     |      |      |     |      |      |     |      |      |     |      |      |     |      |      |     |      |      |     |      |      |     |      |      |     |      |      |     |      |      |     |      |      |     |      |      |     |      |      |     |      |      |     |      |      |     |      |      |     |      |      |     |      |      |     |      |      |     |      |      |     |      |      |     |      |      |     |      |      |     |      |      |     |      |      |     |      |      |     |      |      |     |      |      |     |      |      |     |      |      |     |      |      |     |      |      |     |      |      |     |      |      |     |      |      |     |      |      |     |      |      |     |      |      |     |      |      |     |      |      |     |      |      |     |      |      |     |      |      |     |      |      |     |      |      |     |      |      |     |      |      |     |      |      |     |      |      |     |      |      |     |      |      |     |      |      |     |      |      |     |      |      |     |      |      |     |      |      |     |      |      |     |      |      |     |      |      |     |      |      |     |      |      |     |      |      |     |      |      |     |      |      |     |      |      |     |      |      |     |      |      |     |      |      |     |      |      |     |      |      |     |      |      |     |      |      |     |      |      |     |      |      |     |      |      |     |      |      |     |      |      |     |      |      |     |      |      |     |      |      |     |      |      |     |      |      |     |      |      |     |      |      |     |      |      |     |      |      |  |
| ENSG0000023562.6   | 1.9730301  | -0.042487  | 0.0203581 | 0.0482421  | 0     | 0      | 0.02   | 0       | 0.09 RPI1-545E.1                                             |                                                        | chr2                                                                               | antisense      |                |      |      |     |      |      |     |      |      |     |      |      |     |      |      |     |      |      |     |      |      |     |      |      |     |      |      |     |      |      |     |      |      |     |      |      |     |      |      |     |      |      |     |      |      |     |      |      |     |      |      |     |      |      |     |      |      |     |      |      |     |      |      |     |      |      |     |      |      |     |      |      |     |      |      |     |      |      |     |      |      |     |      |      |     |      |      |     |      |      |     |      |      |     |      |      |     |      |      |     |      |      |     |      |      |     |      |      |     |      |      |     |      |      |     |      |      |     |      |      |     |      |      |     |      |      |     |      |      |     |      |      |     |      |      |     |      |      |     |      |      |     |      |      |     |      |      |     |      |      |     |      |      |     |      |      |     |      |      |     |      |      |     |      |      |     |      |      |     |      |      |     |      |      |     |      |      |     |      |      |     |      |      |     |      |      |     |      |      |     |      |      |     |      |      |     |      |      |     |      |      |     |      |      |     |      |      |     |      |      |     |      |      |     |      |      |     |      |      |     |      |      |     |      |      |     |      |      |     |      |      |     |      |      |     |      |      |     |      |      |     |      |      |     |      |      |     |      |      |     |      |      |     |      |      |     |      |      |     |      |      |     |      |      |     |      |      |     |      |      |     |      |      |     |      |      |     |      |      |     |      |      |     |      |      |     |      |      |     |      |      |     |      |      |     |      |      |     |      |      |     |      |      |     |      |      |     |      |      |     |      |      |     |      |      |     |      |      |     |      |      |     |      |      |     |      |      |     |      |      |     |      |      |     |      |      |     |      |      |     |      |      |     |      |      |     |      |      |     |      |      |     |      |      |     |      |      |     |      |      |     |      |      |     |      |      |     |      |      |     |      |      |     |      |      |     |      |      |     |      |      |     |      |      |     |      |      |     |      |      |     |      |      |     |      |      |     |      |      |     |      |      |     |      |      |     |      |      |     |      |      |     |      |      |  |
| ENSG0000016328.12  | 2.2453359  | -0.564737  | 6.87E-16  | 3.45E-15   | 0.03  | 0.01   | 0.11   | GRF155  | G-protein-coupled receptor 155                               |                                                        | chr6                                                                               | protein_coding |                |      |      |     |      |      |     |      |      |     |      |      |     |      |      |     |      |      |     |      |      |     |      |      |     |      |      |     |      |      |     |      |      |     |      |      |     |      |      |     |      |      |     |      |      |     |      |      |     |      |      |     |      |      |     |      |      |     |      |      |     |      |      |     |      |      |     |      |      |     |      |      |     |      |      |     |      |      |     |      |      |     |      |      |     |      |      |     |      |      |     |      |      |     |      |      |     |      |      |     |      |      |     |      |      |     |      |      |     |      |      |     |      |      |     |      |      |     |      |      |     |      |      |     |      |      |     |      |      |     |      |      |     |      |      |     |      |      |     |      |      |     |      |      |     |      |      |     |      |      |     |      |      |     |      |      |     |      |      |     |      |      |     |      |      |     |      |      |     |      |      |     |      |      |     |      |      |     |      |      |     |      |      |     |      |      |     |      |      |     |      |      |     |      |      |     |      |      |     |      |      |     |      |      |     |      |      |     |      |      |     |      |      |     |      |      |     |      |      |     |      |      |     |      |      |     |      |      |     |      |      |     |      |      |     |      |      |     |      |      |     |      |      |     |      |      |     |      |      |     |      |      |     |      |      |     |      |      |     |      |      |     |      |      |     |      |      |     |      |      |     |      |      |     |      |      |     |      |      |     |      |      |     |      |      |     |      |      |     |      |      |     |      |      |     |      |      |     |      |      |     |      |      |     |      |      |     |      |      |     |      |      |     |      |      |     |      |      |     |      |      |     |      |      |     |      |      |     |      |      |     |      |      |     |      |      |     |      |      |     |      |      |     |      |      |     |      |      |     |      |      |     |      |      |     |      |      |     |      |      |     |      |      |     |      |      |     |      |      |     |      |      |     |      |      |     |      |      |     |      |      |     |      |      |     |      |      |     |      |      |     |      |      |     |      |      |     |      |      |     |      |      |     |      |      |     |      |      |     |      |      |     |      |      |  |
| ENSG0000016328.12  | 0.28873449 | 2.1048539  | 0.000205  | 0.0001451  | 0.31  | 0.33   | 0.04   | 0       | 0.12 CIB-SEK2.2                                              |                                                        | chr16                                                                              | protein_coding |                |      |      |     |      |      |     |      |      |     |      |      |     |      |      |     |      |      |     |      |      |     |      |      |     |      |      |     |      |      |     |      |      |     |      |      |     |      |      |     |      |      |     |      |      |     |      |      |     |      |      |     |      |      |     |      |      |     |      |      |     |      |      |     |      |      |     |      |      |     |      |      |     |      |      |     |      |      |     |      |      |     |      |      |     |      |      |     |      |      |     |      |      |     |      |      |     |      |      |     |      |      |     |      |      |     |      |      |     |      |      |     |      |      |     |      |      |     |      |      |     |      |      |     |      |      |     |      |      |     |      |      |     |      |      |     |      |      |     |      |      |     |      |      |     |      |      |     |      |      |     |      |      |     |      |      |     |      |      |     |      |      |     |      |      |     |      |      |     |      |      |     |      |      |     |      |      |     |      |      |     |      |      |     |      |      |     |      |      |     |      |      |     |      |      |     |      |      |     |      |      |     |      |      |     |      |      |     |      |      |     |      |      |     |      |      |     |      |      |     |      |      |     |      |      |     |      |      |     |      |      |     |      |      |     |      |      |     |      |      |     |      |      |     |      |      |     |      |      |     |      |      |     |      |      |     |      |      |     |      |      |     |      |      |     |      |      |     |      |      |     |      |      |     |      |      |     |      |      |     |      |      |     |      |      |     |      |      |     |      |      |     |      |      |     |      |      |     |      |      |     |      |      |     |      |      |     |      |      |     |      |      |     |      |      |     |      |      |     |      |      |     |      |      |     |      |      |     |      |      |     |      |      |     |      |      |     |      |      |     |      |      |     |      |      |     |      |      |     |      |      |     |      |      |     |      |      |     |      |      |     |      |      |     |      |      |     |      |      |     |      |      |     |      |      |     |      |      |     |      |      |     |      |      |     |      |      |     |      |      |     |      |      |     |      |      |     |      |      |     |      |      |     |      |      |     |      |      |     |      |      |     |      |      |  |
| ENSG0000026010.1   | 2.202016   | -0.892103  | 6.55E-06  | 3.29E-05   | 0.17  | 0.49   | 0.13   | 0.08    | GATA6-AS1                                                    | GATA6 antisense RNA 1 (head to head)                   | chr18                                                                              | lincRNA        |                |      |      |     |      |      |     |      |      |     |      |      |     |      |      |     |      |      |     |      |      |     |      |      |     |      |      |     |      |      |     |      |      |     |      |      |     |      |      |     |      |      |     |      |      |     |      |      |     |      |      |     |      |      |     |      |      |     |      |      |     |      |      |     |      |      |     |      |      |     |      |      |     |      |      |     |      |      |     |      |      |     |      |      |     |      |      |     |      |      |     |      |      |     |      |      |     |      |      |     |      |      |     |      |      |     |      |      |     |      |      |     |      |      |     |      |      |     |      |      |     |      |      |     |      |      |     |      |      |     |      |      |     |      |      |     |      |      |     |      |      |     |      |      |     |      |      |     |      |      |     |      |      |     |      |      |     |      |      |     |      |      |     |      |      |     |      |      |     |      |      |     |      |      |     |      |      |     |      |      |     |      |      |     |      |      |     |      |      |     |      |      |     |      |      |     |      |      |     |      |      |     |      |      |     |      |      |     |      |      |     |      |      |     |      |      |     |      |      |     |      |      |     |      |      |     |      |      |     |      |      |     |      |      |     |      |      |     |      |      |     |      |      |     |      |      |     |      |      |     |      |      |     |      |      |     |      |      |     |      |      |     |      |      |     |      |      |     |      |      |     |      |      |     |      |      |     |      |      |     |      |      |     |      |      |     |      |      |     |      |      |     |      |      |     |      |      |     |      |      |     |      |      |     |      |      |     |      |      |     |      |      |     |      |      |     |      |      |     |      |      |     |      |      |     |      |      |     |      |      |     |      |      |     |      |      |     |      |      |     |      |      |     |      |      |     |      |      |     |      |      |     |      |      |     |      |      |     |      |      |     |      |      |     |      |      |     |      |      |     |      |      |     |      |      |     |      |      |     |      |      |     |      |      |     |      |      |     |      |      |     |      |      |     |      |      |     |      |      |     |      |      |     |      |      |     |      |      |     |      |      |     |      |      |  |
| ENSG0000008958.16  | 1.2402823  | -1.091503  | 0.0003642 | 0.0013073  | 0.09  | 0.13   | 0.3    | 0.04    | CTMY1                                                        | CKI-like MARVEL transmembrane domain containing 1      | chr18                                                                              | protein_coding |                |      |      |     |      |      |     |      |      |     |      |      |     |      |      |     |      |      |     |      |      |     |      |      |     |      |      |     |      |      |     |      |      |     |      |      |     |      |      |     |      |      |     |      |      |     |      |      |     |      |      |     |      |      |     |      |      |     |      |      |     |      |      |     |      |      |     |      |      |     |      |      |     |      |      |     |      |      |     |      |      |     |      |      |     |      |      |     |      |      |     |      |      |     |      |      |     |      |      |     |      |      |     |      |      |     |      |      |     |      |      |     |      |      |     |      |      |     |      |      |     |      |      |     |      |      |     |      |      |     |      |      |     |      |      |     |      |      |     |      |      |     |      |      |     |      |      |     |      |      |     |      |      |     |      |      |     |      |      |     |      |      |     |      |      |     |      |      |     |      |      |     |      |      |     |      |      |     |      |      |     |      |      |     |      |      |     |      |      |     |      |      |     |      |      |     |      |      |     |      |      |     |      |      |     |      |      |     |      |      |     |      |      |     |      |      |     |      |      |     |      |      |     |      |      |     |      |      |     |      |      |     |      |      |     |      |      |     |      |      |     |      |      |     |      |      |     |      |      |     |      |      |     |      |      |     |      |      |     |      |      |     |      |      |     |      |      |     |      |      |     |      |      |     |      |      |     |      |      |     |      |      |     |      |      |     |      |      |     |      |      |     |      |      |     |      |      |     |      |      |     |      |      |     |      |      |     |      |      |     |      |      |     |      |      |     |      |      |     |      |      |     |      |      |     |      |      |     |      |      |     |      |      |     |      |      |     |      |      |     |      |      |     |      |      |     |      |      |     |      |      |     |      |      |     |      |      |     |      |      |     |      |      |     |      |      |     |      |      |     |      |      |     |      |      |     |      |      |     |      |      |     |      |      |     |      |      |     |      |      |     |      |      |     |      |      |     |      |      |     |      |      |     |      |      |     |      |      |     |      |      |     |      |      |  |
| ENSG0000014833.11  | 0.0001451  | 0.0001451  | 0.0001451 | 0.0001451  | 0.31  | 0.33   | 0.04   | 0       | 0.09 RPOB                                                    | ribosomal protein L22                                  | chr18                                                                              | antisense      |                |      |      |     |      |      |     |      |      |     |      |      |     |      |      |     |      |      |     |      |      |     |      |      |     |      |      |     |      |      |     |      |      |     |      |      |     |      |      |     |      |      |     |      |      |     |      |      |     |      |      |     |      |      |     |      |      |     |      |      |     |      |      |     |      |      |     |      |      |     |      |      |     |      |      |     |      |      |     |      |      |     |      |      |     |      |      |     |      |      |     |      |      |     |      |      |     |      |      |     |      |      |     |      |      |     |      |      |     |      |      |     |      |      |     |      |      |     |      |      |     |      |      |     |      |      |     |      |      |     |      |      |     |      |      |     |      |      |     |      |      |     |      |      |     |      |      |     |      |      |     |      |      |     |      |      |     |      |      |     |      |      |     |      |      |     |      |      |     |      |      |     |      |      |     |      |      |     |      |      |     |      |      |     |      |      |     |      |      |     |      |      |     |      |      |     |      |      |     |      |      |     |      |      |     |      |      |     |      |      |     |      |      |     |      |      |     |      |      |     |      |      |     |      |      |     |      |      |     |      |      |     |      |      |     |      |      |     |      |      |     |      |      |     |      |      |     |      |      |     |      |      |     |      |      |     |      |      |     |      |      |     |      |      |     |      |      |     |      |      |     |      |      |     |      |      |     |      |      |     |      |      |     |      |      |     |      |      |     |      |      |     |      |      |     |      |      |     |      |      |     |      |      |     |      |      |     |      |      |     |      |      |     |      |      |     |      |      |     |      |      |     |      |      |     |      |      |     |      |      |     |      |      |     |      |      |     |      |      |     |      |      |     |      |      |     |      |      |     |      |      |     |      |      |     |      |      |     |      |      |     |      |      |     |      |      |     |      |      |     |      |      |     |      |      |     |      |      |     |      |      |     |      |      |     |      |      |     |      |      |     |      |      |     |      |      |     |      |      |     |      |      |     |      |      |     |      |      |     |      |      |     |      |      |  |
| ENSG00000261094.2  | 1.36148816 | 1.6265084  | 1.25E-05  | 5.96E-05   | 0.05  | 0.03   | 0.19   | 0       | 0.13 RPI1-3550.1                                             |                                                        | chr9                                                                               | sense_intronic |                |      |      |     |      |      |     |      |      |     |      |      |     |      |      |     |      |      |     |      |      |     |      |      |     |      |      |     |      |      |     |      |      |     |      |      |     |      |      |     |      |      |     |      |      |     |      |      |     |      |      |     |      |      |     |      |      |     |      |      |     |      |      |     |      |      |     |      |      |     |      |      |     |      |      |     |      |      |     |      |      |     |      |      |     |      |      |     |      |      |     |      |      |     |      |      |     |      |      |     |      |      |     |      |      |     |      |      |     |      |      |     |      |      |     |      |      |     |      |      |     |      |      |     |      |      |     |      |      |     |      |      |     |      |      |     |      |      |     |      |      |     |      |      |     |      |      |     |      |      |     |      |      |     |      |      |     |      |      |     |      |      |     |      |      |     |      |      |     |      |      |     |      |      |     |      |      |     |      |      |     |      |      |     |      |      |     |      |      |     |      |      |     |      |      |     |      |      |     |      |      |     |      |      |     |      |      |     |      |      |     |      |      |     |      |      |     |      |      |     |      |      |     |      |      |     |      |      |     |      |      |     |      |      |     |      |      |     |      |      |     |      |      |     |      |      |     |      |      |     |      |      |     |      |      |     |      |      |     |      |      |     |      |      |     |      |      |     |      |      |     |      |      |     |      |      |     |      |      |     |      |      |     |      |      |     |      |      |     |      |      |     |      |      |     |      |      |     |      |      |     |      |      |     |      |      |     |      |      |     |      |      |     |      |      |     |      |      |     |      |      |     |      |      |     |      |      |     |      |      |     |      |      |     |      |      |     |      |      |     |      |      |     |      |      |     |      |      |     |      |      |     |      |      |     |      |      |     |      |      |     |      |      |     |      |      |     |      |      |     |      |      |     |      |      |     |      |      |     |      |      |     |      |      |     |      |      |     |      |      |     |      |      |     |      |      |     |      |      |     |      |      |     |      |      |     |      |      |     |      |      |     |      |      |  |
| ENSG0000010958.10  | -2.291463  | 4.589848   | 3.42E-11  | 3.0E-13    | 18.21 | 17.6   | 0.46   | 5.3     | STX14                                                        | tetraspanin A1 (bran)                                  | chr9                                                                               | antisense      |                |      |      |     |      |      |     |      |      |     |      |      |     |      |      |     |      |      |     |      |      |     |      |      |     |      |      |     |      |      |     |      |      |     |      |      |     |      |      |     |      |      |     |      |      |     |      |      |     |      |      |     |      |      |     |      |      |     |      |      |     |      |      |     |      |      |     |      |      |     |      |      |     |      |      |     |      |      |     |      |      |     |      |      |     |      |      |     |      |      |     |      |      |     |      |      |     |      |      |     |      |      |     |      |      |     |      |      |     |      |      |     |      |      |     |      |      |     |      |      |     |      |      |     |      |      |     |      |      |     |      |      |     |      |      |     |      |      |     |      |      |     |      |      |     |      |      |     |      |      |     |      |      |     |      |      |     |      |      |     |      |      |     |      |      |     |      |      |     |      |      |     |      |      |     |      |      |     |      |      |     |      |      |     |      |      |     |      |      |     |      |      |     |      |      |     |      |      |     |      |      |     |      |      |     |      |      |     |      |      |     |      |      |     |      |      |     |      |      |     |      |      |     |      |      |     |      |      |     |      |      |     |      |      |     |      |      |     |      |      |     |      |      |     |      |      |     |      |      |     |      |      |     |      |      |     |      |      |     |      |      |     |      |      |     |      |      |     |      |      |     |      |      |     |      |      |     |      |      |     |      |      |     |      |      |     |      |      |     |      |      |     |      |      |     |      |      |     |      |      |     |      |      |     |      |      |     |      |      |     |      |      |     |      |      |     |      |      |     |      |      |     |      |      |     |      |      |     |      |      |     |      |      |     |      |      |     |      |      |     |      |      |     |      |      |     |      |      |     |      |      |     |      |      |     |      |      |     |      |      |     |      |      |     |      |      |     |      |      |     |      |      |     |      |      |     |      |      |     |      |      |     |      |      |     |      |      |     |      |      |     |      |      |     |      |      |     |      |      |     |      |      |     |      |      |     |      |      |     |      |      |     |      |      |  |
| ENSG00000244016.6  | 1.5080752  | -0.3971129 | 0.0005464 | 0.00179394 | 0.13  | 0.21   | 0.08   | 0.1     | UNC101.1                                                     | long intergenic non-protein coding RNA 1011            | chr10                                                                              | lincRNA        |                |      |      |     |      |      |     |      |      |     |      |      |     |      |      |     |      |      |     |      |      |     |      |      |     |      |      |     |      |      |     |      |      |     |      |      |     |      |      |     |      |      |     |      |      |     |      |      |     |      |      |     |      |      |     |      |      |     |      |      |     |      |      |     |      |      |     |      |      |     |      |      |     |      |      |     |      |      |     |      |      |     |      |      |     |      |      |     |      |      |     |      |      |     |      |      |     |      |      |     |      |      |     |      |      |     |      |      |     |      |      |     |      |      |     |      |      |     |      |      |     |      |      |     |      |      |     |      |      |     |      |      |     |      |      |     |      |      |     |      |      |     |      |      |     |      |      |     |      |      |     |      |      |     |      |      |     |      |      |     |      |      |     |      |      |     |      |      |     |      |      |     |      |      |     |      |      |     |      |      |     |      |      |     |      |      |     |      |      |     |      |      |     |      |      |     |      |      |     |      |      |     |      |      |     |      |      |     |      |      |     |      |      |     |      |      |     |      |      |     |      |      |     |      |      |     |      |      |     |      |      |     |      |      |     |      |      |     |      |      |     |      |      |     |      |      |     |      |      |     |      |      |     |      |      |     |      |      |     |      |      |     |      |      |     |      |      |     |      |      |     |      |      |     |      |      |     |      |      |     |      |      |     |      |      |     |      |      |     |      |      |     |      |      |     |      |      |     |      |      |     |      |      |     |      |      |     |      |      |     |      |      |     |      |      |     |      |      |     |      |      |     |      |      |     |      |      |     |      |      |     |      |      |     |      |      |     |      |      |     |      |      |     |      |      |     |      |      |     |      |      |     |      |      |     |      |      |     |      |      |     |      |      |     |      |      |     |      |      |     |      |      |     |      |      |     |      |      |     |      |      |     |      |      |     |      |      |     |      |      |     |      |      |     |      |      |     |      |      |     |      |      |     |      |      |     |      |      |     |      |      |     |      |      |  |
| ENSG00000090529.10 | 0.3038206  | 1.9413036  | 1.27E-17  | 3.40E-16   | 0.19  | 0.12   | 1.26   | 218     | TMEM38B                                                      | transmembrane protein 38B                              | chr10                                                                              | protein_coding |                |      |      |     |      |      |     |      |      |     |      |      |     |      |      |     |      |      |     |      |      |     |      |      |     |      |      |     |      |      |     |      |      |     |      |      |     |      |      |     |      |      |     |      |      |     |      |      |     |      |      |     |      |      |     |      |      |     |      |      |     |      |      |     |      |      |     |      |      |     |      |      |     |      |      |     |      |      |     |      |      |     |      |      |     |      |      |     |      |      |     |      |      |     |      |      |     |      |      |     |      |      |     |      |      |     |      |      |     |      |      |     |      |      |     |      |      |     |      |      |     |      |      |     |      |      |     |      |      |     |      |      |     |      |      |     |      |      |     |      |      |     |      |      |     |      |      |     |      |      |     |      |      |     |      |      |     |      |      |     |      |      |     |      |      |     |      |      |     |      |      |     |      |      |     |      |      |     |      |      |     |      |      |     |      |      |     |      |      |     |      |      |     |      |      |     |      |      |     |      |      |     |      |      |     |      |      |     |      |      |     |      |      |     |      |      |     |      |      |     |      |      |     |      |      |     |      |      |     |      |      |     |      |      |     |      |      |     |      |      |     |      |      |     |      |      |     |      |      |     |      |      |     |      |      |     |      |      |     |      |      |     |      |      |     |      |      |     |      |      |     |      |      |     |      |      |     |      |      |     |      |      |     |      |      |     |      |      |     |      |      |     |      |      |     |      |      |     |      |      |     |      |      |     |      |      |     |      |      |     |      |      |     |      |      |     |      |      |     |      |      |     |      |      |     |      |      |     |      |      |     |      |      |     |      |      |     |      |      |     |      |      |     |      |      |     |      |      |     |      |      |     |      |      |     |      |      |     |      |      |     |      |      |     |      |      |     |      |      |     |      |      |     |      |      |     |      |      |     |      |      |     |      |      |     |      |      |     |      |      |     |      |      |     |      |      |     |      |      |     |      |      |     |      |      |     |      |      |     |      |      |     |      |      |  |
| ENSG00000136619.9  | 1.0001701  | 0.0001451  | 0.0001451 | 0.0001451  | 0.31  | 0.33   | 0.04   | 0       | 27 CDGDBS                                                    | coiled-coil domain containing 27                       | chr10                                                                              | protein_coding |                |      |      |     |      |      |     |      |      |     |      |      |     |      |      |     |      |      |     |      |      |     |      |      |     |      |      |     |      |      |     |      |      |     |      |      |     |      |      |     |      |      |     |      |      |     |      |      |     |      |      |     |      |      |     |      |      |     |      |      |     |      |      |     |      |      |     |      |      |     |      |      |     |      |      |     |      |      |     |      |      |     |      |      |     |      |      |     |      |      |     |      |      |     |      |      |     |      |      |     |      |      |     |      |      |     |      |      |     |      |      |     |      |      |     |      |      |     |      |      |     |      |      |     |      |      |     |      |      |     |      |      |     |      |      |     |      |      |     |      |      |     |      |      |     |      |      |     |      |      |     |      |      |     |      |      |     |      |      |     |      |      |     |      |      |     |      |      |     |      |      |     |      |      |     |      |      |     |      |      |     |      |      |     |      |      |     |      |      |     |      |      |     |      |      |     |      |      |     |      |      |     |      |      |     |      |      |     |      |      |     |      |      |     |      |      |     |      |      |     |      |      |     |      |      |     |      |      |     |      |      |     |      |      |     |      |      |     |      |      |     |      |      |     |      |      |     |      |      |     |      |      |     |      |      |     |      |      |     |      |      |     |      |      |     |      |      |     |      |      |     |      |      |     |      |      |     |      |      |     |      |      |     |      |      |     |      |      |     |      |      |     |      |      |     |      |      |     |      |      |     |      |      |     |      |      |     |      |      |     |      |      |     |      |      |     |      |      |     |      |      |     |      |      |     |      |      |     |      |      |     |      |      |     |      |      |     |      |      |     |      |      |     |      |      |     |      |      |     |      |      |     |      |      |     |      |      |     |      |      |     |      |      |     |      |      |     |      |      |     |      |      |     |      |      |     |      |      |     |      |      |     |      |      |     |      |      |     |      |      |     |      |      |     |      |      |     |      |      |     |      |      |     |      |      |     |      |      |     |      |      |     |      |      |  |
| ENSG0000019862.11  | 4.17582035 | 4.65661763 | 1.78E-35  | 1.07E-33   | 0.64  | 0.43   | 0.04   | 0.17    | 1529 PAPSS2                                                  | 3'-phosphoadenosine 5'-phosphosulfate synthase 2       | chr9                                                                               | protein_coding |                |      |      |     |      |      |     |      |      |     |      |      |     |      |      |     |      |      |     |      |      |     |      |      |     |      |      |     |      |      |     |      |      |     |      |      |     |      |      |     |      |      |     |      |      |     |      |      |     |      |      |     |      |      |     |      |      |     |      |      |     |      |      |     |      |      |     |      |      |     |      |      |     |      |      |     |      |      |     |      |      |     |      |      |     |      |      |     |      |      |     |      |      |     |      |      |     |      |      |     |      |      |     |      |      |     |      |      |     |      |      |     |      |      |     |      |      |     |      |      |     |      |      |     |      |      |     |      |      |     |      |      |     |      |      |     |      |      |     |      |      |     |      |      |     |      |      |     |      |      |     |      |      |     |      |      |     |      |      |     |      |      |     |      |      |     |      |      |     |      |      |     |      |      |     |      |      |     |      |      |     |      |      |     |      |      |     |      |      |     |      |      |     |      |      |     |      |      |     |      |      |     |      |      |     |      |      |     |      |      |     |      |      |     |      |      |     |      |      |     |      |      |     |      |      |     |      |      |     |      |      |     |      |      |     |      |      |     |      |      |     |      |      |     |      |      |     |      |      |     |      |      |     |      |      |     |      |      |     |      |      |     |      |      |     |      |      |     |      |      |     |      |      |     |      |      |     |      |      |     |      |      |     |      |      |     |      |      |     |      |      |     |      |      |     |      |      |     |      |      |     |      |      |     |      |      |     |      |      |     |      |      |     |      |      |     |      |      |     |      |      |     |      |      |     |      |      |     |      |      |     |      |      |     |      |      |     |      |      |     |      |      |     |      |      |     |      |      |     |      |      |     |      |      |     |      |      |     |      |      |     |      |      |     |      |      |     |      |      |     |      |      |     |      |      |     |      |      |     |      |      |     |      |      |     |      |      |     |      |      |     |      |      |     |      |      |     |      |      |     |      |      |     |      |      |     |      |      |     |      |      |     |      |      |  |
| ENSG0000018634.10  | -1.5359824 | 1.63592585 | 3.06E-06  | 1.61E-05   | 0.26  | 0.42   | 1.09   | 1.22    | NDTJ17                                                       | nucleic acid phosphatase linked motif X1-type motif 17 | chr1                                                                               | protein_coding |                |      |      |     |      |      |     |      |      |     |      |      |     |      |      |     |      |      |     |      |      |     |      |      |     |      |      |     |      |      |     |      |      |     |      |      |     |      |      |     |      |      |     |      |      |     |      |      |     |      |      |     |      |      |     |      |      |     |      |      |     |      |      |     |      |      |     |      |      |     |      |      |     |      |      |     |      |      |     |      |      |     |      |      |     |      |      |     |      |      |     |      |      |     |      |      |     |      |      |     |      |      |     |      |      |     |      |      |     |      |      |     |      |      |     |      |      |     |      |      |     |      |      |     |      |      |     |      |      |     |      |      |     |      |      |     |      |      |     |      |      |     |      |      |     |      |      |     |      |      |     |      |      |     |      |      |     |      |      |     |      |      |     |      |      |     |      |      |     |      |      |     |      |      |     |      |      |     |      |      |     |      |      |     |      |      |     |      |      |     |      |      |     |      |      |     |      |      |     |      |      |     |      |      |     |      |      |     |      |      |     |      |      |     |      |      |     |      |      |     |      |      |     |      |      |     |      |      |     |      |      |     |      |      |     |      |      |     |      |      |     |      |      |     |      |      |     |      |      |     |      |      |     |      |      |     |      |      |     |      |      |     |      |      |     |      |      |     |      |      |     |      |      |     |      |      |     |      |      |     |      |      |     |      |      |     |      |      |     |      |      |     |      |      |     |      |      |     |      |      |     |      |      |     |      |      |     |      |      |     |      |      |     |      |      |     |      |      |     |      |      |     |      |      |     |      |      |     |      |      |     |      |      |     |      |      |     |      |      |     |      |      |     |      |      |     |      |      |     |      |      |     |      |      |     |      |      |     |      |      |     |      |      |     |      |      |     |      |      |     |      |      |     |      |      |     |      |      |     |      |      |     |      |      |     |      |      |     |      |      |     |      |      |     |      |      |     |      |      |     |      |      |     |      |      |     |      |      |     |      |      |     |      |      |  |
| ENSG0000010728.9   | 1.2178783  | 0.4343893  | 0.000205  | 0.0001451  | 0.31  | 0.33   | 0.04   | 0       | 0.01 CMTK                                                    | leucin tyrosine kinase                                 | chr1                                                                               | protein_coding |                |      |      |     |      |      |     |      |      |     |      |      |     |      |      |     |      |      |     |      |      |     |      |      |     |      |      |     |      |      |     |      |      |     |      |      |     |      |      |     |      |      |     |      |      |     |      |      |     |      |      |     |      |      |     |      |      |     |      |      |     |      |      |     |      |      |     |      |      |     |      |      |     |      |      |     |      |      |     |      |      |     |      |      |     |      |      |     |      |      |     |      |      |     |      |      |     |      |      |     |      |      |     |      |      |     |      |      |     |      |      |     |      |      |     |      |      |     |      |      |     |      |      |     |      |      |     |      |      |     |      |      |     |      |      |     |      |      |     |      |      |     |      |      |     |      |      |     |      |      |     |      |      |     |      |      |     |      |      |     |      |      |     |      |      |     |      |      |     |      |      |     |      |      |     |      |      |     |      |      |     |      |      |     |      |      |     |      |      |     |      |      |     |      |      |     |      |      |     |      |      |     |      |      |     |      |      |     |      |      |     |      |      |     |      |      |     |      |      |     |      |      |     |      |      |     |      |      |     |      |      |     |      |      |     |      |      |     |      |      |     |      |      |     |      |      |     |      |      |     |      |      |     |      |      |     |      |      |     |      |      |     |      |      |     |      |      |     |      |      |     |      |      |     |      |      |     |      |      |     |      |      |     |      |      |     |      |      |     |      |      |     |      |      |     |      |      |     |      |      |     |      |      |     |      |      |     |      |      |     |      |      |     |      |      |     |      |      |     |      |      |     |      |      |     |      |      |     |      |      |     |      |      |     |      |      |     |      |      |     |      |      |     |      |      |     |      |      |     |      |      |     |      |      |     |      |      |     |      |      |     |      |      |     |      |      |     |      |      |     |      |      |     |      |      |     |      |      |     |      |      |     |      |      |     |      |      |     |      |      |     |      |      |     |      |      |     |      |      |     |      |      |     |      |      |     |      |      |     |      |      |     |      |      |  |
| ENSG0000013207.13  | 1.90461429 | 3.75554574 | 6.27E-10  | 5.62E-09   | 0.34  | 0.45   | 1.38   | 2.61    | AHTK1                                                        | Aht kinase containing transcription factor 1           | chr1                                                                               | protein_coding |                |      |      |     |      |      |     |      |      |     |      |      |     |      |      |     |      |      |     |      |      |     |      |      |     |      |      |     |      |      |     |      |      |     |      |      |     |      |      |     |      |      |     |      |      |     |      |      |     |      |      |     |      |      |     |      |      |     |      |      |     |      |      |     |      |      |     |      |      |     |      |      |     |      |      |     |      |      |     |      |      |     |      |      |     |      |      |     |      |      |     |      |      |     |      |      |     |      |      |     |      |      |     |      |      |     |      |      |     |      |      |     |      |      |     |      |      |     |      |      |     |      |      |     |      |      |     |      |      |     |      |      |     |      |      |     |      |      |     |      |      |     |      |      |     |      |      |     |      |      |     |      |      |     |      |      |     |      |      |     |      |      |     |      |      |     |      |      |     |      |      |     |      |      |     |      |      |     |      |      |     |      |      |     |      |      |     |      |      |     |      |      |     |      |      |     |      |      |     |      |      |     |      |      |     |      |      |     |      |      |     |      |      |     |      |      |     |      |      |     |      |      |     |      |      |     |      |      |     |      |      |     |      |      |     |      |      |     |      |      |     |      |      |     |      |      |     |      |      |     |      |      |     |      |      |     |      |      |     |      |      |     |      |      |     |      |      |     |      |      |     |      |      |     |      |      |     |      |      |     |      |      |     |      |      |     |      |      |     |      |      |     |      |      |     |      |      |     |      |      |     |      |      |     |      |      |     |      |      |     |      |      |     |      |      |     |      |      |     |      |      |     |      |      |     |      |      |     |      |      |     |      |      |     |      |      |     |      |      |     |      |      |     |      |      |     |      |      |     |      |      |     |      |      |     |      |      |     |      |      |     |      |      |     |      |      |     |      |      |     |      |      |     |      |      |     |      |      |     |      |      |     |      |      |     |      |      |     |      |      |     |      |      |     |      |      |     |      |      |     |      |      |     |      |      |     |      |      |     |      |      |     |      |      |  |
| ENSG0000011998.13  | 1.7171126  | 3.5247193  | 5.10E-06  | 6.20E-05   | 0.81  | 0.89   | 2.24   | 3.67    | ELT2                                                         | elongation factor, RNA polymerase II, 2                | chr5                                                                               | protein_coding |                |      |      |     |      |      |     |      |      |     |      |      |     |      |      |     |      |      |     |      |      |     |      |      |     |      |      |     |      |      |     |      |      |     |      |      |     |      |      |     |      |      |     |      |      |     |      |      |     |      |      |     |      |      |     |      |      |     |      |      |     |      |      |     |      |      |     |      |      |     |      |      |     |      |      |     |      |      |     |      |      |     |      |      |     |      |      |     |      |      |     |      |      |     |      |      |     |      |      |     |      |      |     |      |      |     |      |      |     |      |      |     |      |      |     |      |      |     |      |      |     |      |      |     |      |      |     |      |      |     |      |      |     |      |      |     |      |      |     |      |      |     |      |      |     |      |      |     |      |      |     |      |      |     |      |      |     |      |      |     |      |      |     |      |      |     |      |      |     |      |      |     |      |      |     |      |      |     |      |      |     |      |      |     |      |      |     |      |      |     |      |      |     |      |      |     |      |      |     |      |      |     |      |      |     |      |      |     |      |      |     |      |      |     |      |      |     |      |      |     |      |      |     |      |      |     |      |      |     |      |      |     |      |      |     |      |      |     |      |      |     |      |      |     |      |      |     |      |      |     |      |      |     |      |      |     |      |      |     |      |      |     |      |      |     |      |      |     |      |      |     |      |      |     |      |      |     |      |      |     |      |      |     |      |      |     |      |      |     |      |      |     |      |      |     |      |      |     |      |      |     |      |      |     |      |      |     |      |      |     |      |      |     |      |      |     |      |      |     |      |      |     |      |      |     |      |      |     |      |      |     |      |      |     |      |      |     |      |      |     |      |      |     |      |      |     |      |      |     |      |      |     |      |      |     |      |      |     |      |      |     |      |      |     |      |      |     |      |      |     |      |      |     |      |      |     |      |      |     |      |      |     |      |      |     |      |      |     |      |      |     |      |      |     |      |      |     |      |      |     |      |      |     |      |      |     |      |      |     |      |      |     |      |      |  |
| ENSG0000023929.10  | 1.01085383 | 0.0003284  | 0.0003284 | 0.0003284  | 21.06 | 21.06  | 0.31   | 0.03    | 13.4                                                         | NUAK family D (C. elegans)                             | chr10                                                                              | protein_coding |                |      |      |     |      |      |     |      |      |     |      |      |     |      |      |     |      |      |     |      |      |     |      |      |     |      |      |     |      |      |     |      |      |     |      |      |     |      |      |     |      |      |     |      |      |     |      |      |     |      |      |     |      |      |     |      |      |     |      |      |     |      |      |     |      |      |     |      |      |     |      |      |     |      |      |     |      |      |     |      |      |     |      |      |     |      |      |     |      |      |     |      |      |     |      |      |     |      |      |     |      |      |     |      |      |     |      |      |     |      |      |     |      |      |     |      |      |     |      |      |     |      |      |     |      |      |     |      |      |     |      |      |     |      |      |     |      |      |     |      |      |     |      |      |     |      |      |     |      |      |     |      |      |     |      |      |     |      |      |     |      |      |     |      |      |     |      |      |     |      |      |     |      |      |     |      |      |     |      |      |     |      |      |     |      |      |     |      |      |     |      |      |     |      |      |     |      |      |     |      |      |     |      |      |     |      |      |     |      |      |     |      |      |     |      |      |     |      |      |     |      |      |     |      |      |     |      |      |     |      |      |     |      |      |     |      |      |     |      |      |     |      |      |     |      |      |     |      |      |     |      |      |     |      |      |     |      |      |     |      |      |     |      |      |     |      |      |     |      |      |     |      |      |     |      |      |     |      |      |     |      |      |     |      |      |     |      |      |     |      |      |     |      |      |     |      |      |     |      |      |     |      |      |     |      |      |     |      |      |     |      |      |     |      |      |     |      |      |     |      |      |     |      |      |     |      |      |     |      |      |     |      |      |     |      |      |     |      |      |     |      |      |     |      |      |     |      |      |     |      |      |     |      |      |     |      |      |     |      |      |     |      |      |     |      |      |     |      |      |     |      |      |     |      |      |     |      |      |     |      |      |     |      |      |     |      |      |     |      |      |     |      |      |     |      |      |     |      |      |     |      |      |     |      |      |     |      |      |     |      |      |     |      |      |  |
| ENSG0000014848.15  | -1.1339156 | 4.2987801  | 6.31E-05  | 3.10E-05   | 5.49  | 5.27   | 3.46   | FAM131A | family with sequence similarity 17, member A1                | chr10                                                  | protein_coding                                                                     |                |                |      |      |     |      |      |     |      |      |     |      |      |     |      |      |     |      |      |     |      |      |     |      |      |     |      |      |     |      |      |     |      |      |     |      |      |     |      |      |     |      |      |     |      |      |     |      |      |     |      |      |     |      |      |     |      |      |     |      |      |     |      |      |     |      |      |     |      |      |     |      |      |     |      |      |     |      |      |     |      |      |     |      |      |     |      |      |     |      |      |     |      |      |     |      |      |     |      |      |     |      |      |     |      |      |     |      |      |     |      |      |     |      |      |     |      |      |     |      |      |     |      |      |     |      |      |     |      |      |     |      |      |     |      |      |     |      |      |     |      |      |     |      |      |     |      |      |     |      |      |     |      |      |     |      |      |     |      |      |     |      |      |     |      |      |     |      |      |     |      |      |     |      |      |     |      |      |     |      |      |     |      |      |     |      |      |     |      |      |     |      |      |     |      |      |     |      |      |     |      |      |     |      |      |     |      |      |     |      |      |     |      |      |     |      |      |     |      |      |     |      |      |     |      |      |     |      |      |     |      |      |     |      |      |     |      |      |     |      |      |     |      |      |     |      |      |     |      |      |     |      |      |     |      |      |     |      |      |     |      |      |     |      |      |     |      |      |     |      |      |     |      |      |     |      |      |     |      |      |     |      |      |     |      |      |     |      |      |     |      |      |     |      |      |     |      |      |     |      |      |     |      |      |     |      |      |     |      |      |     |      |      |     |      |      |     |      |      |     |      |      |     |      |      |     |      |      |     |      |      |     |      |      |     |      |      |     |      |      |     |      |      |     |      |      |     |      |      |     |      |      |     |      |      |     |      |      |     |      |      |     |      |      |     |      |      |     |      |      |     |      |      |     |      |      |     |      |      |     |      |      |     |      |      |     |      |      |     |      |      |     |      |      |     |      |      |     |      |      |     |      |      |     |      |      |     |      |      |     |      |      |     |      |      |  |
| ENSG000001564.7    | -0.40412   | 2.8414938  | 1.95E-02  | 3.94E-09   | 0.4   | 0.96   | 0.48   | 0.96    | NUAK2                                                        | NUAK family, SNF1-like kinase 2                        | chr10                                                                              | protein_coding |                |      |      |     |      |      |     |      |      |     |      |      |     |      |      |     |      |      |     |      |      |     |      |      |     |      |      |     |      |      |     |      |      |     |      |      |     |      |      |     |      |      |     |      |      |     |      |      |     |      |      |     |      |      |     |      |      |     |      |      |     |      |      |     |      |      |     |      |      |     |      |      |     |      |      |     |      |      |     |      |      |     |      |      |     |      |      |     |      |      |     |      |      |     |      |      |     |      |      |     |      |      |     |      |      |     |      |      |     |      |      |     |      |      |     |      |      |     |      |      |     |      |      |     |      |      |     |      |      |     |      |      |     |      |      |     |      |      |     |      |      |     |      |      |     |      |      |     |      |      |     |      |      |     |      |      |     |      |      |     |      |      |     |      |      |     |      |      |     |      |      |     |      |      |     |      |      |     |      |      |     |      |      |     |      |      |     |      |      |     |      |      |     |      |      |     |      |      |     |      |      |     |      |      |     |      |      |     |      |      |     |      |      |     |      |      |     |      |      |     |      |      |     |      |      |     |      |      |     |      |      |     |      |      |     |      |      |     |      |      |     |      |      |     |      |      |     |      |      |     |      |      |     |      |      |     |      |      |     |      |      |     |      |      |     |      |      |     |      |      |     |      |      |     |      |      |     |      |      |     |      |      |     |      |      |     |      |      |     |      |      |     |      |      |     |      |      |     |      |      |     |      |      |     |      |      |     |      |      |     |      |      |     |      |      |     |      |      |     |      |      |     |      |      |     |      |      |     |      |      |     |      |      |     |      |      |     |      |      |     |      |      |     |      |      |     |      |      |     |      |      |     |      |      |     |      |      |     |      |      |     |      |      |     |      |      |     |      |      |     |      |      |     |      |      |     |      |      |     |      |      |     |      |      |     |      |      |     |      |      |     |      |      |     |      |      |     |      |      |     |      |      |     |      |      |     |      |      |     |      |      |     |      |      |  |
| ENSG000001564.7    | 1.0868145  | 0.11877    | 0.000589  | 0.0031025  | 2.23  | 2.33   | 0.41   | 0.33    | 0.94                                                         | TUBC9C                                                 | tubulin, alpha complex associated protein 5                                        | chr15          | protein_coding |      |      |     |      |      |     |      |      |     |      |      |     |      |      |     |      |      |     |      |      |     |      |      |     |      |      |     |      |      |     |      |      |     |      |      |     |      |      |     |      |      |     |      |      |     |      |      |     |      |      |     |      |      |     |      |      |     |      |      |     |      |      |     |      |      |     |      |      |     |      |      |     |      |      |     |      |      |     |      |      |     |      |      |     |      |      |     |      |      |     |      |      |     |      |      |     |      |      |     |      |      |     |      |      |     |      |      |     |      |      |     |      |      |     |      |      |     |      |      |     |      |      |     |      |      |     |      |      |     |      |      |     |      |      |     |      |      |     |      |      |     |      |      |     |      |      |     |      |      |     |      |      |     |      |      |     |      |      |     |      |      |     |      |      |     |      |      |     |      |      |     |      |      |     |      |      |     |      |      |     |      |      |     |      |      |     |      |      |     |      |      |     |      |      |     |      |      |     |      |      |     |      |      |     |      |      |     |      |      |     |      |      |     |      |      |     |      |      |     |      |      |     |      |      |     |      |      |     |      |      |     |      |      |     |      |      |     |      |      |     |      |      |     |      |      |     |      |      |     |      |      |     |      |      |     |      |      |     |      |      |     |      |      |     |      |      |     |      |      |     |      |      |     |      |      |     |      |      |     |      |      |     |      |      |     |      |      |     |      |      |     |      |      |     |      |      |     |      |      |     |      |      |     |      |      |     |      |      |     |      |      |     |      |      |     |      |      |     |      |      |     |      |      |     |      |      |     |      |      |     |      |      |     |      |      |     |      |      |     |      |      |     |      |      |     |      |      |     |      |      |     |      |      |     |      |      |     |      |      |     |      |      |     |      |      |     |      |      |     |      |      |     |      |      |     |      |      |     |      |      |     |      |      |     |      |      |     |      |      |     |      |      |     |      |      |     |      |      |     |      |      |     |      |      |     |      |      |     |      |      |     |      |      |  |
| ENSG0000011667.11  | -1.056667  | 4.6004148  | 0.000485  | 0.0007465  | 2.23  | 2.33   | 0.41   | 0.33    | 0.94                                                         | Clorf12                                                | chromosome 1 open reading frame 21                                                 | chr1           | protein_coding |      |      |     |      |      |     |      |      |     |      |      |     |      |      |     |      |      |     |      |      |     |      |      |     |      |      |     |      |      |     |      |      |     |      |      |     |      |      |     |      |      |     |      |      |     |      |      |     |      |      |     |      |      |     |      |      |     |      |      |     |      |      |     |      |      |     |      |      |     |      |      |     |      |      |     |      |      |     |      |      |     |      |      |     |      |      |     |      |      |     |      |      |     |      |      |     |      |      |     |      |      |     |      |      |     |      |      |     |      |      |     |      |      |     |      |      |     |      |      |     |      |      |     |      |      |     |      |      |     |      |      |     |      |      |     |      |      |     |      |      |     |      |      |     |      |      |     |      |      |     |      |      |     |      |      |     |      |      |     |      |      |     |      |      |     |      |      |     |      |      |     |      |      |     |      |      |     |      |      |     |      |      |     |      |      |     |      |      |     |      |      |     |      |      |     |      |      |     |      |      |     |      |      |     |      |      |     |      |      |     |      |      |     |      |      |     |      |      |     |      |      |     |      |      |     |      |      |     |      |      |     |      |      |     |      |      |     |      |      |     |      |      |     |      |      |     |      |      |     |      |      |     |      |      |     |      |      |     |      |      |     |      |      |     |      |      |     |      |      |     |      |      |     |      |      |     |      |      |     |      |      |     |      |      |     |      |      |     |      |      |     |      |      |     |      |      |     |      |      |     |      |      |     |      |      |     |      |      |     |      |      |     |      |      |     |      |      |     |      |      |     |      |      |     |      |      |     |      |      |     |      |      |     |      |      |     |      |      |     |      |      |     |      |      |     |      |      |     |      |      |     |      |      |     |      |      |     |      |      |     |      |      |     |      |      |     |      |      |     |      |      |     |      |      |     |      |      |     |      |      |     |      |      |     |      |      |     |      |      |     |      |      |     |      |      |     |      |      |     |      |      |     |      |      |     |      |      |     |      |      |     |      |      |  |
| ENSG0000014848.11  | 1.056667   | 2.4251622  | 0.000485  | 0.0007465  | 2.23  | 2.33   | 0.41   | 0.33    | 0.94                                                         | NUAK2                                                  | nucleolar X mental retardation protein interacting protein 2                       | chr1           | protein_coding |      |      |     |      |      |     |      |      |     |      |      |     |      |      |     |      |      |     |      |      |     |      |      |     |      |      |     |      |      |     |      |      |     |      |      |     |      |      |     |      |      |     |      |      |     |      |      |     |      |      |     |      |      |     |      |      |     |      |      |     |      |      |     |      |      |     |      |      |     |      |      |     |      |      |     |      |      |     |      |      |     |      |      |     |      |      |     |      |      |     |      |      |     |      |      |     |      |      |     |      |      |     |      |      |     |      |      |     |      |      |     |      |      |     |      |      |     |      |      |     |      |      |     |      |      |     |      |      |     |      |      |     |      |      |     |      |      |     |      |      |     |      |      |     |      |      |     |      |      |     |      |      |     |      |      |     |      |      |     |      |      |     |      |      |     |      |      |     |      |      |     |      |      |     |      |      |     |      |      |     |      |      |     |      |      |     |      |      |     |      |      |     |      |      |     |      |      |     |      |      |     |      |      |     |      |      |     |      |      |     |      |      |     |      |      |     |      |      |     |      |      |     |      |      |     |      |      |     |      |      |     |      |      |     |      |      |     |      |      |     |      |      |     |      |      |     |      |      |     |      |      |     |      |      |     |      |      |     |      |      |     |      |      |     |      |      |     |      |      |     |      |      |     |      |      |     |      |      |     |      |      |     |      |      |     |      |      |     |      |      |     |      |      |     |      |      |     |      |      |     |      |      |     |      |      |     |      |      |     |      |      |     |      |      |     |      |      |     |      |      |     |      |      |     |      |      |     |      |      |     |      |      |     |      |      |     |      |      |     |      |      |     |      |      |     |      |      |     |      |      |     |      |      |     |      |      |     |      |      |     |      |      |     |      |      |     |      |      |     |      |      |     |      |      |     |      |      |     |      |      |     |      |      |     |      |      |     |      |      |     |      |      |     |      |      |     |      |      |     |      |      |     |      |      |     |      |      |     |      |      |     |      |      |  |
| ENSG0000023531.1   | 2.5617133  | -2.681208  | 0.000664  | 0.0028128  | 0     | 0      | 0.08   | 0.38    | 0.33                                                         | NUAK1-753K3                                            | nuak carrier family 7 (amino acid transporter light chain, bo. + system), member 9 | chr17          | antisense      |      |      |     |      |      |     |      |      |     |      |      |     |      |      |     |      |      |     |      |      |     |      |      |     |      |      |     |      |      |     |      |      |     |      |      |     |      |      |     |      |      |     |      |      |     |      |      |     |      |      |     |      |      |     |      |      |     |      |      |     |      |      |     |      |      |     |      |      |     |      |      |     |      |      |     |      |      |     |      |      |     |      |      |     |      |      |     |      |      |     |      |      |     |      |      |     |      |      |     |      |      |     |      |      |     |      |      |     |      |      |     |      |      |     |      |      |     |      |      |     |      |      |     |      |      |     |      |      |     |      |      |     |      |      |     |      |      |     |      |      |     |      |      |     |      |      |     |      |      |     |      |      |     |      |      |     |      |      |     |      |      |     |      |      |     |      |      |     |      |      |     |      |      |     |      |      |     |      |      |     |      |      |     |      |      |     |      |      |     |      |      |     |      |      |     |      |      |     |      |      |     |      |      |     |      |      |     |      |      |     |      |      |     |      |      |     |      |      |     |      |      |     |      |      |     |      |      |     |      |      |     |      |      |     |      |      |     |      |      |     |      |      |     |      |      |     |      |      |     |      |      |     |      |      |     |      |      |     |      |      |     |      |      |     |      |      |     |      |      |     |      |      |     |      |      |     |      |      |     |      |      |     |      |      |     |      |      |     |      |      |     |      |      |     |      |      |     |      |      |     |      |      |     |      |      |     |      |      |     |      |      |     |      |      |     |      |      |     |      |      |     |      |      |     |      |      |     |      |      |     |      |      |     |      |      |     |      |      |     |      |      |     |      |      |     |      |      |     |      |      |     |      |      |     |      |      |     |      |      |     |      |      |     |      |      |     |      |      |     |      |      |     |      |      |     |      |      |     |      |      |     |      |      |     |      |      |     |      |      |     |      |      |     |      |      |     |      |      |     |      |      |     |      |      |     |      |      |     |      |      |     |      |      |  |
| ENSG00000145056.12 | -9.297468  | 3.4718413  | 5.09E-14  | 7.33E-13   | 11.33 | 12.54  | 3.35   | 2.93    | NDK2                                                         | 20 kDa dual homology 2 (Drosophila)                    | chr17                                                                              | protein_coding |                |      |      |     |      |      |     |      |      |     |      |      |     |      |      |     |      |      |     |      |      |     |      |      |     |      |      |     |      |      |     |      |      |     |      |      |     |      |      |     |      |      |     |      |      |     |      |      |     |      |      |     |      |      |     |      |      |     |      |      |     |      |      |     |      |      |     |      |      |     |      |      |     |      |      |     |      |      |     |      |      |     |      |      |     |      |      |     |      |      |     |      |      |     |      |      |     |      |      |     |      |      |     |      |      |     |      |      |     |      |      |     |      |      |     |      |      |     |      |      |     |      |      |     |      |      |     |      |      |     |      |      |     |      |      |     |      |      |     |      |      |     |      |      |     |      |      |     |      |      |     |      |      |     |      |      |     |      |      |     |      |      |     |      |      |     |      |      |     |      |      |     |      |      |     |      |      |     |      |      |     |      |      |     |      |      |     |      |      |     |      |      |     |      |      |     |      |      |     |      |      |     |      |      |     |      |      |     |      |      |     |      |      |     |      |      |     |      |      |     |      |      |     |      |      |     |      |      |     |      |      |     |      |      |     |      |      |     |      |      |     |      |      |     |      |      |     |      |      |     |      |      |     |      |      |     |      |      |     |      |      |     |      |      |     |      |      |     |      |      |     |      |      |     |      |      |     |      |      |     |      |      |     |      |      |     |      |      |     |      |      |     |      |      |     |      |      |     |      |      |     |      |      |     |      |      |     |      |      |     |      |      |     |      |      |     |      |      |     |      |      |     |      |      |     |      |      |     |      |      |     |      |      |     |      |      |     |      |      |     |      |      |     |      |      |     |      |      |     |      |      |     |      |      |     |      |      |     |      |      |     |      |      |     |      |      |     |      |      |     |      |      |     |      |      |     |      |      |     |      |      |     |      |      |     |      |      |     |      |      |     |      |      |     |      |      |     |      |      |     |      |      |     |      |      |     |      |      |     |      |      |     |      |      |  |
| ENSG000001335.3    | 1.6010778  | -0.080062  | 2.84E-06  | 2.04E-07   | 0.1   | 0.49   | 0.04   | 0.1     | 0.49                                                         | 0.49                                                   | 0.49                                                                               | 0.04           | 0.1            | 0.49 | 0.04 | 0.1 | 0.49 | 0.04 | 0.1 | 0.49 | 0.04 | 0.1 | 0.49 | 0.04 | 0.1 | 0.49 | 0.04 | 0.1 | 0.49 | 0.04 | 0.1 | 0.49 | 0.04 | 0.1 | 0.49 | 0.04 | 0.1 | 0.49 | 0.04 | 0.1 | 0.49 | 0.04 | 0.1 | 0.49 | 0.04 | 0.1 | 0.49 | 0.04 | 0.1 | 0.49 | 0.04 | 0.1 | 0.49 | 0.04 | 0.1 | 0.49 | 0.04 | 0.1 | 0.49 | 0.04 | 0.1 | 0.49 | 0.04 | 0.1 | 0.49 | 0.04 | 0.1 | 0.49 | 0.04 | 0.1 | 0.49 | 0.04 | 0.1 | 0.49 | 0.04 | 0.1 | 0.49 | 0.04 | 0.1 | 0.49 | 0.04 | 0.1 | 0.49 | 0.04 | 0.1 | 0.49 | 0.04 | 0.1 | 0.49 | 0.04 | 0.1 | 0.49 | 0.04 | 0.1 | 0.49 | 0.04 | 0.1 | 0.49 | 0.04 | 0.1 | 0.49 | 0.04 | 0.1 | 0.49 | 0.04 | 0.1 | 0.49 | 0.04 | 0.1 | 0.49 | 0.04 | 0.1 | 0.49 | 0.04 | 0.1 | 0.49 | 0.04 | 0.1 | 0.49 | 0.04 | 0.1 | 0.49 | 0.04 | 0.1 | 0.49 | 0.04 | 0.1 | 0.49 | 0.04 | 0.1 | 0.49 | 0.04 | 0.1 | 0.49 | 0.04 | 0.1 | 0.49 | 0.04 | 0.1 | 0.49 | 0.04 | 0.1 | 0.49 | 0.04 | 0.1 | 0.49 | 0.04 | 0.1 | 0.49 | 0.04 | 0.1 | 0.49 | 0.04 | 0.1 | 0.49 | 0.04 | 0.1 | 0.49 | 0.04 | 0.1 | 0.49 | 0.04 | 0.1 | 0.49 | 0.04 | 0.1 | 0.49 | 0.04 | 0.1 | 0.49 | 0.04 | 0.1 | 0.49 | 0.04 | 0.1 | 0.49 | 0.04 | 0.1 | 0.49 | 0.04 | 0.1 | 0.49 | 0.04 | 0.1 | 0.49 | 0.04 | 0.1 | 0.49 | 0.04 | 0.1 | 0.49 | 0.04 | 0.1 | 0.49 | 0.04 | 0.1 | 0.49 | 0.04 | 0.1 | 0.49 | 0.04 | 0.1 | 0.49 | 0.04 | 0.1 | 0.49 | 0.04 | 0.1 | 0.49 | 0.04 | 0.1 | 0.49 | 0.04 | 0.1 | 0.49 | 0.04 | 0.1 | 0.49 | 0.04 | 0.1 | 0.49 | 0.04 | 0.1 | 0.49 | 0.04 | 0.1 | 0.49 | 0.04 | 0.1 | 0.49 | 0.04 | 0.1 | 0.49 | 0.04 | 0.1 | 0.49 | 0.04 | 0.1 | 0.49 | 0.04 | 0.1 | 0.49 | 0.04 | 0.1 | 0.49 | 0.04 | 0.1 | 0.49 | 0.04 | 0.1 | 0.49 | 0.04 | 0.1 | 0.49 | 0.04 | 0.1 | 0.49 | 0.04 | 0.1 | 0.49 | 0.04 | 0.1 | 0.49 | 0.04 | 0.1 | 0.49 | 0.04 | 0.1 | 0.49 | 0.04 | 0.1 | 0.49 | 0.04 | 0.1 | 0.49 | 0.04 | 0.1 | 0.49 | 0.04 | 0.1 | 0.49 | 0.04 | 0.1 | 0.49 | 0.04 | 0.1 | 0.49 | 0.04 | 0.1 | 0.49 | 0.04 | 0.1 | 0.49 | 0.04 | 0.1 | 0.49 | 0.04 | 0.1 | 0.49 | 0.04 | 0.1 | 0.49 | 0.04 | 0.1 | 0.49 | 0.04 | 0.1 | 0.49 | 0.04 | 0.1 | 0.49 | 0.04 | 0.1 | 0.49 | 0.04 | 0.1 | 0.49 | 0.04 | 0.1 | 0.49 | 0.04 | 0.1 | 0.49 | 0.04 | 0.1 | 0.49 | 0.04 | 0.1 | 0.49 | 0.04 | 0.1 | 0.49 | 0.04 | 0.1 | 0.49 | 0.04 | 0.1 | 0.49 | 0.04 | 0.1 | 0.49 | 0.04 | 0.1 | 0.49 | 0.04 | 0.1 | 0.49 | 0.04 | 0.1 | 0.49 | 0.04 | 0.1 | 0.49 | 0.04 | 0.1 | 0.49 | 0.04 | 0.1 | 0.49 | 0.04 | 0.1 | 0.49 | 0.04 | 0.1 | 0.49 | 0.04 | 0.1 | 0.49 | 0.04 | 0.1 | 0.49 | 0.04 | 0.1 | 0.49 | 0.04 | 0.1 | 0.49 | 0.04 | 0.1 | 0.49 | 0.04 | 0.1 | 0.49 | 0.04 | 0.1 | 0.49 | 0.04 | 0.1 | 0.49 | 0.04 | 0.1 | 0.49 | 0.04 | 0.1 | 0.49 | 0.04 | 0.1 | 0.49 | 0.04 | 0.1 | 0.49 | 0.04 | 0.1 | 0.49 | 0.04 | 0.1 | 0.49 | 0.04 | 0.1 | 0.49 | 0.04 | 0.1 | 0.49 | 0.04 | 0.1 | 0.49 | 0.04 | 0.1 | 0.49 | 0.04 | 0.1 | 0.49 | 0.04 | 0.1 | 0.49 | 0.04 |  |

[illegible]

|                    |            |            |            |            |           |           |           |       |      |                         |       |                |
|--------------------|------------|------------|------------|------------|-----------|-----------|-----------|-------|------|-------------------------|-------|----------------|
| ENSG00000238280.1  | -2.5285753 | -0.2137124 | 1.88E-08   | 1.38E-07   | 2.29      | 0         | 115       | 0.29  | 0.49 | LA16c-325D --           | chr16 | lncRNA         |
| ENSG0000012845.12  | 511722729  | -1.189882  | 2.21E-11   | 3.10E-10   | 0.31      | 0         | 189       | 0.29  | 0.44 | KOXC01                  | chr16 | protein_coding |
| ENSG0000012572.11  | 297270003  | -0.3598551 | 6.42E-09   | 5.0E-07    | 0.01      | 0         | 0.29      | 0.29  | 0.29 | GPCPD1                  | chr16 | protein_coding |
| ENSG00000269815.1  | 196482321  | -1.6099842 | 0.0034584  | 0.0100343  | 0.21      | 0.11      | 0.09      | 0.87  | 0.27 | CTD-227B11 --           | chr16 | sense_intronic |
| ENSG0000024660.8   | 50181285   | -1.968177  | 0.0012805  | 0.0004222  | 0.3       | 0         | 0.05      | 0.3   | 0.29 | ZNF487                  | chr16 | protein_coding |
| ENSG00000260140.8  | 347176115  | 0.0592193  | 1.88E-12   | 2.9E-11    | 0.003     | 0.07      | 0.75      | 0.69  | 0.75 | TMEM191C                | chr22 | lncRNA         |
| ENSG00000164530.12 | 504175262  | -2.962674  | 0.010455   | 0.0258272  | 0         | 0         | 0         | 0.11  | 0.16 | peptidase inhibitor 18  | chr6  | protein_coding |
| ENSG0000012942.12  | 301478002  | 0.0000002  | 2.21E-13   | 2.98E-12   | 0.21      | 0.08      | 0.189     | 2.09  | 0.08 | MTUS15                  | chr16 | protein_coding |
| ENSG0000016984.12  | 159884125  | 3.8473828  | 1.03E-07   | 6.90E-07   | 1.49      | 1.68      | 5.24      | 7.61  | 0.18 | CHRNA5                  | chr15 | protein_coding |
| ENSG0000026557.5   | 50497520   | -2.494611  | 0.0026535  | 0.0009147  | 0         | 0         | 0.01      | 0.04  | 0.01 | TRMT1                   | chr13 | protein_coding |
| ENSG0000018660.10  | 53523096   | -0.0000000 | 0.0000000  | 0.0011544  | 1.76      | 21.3      | 0.39      | 5.32  | 0.39 | GPATCH8                 | chr17 | protein_coding |
| ENSG00000242247.9  | 10527552   | 3.9674229  | 0.00041293 | 0.00146757 | 2.45      | 1.97      | 4.1       | 8.24  | 0.01 | ARFGAP3                 | chr22 | protein_coding |
| ENSG0000016388.13  | -1.1542652 | 4.5223726  | 7.79E-05   | 0.0000000  | 6.48      | 6.85      | 3.15      | 4.86  | 0.02 | RAB25A                  | chr16 | protein_coding |
| ENSG00000165280.14 | 1.245833   | 9.2247337  | 1.54E-05   | 7.23E-05   | 166.39    | 145.28    | 84.08     | 91.32 | 0.01 | VCP                     | chr16 | protein_coding |
| ENSG00000151687.13 | 57784906   | -2.5437546 | 0.0002655  | 0.0009147  | 0         | 0         | 0.04      | 0.06  | 0.04 | ANKAR                   | chr2  | protein_coding |
| ENSG0000017595.10  | 1.1012285  | 6.0426539  | 0.0004489  | 0.0000019  | 19.42     | 19.69     | 13.51     | 12.38 | 0.01 | TRAL16                  | chr16 | protein_coding |
| ENSG00000213366.11 | -3.1717913 | -2.8628854 | 0.00161562 | 0.0398166  | 0.01      | 0.05      | 0.01      | 0     | 0.01 | GSTM2                   | chr11 | protein_coding |
| ENSG00000183161.4  | -1.0186125 | 157774679  | 0.0000003  | 0.00016887 | 0.73      | 0.07      | 0.61      | 0.38  | 0.01 | FANCF                   | chr11 | protein_coding |
| ENSG00000108672.11 | 1.5773781  | 2.89301243 | 7.69E-07   | 4.57E-06   | 0.67      | 0.71      | 2.16      | 3.7   | 0.01 | DLXAG                   | chr11 | protein_coding |
| ENSG00000208273.1  | 5.06203518 | -2.9176376 | 0.0100455  | 0.0258272  | 0         | 0         | 0.08      | 0.09  | 0.01 | AF131261.1              | chr8  | protein_coding |
| ENSG0000017230.14  | 2.78292269 | 4.051474   | 9.92E-19   | 2.15E-17   | 0.26      | 0.34      | 0.27      | 3.47  | 0.01 | GOLGB1                  | chr1  | protein_coding |
| ENSG00000204634.11 | -2.0325311 | 5.21413984 | 8.60E-12   | 9.74E-11   | 11.63     | 13.79     | 0.19      | 4.58  | 0.01 | TRC1D8                  | chr1  | protein_coding |
| ENSG00000155850.7  | 106795564  | 0.69251661 | 0.0000000  | 0.0130629  | 0.07      | 0.13      | 0.15      | 0.4   | 0.01 | SLC26A2                 | chr5  | protein_coding |
| ENSG0000012546.16  | 1.9254084  | 3.7541579  | 2.76E-10   | 2.61E-09   | 0.81      | 1.22      | 3.71      | 6.72  | 0.01 | 7-Seq                   | chr7  | protein_coding |
| ENSG00000274516.1  | 521249443  | -2.9887783 | 0.0530165  | 0.0148861  | 0         | 0         | 0.05      | 0.08  | 0.01 | FAM74A6                 | chr7  | lncRNA         |
| ENSG00000109466.12 | 142296164  | 1.97637435 | 1.18E-05   | 5.64E-05   | 0.35      | 0.54      | 1.47      | 1.71  | 0.01 | KLHL2                   | chr4  | protein_coding |
| ENSG00000135457.8  | -1.0454447 | 4.93000241 | 0.0002337  | 0.00116429 | 8.68      | 9.49      | 5.52      | 6.21  | 0.01 | TCF22                   | chr12 | protein_coding |
| ENSG00000147036.10 | -8.0055183 | -0.9647791 | 7.69E-14   | 1.09E-12   | 0.09      | 0.06      | 0         | 0     | 0.01 | LANCL3                  | chrX  | protein_coding |
| ENSG00000229739.2  | -5.2026475 | -3.0371681 | 0.0100455  | 0.0258272  | 0.28      | 0         | 0         | 0     | 0.01 | RPL1-295K2              | chr1  | antisease      |
| ENSG00000102134.1  | 1.6254984  | 2.0824641  | 5.34E-07   | 3.22E-06   | 0.01      | 0.01      | 0.01      | 0.03  | 0.01 | HELPA4                  | chr12 | macro_lncRNA   |
| ENSG00000153094.20 | 1.04613817 | 3.58202745 | 0.0003426  | 0.00153724 | 0.99      | 1.07      | 2.59      | 3.11  | 0.01 | BC1L211                 | chr1  | protein_coding |
| ENSG00000184185.8  | -5.1179676 | 4.7657369  | 1.60E-47   | 1.94E-45   | 8.11      | 7.14      | 0.24      | 0.34  | 0.01 | KCNJ12                  | chr17 | protein_coding |
| ENSG00000125441.1  | 3.3959543  | -2.918118  | 0.0000000  | 0.0000000  | 0.0000000 | 0.0000000 | 0.0000000 | 0.00  | 0.00 | CTD-261611              | chr1  | antisease      |
| ENSG00000107462.12 | -1.1056046 | 1.90010545 | 0.0003761  | 0.0018693  | 0.46      | 0.78      | 0.3       | 0.46  | 0.01 | SLC24A1                 | chr15 | protein_coding |
| ENSG0000015193.13  | 1.292877   | 5.7146377  | 8.47E-06   | 4.17E-05   | 8.61      | 8.96      | 3.94      | 10.6  | 0.01 | LRP4                    | chr1  | protein_coding |
| ENSG00000205220.10 | 1.70591245 | 0.6270834  | 1.98E-08   | 1.37E-07   | 4.24      | 3.42      | 17.28     | 15.92 | 0.01 | PSMB10                  | chr1  | protein_coding |
| ENSG00000119791.13 | 1.350696   | 1.0532188  | 8.06E-05   | 0.00033163 | 0.35      | 0.3       | 0.12      | 0.22  | 0.01 | MPM2                    | chr18 | protein_coding |
| ENSG00000108297    | 1.350919   | 0.0000000  | 0.0000000  | 0.0000000  | 0.3       | 0.3       | 0.12      | 0.22  | 0.01 | WASL                    | chr1  | protein_coding |
| ENSG0000010346.16  | 8.52169697 | -0.344016  | 4.85E-17   | 9.21E-16   | 0         | 0         | 0.17      | 0.11  | 0.01 | CACNA1C                 | chr22 | protein_coding |
| ENSG00000169750.7  | -2.0766798 | 5.27042178 | 3.31E-12   | 3.92E-11   | 50.64     | 41.94     | 10.72     | 12.14 | 0.01 | RAC3                    | chr17 | protein_coding |
| ENSG00000214049.6  | 0.95544038 | 0.4002463  | 0.0000000  | 0.0000000  | 0.0000000 | 0.0000000 | 0.0000000 | 0.00  | 0.00 | UACA                    | chr19 | protein_coding |
| ENSG0000016920.7   | -1.685997  | 1.69989427 | 3.16E-07   | 1.97E-06   | 1.89      | 1.82      | 0.67      | 0.92  | 0.01 | TMEM9                   | chr17 | protein_coding |
| ENSG0000014445.12  | -1.8554974 | 4.615398   | 2.38E-08   | 1.73E-07   | 4.36      | 4.77      | 1.82      | 1.99  | 0.01 | OSBP1L                  | chr3  | protein_coding |
| ENSG0000017926.11  | 5.2172153  | -2.8860383 | 0.0000000  | 0.0000000  | 0.0000000 | 0.0000000 | 0.0000000 | 0.00  | 0.00 | ACAD10                  | chr17 | protein_coding |
| ENSG00000204731.6  | -2.4968279 | -2.7137396 | 0.0004384  | 0.0246931  | 0         | 0.05      | 0         | 0.01  | 0.01 | CAD                     | chr1  | protein_coding |
| ENSG0000015738.17  | -1.1466697 | 6.22840233 | 7.20E-05   | 0.0023902  | 39.4      | 33.07     | 20.94     | 22.1  | 0.01 | DRH54                   | chr14 | protein_coding |
| ENSG00000204950.3  | -1.0365217 | 1.27044457 | 0.0000000  | 0.0000000  | 0.0000000 | 0.0000000 | 0.0000000 | 0.00  | 0.00 | LRRC10B                 | chr1  | protein_coding |
| ENSG00000269846.1  | 2.9683982  | -2.0907488 | 0.0006192  | 0.00229154 | 0.04      | 0         | 0.02      | 0.41  | 0.01 | RPL4-62111              | chr20 | antisease      |
| ENSG00000146678.8  | 1.79564    | 1.7061061  | 0.0000000  | 0.0000000  | 0.0000000 | 0.0000000 | 0.0000000 | 0.00  | 0.00 | GFPR1                   | chr7  | protein_coding |
| ENSG00000178537.8  | -1.5262975 | 4.6959964  | 2.34E-07   | 1.48E-06   | 16.07     | 16.16     | 7.14      | 7.78  | 0.01 | SLC25A2                 | chr4  | protein_coding |
| ENSG00000208102.12 | 3.31469784 | -0.4058913 | 1.04E-09   | 9.04E-09   | 1.1       | 1.42      | 25.63     | 7.49  | 0.01 | ALG2T171.2              | chr14 | mRNA           |
| ENSG00000110339.3  | 1.83245458 | 5.10411284 | 5.88E-10   | 5.26E-09   | 18.6      | 17.19     | 6.26      | 6.47  | 0.01 | FANCF                   | chr17 | protein_coding |
| ENSG00000136444.8  | -2.2174464 | 4.58081513 | 2.36E-12   | 2.86E-11   | 12.95     | 12.06     | 4.07      | 3.62  | 0.01 | RSAD1                   | chr14 | protein_coding |
| ENSG00000188820.11 | 1.8655249  | 0.0445894  | 9.04E-06   | 4.42E-05   | 0.56      | 0         | 1.43      | 1.39  | 0.01 | FAM26F                  | chr17 | protein_coding |
| ENSG00000135486.6  | 1.4254311  | 0.9811112  | 0.0204468  | 0.00748749 | 0.17      | 0.19      | 0.1       | 0.21  | 0.01 | RNT1                    | chr16 | protein_coding |
| ENSG00000110429.12 | 1.15367389 | 2.43191179 | 0.0002926  | 0.00007653 | 0.27      | 0.2       | 0.49      | 0.92  | 0.01 | FBXO3                   | chr11 | protein_coding |
| ENSG0000012515.4   | 6.5186871  | -2.0237618 | 1.78E-06   | 9.85E-06   | 0         | 0         | 0.18      | 0.12  | 0.01 | KCNK13                  | chr16 | protein_coding |
| ENSG0000010146.10  | 1.8851185  | 0.1952001  | 8.59E-18   | 3.8E-17    | 0.04      | 0.04      | 0.34      | 0.42  | 0.01 | NARPFLD                 | chr1  | protein_coding |
| ENSG00000178573.6  | 2.81147066 | -0.165742  | 4.71E-06   | 2.44E-05   | 0.04      | 0.02      | 0.14      | 0.2   | 0.01 | MAF                     | chr16 | protein_coding |
| ENSG0000017817.12  | 0.002969   | -0.3377467 | 0.0000000  | 0.0000000  | 0.0000000 | 0.0000000 | 0.0000000 | 0.00  | 0.00 | NEDD4                   | chr16 | protein_coding |
| ENSG00000162966.11 | -4.4637847 | 0.3704629  | 9.34E-20   | 2.20E-18   | 0.26      | 0.32      | 0.01      | 0.02  | 0.01 | ZNF320                  | chr19 | protein_coding |
| ENSG0000011201.9   | -7.5667983 | -1.3550377 | 3.22E-11   | 3.41E-10   | 0.11      | 0.07      | 0.01      | 0     | 0.01 | KNF1                    | chrX  | protein_coding |
| ENSG00000119965.11 | -2.4742651 | -0.0092088 | 0.0000000  | 0.0000000  | 0.0000000 | 0.0000000 | 0.0000000 | 0.00  | 0.00 | CDL46B8                 | chr10 | protein_coding |
| ENSG00000198373.11 | 4.5949303  | 0.7833292  | 1.24E-06   | 7.02E-06   | 7.12      | 7.49      | 2.62      | 25.2  | 0.01 | WW                      | chr16 | protein_coding |
| ENSG00000067900.6  | 0.14991203 | 2.85866418 | 1.69E-30   | 8.00E-29   | 0.04      | 0.09      | 0.92      | 2.18  | 0.01 | ROCK1                   | chr18 | protein_coding |
| ENSG00000104870.11 | 2.1847708  | 2.9477789  | 1.45E-13   | 7.4E-13    | 0.36      | 0.37      | 0.19      | 4.17  | 0.01 | FCGR2                   | chr16 | protein_coding |
| ENSG00000173226.15 | 1.78491844 | 2.9379967  | 1.01E-08   | 7.73E-08   | 1.08      | 1.04      | 3.89      | 5.9   | 0.01 | KOXB1                   | chr1  | protein_coding |
| ENSG00000219660.1  | 5.47921296 | -2.7333202 | 0.0001808  | 0.00495521 | 0         | 0         | 0.19      | 0.08  | 0.01 | RPL1-849N1              | chr17 | TEC            |
| ENSG00000164676.14 | 2.174661   | 2.8641782  | 1.43E-12   | 2.19E-13   | 0.13      | 0.09      | 0.01      | 1.39  | 0.01 | KOXB1                   | chr1  | protein_coding |
| ENSG00000100138.12 | -1.304577  | 0.8017143  | 6.26E-06   | 3.16E-05   | 178.83    | 160.38    | 91.4      | 91.4  | 0.01 | NHP21                   | chr22 | protein_coding |
| ENSG0000006047.11  | 1.96547183 | 2.3499952  | 7.07E-18   | 1.44E-16   | 0.59      | 1.17      | 7.17      | 4.17  | 0.01 | Y box binding protein 2 | chr17 | protein_coding |
| ENSG00000138246.14 | 2.9400000  | 0.9569826  | 2.90E-10   | 1.51E-07   | 0.03      | 0.14      | 0.14      | 0.6   | 0.01 | DNAC13                  | chr1  | protein_coding |
| ENSG00000085511.8  | 1.5635601  | 3.40682243 | 2.53E-07   | 1.60E-06   | 0.71      | 0.84      | 2.88      | 3.24  | 0.01 | MAP3K4                  | chr16 | protein_coding |
| ENSG00000197602.14 | 2.18158464 | 0.0000000  | 0.0000000  | 0.0000000  | 0.0000000 | 0.0000000 | 0.0000000 | 0.00  | 0.00 | CCO446                  | chrX  | protein_coding |
| ENSG00000166707.9  | 2.69571567 | -1.555445  | 0.00013983 | 0.00054609 | 0.02      | 0.02      | 0.14      | 0.17  | 0.01 | ZCCHC18                 | chrX  | protein_coding |
| ENSG00000227776.5  | 2.02961001 | -1.561869  | 0.0024943  | 0.00738991 | 0.04      | 0.08      | 0.18      | 0.45  | 0.01 | LAGL5-AS1               | chr1  | antisease      |
| ENSG00000167107.11 | 5.1688945  | 0.0000000  | 0.0000000  | 0.0000000  | 0.0000000 | 0.0000000 | 0.0000000 | 0.00  | 0.00 | COA                     | chr17 | protein_coding |
| ENSG00000095321.15 | -6.6315419 | 5.6183093  | 7.10E-06   | 2.50E-05   | 24.78     | 23.8      | 0.31      | 0.34  | 0.01 | CRAT                    | chr9  | protein_coding |
| ENSG00000126503.3  | -3.3828863 | -0.0247563 | 7.48E-13   | 9.50E-12   | 0.3       | 0.42      | 0.06      | 0.03  | 0.01 | RLT1                    | chr11 | protein_coding |
| ENSG00000167101.1  | 1.7403409  | 0.50767871 | 1.43E-12   | 4.21E-13   | 0.09      | 0.08      | 0.01      | 2.46  | 0.01 | CTD-25872               | chr11 | protein_coding |
| ENSG00000168955.3  | 5.6609976  | -2.616209  | 0.0008564  | 0.0028128  | 0         | 0         | 0.03      | 0.14  | 0.01 | TMS620                  | chr1  | protein_coding |
| ENSG00000265801.1  | 4.54733081 | -2.780128  | 0.0000000  | 0.0        |           |           |           |       |      |                         |       |                |

|                    |            |            |            |            |        |        |        |                  |                                                                                                      |                                                                                                   |                |                |
|--------------------|------------|------------|------------|------------|--------|--------|--------|------------------|------------------------------------------------------------------------------------------------------|---------------------------------------------------------------------------------------------------|----------------|----------------|
| ENSG00000251139.1  | 5.07221595 | -2.9660662 | 0.0104055  | 0.02582742 | 0      | 0      | 0.13   | 0.14             | RP11-320P7 --                                                                                        |                                                                                                   |                |                |
| ENSG00000109834.1  | 2.0584956  | 1.0777777  | 0.0004967  | 0.9864656  | 0      | 0.47   | 0.03   | 0.83 SAAO15      | sterile alpha motif domain containing 15                                                             | chr12                                                                                             | lncRNA         |                |
| ENSG0000012175.1   | 2.0745567  | 1.3003787  | 0.05045    | 0.403E-08  | 0.06   | 0.1    | 0.26   | 0.62 MALT1       | MALT1 paracaspase                                                                                    | chr18                                                                                             | protein_coding |                |
| ENSG0000016604.13  | 2.52765449 | 2.22595844 | 7.00E-14   | 9.95E-13   | 0.09   | 0.18   | 0.55   | 0.15 CEP295      | centrosomal protein 295kDa                                                                           | chr11                                                                                             | protein_coding |                |
| ENSG0000016551.12  | 3.0584975  | 0.0000000  | 0.0000000  | 0.0000000  | 0      | 0      | 0.00   | 0.05 ALPL        | alkali phosphatase, liver/bone/kidney                                                                | chr10                                                                                             | protein_coding |                |
| ENSG00000231190.3  | 1.14617668 | 1.08401584 | 1.93E-05   | 8.88E-05   | 0.06   | 0.06   | 0.11   | 0.47 MLLT11      | myeloid/lymphoid or mixed-lineage leukemia (thrombopoietin receptor, Drosophila); translocated to 11 | chr17                                                                                             | protein_coding |                |
| ENSG00000231195.1  | 3.8712652  | -2.1134597 | 8.40E-05   | 0.0003415  | 0      | 0.02   | 0.23   | 0.19 AC025242    |                                                                                                      | chr17                                                                                             | lncRNA         |                |
| ENSG00000138029.9  | 1.84204741 | 5.60141486 | 2.96E-06   | 5.07E-03   | 0.03   | 0.06   | 0.88   | 0.01 RING        | ring finger protein 151                                                                              | chr17                                                                                             | protein_coding |                |
| ENSG00000233846.2  | -1.5390452 | -0.153043  | 0.0002247  | 0.00083409 | 0.08   | 0.23   | 0.08   | 0.06 PCDHGA10    | protocadherin gamma subfamily A, 10                                                                  | chr17                                                                                             | protein_coding |                |
| ENSG00000152952.10 | 2.7403765  | 3.7417424  | 5.52E-18   | 1.13E-16   | 0.07   | 0.59   | 3.08   | 8.24 FLOCT2      | procollagen-leukine 2, oxoglutarate 5-dioxygenase 2                                                  | chr3                                                                                              | protein_coding |                |
| ENSG00000165413.9  | 2.5826166  | 1.16611046 | 1.46E-06   | 4.48E-05   | 0.03   | 0.1    | 0.0    | 0.00 TMEM10      | transmembrane protein 10                                                                             | chr10                                                                                             | protein_coding |                |
| ENSG00000149191.9  | -1.3252528 | 6.72356764 | 4.73E-06   | 2.45E-05   | 0.78   | 0.89   | 0.89   | 44.77 BOD1       | biorientation of chromosomes in cell division 1                                                      | chr3                                                                                              | protein_coding |                |
| ENSG00000197803.7  | 2.2932466  | 5.29117661 | 2.83E-11   | 1.44E-14   | 0.11   | 0.36   | 181.4  | 19.05 HST1H2BK   | histone cluster 1, H2BK                                                                              | chr15                                                                                             | protein_coding |                |
| ENSG00000232343.1  | 1.8459849  | -0.2688166 | 5.98E-05   | 0.00017345 | 0.31   | 0.59   | 1.6    | 1.64 RP13-131K1  |                                                                                                      | chr16                                                                                             | antisense      |                |
| ENSG00000179580.8  | -2.7451228 | -2.5779702 | 0.003237   | 0.00945156 | 0.33   | 0      | 0      | 0.06 RNF151      | ring finger protein 151                                                                              | chr16                                                                                             | protein_coding |                |
| ENSG00000171533.10 | 1.113003   | 2.39947592 | 1.41E-05   | 1.59E-05   | 0      | 0.182  | 0      | 1.71 MAP6        | microtubule-associated protein 6                                                                     | chr11                                                                                             | protein_coding |                |
| ENSG00000121214.12 | 1.2201065  | 0.8664561  | 0.00064136 | 0.00021989 | 0.1    | 0.27   | 0.35   | 0.77 WWP1        | WW domain containing E3 ubiquitin protein ligase 1                                                   | chr8                                                                                              | protein_coding |                |
| ENSG0000016451.12  | 1.5223588  | 3.4666668  | 5.50E-07   | 3.03E-06   | 1.25   | 1.65   | 4.37   | 6.79 CENPN       | centromere protein                                                                                   | chr16                                                                                             | protein_coding |                |
| ENSG00000181222.13 | 1.0338282  | 5.01753387 | 0.0024453  | 0.00091957 | 36.36  | 44.13  | 117.07 | 105.61 POLR2A    | polymere RNA (DNA directed) polypeptide A, 220kDa                                                    | chr17                                                                                             | protein_coding |                |
| ENSG00000120644.9  | 5.8023914  | -2.6705827 | 0.00084136 | 0.00021818 | 0      | 0      | 0.27   | 0.27 SPG20-AS1   | SPG20 antisense RNA 1                                                                                | chr13                                                                                             | antisense      |                |
| ENSG00000226354.4  | 3.8544582  | -2.1235498 | 8.40E-05   | 0.0003415  | 0.04   | 0      | 0.35   | 0.04 UNC105A4    |                                                                                                      | chr18                                                                                             | lncRNA         |                |
| ENSG00000129812.7  | 2.6918811  | 1.85372328 | 1.02E-14   | 1.59E-13   | 0.22   | 0.07   | 1.27   | 3.59PT1          | schizophrenia-1-phosphate phosphatase 1                                                              | chr14                                                                                             | protein_coding |                |
| ENSG00000103915.15 | 2.5729939  | 0.8738364  | 5.56E-11   | 5.5E-10    | 0.05   | 0.06   | 0.17   | 0.7              | OSBPFL8                                                                                              | oxysterol binding protein-like 8                                                                  | chr12          | protein_coding |
| ENSG00000278634.1  | -1.4029308 | 2.0373467  | 1.00E-05   | 0.67E-05   | 3.81   | 2.94   | 1.44   | 1.96 RP11-4580.1 |                                                                                                      | chr17                                                                                             | antisense      |                |
| ENSG00000169944.4  | -1.1174399 | 8.1020253  | 0.0001689  | 0.00062715 | 15.29  | 12.13  | 0.0    | 8.55 TMEM42      | transmembrane protein 42                                                                             | chr17                                                                                             | protein_coding |                |
| ENSG00000144395.16 | 2.6622598  | 0.9926362  | 6.37E-12   | 7.31E-11   | 0.07   | 0.13   | 0.58   | 1.08 CDC150      | coiled-coil domain containing 150                                                                    | chr2                                                                                              | protein_coding |                |
| ENSG00000236661.1  | -1.7253475 | -1.2151504 | 3.98E-12   | 4.67E-11   | 1.45   | 0.59   | 0      | 0                | A000147.9                                                                                            |                                                                                                   | chr16          | antisense      |
| ENSG00000211895.4  | -5.6609181 | -2.7818379 | 0.0085654  | 0.0028128  | 0.05   | 0.23   | 0      | 0                | IGHA1                                                                                                | immunoglobulin heavy constant alpha 1                                                             | chr14          | IG C gene      |
| ENSG00000179387.8  | 1.9261395  | 1.2809463  | 5.60E-08   | 3.89E-07   | 0.17   | 0.15   | 0.61   | 0.14 ELMOD2      | ELMOD2-12 domain containing 2                                                                        | chr16                                                                                             | protein_coding |                |
| ENSG0000025764.1   | 0.0011668  | -2.6722499 | 0.0043984  | 0.0246903  | 0.02   | 0      | 0.08   | 0.14 UXT-AS1     | UXT antisense RNA 1                                                                                  | chr16                                                                                             | antisense      |                |
| ENSG0000028641.14  | -1.061245  | 9.58641373 | 0.00024817 | 0.00092405 | 143.42 | 170.79 | 101.56 | 100.23 NF2E1     | nuclear factor, erythroid 2-like 1                                                                   | chr17                                                                                             | protein_coding |                |
| ENSG00000197626.1  | 1.8777473  | 2.48455237 | 4.24E-09   | 3.44E-08   | 0.35   | 0.4    | 1.52   | 2.16 PKD2        | polycystic kidney disease 2 (autosomal dominant)                                                     | chr16                                                                                             | protein_coding |                |
| ENSG00000272363.1  | 0.0013461  | -2.8669109 | 0.0014642  | 0.0257423  | 0.23   | 0.08   | 0      | 0                | RP11-34AP1.1                                                                                         |                                                                                                   | chr17          | antisense      |
| ENSG00000295999.1  | 2.5746668  | -2.3509436 | 0.0045824  | 0.0219303  | 0.01   | 0      | 0.09   | 0.03             | RP11-121C2                                                                                           |                                                                                                   | chr3           | lncRNA         |
| ENSG0000011454.13  | 2.1120000  | -2.249261  | 0.0071391  | 0.00484659 | 0      | 0.01   | 0.08   | 0.03             | PRMC4B                                                                                               | FERM domain containing 4B                                                                         | chr4           | protein_coding |
| ENSG00000254445.1  | 0.8894645  | -0.0622981 | 0.0088913  | 0.04519557 | 0      | 0      | 0.04   | 0.11             | HPSP2-C11orf52 readthrough (NM0 candidate)                                                           | chr12                                                                                             | protein_coding |                |
| ENSG0000013117.12  | 2.0417636  | 0.1346604  | 1.72E-06   | 9.57E-06   | 0.04   | 0.1    | 0.04   | 0.46             | CNFR8                                                                                                | connexin coupled receptor 89B                                                                     | chr11          | protein_coding |
| ENSG00000188932.13 | 0.5949602  | 0.0000000  | 0.0000000  | 0.0000000  | 0      | 0      | 0      | 0.34             | GPBB2                                                                                                | glycoprotein beta                                                                                 | chr12          | protein_coding |
| ENSG00000183317.15 | 5.7053035  | 1.89830756 | 6.48E-41   | 5.23E-39   | 0.01   | 0      | 1.2    | 0.18             | EPHA10                                                                                               | Eph receptor A10                                                                                  | chr11          | protein_coding |
| ENSG0000016305.13  | 4.0401467  | 2.20055304 | 2.24E-26   | 8.46E-25   | 0.07   | 0.08   | 12.3   | 2.19             | PFPR2                                                                                                | protein phosphatase 4, regulatory subunit 2                                                       | chr3           | protein_coding |
| ENSG0000012584.6   | 0.0069806  | 0.0000000  | 0.0000000  | 0.0000000  | 0      | 0      | 0      | 0                | PTGS2                                                                                                | prostaglandin H synthase 2 (cyclooxygenase 2)                                                     | chr14          | protein_coding |
| ENSG00000118903.7  | 2.1640479  | 0.57352398 | 4.00E-08   | 2.81E-07   | 0.08   | 0.07   | 0.4    | 0.54             | EXOC8                                                                                                | exocyst complex component 8                                                                       | chr11          | protein_coding |
| ENSG00000166588.6  | 7.4897135  | -1.2918717 | 7.65E-11   | 7.77E-10   | 0.7    | 0.62   | 0      | 0.54             | UKP1A                                                                                                | uropkinase 1A                                                                                     | chr19          | protein_coding |
| ENSG0000021717.7   | 1.2742031  | 8.45360119 | 4.74E-10   | 4.33E-09   | 1.64   | 2.52   | 4.95   | 8.53             | CUCP2                                                                                                | chloride intracellular channel 1                                                                  | chr19          | protein_coding |
| ENSG00000207778.1  | 3.10155371 | -2.6122053 | 0.0043894  | 0.0246903  | 0.01   | 0.03   | 0.15   | 0.15             | PGMP52                                                                                               | cholesterol/human 5-pseudoenone 2                                                                 | chr9           | lncRNA         |
| ENSG0000014226.12  | -1.5168012 | -1.4312533 | 0.0151564  | 0.0292584  | 0.04   | 0.28   | 0.11   | 0.05             | ICG2RA                                                                                               | IC fragment of IgG, low affinity IIa, receptor (CD32)                                             | chr1           | protein_coding |
| ENSG00000105925.10 | 0.812121   | 0.1315931  | 1.29E-10   | 2.72E-09   | 0.08   | 0.04   | 0.1    | 0.08             | TPP2                                                                                                 | tissue factor pathway inhibitor 2                                                                 | chr10          | protein_coding |
| ENSG00000252830.2  | 1.56042153 | 0.14695093 | 1.67E-07   | 1.08E-06   | 2.55   | 3.85   | 7.33   | 18.01            | IDO1                                                                                                 | EP300 interacting inhibitor of differentiation 1                                                  | chr15          | protein_coding |
| ENSG00000189364.6  | 0.5147047  | 0.0000000  | 0.0000000  | 0.0000000  | 0      | 0      | 0      | 4.07             | RTNMR1                                                                                               | reticulon 1                                                                                       | chr17          | protein_coding |
| ENSG00000117525.12 | 2.0849643  | 3.8453073  | 9.73E-12   | 1.09E-10   | 0.17   | 0.29   | 8.89   | 12.94            | F3                                                                                                   | coagulation factor III (thromboplastin, tissue factor)                                            | chr1           | protein_coding |
| ENSG00000197611.13 | 1.1193031  | -0.2224125 | 0.0018013  | 0.0215806  | 0.49   | 0.13   | 0.66   | 1.16             | C16orf86                                                                                             | chromosome 16 open reading frame 86                                                               | chr16          | protein_coding |
| ENSG00000168724.13 | 1.2742031  | 8.45360119 | 4.74E-10   | 4.33E-09   | 1.64   | 2.52   | 4.95   | 8.53             | DNAH23                                                                                               | DnaH (Hsp40) homolog, subfamily C, member 21                                                      | chr5           | protein_coding |
| ENSG00000336672.14 | -2.4687657 | 1.0744556  | 1.19E-11   | 1.33E-10   | 0.61   | 0.79   | 0.15   | 0.19             | USP2                                                                                                 | ubiquitin specific peptidase 2                                                                    | chr11          | protein_coding |
| ENSG00000147321.12 | 6.30147617 | -2.1795914 | 1.55E-05   | 7.26E-05   | 0      | 0      | 0.03   | 0.13             | C16orf87                                                                                             | chromosome X open reading frame 57                                                                | chr16          | protein_coding |
| ENSG0000024677.1   | 3.8830770  | -1.384464  | 0.0000000  | 0.0000000  | 0      | 0      | 0      | 0.25             | RP11-6141A                                                                                           |                                                                                                   | chr16          | lncRNA         |
| ENSG0000019144.15  | 1.6085694  | 6.86550497 | 3.53E-08   | 2.51E-07   | 7.98   | 7.89   | 31.17  | 32.75            | PHLDB1                                                                                               | pleckstrin homology-like domain, family B, member 1                                               | chr11          | protein_coding |
| ENSG00000145914.14 | -2.5401411 | 2.7951918  | 3.76E-15   | 6.08E-14   | 0.96   | 0.25   | 0.21   | 0.21             | ARHGAP26                                                                                             | Rho GTPase activating protein 26                                                                  | chr5           | protein_coding |
| ENSG00000163862.14 | 0.3125108  | 1.315E-10  | 3.10E-07   | 1.33E-06   | 34.94  | 16.58  | RP18   | 16.58            | RP18                                                                                                 | ribosomal protein 18                                                                              | chr1           | protein_coding |
| ENSG0000007248.8   | 2.6883008  | 2.58613023 | 2.73E-12   | 3.26E-11   | 0.37   | 0.36   | 1.56   | 3.15             | PDH29                                                                                                | DEAH (Psi-Glu-His) box polypeptide 29                                                             | chr5           | protein_coding |
| ENSG0000015540.13  | 2.2339444  | 0.0000000  | 0.0000000  | 0.0000000  | 0      | 0      | 0      | 0.75             | MOG4                                                                                                 | MOG family member 4, phocin                                                                       | chr2           | protein_coding |
| ENSG00000196267.11 | -1.5779581 | -0.4613589 | 0.0007382  | 0.00251885 | 0.1    | 0.05   | 0.17   | 0.42             | ZNF836                                                                                               | zinc finger protein 836                                                                           | chr19          | protein_coding |
| ENSG0000013117.15  | -6.414903  | 0.9471303  | 2.20E-30   | 1.03E-28   | 1.49   | 1.72   | 0.03   | 0.01             | SH3BGR1                                                                                              | SH3 domain binding glutathione-rich protein like                                                  | chrX           | protein_coding |
| ENSG00000213341.9  | 2.5981601  | 1.8831089  | 0.0000000  | 0.0000000  | 0      | 0      | 0      | 0.12             | 12                                                                                                   | conserved helix-loop-helix ubiquitous motif                                                       | chr12          | protein_coding |
| ENSG00000163939.17 | 1.9640483  | 2.78834282 | 4.92E-10   | 4.47E-09   | 0.26   | 0.31   | 0.14   | 1.55             | PRM1                                                                                                 | polycomb 1                                                                                        | chr1           | protein_coding |
| ENSG0000017988.17  | -1.0028257 | 6.24078698 | 0.0005945  | 0.0012962  | 12.77  | 14.03  | 8.58   | 8.93             | PXD0C1                                                                                               | cytoskeletal-dependent decarboxylase domain containing 1                                          | chr16          | protein_coding |
| ENSG00000124510.16 | 0.0000000  | 0.0000000  | 0.0000000  | 0.0000000  | 0      | 0      | 0      | 27.21            | SERPINE6                                                                                             | serpin family E member 6 (ovalbumin), member 6                                                    | chr16          | protein_coding |
| ENSG00000102882.10 | -1.3017973 | 5.6573349  | 7.52E-06   | 3.74E-05   | 21.39  | 18.73  | 13.13  | 10.34            | MAPK3                                                                                                | mitogen-activated protein kinase 3                                                                | chr16          | protein_coding |
| ENSG00000165688.6  | -1.059197  | 0.14505075 | 0.00037418 | 0.00134039 | 1.39   | 2.24   | 1.87   | 1.46             | NR02                                                                                                 | nuclear receptor subfamily 2, group F, member 2                                                   | chr15          | protein_coding |
| ENSG00000146311.11 | 2.4254187  | -1.1465894 | 0.0009666  | 0.00031396 | 0.36   | 0.06   | 0.1    | 0.19             | RHIC2                                                                                                | Rh family C, glycoprotein 2                                                                       | chr16          | protein_coding |
| ENSG00000168300.12 | 1.7335599  | 0.6117901  | 5.18E-06   | 2.66E-05   | 0.12   | 0.08   | 0.24   | 0.63             | PCMTD1                                                                                               | protein-L-isoaspartate (D-aspartate)-O-methyltransferase domain containing 1                      | chr8           | protein_coding |
| ENSG0000013655.12  | 3.0061663  | 0.9752626  | 5.33E-14   | 7.64E-13   | 0.02   | 0.02   | 0.15   | 0.28             | USP15                                                                                                | ubiquitin specific peptidase 15                                                                   | chr12          | protein_coding |
| ENSG00000221895.5  | 0.7897947  | 2.6913907  | 3.01E-07   | 3.03E-06   | 0.94   | 0.06   | 0.1    | 0.43             | HLG4R                                                                                                | HQMO antisense growth-associated long non-coding RNA                                              | chr1           | antisense      |
| ENSG00000179454.12 | -1.5770205 | -0.5222906 | 0.0011944  | 0.0036441  | 0.02   | 0.06   | 0.03   | 0.26             | KHLH28                                                                                               | kelch-like family member 28                                                                       | chr14          | protein_coding |
| ENSG00000225715.5  | 6.4494613  | 0.0000000  | 0.0000000  | 0.0000000  | 0      | 0      | 0      | 4.00             | TNRC3                                                                                                | tumor necrosis factor receptor class 3 member 3                                                   | chr19          | protein_coding |
| ENSG0000018625.13  | 3.6284353  | 0.5777185  | 1.93E-15   | 3.21E-14   | 0.01   | 0.05   | 0.53   | 0.49             | ATPLA2                                                                                               | ATPase, Na(+)-K(+)-transporting, alpha 2 polypeptide                                              | chr19          | protein_coding |
| ENSG00000164933.15 | 2.5593254  | 1.0754018  | 1.33E-11   | 1.47E-10   | 0.19   | 0.53   | 0.1    | 0.01             | PMS1                                                                                                 | PMS1 postmitotic segregation increased 1 (S. cerevisiae)                                          | chr16          | protein_coding |
| ENSG00000138172.9  | 3.8252114  | 0.2948794  | 0.0000000  | 0.0000000  | 0      | 0      | 0      | 1.32             | CALU4                                                                                                | calmodulin homeostasis modulator 2                                                                | chr10          | protein_coding |
| ENSG0000010238.14  | -1.0998989 | 1.0297736  | 0.00116271 | 0.00376756 | 0.52   | 0.57   | 0.16   | 0.51             | SMARCA1                                                                                              | SWI/SNF-related, matrix associated, actin dependent regulator of chromatin, subfamily A, member 1 | chrX           | protein_coding |
| ENSG00000168487.16 | -2.4610268 | 7.4990604  | 2.31E-16   | 4.13E-15   | 50.29  | 51.66  | 13.37  | 11.69            | BMP1                                                                                                 | bone morphogenetic protein 1                                                                      | chr16          | protein_coding |
| ENSG0000020760.1   | 0.0000000  | 0.0000000  | 0.0000000  | 0.0000000  | 0      | 0      | 0      | 6.41             | C15orf10                                                                                             | small nuclear RNA, HACA box 6                                                                     | chr15          | lncRNA         |
| ENSG00000104763.16 | 1.32658897 | 4.02725206 | 7.86E-06   | 3.90E-05   | 2.37   | 2.74   | 6.68   | 10.49            | ASAH1                                                                                                | N-acylsphingosine amidohydrolase (acid ceramidase) 1                                              | chr1           | protein_coding |
| ENSG00000184702.16 |            |            |            |            |        |        |        |                  |                                                                                                      |                                                                                                   |                |                |

|                    |           |           |           |           |       |        |       |       |              |                                                                                                    |      |                |
|--------------------|-----------|-----------|-----------|-----------|-------|--------|-------|-------|--------------|----------------------------------------------------------------------------------------------------|------|----------------|
| ENSG00000171110    | 1.690455  | 4.793732  | 1.08E-08  | 8.20E-08  | 5.75  | 6.1    | 20.96 | 30.51 | MPK22        | mitochondrial ribosomal protein S22                                                                | chv3 | protein_coding |
| ENSG00000171110    | 1.237716  | 4.856434  | 1.22E-14  | 1.88E-13  | 13.61 | 12.05  | 3.5   | 3.62  | PANX2        | pannexin 2                                                                                         | chv2 | protein_coding |
| ENSG00000171110    | 1.535455  | 4.759919  | 0.000000  | 0.000000  | 0.00  | 0.00   | 0.00  | 0.29  | HCG135       | H1A complex group 135 (non-protein-coding)                                                         | chv3 | antisense      |
| ENSG00000140530.14 | 1.483621  | 1.765044  | 1.38E-07  | 1.99E-06  | 96.46 | 115.98 | 45.7  | 55.17 | ANP23A       | acidic (leucine-rich) nuclear phosphoprotein 23                                                    | chv3 | protein_coding |
| ENSG00000138102.12 | 1.195723  | 0.498281  | 8.88E-05  | 8.48E-05  | 0.52  | 0.3    | 0.14  | 0.14  | TRM54        | translational modulating factor 54                                                                 | chv2 | protein_coding |
| ENSG00000178862.11 | 1.524738  | 1.886211  | 1.11E-09  | 1.11E-09  | 0.19  | 0.19   | 0.19  | 1.19  | LGALS1       | lectican, galactoside-binding                                                                      | chv2 | protein_coding |
| ENSG00000143369.13 | 2.601313  | 3.389183  | 2.15E-16  | 3.88E-15  | 6.75  | 6.69   | 1.5   | 1.4   | ECM1         | extracellular matrix protein 1                                                                     | chv1 | protein_coding |
| ENSG00000268955.5  | 2.227514  | 4.333490  | 2.28E-13  | 3.04E-12  | 45.73 | 34.24  | 9.87  | 12.97 | SNR58        | small nuclear RNA host gene 58                                                                     | chv4 | lncRNA         |
| ENSG00000270017.11 | 1.923872  | 2.098033  | 4.45E-16  | 6.16E-16  | 0.09  | 0.09   | 0.09  | 0.28  | ACAM4        | actin cytoskeleton cell adhesion molecule                                                          | chv3 | protein_coding |
| ENSG00000270171.11 | 1.8716504 | 1.6741001 | 0.0046779 | 0.0137154 | 0.14  | 0      | 0.39  | 0.33  | RPL11-823P2  | ribosomal protein L11-823P2                                                                        | chv5 | TEC            |
| ENSG0000043153.11  | 1.1981038 | 6.326741  | 3.41E-05  | 0.0001507 | 14.53 | 16.85  | 40.05 | 56.24 | ATP1B1       | ATPase, Na+/K+ transporting, beta 1 polypeptide                                                    | chv1 | protein_coding |
| ENSG0000043636.11  | 1.983638  | 0.836140  | 8.66E-14  | 1.64E-14  | 0.04  | 0.06   | 0.06  | 0.3   | BAT2B        | hemodominant adjacent to zinc finger domain, 2B                                                    | chv2 | protein_coding |
| ENSG00000528101.2  | 2.545897  | 1.262967  | 0.000000  | 0.0015623 | 0.04  | 0.04   | 0.2   | 0.14  | RPL11-977B1  | ribosomal protein L11-977B1                                                                        | chv5 | antisense      |
| ENSG00000155867.12 | 1.4142849 | 0.770424  | 0.000000  | 0.0047706 | 0.03  | 0.21   | 0.06  | 1.24  | MEOT         | mediator complex subunit 7                                                                         | chv2 | protein_coding |
| ENSG00000168177.16 | 1.588935  | 1.5232655 | 5.71E-06  | 1.9E-06   | 0.08  | 0.08   | 0.08  | 0.68  | KIF168       | kinetochore protein 168                                                                            | chv5 | protein_coding |
| ENSG00000162777.15 | 3.0618211 | 1.5202439 | 1.96E-21  | 1.30E-19  | 0.96  | 0.83   | 0.92  | 11.12 | DENNDMM2     | DENNDMM2 domain containing 20                                                                      | chv1 | protein_coding |
| ENSG00000176013.13 | 1.089824  | 0.394759  | 5.908881  | 1.10E-08  | 0.00  | 0.00   | 0.00  | 0     | ZNF65        | zinc finger protein 65                                                                             | chv1 | protein_coding |
| ENSG00000177887.7  | 3.458301  | 1.1471728 | 6.90E-05  | 0.0002689 | 0.01  | 0.13   | 0     | 0.02  | ZNF181       | zinc finger and BTB domain containing 41                                                           | chv1 | protein_coding |
| ENSG00000178914.1  | 2.856700  | 2.507929  | 0.073701  | 0.0197584 | 0.04  | 0.02   | 0.01  | 0     | ZNF154       | zinc finger protein 154                                                                            | chv1 | protein_coding |
| ENSG00000193021.11 | 5.0620318 | 2.971678  | 0.000000  | 0.000000  | 0.00  | 0.00   | 0.00  | 0.00  | C15orf58     | chromosome 15 open reading frame 58                                                                | chv1 | protein_coding |
| ENSG00000238811.1  | 8.345054  | 0.6531458 | 1.07E-16  | 3.17E-15  | 0.5   | 0.59   | 0     | 0     | RPL11-7F17.2 | ribosomal protein L11-7F17.2                                                                       | chv4 | lncRNA         |
| ENSG00000108319.1  | 4.8795743 | 1.3399184 | 3.66E-08  | 2.59E-07  | 0     | 0.01   | 0.1   | 0.14  | ASP4         | aspartoacylase                                                                                     | chv1 | protein_coding |
| ENSG00000101017.1  | 0.022653  | 1.108172  | 0.000000  | 0.000000  | 0.00  | 0.00   | 0.00  | 0     | RPL11-152A1  | ribosomal protein L11-152A1                                                                        | chv1 | protein_coding |
| ENSG00000197782.13 | 1.282708  | 0.246836  | 0.0027504 | 0.002827  | 0.06  | 0.04   | 0.08  | 0.02  | ZNF780A      | zinc finger protein 780A                                                                           | chv1 | protein_coding |
| ENSG00000135454.12 | 1.325306  | 3.4599351 | 7.72E-23  | 8.35E-22  | 4.32  | 3.58   | 0.55  | 0.51  | BACALN1      | beta-1,4-N-acetyl-galactosaminyl transferase 1                                                     | chv2 | protein_coding |
| ENSG00000135454.12 | 1.484032  | 0.289265  | 5.28E-02  | 7.30E-02  | 0.00  | 0.00   | 0.00  | 0.00  | SCM4         | scum chain-binding related glycoprotein alpha subunit long interspersed non-protein-coding RNA 173 | chv2 | protein_coding |
| ENSG00000196683.3  | 6.357467  | 1.232604  | 8.95E-06  | 4.38E-05  | 0.15  | 0.16   | 0</   |       |              |                                                                                                    |      |                |

|                    |            |            |            |            |       |       |        |        |               |                                                                                     |       |                      |
|--------------------|------------|------------|------------|------------|-------|-------|--------|--------|---------------|-------------------------------------------------------------------------------------|-------|----------------------|
| ENSG00000157764.11 | 1.15136451 | 1.01779057 | 0.000989   | 0.00325251 | 0.44  | 0.34  | 1.28   | 1.05   | BRAF          | B-Raf proto-oncogene, serine/threonine kinase                                       | chr7  | protein_coding       |
| ENSG00000197059.9  | 1.86703383 | -0.9663265 | 9.76E-05   | 0.0003966  | 0.05  | 0.06  | 0.33   | 0.24   | ZNF420        | zinc finger protein 420                                                             | chr19 | protein_coding       |
| ENSG00000207644.4  | -3.5817465 | -2.6400807 | 0.003237   | 0.00945156 | 0.03  | 0.03  | 0      | 0.01   | INSR          | insulin receptor-related receptor                                                   | chr19 | protein_coding       |
| ENSG00000185099.11 | 1.2024844  | 3.13604188 | 7.40E-05   | 0.00030587 | 0.65  | 0.88  | 2.31   | 2.69   | AP3M1         | adaptor-related protein complex 3, mu 1 subunit                                     | chr10 | protein_coding       |
| ENSG00000133867.14 | -1.783757  | 5.20915845 | 1.26E-09   | 1.08E-08   | 4.25  | 5.61  | 1.82   | 1.96   | TMT1C1        | transmembrane and tetrahydrocoptide repeat containing 1                             | chr12 | protein_coding       |
| ENSG00000189042.12 | 3.97139922 | 0.17552234 | 1.07E-14   | 1.66E-13   | 0.01  | 0.04  | 0.24   | 0.75   | ZNF567        | zinc finger protein 567                                                             | chr19 | protein_coding       |
| ENSG00000242114.4  | -1.615986  | 0.89070931 | 6.25E-06   | 3.13E-05   | 1.76  | 1.42  | 0.8    | 0.58   | MTFR1         | mitochondrial tfrion process 1                                                      | chr22 | protein_coding       |
| ENSG00000206611.1  | 4.9005931  | -3.045493  | 0.010465   | 0.0293742  | 0     | 0     | 3.42   | 0      | SNORD24       | small nucleolar RNA C/D box 24                                                      | chr4  | snoRNA               |
| ENSG0000013737.13  | -2.068783  | 6.76900377 | 2.80E-12   | 3.34E-11   | 16.36 | 20.38 | 6.13   | 5.51   | MDCL1         | mediator of DNA-damage checkpoint 1                                                 | chr4  | protein_coding       |
| ENSG00000280152.1  | 1.99493089 | -0.560653  | 3.32E-05   | 0.0001467  | 0.08  | 0.01  | 0.27   | 0.24   | RP11-331F4.1  | RP11-331F4.1                                                                        | chr16 | TEC                  |
| ENSG00000124140.11 | 1.98477364 | 2.01686515 | 1.82E-09   | 1.53E-08   | 0.19  | 0.19  | 0.07   | 1.03   | SLC12A5       | solute carrier family 12 (potassium/chloride transporter), member 5                 | chr20 | protein_coding       |
| ENSG00000103811.14 | 3.69070257 | 6.41345232 | 5.65E-31   | 2.72E-29   | 3.92  | 5.14  | 79.01  | 76.55  | CTSH          | cathepsin H                                                                         | chr15 | protein_coding       |
| ENSG00000277938.1  | -1.367626  | 0.21622953 | 0.0003073  | 0.0011156  | 0.46  | 0.53  | 0.17   | 0.33   | RP5-965G21    | --                                                                                  | chr20 | lincRNA              |
| ENSG00000155016.16 | 1.19435896 | 1.99204253 | 0.00020352 | 0.00076736 | 0.36  | 0.38  | 0.83   | 1.45   | CYP2U1        | cytochrome P450, family 2, subfamily U, polypeptide 1                               | chr4  | protein_coding       |
| ENSG00000277838.1  | -5.7793342 | -2.7087353 | 0.00047761 | 0.00167191 | 0.26  | 0.14  | 0      | 0      | RP11-213J1P.1 | --                                                                                  | chr22 | lincRNA              |
| ENSG00000204989.9  | -1.4634242 | 6.5149762  | 4.85E-07   | 2.94E-06   | 70.3  | 76.79 | 38.45  | 34.53  | NR6B1         | nuclear factor of kappa light polypeptide gene enhancer in B-cells inhibitor-like 1 | chr6  | protein_coding       |
| ENSG00000276741    | 4.66554413 | -0.7698815 | 5.75E-11   | 5.92E-10   | 0     | 0.03  | 0.31   | 0.79   | RP11-582E3    | --                                                                                  | chr12 | lincRNA              |
| ENSG0000017595.9   | 10.3775446 | 1.39643148 | 9.02E-37   | 5.71E-35   | 0     | 0     | 1.24   | 1.16   | IRF6          | interferon regulatory factor 6                                                      | chr1  | protein_coding       |
| ENSG00000175592.7  | -1.2711028 | 6.4142139  | 1.13E-05   | 5.43E-05   | 48.71 | 57.48 | 30.38  | 26.13  | FCBL1         | FCB-like antigen 1                                                                  | chr11 | protein_coding       |
| ENSG00000179546.4  | -3.7490563 | 2.3902218  | 2.73E-25   | 9.62E-24   | 2.75  | 2.82  | 0.37   | 0.18   | HTR1D         | 5-hydroxytryptamine (serotonin) receptor 1D, G protein-coupled                      | chr1  | protein_coding       |
| ENSG0000040470.10  | -1.0776268 | 4.96528978 | 0.00021034 | 0.00079194 | 13.47 | 12.29 | 8.93   | 7.3    | SMAP2         | small ArfGAP2                                                                       | chr1  | protein_coding       |
| ENSG00000153818.17 | 2.9852895  | 2.4348212  | 4.65E-13   | 5.97E-12   | 0.11  | 0.1   | 0.72   | 0.79   | UTRN          | utrochitin                                                                          | chr6  | protein_coding       |
| ENSG00000210127.1  | 3.6853205  | 2.24800653 | 9.05E-24   | 2.87E-22   | 5.04  | 10.68 | 145.31 | 123.13 | MT-TA         | mitochondrially encoded tRNA alanine                                                | chrM  | lincRNA              |
| ENSG00000251359.4  | 2.0783919  | -0.4920494 | 1.59E-05   | 7.44E-05   | 0.07  | 0.1   | 0.47   | 0.54   | WWC2-AS2      | WWC2 antisense RNA 2                                                                | chr4  | lincRNA              |
| ENSG00000168939.9  | -5.1891546 | -0.7248457 | 3.08E-14   | 4.53E-13   | 0.09  | 0.11  | 0      | 0.01   | SPRY3         | sprouty homolog 3 (Drosophila)                                                      | chr2  | protein_coding       |
| ENSG00000281195.1  | 6.4257156  | -2.0976964 | 3.03E-06   | 1.62E-05   | 0     | 0     | 0.38   | 0.07   | ZNF638-IT1    | ZNF638 intronic transcript 1                                                        | chr11 | processed_transcript |
| ENSG00000145664.10 | 1.15470035 | -0.0295552 | 0.00431545 | 0.01229353 | 0.39  | 0.11  | 0.81   | 0.67   | CSAM          | endothelial cell adhesion molecule                                                  | chr11 | protein_coding       |
| ENSG00000281823.13 | 6.04467832 | -2.3656018 | 4.74E-05   | 0.00020301 | 0     | 0     | 0.39   | 0.33   | FAM159A       | family with sequence similarity 159, member A                                       | chr1  | protein_coding       |
| ENSG00000103037.10 | 1.1727595  | 4.36041481 | 6.68E-05   | 0.00027899 | 2.5   | 3.11  | 7.29   | 9.59   | SETD6         | SET domain containing 6                                                             | chr16 | protein_coding       |
| ENSG00000135341.16 | 1.5861965  | 1.95937423 | 1.13E-06   | 6.41E-06   | 0.19  | 0.29  | 0.67   | 1.25   | MAP3K7        | mitogen-activated protein kinase kinase kinase 7                                    | chr1  | protein_coding       |
| ENSG00000303999.9  | 1.40811195 | 1.09625472 | 5.52E-05   | 0.00023355 | 0.18  | 0.11  | 0.33   | 0.07   | LYRM2         | LYR motif containing 2                                                              | chr6  | protein_coding       |
| ENSG00000182010.9  | 2.98551298 | -1.3398833 | 1.43E-05   | 6.79E-05   | 0.01  | 0     | 0.04   | 0.08   | RTKN2         | roctekin 2                                                                          | chr10 | protein_coding       |
| ENSG0000018761.10  | -1.8478846 | 3.12159434 | 2.09E-09   | 1.89E-08   | 4.74  | 5.56  | 1.89   | 1.92   | CTH           | cathepsin gamma-lyase                                                               | chr1  | protein_coding       |
| ENSG00000183401.13 | 1.33548778 | 2.00333303 | 3.44E-05   | 0.00015143 | 1.39  | 1.17  | 4.82   | 3.77   | CDC159        | coiled-coil domain containing 159                                                   | chr19 | protein_coding       |
| ENSG00000176022.4  | -1.1338979 | 6.05153466 | 9.09E-05   | 0.00036785 | 26.7  | 26.8  | 17.33  | 17     | EGALT6        | UDP-galactose 4-epimerase                                                           | chr1  | protein_coding       |
| ENSG00000279885.1  | 1.0612862  | 3.53496753 | 0.00036146 | 0.00129847 | 4.3   | 3.59  | 2.74   | 2.29   | RASL10B       | RAS-like family 10, member B                                                        | chr17 | protein_coding       |
| ENSG00000253220.1  | 5.56116133 | -2.6812008 | 0.00086564 | 0.00288128 | 0     | 0     | 0.13   | 0.61   | RP11-103H7    | --                                                                                  | chr8  | lincRNA              |
| ENSG00000189189.11 | -1.3024649 | -0.3967544 | 0.0001035  | 0.0003108  | 0.07  | 0.08  | 0.4    | 0.17   | USP46         | ubiquitin specific peptidase 46                                                     | chr1  | protein_coding       |
| ENSG00000067141.15 | 6.93228084 | 6.30381051 | 2.32E-73   | 1.14E-70   | 0.12  | 0.17  | 24.08  | 21.82  | NEO1          | neogenin 1                                                                          | chr15 | protein_coding       |
| ENSG00000232010.1  | 4.57135599 | 1.54104434 | 4.02E-26   | 1.49E-24   | 0.1   | 0.6   | 9.74   | 12.39  | AP001059.5    | --                                                                                  | chr21 | antisense            |
| ENSG00000168765.14 | -10.404476 | 4.41661914 | 1.89E-02   | 5.82E-79   | 7.44  | 6.91  | 0      | 0.01   | GSTM4         | glutathione S-transferase mu 4                                                      | chr1  | protein_coding       |
| ENSG00000183426.14 | -1.7061383 | 0.21183713 | 1.11E-05   | 5.36E-05   | 0.73  | 1.6   | 0.37   | 0.57   | NP1PA1        | nuclear pore complex interacting protein family, member A1                          | chr16 | protein_coding       |
| ENSG00000151208.15 | 1.63639196 | 1.76619811 | 2.04E-08   | 1.49E-07   | 8.38  | 7.96  | 34.45  | 33.24  | DIL5          | discs, large homolog 5 (Drosophila)                                                 | chr10 | protein_coding       |
| ENSG00000280225.1  | -1.3513333 | 2.2722716  | 1.86E-05   | 8.57E-05   | 5.6   | 6.15  | 3.61   | 2.51   | AC074183.3    | --                                                                                  | chr7  | TEC                  |
| ENSG00000277324.1  | 5.37402558 | -2.7967694 | 0.00188008 | 0.00495521 | 0     | 0     | 0.21   | 0      | RP11-850A1    | --                                                                                  | chr18 | antisense            |
| ENSG0000049860.12  | 1.00953315 | 6.44477228 | 0.00045522 | 0.00160336 | 14.62 | 17.93 | 35.59  | 52.08  | HXK8          | hexosaminidase B (beta polypeptide)                                                 | chr5  | protein_coding       |
| ENSG00000121390.16 | 1.33388276 | 5.47428939 | 4.71E-06   | 2.44E-05   | 7.04  | 9.23  | 22.97  | 32.44  | PSPC1         | parapodex component 1                                                               | chr13 | antisense            |
| ENSG00000247708.6  | -1.1351753 | 0.13682159 | 0.00389859 | 0.01067581 | 0.1   | 0.29  | 0.14   | 0.1    | STX18-AS1     | STX18 antisense RNA 1 (head to head)                                                | chr2  | antisense            |
| ENSG0000017292.13  | 1.69962462 | 2.37243134 | 1.05E-07   | 7.03E-07   | 0.33  | 0.21  | 0.92   | 1.4    | CEBPG         | ceramide synthase 6                                                                 | chr2  | protein_coding       |
| ENSG00000159184.7  | 1.95039483 | 4.3357974  | 1.00E-10   | 1.00E-09   | 1.98  | 1.87  | 10.05  | 9.8    | HCOX813       | homeobox B13                                                                        | chr17 | protein_coding       |
| ENSG00000260401.1  | -5.8632571 | 3.01819579 | 1.14E-46   | 1.32E-44   | 3.76  | 3.93  | 0.07   | 0.11   | RP11-800A3    | --                                                                                  | chr11 | sense_intronic       |
| ENSG0000016704.7   | 1.83700644 | 3.08875733 | 3.28E-09   | 2.69E-08   | 0.51  | 0.45  | 1.89   | 2.72   | SLC5D1        | solute carrier family 35 (UDP-GlcA/UDP-GalNAc transporter), member D1               | chr1  | protein_coding       |
| ENSG00000280378.1  | 1.89397405 | -2.0965576 | 0.02035181 | 0.04824221 | 0.03  | 0.03  | 0.26   | 0.08   | RP4-758J24    | --                                                                                  | chr1  | TEC                  |
| ENSG00000175895.3  | 3.27106925 | -0.4300822 | 1.80E-09   | 1.52E-08   | 0     | 0.06  | 0.4    | 0.42   | PLEKH2        | pleckstrin homology domain containing, family F (with FYVE domain) member 2         | chr8  | protein_coding       |
| ENSG0000046813.9   | 2.2772154  | 2.4604113  | 3.18E-12   | 3.78E-11   | 0.4   | 0.63  | 2.46   | 4.17   | AKO3PHPT      | aminoacidate-semialdehyde dehydrogenase-phosphopantetheinyl transferase             | chr11 | protein_coding       |
| ENSG00000163687.12 | 2.2041172  | -1.2653566 | 0.00025593 | 0.00094973 | 0.05  | 0.02  | 0.25   | 0.2    | DNASE1L3      | deoxyribonuclease I-like 3                                                          | chr1  | protein_coding       |
| ENSG00000095397.12 | 1.38822953 | 5.38764598 | 1.98E-06   | 1.09E-05   | 3.52  | 3.42  | 12.41  | 11.76  | DNBS31        | deafness, autosomal recessive 31                                                    | chr9  | protein_coding       |
| ENSG00000151025.9  | 7.73123256 | -1.0389136 | 1.78E-12   | 2.16E-11   | 0     | 0.11  | 0.11   | 0.14   | GRPL98        | G protein-coupled receptor 158                                                      | chr10 | protein_coding       |
| ENSG0000020662.14  | 2.04772914 | 0.13747159 | 1.03E-06   | 5.82E-06   | 0.12  | 0.12  | 0.46   | 0.84   | MTFR1         | mitochondrial translational release factor 1                                        | chr13 | protein_coding       |
| ENSG0000013389.14  | -2.9778007 | 3.93052058 | 6.50E-21   | 1.67E-19   | 2.42  | 2.61  | 0.33   | 0.52   | NPR3          | neutrinetic peptide receptor 3                                                      | chr5  | protein_coding       |
| ENSG00000166450.11 | 1.90749812 | -0.217663  | 2.12E-05   | 9.70E-05   | 0.01  | 0.03  | 0.09   | 0.13   | PRTG          | prototegmen                                                                         | chr15 | protein_coding       |
| ENSG00000138999.9  | -1.9228234 | 0.95616254 | 7.40E-08   | 5.06E-07   | 0.76  | 1.16  | 0.29   | 0.38   | CBLN3         | cerebellin 3 precursor                                                              | chr14 | protein_coding       |
| ENSG00000265382.18 | -1.9808866 | 0.26078512 | 1.79E-11   | 1.95E-10   | 28.27 | 23.36 | 8.75   | 8.6    | TBC1D2        | TBC1 domain family, member 2                                                        | chr9  | protein_coding       |
| ENSG00000204370.7  | 1.81944602 | 1.26433416 | 2.41E-07   | 1.53E-06   | 0.47  | 0.25  | 1.54   | 1.85   | SDHD          | succinate dehydrogenase complex, subunit D, integral membrane protein               | chr11 | protein_coding       |
| ENSG00000259501.1  | 1.0987507  | 2.00055834 | 0.000563   | 0.00195285 | 7.57  | 5.08  | 16.92  | 19.35  | RP11-37C7.1   | --                                                                                  | chr15 | processed_transcript |
| ENSG00000227816.5  | 1.05683275 | 5.16663357 | 0.00028426 | 0.00091747 | 4.96  | 4.64  | 10.38  | 16.44  | DHRP          | deoxyribonuclease                                                                   | chr5  | protein_coding       |
| ENSG00000111647.11 | 2.7891025  | 0.16202964 | 6.83E-10   | 6.10E-09   | 0.03  | 0.04  | 0.21   | 0.49   | UHRF1BP1L     | UHRF1 binding protein 1-like                                                        | chr12 | protein_coding       |
| ENSG00000275714.1  | 1.97000554 | -1.8109004 | 0.00675696 | 0.01629645 | 0.2   | 0.14  | 1.17   | 0.66   | HST1H3A       | histone cluster 1, H3a                                                              | chr6  | protein_coding       |
| ENSG00000166878.13 | 1.78646839 | 2.8976072  | 1.08E-08   | 8.22E-08   | 0.36  | 0.4   | 1.13   | 2.36   | PSM4          | proteasome (prosome, macrocain) activator subunit 4                                 | chr2  | protein_coding       |
| ENSG000001114.13   | 1.59605778 | 2.36961802 | 4.83E-07   | 2.93E-06   | 0.19  | 0.24  | 0.85   | 0.86   | BTBD7         | BTB (POZ) domain containing 7                                                       | chr14 | protein_coding       |
| ENSG0000029200.11  | 6.24952512 | -2.2192205 | 1.55E-05   | 7.28E-05   | 0     | 0     | 0.05   | 0.09   | PRGPR1        | retinitis pigmentosa GTPase regulator interacting protein 1                         | chr14 | protein_coding       |
| ENSG00000251207.5  | 4.8260007  | -3.0239124 | 0.01888073 | 0.04519557 | 0     | 0     | 0.05   | 0.03   | AC108938.5    | --                                                                                  | chr2  | protein_coding       |
| ENSG00000134775.14 | -1.7983856 | 2.68837616 | 9.32E-09   | 7.17E-08   | 1.49  | 1.37  | 0.53   | 0.57   | FHOD3         | formin homology 2 domain containing 3                                               | chr18 | protein_coding       |
| ENSG00000264681.1  | 2.9384135  | -1.7007436 | 0.00023185 | 0.00086708 | 0.06  | 0.03  | 0.22   | 0.79   | CTP-131K11    | --                                                                                  | chr15 | protein_coding       |
| ENSG00000276292.1  | 5.44525159 | -2.7521026 | 0.00188008 | 0.00495521 | 0     | 0     | 0.15   | 1.41   | RP11-33N14    | --                                                                                  | chr12 | antisense            |
| ENSG00000138496.15 | 1.77621896 | 2.42911633 | 2.83E-08   | 2.04E-07   | 0.2   | 0.29  | 0.95   | 1.31   | PARP9         | poly (ADP-ribose) polymerase family, member 9                                       | chr3  | protein_coding       |
| ENSG00000128310.2  | 6.7434818  | -1.8540725 | 2.24E-07   | 1.42E-06   | 0     | 0     | 0.53   | 0.24   | CAUS3         | galatinin receptor 3                                                                | chr22 | protein_coding       |
| ENSG00000175555.8  | 2.10574225 | 5.17945207 | 2.22E-12   | 2.69E-11   | 1.16  | 1.41  | 7.14   | 7.62   | SIPALL1       | signal-induced proliferation-associated 1 like 1                                    | chr14 | protein_coding       |
| ENSG00000107651.11 | 1.54487664 | 3.48340672 | 3.32E-07   | 2.08E-06   | 0.66  | 0.62  | 2.1    | 2.89   | SEC23P        | SEC23 interacting protein                                                           | chr1  | protein_coding       |
| ENSG00000140006.10 | 2.2024119  | 0.13       |            |            |       |       |        |        |               |                                                                                     |       |                      |
