# Supplementary figures and images for: HIF-3α-Induced miR-630 Expression Promotes Cancer Hallmarks in Cervical Cancer Cells by Forming a Positive Feedback Loop
Source: Hindawi journal article supplement (doi:10.1155/2022/5262963), 2022-10-13

A

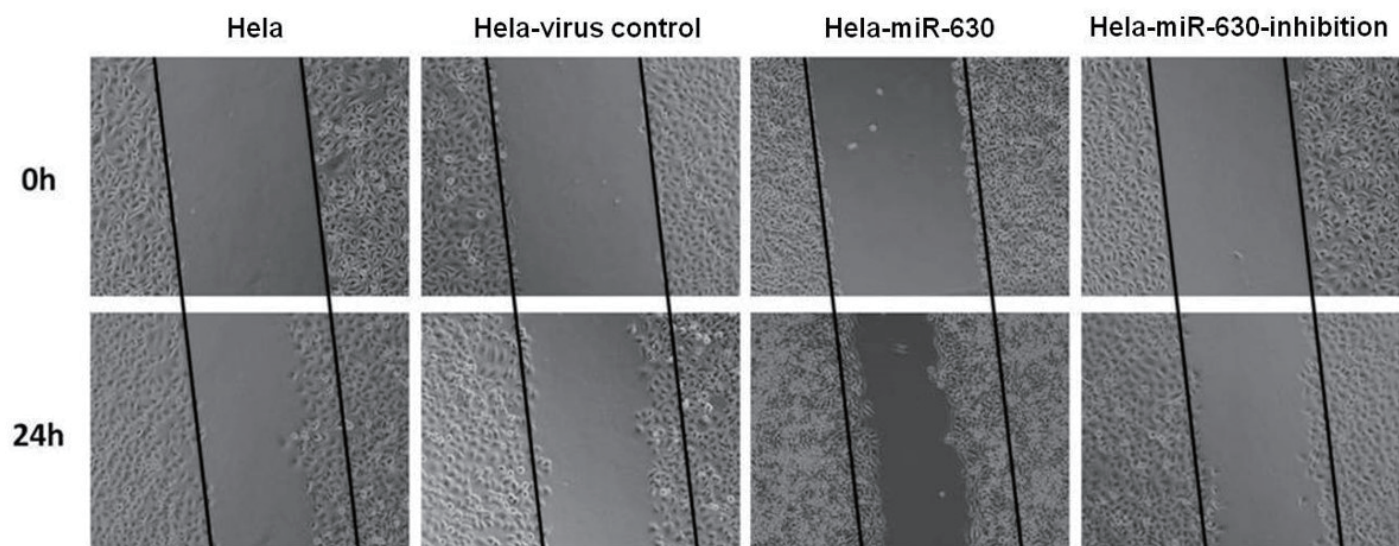

B

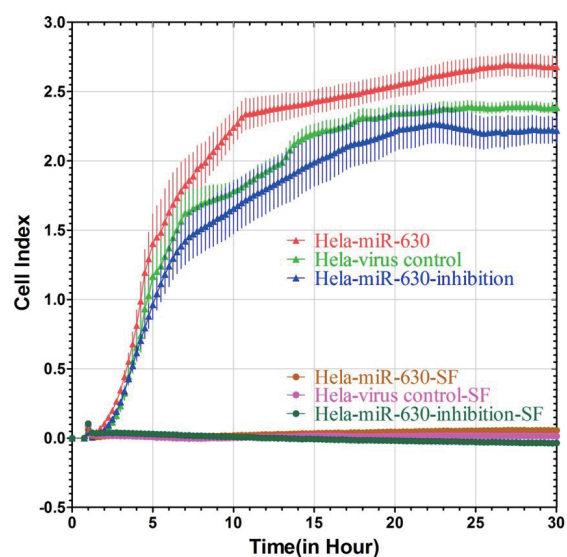

Supplement: f1 [file 5262963.f1.zip]

A

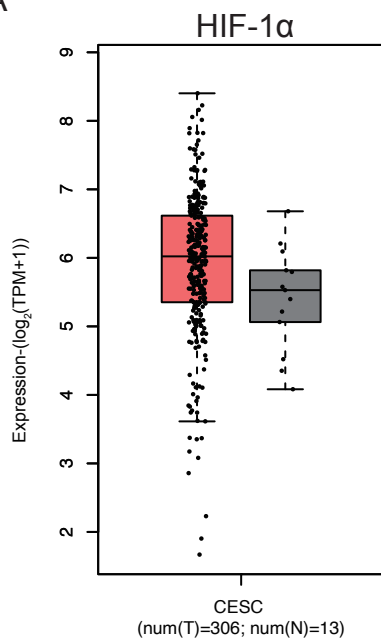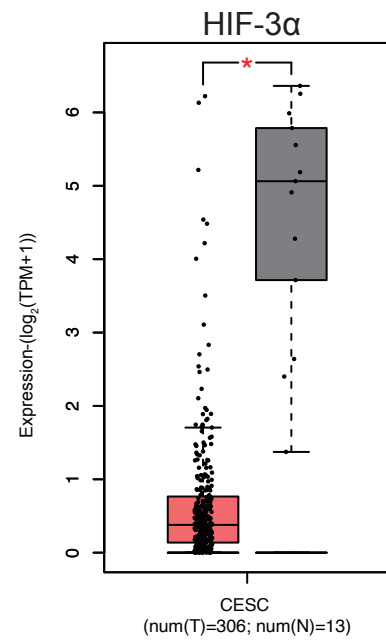

B

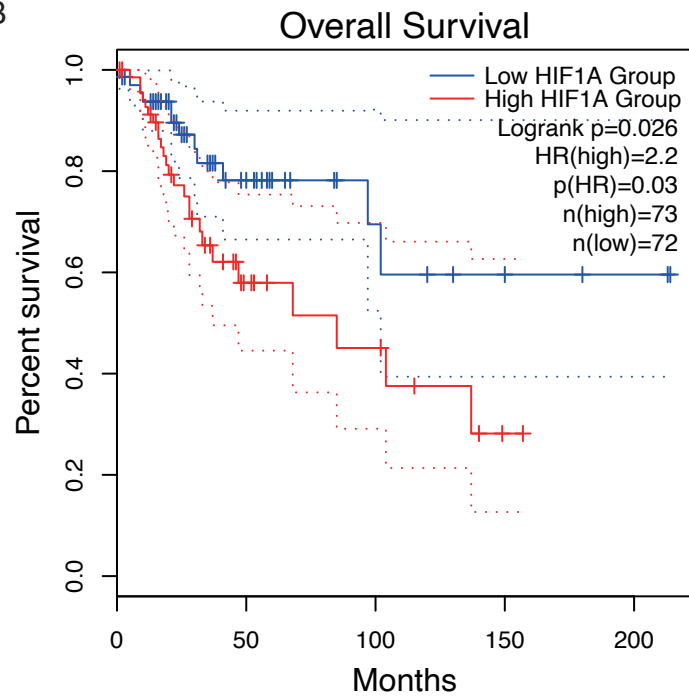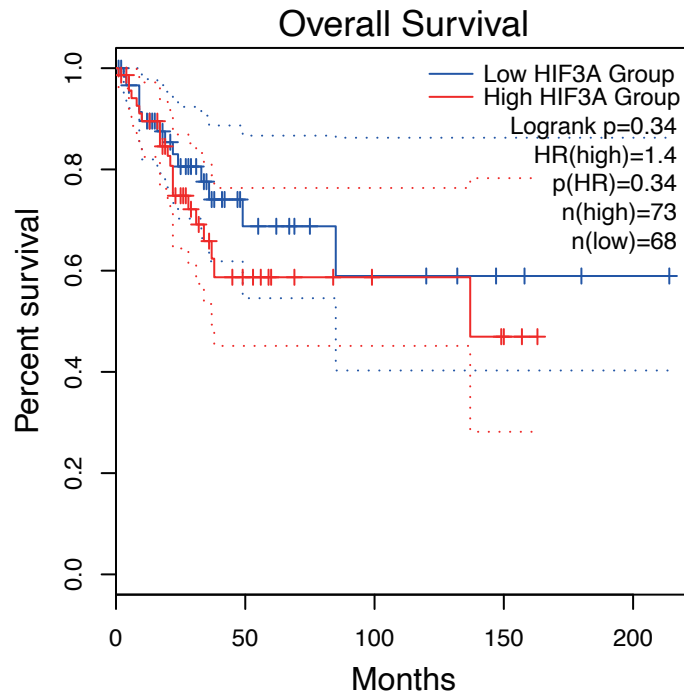

Supplement: f1 [file 5262963.f1.zip]
